# Supplementary material for: Pan-genome analysis of the genus Finegoldia identifies two distinct clades, strain-specific heterogeneity, and putative virulence factors
Source: Springer Nature journal article supplement (doi:10.1038/s41598-017-18661-8), 2018-01-04
Supplement: MOESM1 [file 41598_2017_18661_MOESM1_ESM.pdf]

## Supplementary Information

# Pan-genome analysis of the genus *Finegoldia* identifies two distinct clades, strain-specific heterogeneity, and putative virulence factors

Holger Brüggemann, Anders Jensen, Seven Nazipi, Hüsnu Aslan, Rikke Louise Meyer, Anja Poehlein, Elzbieta Brzuszkiewicz, Munir Al-Zeer, Volker Brinkmann, Bo Söderquist

### Content:

**Figure S1:** Phylogenetic tree of 16S rDNA sequences extracted from draft genomes of *Finegoldia*

**Figure S2:** Phylogenetic tree of 16S rDNA sequences of *Finegoldia* isolates extracted from GenBank

**Figure S3:** Predicted genomic islands in *Finegoldia* genomes

**Figure S4:** Phylogenetic tree of all putative CAMP factors of *Fingoldia* strains

**Figure S5:** CAMP reaction of *Finegoldia* strains at elongated cultivation time

**Figure S6:** Insertional inactivation of *camp1* in strain CCUG54800

**Table S1:** Bidirectional blast of all coding sequences of 12 *Finegoldia* genomes

**Table S2:** CRISPR/cas systems in *Finegoldia* sp.

**Tables S3A-S3L:** Predicted genomic islands in the genomes of *F. magna* and "*F. nericia*"

**Table S4A-S4E:** Blast results showing homologs of host-interacting factors in 12 *Finegoldia* genomes

**Table S5:** *Finegoldia* sp. strains tested in the RapID™ ANA II system

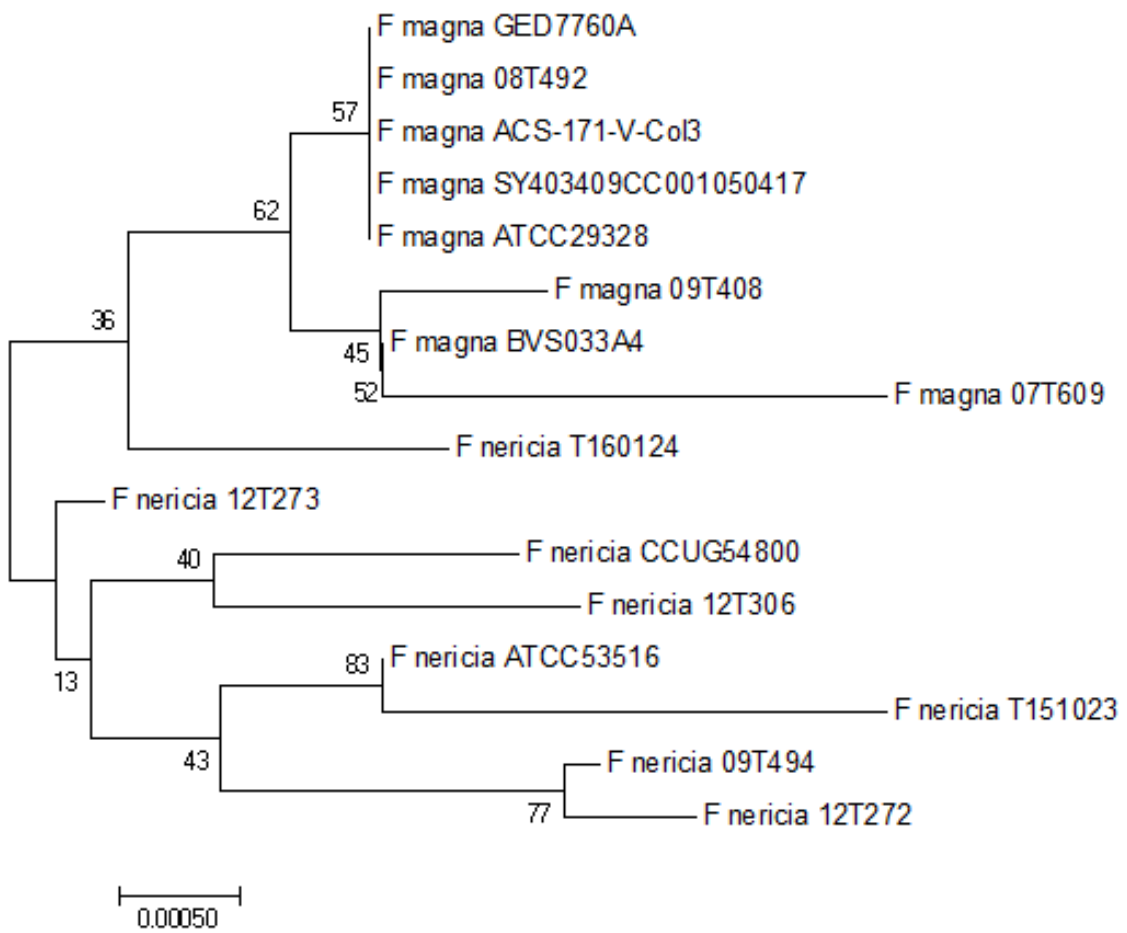

**Figure S1: Phylogenetic tree of 16S rDNA sequences extracted from draft genomes of *Fingoldia***  
 The analysis involved 16 nucleotide sequences. For one genome, *F. magna* ALB8, the 16S rDNA sequence is incomplete. There is an overall high similarity (in average 99%) between the 16S rDNA sequence of strains of *F. magna* and “*F. nericia*”: there are 5 to 9 SNPs in the 16S rDNA of “*F. nericia*” strains compared to the cluster of *F. magna* strains, including the reference strain *F. magna* ATCC29328. The phylogenetic analysis was done with MEGA7. The evolutionary history was inferred using the Neighbor-Joining method. The percentage of replicate trees in which the associated taxa clustered together in the bootstrap test (250 replicates) are shown next to the branches. The tree is drawn to scale, with branch lengths in the same units as those of the evolutionary distances used to infer the phylogenetic tree. The evolutionary distances were computed using the Maximum Composite Likelihood method and are in the units of the number of base substitutions per site.

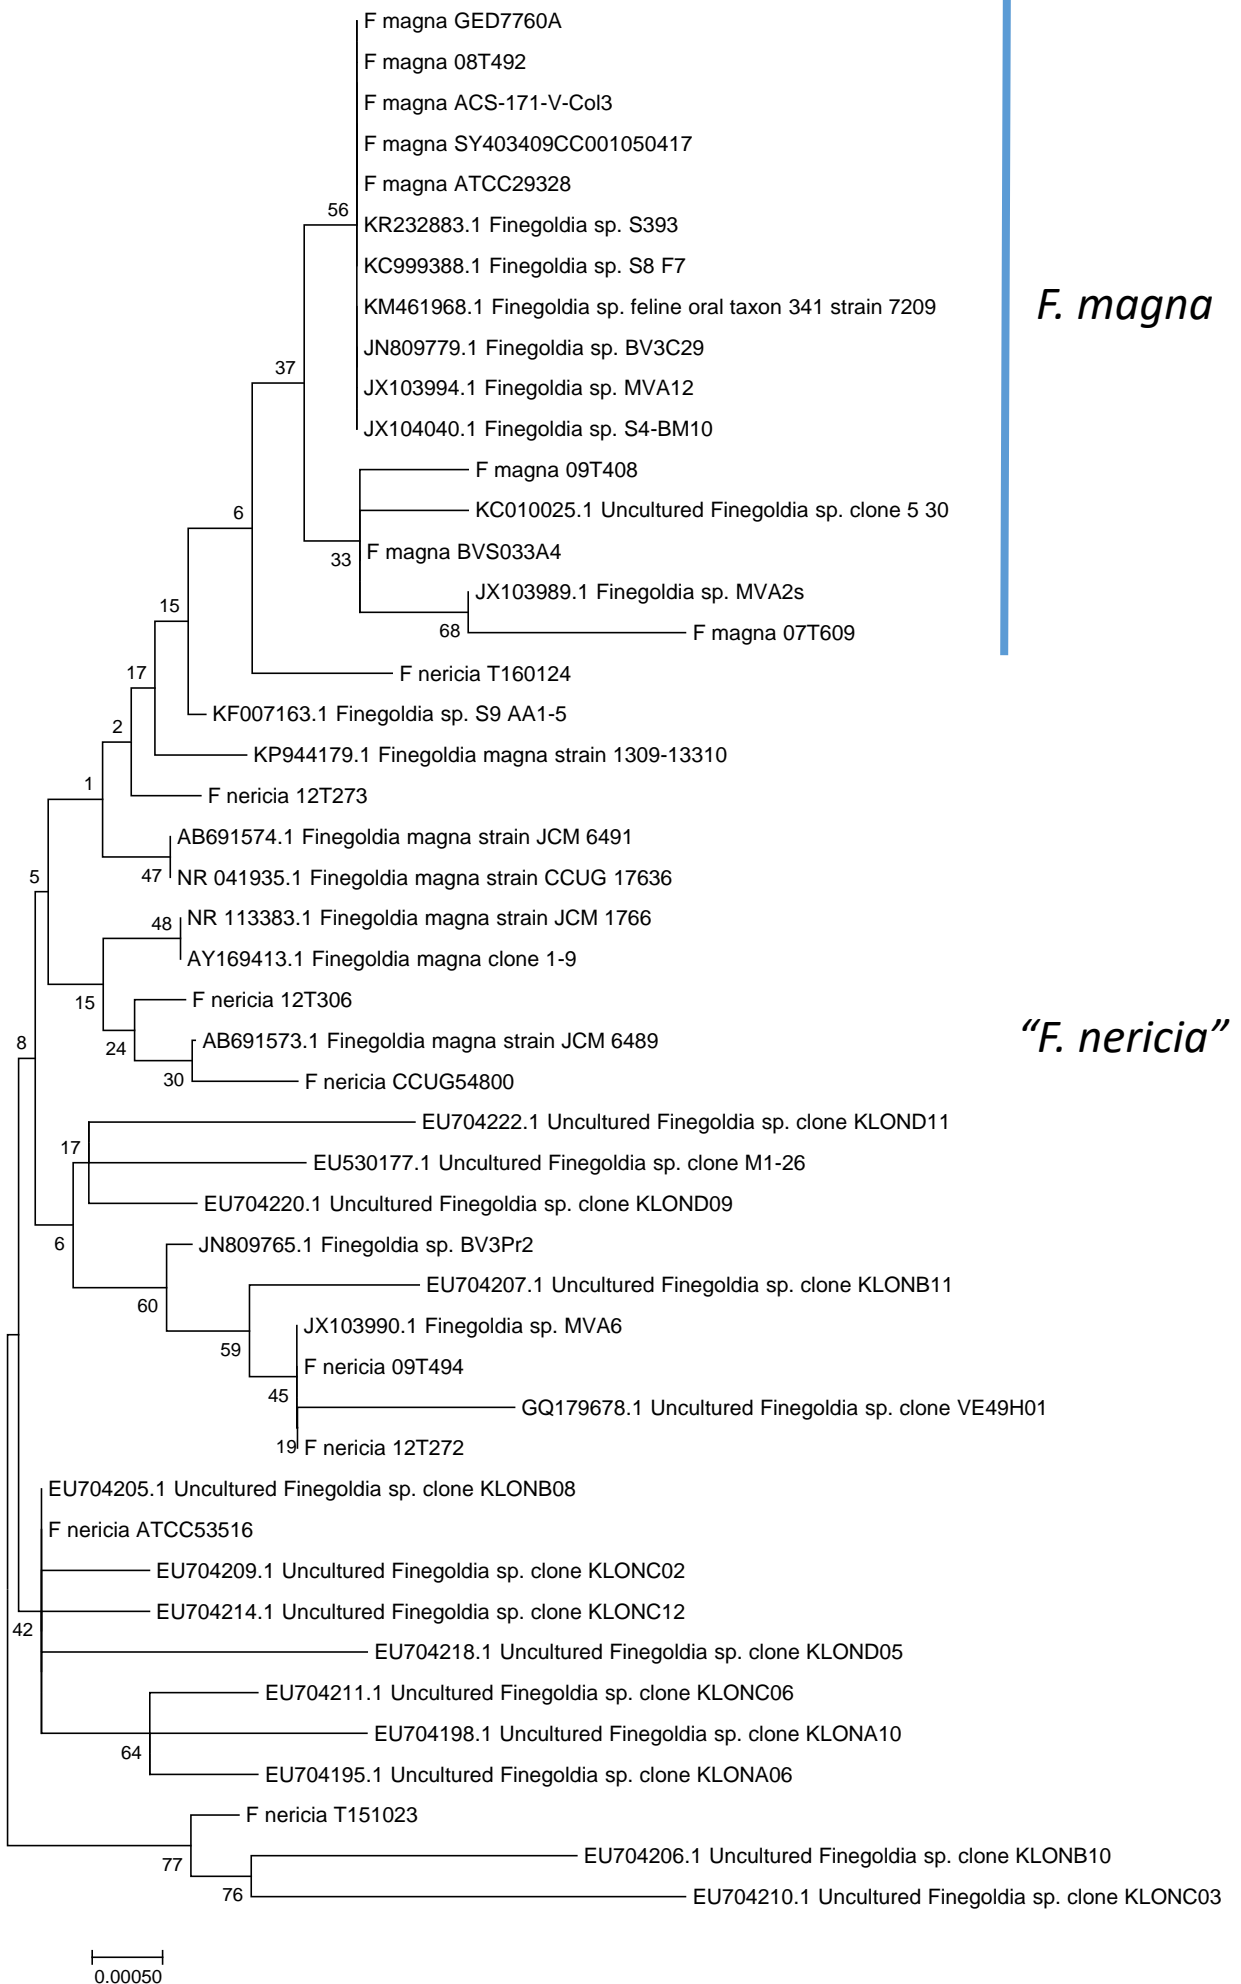

**Figure S2: Phylogenetic tree of 16S rDNA sequences of *Finegoldia* isolates extracted from GenBank**  
 All deposited 16S rDNA sequences assigned to *Finegoldia* were taken from GenBank that had a >85% overlap with the 16S rDNA sequence (*rrnA*) of ATCC29328. 47 sequences were compared. The phylogenetic analysis was done with MEGA7. The evolutionary history was inferred using the Neighbor-Joining method. The percentage of replicate trees in which the associated taxa clustered together in the bootstrap test (250 replicates) are shown next to the branches. The tree is drawn to scale, with branch lengths in the same units as those of the evolutionary distances used to infer the phylogenetic tree. The evolutionary distances were computed using the Maximum Composite Likelihood method and are in the units of the number of base substitutions per site.

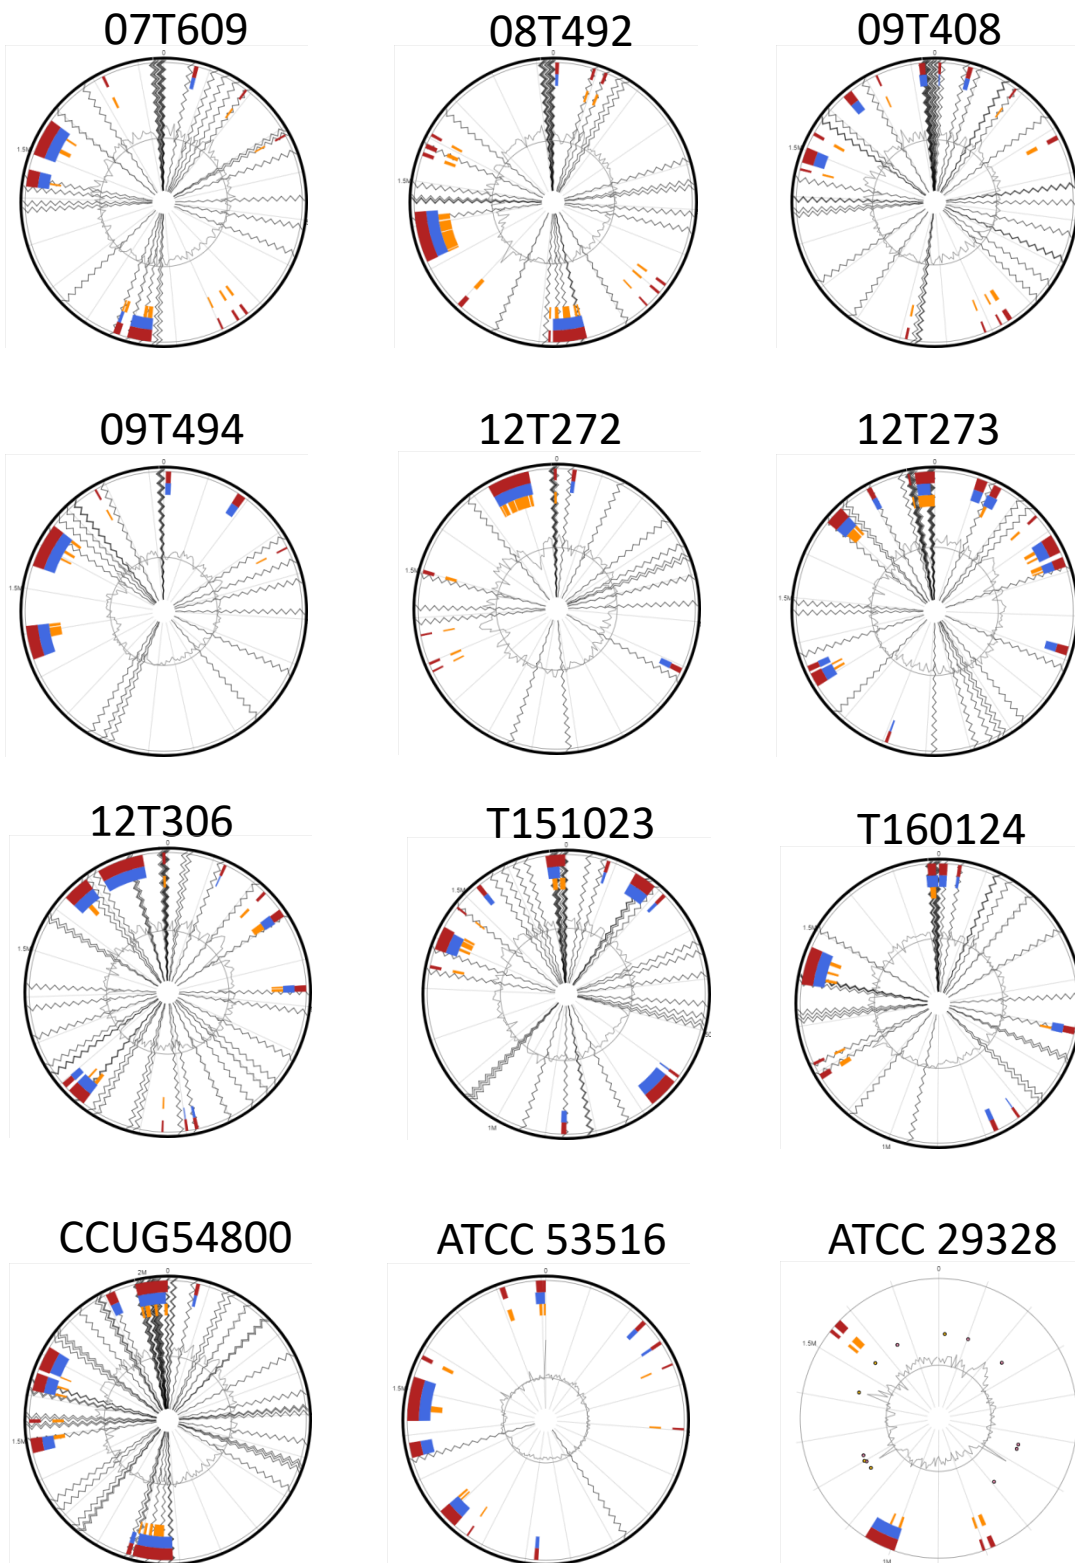

**Figure S3: Predicted genomic islands in *Finnegoldia* genomes**

All analyzed 12 *Finnegoldia* genomes contain predicted genomic islands, but with strain-specific differences. The color depicts the prediction method: blue, IslandPath-DIMOB; orange, SIGI-HMM and dark red, integrated. All genes found in these islands are shown in table S3.

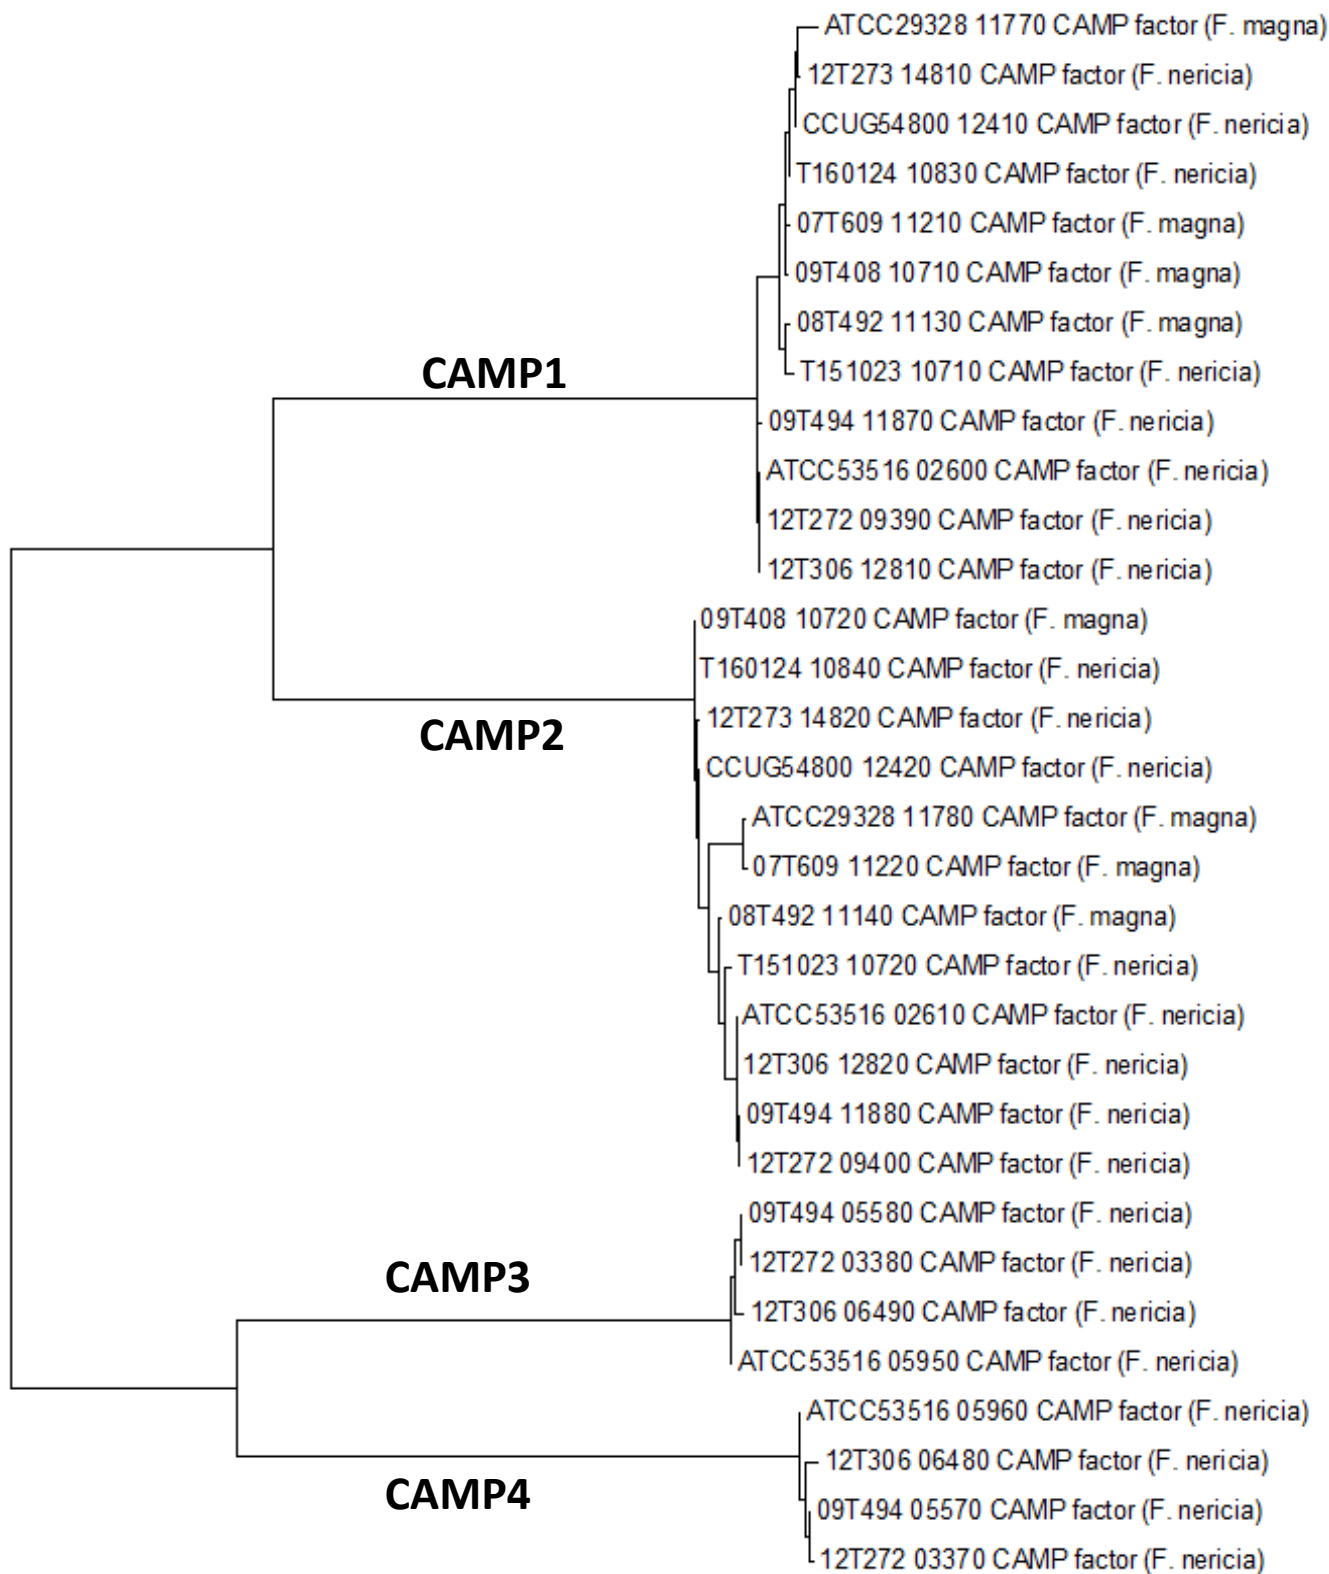

**Figure S4: Phylogenetic tree of all putative CAMP factors of *Fingoldia* strains**

Each strain possesses a least two distinct CAMP factors whose genes are in direct vicinity. Four out of seven "*F. nericia*" strains possess two additional CAMP factors; again, the genes are located next to each other. The tree was created in MEGA7, using the Maximum Likelihood method.

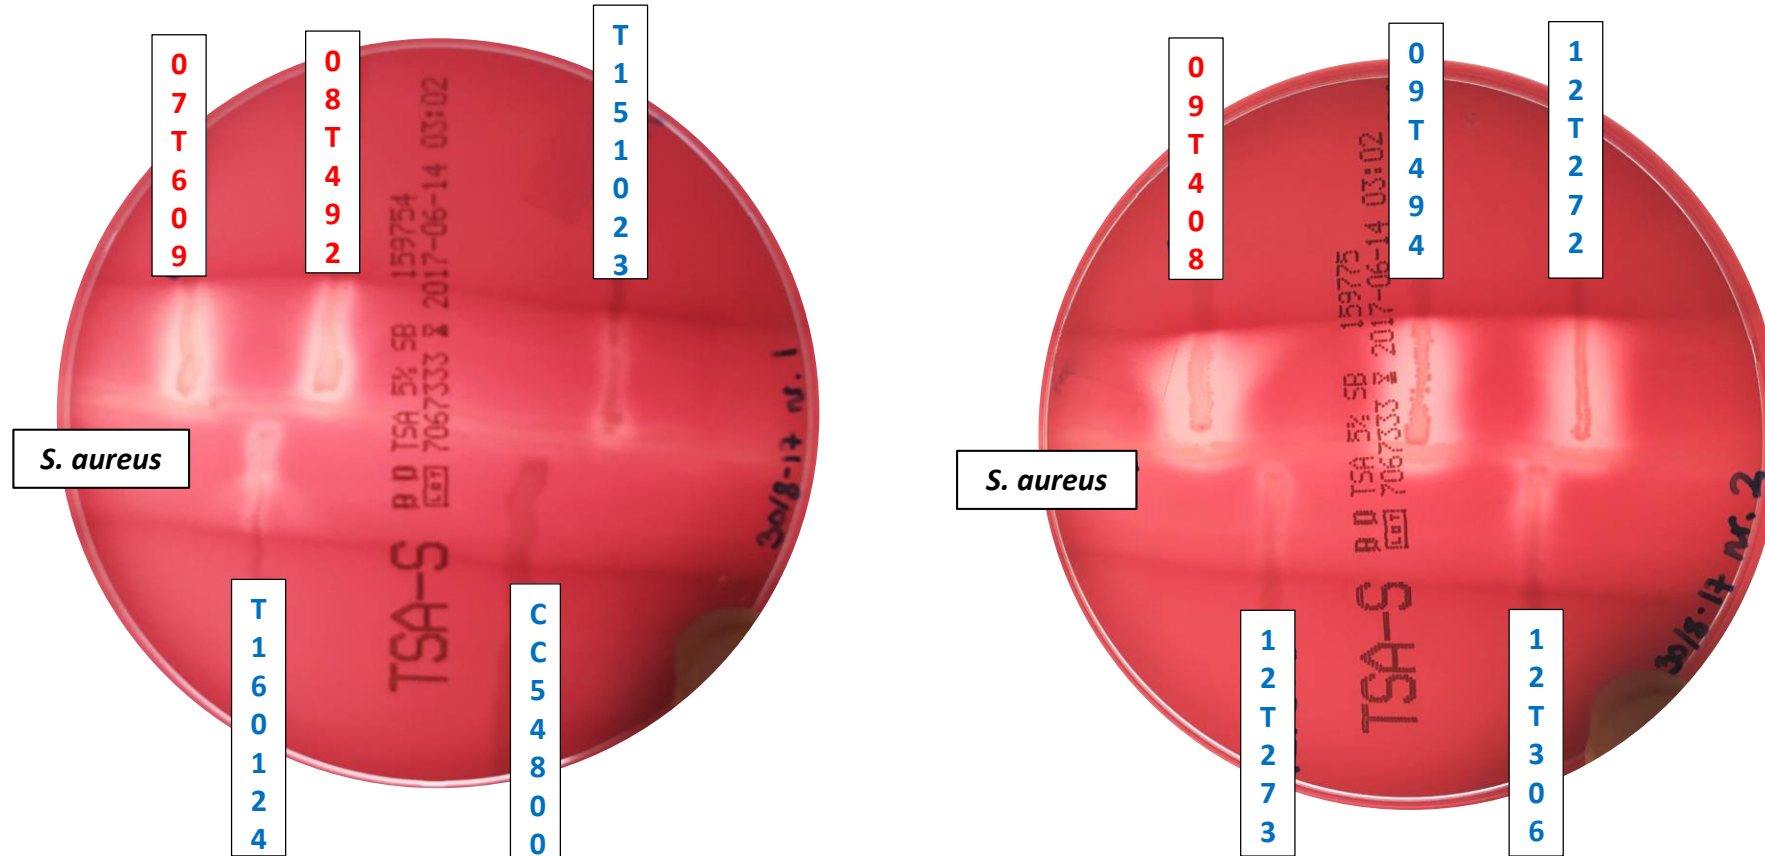

**Figure S5: CAMP reaction of *Finegoldia* sp. strains at elongated cultivation time**

TSA agar plates with 5% sheep blood was used. *Staphylococcus aureus* is inoculated in the middle streak. A positive CAMP test is indicated by complete erythrocyte lysis at the interface of the *Finegoldia* sp. and the *S. aureus* streaks. All three *F. magna* (in red) strains and two out of seven "*F. nericia*" (in blue) strains showed a strong positive CAMP reaction after five days of anaerobic incubation. One strain (CCUG54800) is negative in the CAMP reaction (see also Figure S6).

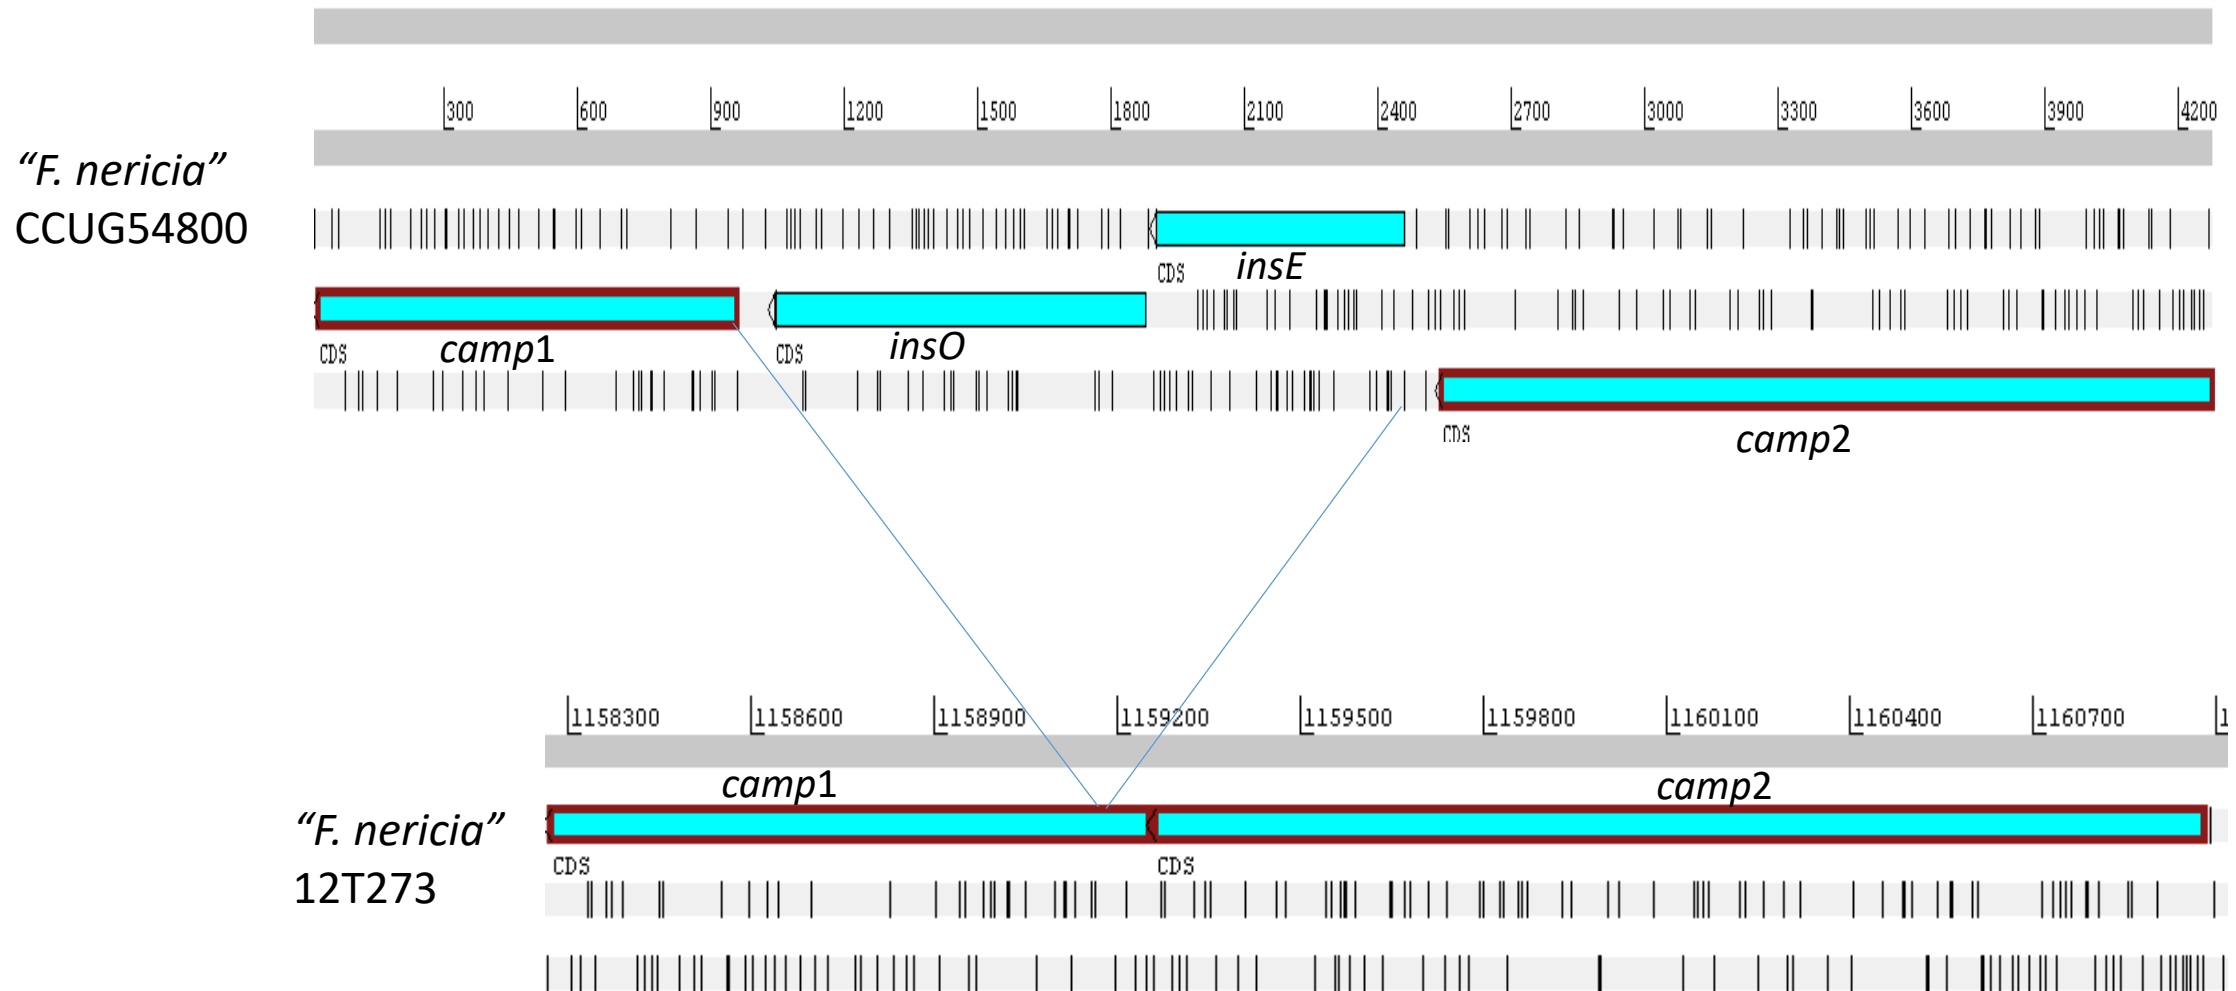

**Figure S6: Insertional inactivation of *camp1* in strain CCUG54800**

The genomic regions containing the *camp1* and the *camp2* gene in the “*F. nericia*” strains CCUG54800 and 12T273 are shown. A transposase-encoding mobile element is inserted in the 5’ end of *camp1* in strain CCUG54800.



**Table S1: Bidirectional blast of all coding sequences of 12 *Finleigola* genomes**  
 The program ProteinOrtho (version 4.26) was used with the following parameters: blast-*blastp* v2.24, E-value=1e-10, alg-*aln*=0.1, coverage=0.5, percent\_identity=25, adaptive\_similarity=0.95, inc\_pairs=1, inc\_singles=1, selfblast=1, unambiguous=0)  
 The Prokka annotation is shown. Highlighted in grey are the CDS with orthologs in all 12 genomes.

| Species | Protein | alg- <i>conn.</i> | Annotation                                                       | ATCC29328         | ATCC35516       | 077609       | 081492       | 097408       | 097494       | 127272       | 127273       | 127306       | CCUG54800       | T151023       | T160124       |
|---------|---------|-------------------|------------------------------------------------------------------|-------------------|-----------------|--------------|--------------|--------------|--------------|--------------|--------------|--------------|-----------------|---------------|---------------|
| #12     | 21125 - |                   |                                                                  |                   |                 |              |              |              |              |              |              |              |                 |               |               |
| 12      | 12      | 1                 | Chromosomal replication initiator protein DnaA                   | ATCC29328_00010   | ATCC35516_11280 | 077609_16840 | 081492_17540 | 097408_16640 | 097494_12190 | 127272_17700 | 127273_00730 | 127306_00150 | CCUG54800_18780 | T151023_00340 | T160124_16570 |
| 12      | 12      | 1                 | DNA polymerase III subunit beta                                  | ATCC29328_00020   | ATCC35516_11270 | 077609_16850 | 081492_17550 | 097408_16650 | 097494_12200 | 127272_17710 | 127273_00740 | 127306_00160 | CCUG54800_18790 | T151023_00350 | T160124_16580 |
| 12      | 12      | 1                 | ribosome-associated protein                                      | ATCC29328_00030   | ATCC35516_11260 | 077609_16860 | 081492_17560 | 097408_16660 | 097494_12210 | 127272_17720 | 127273_00750 | 127306_00170 | CCUG54800_18800 | T151023_00360 | T160124_16590 |
| 12      | 12      | 1                 | DNA replication and repair protein RecF                          | ATCC29328_00040   | ATCC35516_11250 | 077609_16870 | 081492_17570 | 097408_16670 | 097494_12220 | 127272_17730 | 127273_00760 | 127306_00180 | CCUG54800_18810 | T151023_00370 | T160124_16600 |
| 12      | 12      | 1                 | hypothetical protein                                             | ATCC29328_00050   | ATCC35516_11240 | 077609_16880 | 081492_17580 | 097408_16680 | 097494_12230 | 127272_17740 | 127273_00770 | 127306_00190 | CCUG54800_18820 | T151023_00380 | T160124_16610 |
| 12      | 12      | 1                 | DNA gyrase subunit B                                             | ATCC29328_00060   | ATCC35516_11230 | 077609_16890 | 081492_17590 | 097408_16690 | 097494_12240 | 127272_17750 | 127273_00780 | 127306_00200 | CCUG54800_18830 | T151023_00390 | T160124_16620 |
| 12      | 12      | 1                 | DNA gyrase subunit A                                             | ATCC29328_00070   | ATCC35516_11220 | 077609_16900 | 081492_17600 | 097408_16700 | 097494_12250 | 127272_17760 | 127273_00790 | 127306_00210 | CCUG54800_18840 | T151023_00400 | T160124_16630 |
| 12      | 12      | 1                 | Putative anti-sigma factor antagonist                            | ATCC29328_00080   | ATCC35516_11210 | 077609_16910 | 081492_17610 | 097408_16710 | 097494_12260 | 127272_17770 | 127273_00800 | 127306_00220 | CCUG54800_18850 | T151023_00410 | T160124_16640 |
| 12      | 12      | 1                 | serine protein kinase RsbW                                       | ATCC29328_00090   | ATCC35516_11200 | 077609_16920 | 081492_17620 | 097408_16720 | 097494_12270 | 127272_17780 | 127273_00810 | 127306_00230 | CCUG54800_18860 | T151023_00420 | T160124_16650 |
| 24      | 0.167   | 1                 | RNA polymerase sigma factor SigF                                 | ATCC29328_00100   | ATCC35516_11600 | 077609_00300 | 081492_00850 | 097408_00820 | 097494_00940 | 127272_00900 | 127273_00740 | 127306_01010 | CCUG54800_18870 | T151023_00580 | T160124_16660 |
| 12      | 12      | 1                 | Glutamine synthetase ATP-binding protein GlnA                    | ATCC29328_00110   | ATCC35516_11190 | 077609_16940 | 081492_17640 | 097408_16740 | 097494_12280 | 127272_17790 | 127273_00820 | 127306_00240 | CCUG54800_18880 | T151023_00440 | T160124_16670 |
| 12      | 12      | 1                 | hypothetical protein                                             | ATCC29328_00120   | ATCC35516_11170 | 077609_16950 | 081492_17650 | 097408_16750 | 097494_12290 | 127272_17800 | 127273_00830 | 127306_00250 | CCUG54800_18890 | T151023_00450 | T160124_16680 |
| 24      | 0.167   | 1                 | Fumarate hydratase class II                                      | ATCC29328_00130   | ATCC35516_10520 | 077609_05000 | 081492_00760 | 097408_05110 | 097494_05880 | 127272_03880 | 127273_00850 | 127306_00260 | CCUG54800_18900 | T151023_00460 | T160124_16690 |
| 12      | 12      | 1                 | hypothetical protein                                             | ATCC29328_00140   | ATCC35516_11150 | 077609_16970 | 081492_17670 | 097408_16770 | 097494_12300 | 127272_17810 | 127273_00860 | 127306_00270 | CCUG54800_18910 | T151023_00470 | T160124_16700 |
| 6       | 7       | 0.241             | Acetyltransferase (GNAT) family protein                          | ATCC29328_00150   | ATCC35516_11140 | 077609_16980 | 081492_17680 | 097408_16780 | 097494_12310 | 127272_17820 | 127273_00870 | 127306_00280 | CCUG54800_18920 | T151023_00480 | T160124_16710 |
| 12      | 12      | 1                 | hypothetical protein                                             | ATCC29328_00160   | ATCC35516_11130 | 077609_16990 | 081492_17690 | 097408_16790 | 097494_12320 | 127272_17830 | 127273_00880 | 127306_00290 | CCUG54800_18930 | T151023_00490 | T160124_16720 |
| 12      | 12      | 1                 | hypothetical protein                                             | ATCC29328_00170   | ATCC35516_11120 | 077609_17000 | 081492_17700 | 097408_16800 | 097494_12330 | 127272_17840 | 127273_00890 | 127306_00300 | CCUG54800_18940 | T151023_00500 | T160124_16730 |
| 7       | 7       | 1                 | YdcA-like protein                                                | ATCC29328_00180   | ATCC35516_11110 | 077609_17010 | 081492_17710 | 097408_16810 | 097494_12340 | 127272_17850 | 127273_00900 | 127306_00310 | CCUG54800_18950 | T151023_00510 | T160124_16740 |
| 11      | 11      | 1                 | hypothetical protein                                             | ATCC29328_00190   | ATCC35516_11100 | 077609_17020 | 081492_17720 | 097408_16820 | 097494_12350 | 127272_17860 | 127273_00910 | 127306_00320 | CCUG54800_18960 | T151023_00520 | T160124_16750 |
| 11      | 11      | 1                 | hypothetical protein                                             | ATCC29328_00210   | ATCC35516_11090 | 077609_17030 | 081492_17730 | 097408_16830 | 097494_12360 | 127272_17870 | 127273_00920 | 127306_00330 | CCUG54800_18970 | T151023_00530 | T160124_16760 |
| 12      | 12      | 1                 | hypothetical protein                                             | ATCC29328_00220   | ATCC35516_11080 | 077609_17040 | 081492_17740 | 097408_16840 | 097494_12370 | 127272_17880 | 127273_00930 | 127306_00340 | CCUG54800_18980 | T151023_00540 | T160124_16770 |
| 12      | 12      | 1                 | hypothetical protein                                             | ATCC29328_00230   | ATCC35516_11070 | 077609_17050 | 081492_17750 | 097408_16850 | 097494_12380 | 127272_17890 | 127273_00940 | 127306_00350 | CCUG54800_18990 | T151023_00550 | T160124_16780 |
| 12      | 12      | 1                 | hypothetical protein                                             | ATCC29328_00240   | ATCC35516_11060 | 077609_17060 | 081492_17760 | 097408_16860 | 097494_12390 | 127272_17900 | 127273_00950 | 127306_00360 | CCUG54800_19000 | T151023_00560 | T160124_16790 |
| 12      | 12      | 1                 | Yvi protein family protein                                       | ATCC29328_00250   | ATCC35516_11050 | 077609_17070 | 081492_17770 | 097408_16870 | 097494_12400 | 127272_17910 | 127273_00960 | 127306_00370 | CCUG54800_19010 | T151023_00570 | T160124_16800 |
| 12      | 12      | 19.123            | High-affinity zinc uptake system binding-protein ATCC29328_00260 | ATCC29328_00260   | ATCC35516_11040 | 077609_17080 | 081492_17780 | 097408_16880 | 097494_12410 | 127272_17920 | 127273_00970 | 127306_00380 | CCUG54800_19020 | T151023_00580 | T160124_16810 |
| 7       | 7       | 1                 | High-affinity zinc uptake system ATP-binding protein             | ATCC29328_00270   | ATCC35516_11030 | 077609_17090 | 081492_17790 | 097408_16890 | 097494_12420 | 127272_17930 | 127273_00980 | 127306_00390 | CCUG54800_19030 | T151023_00590 | T160124_16820 |
| 7       | 7       | 1                 | High-affinity zinc uptake system membrane protein                | ATCC29328_00280   | ATCC35516_11020 | 077609_17100 | 081492_17800 | 097408_16900 | 097494_12430 | 127272_17940 | 127273_00990 | 127306_00400 | CCUG54800_19040 | T151023_00600 | T160124_16830 |
| 7       | 7       | 1                 | hypothetical protein                                             | ATCC29328_00290   | ATCC35516_10990 | 077609_17110 | 081492_17810 | 097408_16910 | 097494_12440 | 127272_17950 | 127273_01000 | 127306_00410 | CCUG54800_19050 | T151023_00610 | T160124_16840 |
| 4       | 4       | 1                 | hypothetical protein                                             | ATCC29328_00300   | ATCC35516_10980 | 077609_17120 | 081492_17820 | 097408_16920 | 097494_12450 | 127272_17960 | 127273_01010 | 127306_00420 | CCUG54800_19060 | T151023_00620 | T160124_16850 |
| 12      | 12      | 1                 | Transglutaminase-like superfamily protein                        | ATCC29328_00310   | ATCC35516_10970 | 077609_17130 | 081492_17830 | 097408_16930 | 097494_12460 | 127272_17970 | 127273_01020 | 127306_00430 | CCUG54800_19070 | T151023_00630 | T160124_16860 |
| 12      | 12      | 1                 | molibdopterine biosynthesis-like protein MoxZ                    | ATCC29328_00320   | ATCC35516_10960 | 077609_17140 | 081492_17840 | 097408_16940 | 097494_12470 | 127272_17980 | 127273_01030 | 127306_00440 | CCUG54800_19080 | T151023_00640 | T160124_16870 |
| 12      | 12      | 1                 | (Hw) antiporter NhaP2                                            | ATCC29328_00330   | ATCC35516_10950 | 077609_17150 | 081492_17850 | 097408_16950 | 097494_12480 | 127272_17990 | 127273_01040 | 127306_00450 | CCUG54800_19090 | T151023_00650 | T160124_16880 |
| 12      | 12      | 17.048            | Ferrous-iron efflux pump FieF                                    | ATCC29328_00340   | ATCC35516_10940 | 077609_17160 | 081492_17860 | 097408_16960 | 097494_12490 | 127272_18000 | 127273_01050 | 127306_00460 | CCUG54800_19100 | T151023_00660 | T160124_16890 |
| 12      | 12      | 1                 | PAP2 superfamily protein                                         | ATCC29328_00350   | ATCC35516_10930 | 077609_17170 | 081492_17870 | 097408_16970 | 097494_12500 | 127272_18010 | 127273_01060 | 127306_00470 | CCUG54800_19110 | T151023_00670 | T160124_16900 |
| 8       | 8       | 1                 | hypothetical protein                                             | ATCC29328_00360   | ATCC35516_10920 | 077609_17180 | 081492_17880 | 097408_16980 | 097494_12510 | 127272_18020 | 127273_01070 | 127306_00480 | CCUG54800_19120 | T151023_00680 | T160124_16910 |
| 12      | 12      | 1                 | Thiamine precursor transporter HmpT                              | ATCC29328_00370   | ATCC35516_10910 | 077609_17190 | 081492_17890 | 097408_16990 | 097494_12520 | 127272_18030 | 127273_01080 | 127306_00490 | CCUG54800_19130 | T151023_00690 | T160124_16920 |
| 9       | 9       | 1                 | Ph-type protease precursor                                       | ATCC29328_00380   | ATCC35516_10900 | 077609_17200 | 081492_17900 | 097408_17000 | 097494_12530 | 127272_18040 | 127273_01090 | 127306_00500 | CCUG54800_19140 | T151023_00700 | T160124_16930 |
| 1       | 1       | 1                 | N-acetylmuramoyl-L-alanine amidase LytC pre                      | ATCC29328_00390   | ATCC35516_10890 | 077609_17210 | 081492_17910 | 097408_17010 | 097494_12540 | 127272_18050 | 127273_01100 | 127306_00510 | CCUG54800_19150 | T151023_00710 | T160124_16940 |
| 12      | 12      | 1                 | CnaB-type D-type domain protein                                  | ATCC29328_00400   | ATCC35516_10880 | 077609_17220 | 081492_17920 | 097408_17020 | 097494_12550 | 127272_18060 | 127273_01110 | 127306_00520 | CCUG54800_19160 | T151023_00720 | T160124_16950 |
| 12      | 12      | 1                 | Putative small multi-drug export protein                         | ATCC29328_00410   | ATCC35516_10870 | 077609_17230 | 081492_17930 | 097408_17030 | 097494_12560 | 127272_18070 | 127273_01120 | 127306_00530 | CCUG54800_19170 | T151023_00730 | T160124_16960 |
| 12      | 12      | 1                 | Phosphoenolpyruvate carboxyltransferase                          | ATCC29328_00420   | ATCC35516_10860 | 077609_17240 | 081492_17940 | 097408_17040 | 097494_12570 | 127272_18080 | 127273_01130 | 127306_00540 | CCUG54800_19180 | T151023_00740 | T160124_16970 |
| 12      | 12      | 1                 | Oligonucleotide 2                                                | ATCC29328_00430   | ATCC35516_10850 | 077609_17250 | 081492_17950 | 097408_17050 | 097494_12580 | 127272_18090 | 127273_01140 | 127306_00550 | CCUG54800_19190 | T151023_00750 | T160124_16980 |
| 24      | 0.147   | 1                 | Oligonucleotide 5, Phosphatidyl                                  | ATCC29328_00440   | ATCC35516_10840 | 077609_17260 | 081492_17960 | 097408_17060 | 097494_12590 | 127272_18100 | 127273_01150 | 127306_00560 | CCUG54800_19200 | T151023_00760 | T160124_16990 |
| 12      | 12      | 1                 | Glutamine transport ATP-binding protein GlnA                     | ATCC29328_00450   | ATCC35516_10830 | 077609_17270 | 081492_17970 | 097408_17070 | 097494_12600 | 127272_18110 | 127273_01160 | 127306_00570 | CCUG54800_19210 | T151023_00770 | T160124_17000 |
| 12      | 12      | 1                 | hypothetical protein                                             | ATCC29328_00460   | ATCC35516_10820 | 077609_17280 | 081492_17980 | 097408_17080 | 097494_12610 | 127272_18120 | 127273_01170 | 127306_00580 | CCUG54800_19220 | T151023_00780 | T160124_17010 |
| 12      | 12      | 1                 | hypothetical protein                                             | ATCC29328_00470</ |                 |              |              |              |              |              |              |              |                 |               |               |











|    |          |   |                                                                         |                 |                 |             |             |             |             |             |             |              |                 |              |               |
|----|----------|---|-------------------------------------------------------------------------|-----------------|-----------------|-------------|-------------|-------------|-------------|-------------|-------------|--------------|-----------------|--------------|---------------|
| 12 | 12       | 1 | Hyd family secretin protein                                             | ATCC29328_06930 | ATCC53516_14030 | 07769_06220 | 08792_06070 | 09748_06310 | 09744_07250 | 12772_05020 | 12773_09890 | 127306_08090 | CCUG54800_07360 | T51023_06600 | T160124_06510 |
| 12 | 12       | 1 | Hydrolytic protein                                                      | ATCC29328_06940 | ATCC53516_14030 | 07769_06230 | 08792_06080 | 09748_06320 | 09744_07260 | 12772_05030 | 12773_09900 | 127306_08100 | CCUG54800_07370 | T51023_06610 | T160124_06520 |
| 12 | 12       | 1 | Cell division protein SepF                                              | ATCC29328_06950 | ATCC53516_14030 | 07769_06240 | 08792_06090 | 09748_06330 | 09744_07270 | 12772_05040 | 12773_09910 | 127306_08110 | CCUG54800_07380 | T51023_06620 | T160124_06530 |
| 12 | 12       | 1 | YGGT family protein                                                     | ATCC29328_06960 | ATCC53516_14030 | 07769_06250 | 08792_06100 | 09748_06340 | 09744_07280 | 12772_05050 | 12773_09920 | 127306_08120 | CCUG54800_07390 | T51023_06630 | T160124_06540 |
| 12 | 12       | 1 | Hydrolytic protein                                                      | ATCC29328_06970 | ATCC53516_14040 | 07769_06260 | 08792_06110 | 09748_06350 | 09744_07290 | 12772_05060 | 12773_09930 | 127306_08130 | CCUG54800_07400 | T51023_06640 | T160124_06550 |
| 12 | 12       | 1 | Lipotein signal peptidase                                               | ATCC29328_06980 | ATCC53516_14050 | 07769_06270 | 08792_06120 | 09748_06360 | 09744_07300 | 12772_05070 | 12773_09940 | 127306_08140 | CCUG54800_07410 | T51023_06650 | T160124_06560 |
| 12 | 12       | 1 | Uridine diphosphate-lyase                                               | ATCC29328_06990 | ATCC53516_14060 | 07769_06280 | 08792_06130 | 09748_06370 | 09744_07310 | 12772_05080 | 12773_09950 | 127306_08150 | CCUG54800_07420 | T51023_06660 | T160124_06570 |
| 12 | 13 0.141 | 1 | Putative endo-beta-N-acetylglucosaminidase                              | ATCC29328_07030 | ATCC29328_07030 | 07769_06320 | 08792_06140 | 09748_06380 | 09744_07360 | 12772_05120 | 12773_09990 | 127306_08190 | CCUG54800_07460 | T51023_06700 | T160124_06620 |
| 12 | 14 0.143 | 1 | Thrombospondin precursor                                                | ATCC29328_07040 | ATCC53516_14110 | 07769_06330 | 08792_06150 | 09748_06390 | 09744_07370 | 12772_05130 | 12773_10000 | 127306_08200 | CCUG54800_07470 | T51023_06710 | T160124_06630 |
| 12 | 12       | 1 | Thymopoietin                                                            | ATCC29328_07080 | ATCC53516_14150 | 07769_06370 | 08792_06220 | 09748_06430 | 09744_07410 | 12772_05170 | 12773_10040 | 127306_08240 | CCUG54800_07510 | T51023_06750 | T160124_06670 |
| 12 | 12       | 1 | Allyl hydroperoxidase reductase subunit C                               | ATCC29328_07090 | ATCC53516_14160 | 07769_06380 | 08792_06230 | 09748_06440 | 09744_07420 | 12772_05180 | 12773_10050 | 127306_08250 | CCUG54800_07520 | T51023_06760 | T160124_06680 |
| 12 | 12       | 1 | Nitroreductase family protein                                           | ATCC29328_07110 | ATCC53516_14180 | 07769_06400 | 08792_06250 | 09748_06470 | 09744_07440 | 12772_05200 | 12773_10070 | 127306_08270 | CCUG54800_07540 | T51023_06780 | T160124_06700 |
| 12 | 12       | 1 | Molybdate-binding periplasmic protein precu                             | ATCC29328_07120 | ATCC53516_14190 | 07769_06410 | 08792_06260 | 09748_06480 | 09744_07450 | 12772_05210 | 12773_10080 | 127306_08280 | CCUG54800_07550 | T51023_06790 | T160124_06710 |
| 12 | 12       | 1 | Molybdenum transport system permease prot                               | ATCC29328_07130 | ATCC53516_14200 | 07769_06420 | 08792_06270 | 09748_06490 | 09744_07460 | 12772_05220 | 12773_10090 | 127306_08290 | CCUG54800_07560 | T51023_06800 | T160124_06720 |
| 12 | 12       | 1 | Fe(3+) ions import ATP-binding protein FbpC                             | ATCC29328_07140 | ATCC53516_14210 | 07769_06430 | 08792_06280 | 09748_06500 | 09744_07470 | 12772_05230 | 12773_10100 | 127306_08300 | CCUG54800_07570 | T51023_06810 | T160124_06730 |
| 12 | 12       | 1 | Ribonuclease F                                                          | ATCC29328_07150 | ATCC53516_14220 | 07769_06440 | 08792_06290 | 09748_06510 | 09744_07480 | 12772_05240 | 12773_10110 | 127306_08310 | CCUG54800_07580 | T51023_06820 | T160124_06740 |
| 12 | 12       | 1 | SrA-binding protein                                                     | ATCC29328_07160 | ATCC53516_14230 | 07769_06450 | 08792_06300 | 09748_06520 | 09744_07490 | 12772_05250 | 12773_10120 | 127306_08320 | CCUG54800_07590 | T51023_06830 | T160124_06750 |
| 12 | 12       | 1 | Hydrolytic protein                                                      | ATCC29328_07170 | ATCC53516_14240 | 07769_06460 | 08792_06310 | 09748_06530 | 09744_07500 | 12772_05260 | 12773_10130 | 127306_08330 | CCUG54800_07600 | T51023_06840 | T160124_06760 |
| 12 | 12       | 1 | Hydrolytic protein                                                      | ATCC29328_07180 | ATCC53516_14250 | 07769_06470 | 08792_06320 | 09748_06540 | 09744_07510 | 12772_05270 | 12773_10140 | 127306_08340 | CCUG54800_07610 | T51023_06850 | T160124_06770 |
| 12 | 12       | 1 | Hydrolytic protein                                                      | ATCC29328_07190 | ATCC53516_14260 | 07769_06480 | 08792_06330 | 09748_06550 | 09744_07520 | 12772_05280 | 12773_10150 | 127306_08350 | CCUG54800_07620 | T51023_06860 | T160124_06780 |
| 12 | 12       | 1 | Guanylate kinase                                                        | ATCC29328_07200 | ATCC53516_14270 | 07769_06490 | 08792_06340 | 09748_06560 | 09744_07530 | 12772_05290 | 12773_10160 | 127306_08360 | CCUG54800_07630 | T51023_06870 | T160124_06790 |
| 12 | 12       | 1 | DNA-directed RNA polymerase subunit omega                               | ATCC29328_07210 | ATCC53516_14280 | 07769_06500 | 08792_06350 | 09748_06570 | 09744_07540 | 12772_05300 | 12773_10170 | 127306_08370 | CCUG54800_07640 | T51023_06880 | T160124_06800 |
| 12 | 12       | 1 | Coenzyme A biosynthesis bifunctional protein                            | ATCC29328_07220 | ATCC53516_14290 | 07769_06510 | 08792_06360 | 09748_06580 | 09744_07550 | 12772_05310 | 12773_10180 | 127306_08380 | CCUG54800_07650 | T51023_06890 | T160124_06810 |
| 12 | 12       | 1 | Primosomal protein W                                                    | ATCC29328_07230 | ATCC53516_14300 | 07769_06520 | 08792_06370 | 09748_06590 | 09744_07560 | 12772_05320 | 12773_10190 | 127306_08390 | CCUG54800_07660 | T51023_06900 | T160124_06820 |
| 12 | 12       | 1 | Peptide deformylase 1                                                   | ATCC29328_07240 | ATCC53516_14310 | 07769_06530 | 08792_06380 | 09748_06600 | 09744_07570 | 12772_05330 | 12773_10200 | 127306_08400 | CCUG54800_07670 | T51023_06910 | T160124_06830 |
| 12 | 12       | 1 | Methionyl-tRNA formyltransferase                                        | ATCC29328_07250 | ATCC53516_14320 | 07769_06540 | 08792_06390 | 09748_06610 | 09744_07580 | 12772_05340 | 12773_10210 | 127306_08410 | CCUG54800_07680 | T51023_06920 | T160124_06840 |
| 12 | 12       | 1 | Putative nuclear zinc metalloproteinase                                 | ATCC29328_07260 | ATCC53516_14330 | 07769_06550 | 08792_06400 | 09748_06620 | 09744_07590 | 12772_05350 | 12773_10220 | 127306_08420 | CCUG54800_07690 | T51023_06930 | T160124_06850 |
| 12 | 12       | 1 | Ribosomal RNA small subunit methyltransferase                           | ATCC29328_07270 | ATCC53516_14340 | 07769_06560 | 08792_06410 | 09748_06630 | 09744_07600 | 12772_05360 | 12773_10230 | 127306_08430 | CCUG54800_07700 | T51023_06940 | T160124_06860 |
| 12 | 12       | 1 | Putative DNA-specific RNA methyltransferase                             | ATCC29328_07280 | ATCC53516_14350 | 07769_06570 | 08792_06420 | 09748_06640 | 09744_07610 | 12772_05370 | 12773_10240 | 127306_08440 | CCUG54800_07710 | T51023_06950 | T160124_06870 |
| 12 | 24 0.167 | 1 | Serine/threonine phosphatase stp                                        | ATCC29328_07290 | ATCC29328_07290 | 07769_07069 | 08792_07200 | 09748_07069 | 09744_07440 | 12772_05370 | 12773_11070 | 127306_09280 | CCUG54800_07720 | T51023_06950 | T160124_06870 |
| 12 | 12       | 1 | Serine/threonine-protein kinase PkcK                                    | ATCC29328_07300 | ATCC53516_14370 | 07769_06590 | 08792_06440 | 09748_06650 | 09744_07620 | 12772_05380 | 12773_10260 | 127306_08460 | CCUG54800_07730 | T51023_06970 | T160124_06890 |
| 12 | 12       | 1 | Putative ribosome biogenesis GTPase RgaA                                | ATCC29328_07310 | ATCC53516_14380 | 07769_06600 | 08792_06450 | 09748_06670 | 09744_07630 | 12772_05400 | 12773_10270 | 127306_08470 | CCUG54800_07740 | T51023_06980 | T160124_06900 |
| 12 | 12       | 1 | Ribonuclease 3 primimerase                                              | ATCC29328_07320 | ATCC53516_14390 | 07769_06610 | 08792_06460 | 09748_06680 | 09744_07640 | 12772_05420 | 12773_10290 | 127306_08490 | CCUG54800_07750 | T51023_06990 | T160124_06910 |
| 12 | 12       | 1 | Thiamine transporter TH1                                                | ATCC29328_07330 | ATCC53516_14400 | 07769_06620 | 08792_06470 | 09748_06690 | 09744_07650 | 12772_05440 | 12773_10300 | 127306_08490 | CCUG54800_07760 | T51023_07000 | T160124_06920 |
| 12 | 12       | 1 | Thiamine pyrophosphokinase                                              | ATCC29328_07340 | ATCC53516_14410 | 07769_06630 | 08792_06480 | 09748_06700 | 09744_07660 | 12772_05440 | 12773_10300 | 127306_08500 | CCUG54800_07770 | T51023_07010 | T160124_06930 |
| 12 | 12       | 1 | SOS ribosomal protein L28                                               | ATCC29328_07350 | ATCC53516_14420 | 07769_06640 | 08792_06490 | 09748_06710 | 09744_07670 | 12772_05440 | 12773_10310 | 127306_08510 | CCUG54800_07780 | T51023_07020 | T160124_06940 |
| 12 | 12       | 1 | Alkaline shock-protein 23                                               | ATCC29328_07360 | ATCC53516_14430 | 07769_06650 | 08792_06500 | 09748_06720 | 09744_07680 | 12772_05450 | 12773_10320 | 127306_08520 | CCUG54800_07790 | T51023_07030 | T160124_06950 |
| 12 | 12       | 1 | DACD domain protein                                                     | ATCC29328_07370 | ATCC53516_14440 | 07769_06660 | 08792_06510 | 09748_06730 | 09744_07700 | 12772_05460 | 12773_10330 | 127306_08530 | CCUG54800_07800 | T51023_07040 | T160124_06960 |
| 12 | 12       | 1 | ATP-dependent DNA helicase RecG                                         | ATCC29328_07380 | ATCC53516_14450 | 07769_06670 | 08792_06520 | 09748_06740 | 09744_07710 | 12772_05470 | 12773_10340 | 127306_08540 | CCUG54800_07810 | T51023_07050 | T160124_06970 |
| 12 | 12       | 1 | Ribosomal RNA small subunit methyltransferase                           | ATCC29328_07390 | ATCC53516_14460 | 07769_06680 | 08792_06530 | 09748_06750 | 09744_07720 | 12772_05480 | 12773_10350 | 127306_08550 | CCUG54800_07820 | T51023_07060 | T160124_06980 |
| 12 | 12       | 1 | Ribonucleoproteine adenylyltransferase                                  | ATCC29328_07400 | ATCC53516_14470 | 07769_06690 | 08792_06540 | 09748_06760 | 09744_07730 | 12772_05490 | 12773_10360 | 127306_08560 | CCUG54800_07830 | T51023_07070 | T160124_06990 |
| 12 | 12       | 1 | Hydrolytic protein                                                      | ATCC29328_07410 | ATCC53516_14480 | 07769_06700 | 08792_06550 | 09748_06770 | 09744_07740 | 12772_05500 | 12773_10370 | 127306_08570 | CCUG54800_07840 | T51023_07080 | T160124_07000 |
| 12 | 12       | 1 | Flavodoxin                                                              | ATCC29328_07420 | ATCC53516_14490 | 07769_06710 | 08792_06560 | 09748_06780 | 09744_07750 | 12772_05510 | 12773_10380 | 127306_08580 | CCUG54800_07850 | T51023_07090 | T160124_07010 |
| 12 | 12       | 1 | Hydrolytic protein                                                      | ATCC29328_07430 | ATCC53516_14500 | 07769_06720 | 08792_06570 | 09748_06790 | 09744_07760 | 12772_05520 | 12773_10390 | 127306_08590 | CCUG54800_07860 | T51023_07100 | T160124_07020 |
| 12 | 12       | 1 | preprotein translocase subunit SecE                                     | ATCC29328_07440 | ATCC53516_14510 | 07769_06730 | 08792_06580 | 09748_06800 | 09744_07770 | 12772_05530 | 12773_10400 | 127306_08600 | CCUG54800_07870 | T51023_07110 | T160124_07030 |
| 12 | 12       | 1 | Putative H <sub>2</sub> O <sub>2</sub> -stimulated pyrophosphate energy | ATCC29328_07450 | ATCC53516_14520 | 07769_06740 | 08792_06590 | 09748_06810 | 09744_07780 | 12772_05540 | 12773_10410 | 127306_08610 | CCUG54800_07880 | T51023_07120 | T160124_07040 |
| 12 | 13 0.141 | 1 | Magnesium and cobalt efflux protein CorC                                | ATCC29328_07460 | ATCC53516_14530 | 07769_06750 | 08792_06600 | 09748_06820 | 09744_07790 | 12772_05550 | 12773_10420 | 127306_08640 | CCUG54800_07890 | T51023_07130 | T160124_07050 |
| 12 | 12       | 1 | Methionine aminopeptidase 1                                             | ATCC29328_07470 | ATCC53516_14540 | 07769_06760 | 08792_06610 | 09748_06830 | 09744_07800 | 12772_05560 | 12773_10430 | 127306_08650 | CCUG54800_07900 | T51023_07140 | T160124_07060 |
| 12 | 12       | 1 | Hydrolytic protein                                                      | ATCC29328_07480 | ATCC53516_14550 | 07769_06770 | 08792_06620 | 09748_06840 | 09744_07810 | 12772_05570 | 12773_10440 | 127306_08660 | CCUG54800_07910 | T51023_07150 | T160124_07070 |
| 12 | 12       | 1 | Hydrolytic protein                                                      | ATCC29328_07490 | ATCC53516_14560 | 07769_06780 | 08792_06630 | 09748_06850 | 09744_07820 | 12772_05580 | 12773_10450 | 127306_08670 | CCUG54800_07920 | T51023_07160 | T160124_07080 |
| 12 | 12       | 1 | Hydrolytic protein                                                      | ATCC29328_07500 | ATCC53516_14570 | 07769_06790 | 08792_06640 | 09748_06860 | 09744_07830 | 12772_05590 | 12773_10460 | 127306_08680 | CCUG54800_07930 | T51023_07170 | T160124_07090 |
| 12 | 12       | 1 | Hydrolytic protein                                                      | ATCC29328_07510 | ATCC53516_14580 | 07769_06800 | 08792_06650 | 09748_06870 | 09744_07840 | 12772_05600 | 12773_10470 | 127306_08690 | CCUG54800_07940 |              |               |



|    |       |   |                                                     |                           |                                 |                         |                         |                         |                         |                         |                         |                                 |                           |                             |
|----|-------|---|-----------------------------------------------------|---------------------------|---------------------------------|-------------------------|-------------------------|-------------------------|-------------------------|-------------------------|-------------------------|---------------------------------|---------------------------|-----------------------------|
| 12 | 12    | 1 | Positive regulator of sigmaE1, RseC/MucC            | ATCC29238_09240           | ATCC53516_16330                 | 07769_08530             | 08749_08830             | 09740_09570             | 12772_07340             | 12773_12220             | 12730_10450             | CCUG54800_09670                 | 151023_08910              | T160124_08830               |
| 12 | 12    | 1 | RNA threonylcarbamoylase dihydrolase                | ATCC29238_09250           | ATCC53516_16340                 | 07769_08540             | 08749_08840             | 09740_09580             | 12772_07350             | 12773_12230             | 12730_10460             | CCUG54800_09680                 | 151023_08920              | T160124_08840               |
| 12 | 12    | 1 | Aspartate tRNA ligase                               | ATCC29238_09260           | ATCC53516_16350                 | 07769_08550             | 08749_08850             | 09740_09590             | 12772_07360             | 12773_12240             | 12730_10470             | CCUG54800_09690                 | 151023_08930              | T160124_08850               |
| 12 | 12    | 1 | putative peptidoglycan biosynthesis protein N       | ATCC29238_09270           | ATCC53516_16360                 | 07769_08560             | 08749_08860             | 09740_09600             | 12772_07370             | 12773_12250             | 12730_10480             | CCUG54800_09700                 | 151023_08940              | T160124_08860               |
| 12 | 12    | 1 | carbohydrate diacid transcriptional activator C     | ATCC29238_09280           | ATCC53516_16370                 | 07769_08570             | 08749_08870             | 09740_09610             | 12772_07380             | 12773_12260             | 12730_10490             | CCUG54800_09710                 | 151023_08950              | T160124_08870               |
| 12 | 12    | 1 | Tetratricopeptide repeat protein                    | ATCC29238_09290           | ATCC53516_16380                 | 07769_08580             | 08749_08880             | 09740_09620             | 12772_07390             | 12773_12270             | 12730_10500             | CCUG54800_09720                 | 151023_08960              | T160124_08880               |
| 12 | 12    | 1 | hypothetical protein                                | ATCC29238_09300           | ATCC53516_16390                 | 07769_08590             | 08749_08890             | 09740_09630             | 12772_07400             | 12773_12280             | 12730_10510             | CCUG54800_09730                 | 151023_08970              | T160124_08890               |
| 12 | 12    | 1 | Arginine-tRNA ligase                                | ATCC29238_09310           | ATCC53516_16400                 | 07769_08600             | 08749_08900             | 09740_09640             | 12772_07410             | 12773_12290             | 12730_10520             | CCUG54800_09740                 | 151023_08980              | T160124_08900               |
| 12 | 12    | 1 | Endonuclease MutS2                                  | ATCC29238_09320           | ATCC53516_16410                 | 07769_08610             | 08749_08910             | 09740_09650             | 12772_07420             | 12773_12300             | 12730_10530             | CCUG54800_09750                 | 151023_08990              | T160124_08910               |
| 12 | 12    | 1 | putative protease YhdU precursor                    | ATCC29238_09330           | ATCC53516_16420                 | 07769_08620             | 08749_08920             | 09740_09660             | 12772_07430             | 12773_12310             | 12730_10540             | CCUG54800_09760                 | 151023_09000              | T160124_08920               |
| 12 | 12    | 1 | chromosome-segregation protein                      | ATCC29238_09340           | ATCC53516_16430                 | 07769_08630             | 08749_08930             | 09740_09670             | 12772_07440             | 12773_12320             | 12730_10550             | CCUG54800_09770                 | 151023_09010              | T160124_08930               |
| 12 | 12    | 1 | Phenylalanine-tRNA ligase beta subunit              | ATCC29238_09350           | ATCC53516_16440                 | 07769_08640             | 08749_08940             | 09740_09680             | 12772_07450             | 12773_12330             | 12730_10560             | CCUG54800_09780                 | 151023_09020              | T160124_08940               |
| 12 | 12    | 1 | Phenylalanine-tRNA ligase alpha subunit             | ATCC29238_09360           | ATCC53516_16450                 | 07769_08650             | 08749_08950             | 09740_09690             | 12772_07460             | 12773_12340             | 12730_10570             | CCUG54800_09790                 | 151023_09030              | T160124_08950               |
| 12 | 12    | 1 | Kir system potassium uptake protein A               | ATCC29238_09380           | ATCC53516_16490                 | 07769_08670             | 08749_08970             | 09740_09730             | 12772_07470             | 12773_12360             | 12730_10590             | CCUG54800_09810                 | 151023_09050              | T160124_08970               |
| 12 | 12    | 1 | Kir system potassium uptake protein B               | ATCC29238_09390           | ATCC53516_16500                 | 07769_08680             | 08749_08980             | 09740_09740             | 12772_07480             | 12773_12370             | 12730_10600             | CCUG54800_09820                 | 151023_09060              | T160124_08980               |
| 12 | 12    | 1 | Aspartate tRNA ligase                               | ATCC29238_09400           | ATCC53516_16510                 | 07769_08690             | 08749_08990             | 09740_09750             | 12772_07490             | 12773_12380             | 12730_10610             | CCUG54800_09830                 | 151023_09070              | T160124_08990               |
| 12 | 12    | 1 | Putative septation protein SpvG                     | ATCC29238_09410           | ATCC53516_16520                 | 07769_08700             | 08749_09000             | 09740_09760             | 12772_07500             | 12773_12390             | 12730_10620             | CCUG54800_09840                 | 151023_09080              | T160124_09000               |
| 12 | 12    | 1 | Processive diacylglycerol alpha-glucosyltransferase | ATCC29238_09420           | ATCC53516_16530                 | 07769_08710             | 08749_09010             | 09740_09770             | 12772_07510             | 12773_12400             | 12730_10630             | CCUG54800_09850                 | 151023_09090              | T160124_09010               |
| 12 | 12    | 1 | TVF38/TME46 family inner membrane prote             | ATCC29238_09430           | ATCC53516_16540                 | 07769_08720             | 08749_09020             | 09740_09780             | 12772_07520             | 12773_12410             | 12730_10640             | CCUG54800_09860                 | 151023_09100              | T160124_09020               |
| 12 | 12    | 1 | Alpha-monooxygenase/acylglucosyl synthase           | ATCC29238_09440           | ATCC53516_16550                 | 07769_08730             | 08749_09030             | 09740_09790             | 12772_07530             | 12773_12420             | 12730_10650             | CCUG54800_09870                 | 151023_09110              | T160124_09030               |
| 12 | 12    | 1 | hypothetical protein                                | ATCC29238_09450           | ATCC53516_16560                 | 07769_08740             | 08749_09040             | 09740_09800             | 12772_07540             | 12773_12430             | 12730_10660             | CCUG54800_09880                 | 151023_09120              | T160124_09040               |
| 12 | 12    | 1 | Redox-sensing transcriptional repressor Rex         | ATCC29238_09460           | ATCC53516_16570                 | 07769_08750             | 08749_09050             | 09740_09810             | 12772_07550             | 12773_12440             | 12730_10670             | CCUG54800_09890                 | 151023_09130              | T160124_09050               |
| 11 | 11    | 1 | Carbon starvation protein A                         | ATCC29238_09470           | ATCC53516_16580                 | 07769_08760             | 08749_09060             | 09740_09820             | 12772_07560             | 12773_12450             | 12730_10680             | CCUG54800_09900                 | 151023_09140              | T160124_09060               |
| 12 | 12    | 1 | chromosome-segregation protein                      | ATCC29238_09480           | ATCC53516_16590                 | 07769_08770             | 08749_09070             | 09740_09830             | 12772_07570             | 12773_12460             | 12730_10690             | CCUG54800_09910                 | 151023_09150              | T160124_09070               |
| 12 | 12    | 1 | Dihydrodipicolinate synthase                        | ATCC29238_09490           | ATCC53516_16600                 | 07769_08780             | 08749_09080             | 09740_09840             | 12772_07580             | 12773_12470             | 12730_10700             | CCUG54800_09920                 | 151023_09160              | T160124_09080               |
| 12 | 12    | 1 | phosphodiesterase                                   | ATCC29238_09500           | ATCC53516_16610                 | 07769_08790             | 08749_09090             | 09740_09850             | 12772_07590             | 12773_12480             | 12730_10710             | CCUG54800_09930                 | 151023_09170              | T160124_09090               |
| 12 | 12    | 1 | GTP cyclohydrolase 1                                | ATCC29238_09510           | ATCC53516_16620                 | 07769_08800             | 08749_09100             | 09740_09860             | 12772_07600             | 12773_12490             | 12730_10720             | CCUG54800_09940                 | 151023_09180              | T160124_09100               |
| 12 | 12    | 1 | hypothetical protein                                | ATCC29238_09520           | ATCC53516_16630                 | 07769_08810             | 08749_09110             | 09740_09870             | 12772_07610             | 12773_12500             | 12730_10730             | CCUG54800_09950                 | 151023_09190              | T160124_09110               |
| 12 | 12    | 1 | ETfase YnfJ                                         | ATCC29238_09530           | ATCC53516_16640                 | 07769_08820             | 08749_09120             | 09740_09880             | 12772_07620             | 12773_12510             | 12730_10740             | CCUG54800_09960                 | 151023_09200              | T160124_09120               |
| 12 | 12    | 1 | 60 kDa chaperonin                                   | ATCC29238_09540           | ATCC53516_16650                 | 07769_08830             | 08749_09130             | 09740_09890             | 12772_07630             | 12773_12520             | 12730_10750             | CCUG54800_09970                 | 151023_09210              | T160124_09130               |
| 12 | 12    | 1 | 10 kDa chaperonin                                   | ATCC29238_09550           | ATCC53516_16660                 | 07769_08840             | 08749_09140             | 09740_09900             | 12772_07640             | 12773_12530             | 12730_10760             | CCUG54800_09980                 | 151023_09220              | T160124_09140               |
| 12 | 12    | 1 | DNA-3-methyladenine glycosylase                     | ATCC29238_09560           | ATCC53516_16670                 | 07769_08850             | 08749_09150             | 09740_09910             | 12772_07650             | 12773_12540             | 12730_10770             | CCUG54800_09990                 | 151023_09230              | T160124_09150               |
| 12 | 12    | 1 | hypothetical protein                                | ATCC29238_09570           | ATCC53516_16680                 | 07769_08860             | 08749_09160             | 09740_09920             | 12772_07660             | 12773_12550             | 12730_10780             | CCUG54800_10000                 | 151023_09240              | T160124_09160               |
| 12 | 12    | 1 | Glycine-tRNA ligase                                 | ATCC29238_09580           | ATCC53516_16690                 | 07769_08870             | 08749_09170             | 09740_09930             | 12772_07670             | 12773_12560             | 12730_10790             | CCUG54800_10010                 | 151023_09250              | T160124_09170               |
| 12 | 12    | 1 | hypothetical protein                                | ATCC29238_09590           | ATCC53516_16700                 | 07769_08880             | 08749_09180             | 09740_09940             | 12772_07680             | 12773_12570             | 12730_10800             | CCUG54800_10020                 | 151023_09260              | T160124_09180               |
| 12 | 12    | 1 | Protoporphyrin diacylglyceryl transferase           | ATCC29238_09600           | ATCC53516_16710                 | 07769_08890             | 08749_09190             | 09740_09950             | 12772_07690             | 12773_12580             | 12730_10810             | CCUG54800_10030                 | 151023_09270              | T160124_09190               |
| 12 | 12    | 1 | transcriptional regulatory protein                  | ATCC29238_09610           | ATCC53516_16720                 | 07769_08900             | 08749_09200             | 09740_09960             | 12772_07700             | 12773_12590             | 12730_10820             | CCUG54800_10040                 | 151023_09280              | T160124_09200               |
| 12 | 12    | 1 | NH(3)-dependent NAD(+) synthetase                   | ATCC29238_09620           | ATCC53516_16730                 | 07769_08910             | 08749_09210             | 09740_09970             | 12772_07710             | 12773_12600             | 12730_10830             | CCUG54800_10050                 | 151023_09290              | T160124_09210               |
| 12 | 12    | 1 | IMPACT family member YnfZ                           | ATCC29238_09630           | ATCC53516_16740                 | 07769_08920             | 08749_09220             | 09740_09980             | 12772_07720             | 12773_12610             | 12730_10840             | CCUG54800_10060                 | 151023_09300              | T160124_09220               |
| 12 | 12    | 1 | Penicillin-binding protein 1A                       | ATCC29238_09650           | ATCC53516_16760                 | 07769_08940             | 08749_09240             | 09740_09990             | 12772_07740             | 12773_12630             | 12730_10860             | CCUG54800_10080                 | 151023_09320              | T160124_09250               |
| 6  | 0.271 | 5 | alkaline phosphatase synthesis transcriptional      | ATCC29238_09670           | ATCC53516_16780                 | 07769_08960             | 08749_09260             | 09740_10000             | 12772_07760             | 12773_12650             | 12730_10880             | CCUG54800_10100                 | 151023_09340              | T160124_09270               |
| 12 | 12    | 1 | LivABC system protein A                             | ATCC29238_09680           | ATCC53516_16880                 | 07769_08960             | 08749_09260             | 09740_10010             | 12772_07760             | 12773_12650             | 12730_10880             | CCUG54800_10100                 | 151023_09340              | T160124_09270               |
| 12 | 12    | 1 | LivABC system protein B                             | ATCC29238_09690           | ATCC53516_16890                 | 07769_08970             | 08749_09270             | 09740_10020             | 12772_07760             | 12773_12650             | 12730_10880             | CCUG54800_10100                 | 151023_09340              | T160124_09270               |
| 12 | 12    | 1 | Serine/threonine transporter SstT                   | ATCC29238_09700           | ATCC53516_16900                 | 07769_08980             | 08749_09280             | 09740_10030             | 12772_07760             | 12773_12650             | 12730_10880             | CCUG54800_10100                 | 151023_09340              | T160124_09270               |
| 12 | 12    | 1 | N-acetyltransferase II-alanine aminotransferase     | ATCC29238_09710           | ATCC53516_16950                 | 07769_08990             | 08749_09290             | 09740_10040             | 12772_07760             | 12773_12650             | 12730_10880             | CCUG54800_10100                 | 151023_09340              | T160124_09270               |
| 12 | 12    | 1 | Energy-coupled prolyl cis-trans isomerase C         | ATCC29238_09720           | ATCC53516_16960                 | 07769_09000             | 08749_09300             | 09740_10050             | 12772_07760             | 12773_12650             | 12730_10880             | CCUG54800_10100                 | 151023_09340              | T160124_09270               |
| 12 | 12    | 1 | hypothetical protein                                | ATCC29238_09730           | ATCC53516_16970                 | 07769_09010             | 08749_09310             | 09740_10060             | 12772_07760             | 12773_12650             | 12730_10880             | CCUG54800_10100                 | 151023_09340              | T160124_09270               |
| 12 | 12    | 1 | hypothetical protein                                | ATCC29238_09780           | ATCC53516_17030                 | 07769_09070             | 08749_09370             | 09740_10110             | 12772_07760             | 12773_12650             | 12730_10880             | CCUG54800_10100                 | 151023_09340              | T160124_09270               |
| 12 | 12    | 1 | Phosphate regulation sensor protein PhoSR           | ATCC29238_09790           | ATCC53516_17040                 | 07769_09080             | 08749_09380             | 09740_10120             | 12772_07760             | 12773_12650             | 12730_10880             | CCUG54800_10100                 | 151023_09340              | T160124_09270               |
| 12 | 12    | 1 | Sensory transduction protein regZ                   | ATCC29238_09800           | ATCC53516_17050                 | 07769_09090             | 08749_09390             | 09740_10130             | 12772_07760             | 12773_12650             | 12730_10880             | CCUG54800_10100                 | 151023_09340              | T160124_09270               |
| 24 | 0.167 | 6 | FtsX-like permease family protein                   | ATCC29238_09810,ATCC29232 | ATCC53516_17080,ATCC53516_17090 | 07769_09120,07769_09130 | 08749_09420,08749_09430 | 09740_10140,09740_10150 | 12772_08020,12772_08030 | 12773_12900,12773_12910 | 12730_11040,12730_11050 | CCUG54800_10320,CCUG54800_10330 | 151023_09520,151023_09530 | T160124_09520,T160124_09530 |
| 10 | 4     | 1 | hypothetical protein                                | ATCC29238_09840           | *                               | 07769_09130             | 08749_09430             | *                       | 12772_11560             | 12773_12650             | 12730_10900             | CCUG54800_10360                 | 151023_09360              | T160124_09280               |
| 10 | 4     | 1 | Ura1 domain phosphatase superfamily protein         | ATCC29238_09850           | *                               | 07769_09140             | 08749_09440             | *                       | 12772_11560             | 12773_12650             | 12730_10900             | CCUG54800_10360                 | 151023_09360              | T160124_09280               |
| 4  | 4     | 1 | hypothetical protein                                | ATCC29238_09860           | *                               | 07769_09150             | 08749_09450             | *                       | 12772_11560             | 12773_12650             | 12730_10900             | CCUG54800_10360                 | 151023_09360              | T160124_09280               |
| 4  | 4.0.5 | 1 | putative ABC transporter ATP-binding protein        | ATCC29238_09870           | *                               | 07769_09160             | 08749_09460             | *                       | *                       | *                       | *                       | *                               | *                         | *                           |
| 3  | 3     | 1 | putative ABC transporter permease protein           | ATCC29238_09880           | *                               | 07769_09170             | 08749_09470             | *                       | *                       | *                       | *                       | *                               | *                         | *                           |
| 2  | 2     | 1 | hypothetical protein                                | ATCC29238_09890           | *                               | 07769_09180             | 0874                    |                         |                         |                         |                         |                                 |                           |                             |



|    |       |       |                                                          |                 |                 |             |             |             |             |             |             |              |                 |              |               |
|----|-------|-------|----------------------------------------------------------|-----------------|-----------------|-------------|-------------|-------------|-------------|-------------|-------------|--------------|-----------------|--------------|---------------|
| 12 | 12    | 1     | UDP-N-acetylglucosaminyl-L-glucosamine reductase         | ATCC29328_11630 | ATCC53516_18630 | 07769_10990 | 08749_10990 | 09748_10990 | 09748_11660 | 12772_09120 | 12773_14590 | 127306_12600 | CCUG54800_12210 | 151023_10490 | T160124_10610 |
| 12 | 12    | 1     | Folylpolyglutamate synthase                              | ATCC29328_11630 | ATCC53516_18630 | 07769_10990 | 08749_10990 | 09748_10990 | 09748_11660 | 12772_09120 | 12773_14590 | 127306_12600 | CCUG54800_12210 | 151023_10490 | T160124_10610 |
| 24 | 0.167 | 1     | Peptide chain release factor 1                           | ATCC29328_11540 | ATCC29328_11540 | 07769_10990 | 08749_10990 | 09748_10990 | 09748_11660 | 12772_09120 | 12773_14590 | 127306_12600 | CCUG54800_12210 | 151023_10490 | T160124_10610 |
| 12 | 12    | 1     | Release factor glutamine methyltransferase               | ATCC29328_11550 | ATCC53516_18640 | 07769_11020 | 08749_10940 | 09748_10330 | 09748_11660 | 12772_09150 | 12773_14620 | 127306_12630 | CCUG54800_12230 | 151023_10520 | T160124_10640 |
| 12 | 12    | 1     | hypothetical protein                                     | ATCC29328_11560 | ATCC53516_18650 | 07769_11030 | 08749_10540 | 09748_10940 | 09748_11660 | 12772_09150 | 12773_14620 | 127306_12630 | CCUG54800_12230 | 151023_10520 | T160124_10640 |
| 12 | 12    | 1     | S05 ribosomal protein L31                                | ATCC29328_11570 | ATCC53516_18660 | 07769_11040 | 08749_10980 | 09748_10550 | 09748_11660 | 12772_09150 | 12773_14620 | 127306_12630 | CCUG54800_12230 | 151023_10520 | T160124_10640 |
| 12 | 12    | 1     | hypothetical protein                                     | ATCC29328_11580 | ATCC53516_18670 | 07769_11050 | 08749_10980 | 09748_10550 | 09748_11660 | 12772_09150 | 12773_14620 | 127306_12630 | CCUG54800_12230 | 151023_10520 | T160124_10640 |
| 12 | 12    | 1     | Thio-disulfide interchange protein Dsb precu             | ATCC29328_11590 | ATCC53516_18680 | 07769_11060 | 08749_10980 | 09748_10570 | 09748_11660 | 12772_09150 | 12773_14620 | 127306_12630 | CCUG54800_12230 | 151023_10520 | T160124_10640 |
| 12 | 12    | 1     | Thioredoxin                                              | ATCC29328_11600 | ATCC53516_18690 | 07769_11070 | 08749_10980 | 09748_10580 | 09748_11660 | 12772_09150 | 12773_14620 | 127306_12630 | CCUG54800_12230 | 151023_10520 | T160124_10640 |
| 12 | 12    | 1     | hypothetical protein                                     | ATCC29328_11650 | ATCC53516_18290 | 07769_11090 | 08749_11010 | 09748_10590 | 09748_11660 | 12772_09230 | 12773_14690 | 127306_12700 | CCUG54800_12280 | 151023_10590 | T160124_10710 |
| 12 | 12    | 1     | hypothetical protein                                     | ATCC29328_11660 | ATCC53516_18300 | 07769_11100 | 08749_11020 | 09748_10600 | 09748_11660 | 12772_09240 | 12773_14700 | 127306_12710 | CCUG54800_12280 | 151023_10600 | T160124_10720 |
| 12 | 12    | 1     | hydroxylase A                                            | ATCC29328_11670 | ATCC53516_18310 | 07769_11110 | 08749_11030 | 09748_10610 | 09748_11660 | 12772_09250 | 12773_14710 | 127306_12720 | CCUG54800_12310 | 151023_10610 | T160124_10730 |
| 12 | 12    | 1     | NAD(+)-translocating NADH-quinone reductase              | ATCC29328_11680 | ATCC53516_18320 | 07769_11120 | 08749_11040 | 09748_10620 | 09748_11660 | 12772_09260 | 12773_14720 | 127306_12730 | CCUG54800_12310 | 151023_10620 | T160124_10740 |
| 12 | 12    | 1     | Electron transport complex protein RnfG                  | ATCC29328_11710 | ATCC53516_18350 | 07769_11150 | 08749_11050 | 09748_10650 | 09748_11660 | 12772_09290 | 12773_14750 | 127306_12760 | CCUG54800_12350 | 151023_10650 | T160124_10770 |
| 12 | 12    | 1     | hypothetical protein                                     | ATCC29328_11730 | ATCC53516_18370 | 07769_11170 | 08749_11070 | 09748_10670 | 09748_11660 | 12772_09310 | 12773_14770 | 127306_12780 | CCUG54800_12370 | 151023_10670 | T160124_10790 |
| 12 | 12    | 1     | hypothetical protein                                     | ATCC29328_11750 | ATCC53516_18390 | 07769_11190 | 08749_11110 | 09748_10690 | 09748_11660 | 12772_09330 | 12773_14790 | 127306_12800 | CCUG54800_12390 | 151023_10690 | T160124_10810 |
| 12 | 12    | 1     | N-acetylmuramoyl-L-alanine amidase LytC precu            | ATCC29328_11760 | ATCC53516_18400 | 07769_11200 | 08749_11120 | 09748_10700 | 09748_11660 | 12772_09330 | 12773_14800 | 127306_12800 | CCUG54800_12410 | 151023_10700 | T160124_10820 |
| 12 | 12    | 1     | CAMP factor (Cfa)                                        | ATCC29328_11770 | ATCC53516_18410 | 07769_11210 | 08749_11130 | 09748_10710 | 09748_11660 | 12772_09330 | 12773_14810 | 127306_12810 | CCUG54800_12410 | 151023_10710 | T160124_10830 |
| 12 | 12    | 1     | CAMP factor (Cfa)                                        | ATCC29328_11780 | ATCC53516_18420 | 07769_11220 | 08749_11140 | 09748_10720 | 09748_11660 | 12772_09340 | 12773_14820 | 127306_12820 | CCUG54800_12420 | 151023_10720 | T160124_10840 |
| 24 | 0.147 | 1     | Papain family amino-acid aminotransferase                | ATCC29328_11790 | ATCC29328_11790 | 07769_11230 | 08749_11150 | 09748_10730 | 09748_11660 | 12772_09340 | 12773_14820 | 127306_12820 | CCUG54800_12420 | 151023_10720 | T160124_10840 |
| 12 | 12    | 1     | Arginine transport ATP-binding protein ArTM              | ATCC29328_11820 | ATCC53516_18450 | 07769_11250 | 08749_11180 | 09748_10750 | 09748_11660 | 12772_09430 | 12773_14850 | 127306_12850 | CCUG54800_12450 | 151023_10750 | T160124_10870 |
| 12 | 12    | 1     | Inner membrane amino-acyl ABC transporter                | ATCC29328_11820 | ATCC53516_18450 | 07769_11250 | 08749_11180 | 09748_10750 | 09748_11660 | 12772_09440 | 12773_14860 | 127306_12860 | CCUG54800_12460 | 151023_10760 | T160124_10880 |
| 12 | 12    | 1     | rRNA pseudouridine synthase A                            | ATCC29328_11830 | ATCC53516_18460 | 07769_11260 | 08749_11190 | 09748_10760 | 09748_11660 | 12772_09450 | 12773_14870 | 127306_12870 | CCUG54800_12470 | 151023_10770 | T160124_10890 |
| 12 | 12    | 1     | Energy-coupling factor transporter transmembrane protein | ATCC29328_11840 | ATCC53516_18470 | 07769_11270 | 08749_11200 | 09748_10770 | 09748_11660 | 12772_09460 | 12773_14880 | 127306_12880 | CCUG54800_12480 | 151023_10780 | T160124_10900 |
| 24 | 0.167 | 1     | Energy-coupling factor transporter ATP-binding           | ATCC29328_11850 | ATCC29328_11850 | 07769_11280 | 08749_11210 | 09748_10780 | 09748_11660 | 12772_09460 | 12773_14880 | 127306_12880 | CCUG54800_12480 | 151023_10780 | T160124_10900 |
| 12 | 12    | 1     | DNA-directed RNA polymerase subunit beta'                | ATCC29328_11870 | ATCC53516_18490 | 07769_11310 | 08749_11240 | 09748_10810 | 09748_11660 | 12772_09480 | 12773_14910 | 127306_12910 | CCUG54800_12510 | 151023_10810 | T160124_10920 |
| 12 | 12    | 1     | DNA-directed RNA polymerase subunit beta                 | ATCC29328_11880 | ATCC53516_18500 | 07769_11320 | 08749_11240 | 09748_10820 | 09748_11660 | 12772_09500 | 12773_14920 | 127306_12920 | CCUG54800_12520 | 151023_10820 | T160124_10940 |
| 12 | 12    | 1     | AcyL-ACP thioesterase                                    | ATCC29328_11890 | ATCC53516_18510 | 07769_11330 | 08749_11250 | 09748_10830 | 09748_11660 | 12772_09510 | 12773_14930 | 127306_12930 | CCUG54800_12530 | 151023_10830 | T160124_10950 |
| 12 | 12    | 1     | AAA-like domain protein                                  | ATCC29328_11900 | ATCC53516_18520 | 07769_11340 | 08749_11260 | 09748_10840 | 09748_11660 | 12772_09510 | 12773_14930 | 127306_12930 | CCUG54800_12530 | 151023_10830 | T160124_10950 |
| 12 | 12    | 1     | Nurk domain protein                                      | ATCC29328_11910 | ATCC53516_18530 | 07769_11350 | 08749_11270 | 09748_10850 | 09748_11660 | 12772_09530 | 12773_14950 | 127306_12950 | CCUG54800_12550 | 151023_10850 | T160124_10970 |
| 12 | 12    | 1     | Ribosomal RNA small subunit methyltransferase            | ATCC29328_11920 | ATCC53516_18540 | 07769_11360 | 08749_11280 | 09748_10860 | 09748_11660 | 12772_09540 | 12773_14960 | 127306_12960 | CCUG54800_12560 | 151023_10860 | T160124_10980 |
| 12 | 12    | 1     | KS-glycyl-tRNA synthetase                                | ATCC29328_11930 | ATCC53516_18550 | 07769_11370 | 08749_11290 | 09748_10870 | 09748_11660 | 12772_09550 | 12773_14970 | 127306_12970 | CCUG54800_12570 | 151023_10870 | T160124_10990 |
| 12 | 12    | 1     | hypothetical protein                                     | ATCC29328_11940 | ATCC53516_18560 | 07769_11380 | 08749_11300 | 09748_10880 | 09748_11660 | 12772_09560 | 12773_14980 | 127306_12980 | CCUG54800_12580 | 151023_10880 | T160124_11000 |
| 12 | 12    | 1     | hypothetical protein                                     | ATCC29328_11950 | ATCC53516_18570 | 07769_11390 | 08749_11310 | 09748_10890 | 09748_11660 | 12772_09570 | 12773_14990 | 127306_12990 | CCUG54800_12590 | 151023_10890 | T160124_11010 |
| 12 | 12    | 1     | DNA polymerase III subunit tau                           | ATCC29328_11960 | ATCC53516_18580 | 07769_11400 | 08749_11320 | 09748_10900 | 09748_11660 | 12772_09580 | 12773_15000 | 127306_13000 | CCUG54800_12600 | 151023_10900 | T160124_11020 |
| 12 | 12    | 1     | hypothetical protein                                     | ATCC29328_11970 | ATCC53516_18590 | 07769_11410 | 08749_11330 | 09748_10910 | 09748_11660 | 12772_09590 | 12773_15010 | 127306_13010 | CCUG54800_12610 | 151023_10910 | T160124_11030 |
| 12 | 12    | 1     | hypothetical protein                                     | ATCC29328_11980 | ATCC53516_18600 | 07769_11420 | 08749_11340 | 09748_10920 | 09748_11660 | 12772_09600 | 12773_15020 | 127306_13020 | CCUG54800_12620 | 151023_10920 | T160124_11040 |
| 12 | 12    | 1     | Thymidylate kinase                                       | ATCC29328_11990 | ATCC53516_18610 | 07769_11430 | 08749_11350 | 09748_10930 | 09748_11660 | 12772_09610 | 12773_15030 | 127306_13030 | CCUG54800_12630 | 151023_10930 | T160124_11050 |
| 12 | 12    | 1     | S05 ribosomal protein L25                                | ATCC29328_12000 | ATCC53516_18620 | 07769_11440 | 08749_11360 | 09748_10940 | 09748_11660 | 12772_09620 | 12773_15040 | 127306_13040 | CCUG54800_12640 | 151023_10940 | T160124_11060 |
| 9  | 9     | 1     | Sigma-factor processing regulatory protein B             | ATCC29328_12010 | ATCC53516_18630 | 07769_11450 | 08749_11370 | 09748_10950 | 09748_11660 | 12772_09630 | 12773_15050 | *            | CCUG54800_12650 | *            | T160124_11070 |
| 12 | 12    | 1     | putative thiol peroxidase                                | ATCC29328_12020 | ATCC53516_18640 | 07769_11460 | 08749_11380 | 09748_10960 | 09748_11660 | 12772_09640 | 12773_15060 | *            | CCUG54800_12660 | *            | T151023_10960 |
| 10 | 10    | 1     | putative copper-exporting P-type ATPase V                | ATCC29328_12030 | ATCC53516_18650 | 07769_11470 | 08749_11390 | 09748_10970 | 09748_11660 | 12772_09650 | 12773_15070 | 127306_13070 | CCUG54800_12670 | 151023_10970 | T160124_11080 |
| 1  | 1     | 1     | hypothetical protein                                     | ATCC29328_12040 | ATCC53516_18660 | 07769_11480 | 08749_11400 | 09748_10980 | 09748_11660 | 12772_09660 | 12773_15080 | *            | CCUG54800_12680 | *            | T160124_11090 |
| 12 | 12    | 1     | D-alanyl-D-alanine carboxypeptidase                      | ATCC29328_12060 | ATCC53516_18680 | 07769_11500 | 08749_11420 | 09748_11000 | 09748_11660 | 12772_09660 | 12773_15100 | 127306_13100 | CCUG54800_12700 | 151023_11000 | T160124_11120 |
| 12 | 12    | 1     | UDP-N-acetyl-alpha-D-glucosamine C6 dehydratase          | ATCC29328_12070 | ATCC53516_18690 | 07769_11510 | 08749_11430 | 09748_11010 | 09748_11660 | 12772_09670 | 12773_15110 | 127306_13110 | CCUG54800_12710 | 151023_11010 | T160124_11130 |
| 12 | 12    | 1     | Branched-chain-amino-acid aminotransferase               | ATCC29328_12080 | ATCC53516_18700 | 07769_11520 | 08749_11440 | 09748_11020 | 09748_11660 | 12772_09680 | 12773_15120 | 127306_13120 | CCUG54800_12720 | 151023_11020 | T160124_11140 |
| 12 | 12    | 1     | ATC family protein S18                                   | ATCC29328_12090 | ATCC53516_18710 | 07769_11530 | 08749_11450 | 09748_11030 | 09748_11660 | 12772_09690 | 12773_15130 | 127306_13130 | CCUG54800_12730 | 151023_11030 | T160124_11150 |
| 12 | 13    | 0.141 | Single-stranded DNA-binding protein ssb                  | ATCC29328_12100 | ATCC53516_18720 | 07769_11540 | 08749_11460 | 09748_11040 | 09748_11660 | 12772_09700 | 12773_15140 | 127306_13140 | CCUG54800_12740 | 151023_11040 | T160124_11160 |
| 12 | 12    | 1     | S05 ribosomal protein S6                                 | ATCC29328_12110 | ATCC53516_18730 | 07769_11550 | 08749_11470 | 09748_11050 | 09748_11660 | 12772_09710 | 12773_15150 | 127306_13150 | CCUG54800_12750 | 151023_11050 | T160124_11170 |
| 12 | 12    | 1     | hypothetical protein                                     | ATCC29328_12120 | ATCC53516_18740 | 07769_11560 | 08749_11480 | 09748_11060 | 09748_11660 | 12772_09720 | 12773_15160 | 127306_13160 | CCUG54800_12760 | 151023_11060 | T160124_11180 |
| 12 | 12    | 1     | Biotin transporter BioY                                  | ATCC29328_12130 | ATCC53516_18750 | 07769_11570 | 08749_11490 | 09748_11070 | 09748_11660 | 12772_09730 | 12773_15170 | 127306_13170 | CCUG54800_12770 | 151023_11070 | T160124_11190 |
| 12 | 12    | 1     | isopentenyl-diphosphate delta-isomerase                  | ATCC29328_12140 | ATCC53516_18760 | 07769_11580 | 08749_11500 | 09748_11080 | 09748_11660 | 12772_09740 | 12773_15180 | 127306_13180 | CCUG54800_12780 | 151023_11080 | T160124_11200 |
| 12 | 12</  |       |                                                          |                 |                 |             |             |             |             |             |             |              |                 |              |               |



|    |       |                      |                                               |                 |                 |             |             |             |             |             |             |             |                 |              |              |
|----|-------|----------------------|-----------------------------------------------|-----------------|-----------------|-------------|-------------|-------------|-------------|-------------|-------------|-------------|-----------------|--------------|--------------|
| 12 | 12    | 1                    | Hypothetical protein                          | ATCC29328_13910 | ATCC53516_05040 | 07769_13360 | 08792_14460 | 09740_12800 | 09749_16430 | 12722_13790 | 12723_06410 | 12730_04590 | CCUG54800_03840 | T51023_03230 | T61024_02950 |
| 12 | 12    | 1                    | Ribonucleoside-diphosphate reductase subunit  | ATCC29328_13920 | ATCC53516_05050 | 07769_13370 | 08792_14470 | 09740_12810 | 09749_16440 | 12722_13800 | 12723_06420 | 12730_04580 | CCUG54800_03850 | T51023_03220 | T61024_02940 |
| 12 | 12    | 1                    | Maltose/maltotriose transporter ATP-binding   | ATCC29328_13930 | ATCC53516_05060 | 07769_13380 | 08792_14480 | 09740_12820 | 09749_16450 | 12722_13810 | 12723_06430 | 12730_04570 | CCUG54800_03860 | T51023_03210 | T61024_02930 |
| 12 | 12    | 1                    | Putative membrane protein YnfK                | ATCC29328_13940 | ATCC53516_05070 | 07769_13390 | 08792_14490 | 09740_12830 | 09749_16460 | 12722_13820 | 12723_06440 | 12730_04560 | CCUG54800_03870 | T51023_03200 | T61024_02920 |
| 7  | 9     | 0.445                | Hypothetical protein                          | ATCC29328_13960 | ATCC53516_05090 | 07769_13400 | 08792_14500 | 09740_12840 | 09749_16470 | 12722_13830 | 12723_06450 | 12730_04550 | CCUG54800_03880 | T51023_03190 | T61024_02910 |
| 3  | 4     | 0.36                 | Hypothetical protein                          | ATCC29328_13970 | *               | 07769_14510 | 08792_14510 | 09740_12850 | 09749_16480 | 12722_13840 | 12723_06460 | 12730_04540 | CCUG54800_03890 | T51023_03180 | T61024_02900 |
| 1  | 1     | 1                    | Hypothetical protein                          | ATCC29328_13980 | *               | *           | *           | 09740_12860 | 09749_16490 | 12722_13850 | 12723_06470 | 12730_04530 | CCUG54800_03900 | T51023_03170 | T61024_02890 |
| 12 | 12    | 1                    | Coenzyme PQQ synthase protein D               | ATCC29328_13990 | ATCC53516_05100 | 07769_13410 | 08792_14520 | 09740_12870 | 09749_16500 | 12722_13860 | 12723_06480 | 12730_04520 | CCUG54800_03910 | T51023_03160 | T61024_02880 |
| 12 | 12    | 1                    | OPT oligopeptide transporter protein          | ATCC29328_14000 | ATCC53516_05110 | 07769_13420 | 08792_14530 | 09740_12880 | 09749_16510 | 12722_13870 | 12723_06490 | 12730_04510 | CCUG54800_03920 | T51023_03150 | T61024_02870 |
| 12 | 12    | 1                    | Hypothetical protein                          | ATCC29328_14010 | ATCC53516_05120 | 07769_13430 | 08792_14540 | 09740_12890 | 09749_16520 | 12722_13880 | 12723_06500 | 12730_04500 | CCUG54800_03930 | T51023_03140 | T61024_02860 |
| 12 | 12    | 1                    | Pf5-dependent dihydroxyacetone kinase, ADP    | ATCC29328_14050 | ATCC53516_05010 | 07769_13440 | 08792_14550 | 09740_12900 | 09749_16530 | 12722_13890 | 12723_06510 | 12730_04490 | CCUG54800_03940 | T51023_03130 | T61024_02850 |
| 12 | 12    | 1                    | Aldehyde dehydrogenase                        | ATCC29328_14070 | ATCC53516_05030 | 07769_13460 | 08792_14570 | 09740_12920 | 09749_16540 | 12722_13900 | 12723_06520 | 12730_04480 | CCUG54800_03950 | T51023_03120 | T61024_02840 |
| 12 | 12    | 1                    | Tyrosine-protein kinase YwqD                  | ATCC29328_14080 | ATCC53516_05040 | 07769_13470 | 08792_14580 | 09740_12930 | 09749_16550 | 12722_13910 | 12723_06530 | 12730_04470 | CCUG54800_03960 | T51023_03110 | T61024_02830 |
| 12 | 15    | 0.145                | Capular polysaccharide type 8 biosynthesis p  | ATCC29328_14090 | ATCC53516_05050 | 07769_13480 | 08792_14590 | 09740_12940 | 09749_16560 | 12722_13920 | 12723_06540 | 12730_04460 | CCUG54800_03970 | T51023_03100 | T61024_02820 |
| 12 | 15    | 0.145                | Tyrosine-protein phosphatase YwqE             | ATCC29328_14100 | ATCC53516_05060 | 07769_13490 | 08792_14600 | 09740_12950 | 09749_16570 | 12722_13930 | 12723_06550 | 12730_04450 | CCUG54800_03980 | T51023_03090 | T61024_02810 |
| 12 | 12    | 1                    | Bacterial SH3 domain protein                  | ATCC29328_14110 | ATCC53516_05070 | 07769_13500 | 08792_14610 | 09740_12960 | 09749_16580 | 12722_13940 | 12723_06560 | 12730_04440 | CCUG54800_03990 | T51023_03080 | T61024_02800 |
| 3  | 3     | 1                    | Hypothetical protein                          | ATCC29328_14120 | *               | *           | *           | *           | *           | 12722_13950 | 12723_06570 | 12730_04430 | CCUG54800_04000 | T51023_03070 | T61024_02790 |
| 3  | 3     | 1                    | Hypothetical protein                          | ATCC29328_14130 | *               | *           | *           | *           | *           | 12722_13960 | 12723_06580 | 12730_04420 | CCUG54800_04010 | T51023_03060 | T61024_02780 |
| 12 | 12    | 1                    | Topology modulation protein                   | ATCC29328_14140 | ATCC53516_05080 | 07769_13510 | 08792_14620 | 09740_12970 | 09749_16590 | 12722_13970 | 12723_06590 | 12730_04410 | CCUG54800_04020 | T51023_03050 | T61024_02770 |
| 1  | 1     | 1                    | Hypothetical protein                          | ATCC29328_14150 | *               | *           | *           | *           | *           | 12722_13980 | 12723_06600 | 12730_04400 | CCUG54800_04030 | T51023_03040 | T61024_02760 |
| 6  | 0.167 | Hypothetical protein | ATCC29328_14160                               | ATCC53516_05100 | 07769_13520     | 08792_14630 | 09740_12980 | 09749_16600 | 09749_16600 | 12722_13990 | 12723_06610 | 12730_04390 | CCUG54800_04040 | T51023_03030 | T61024_02750 |
| 8  | 8     | 1                    | Cna protein B-type domain protein             | ATCC29328_14170 | ATCC53516_05110 | 07769_13530 | 08792_14640 | 09740_12990 | 09749_16610 | 12722_14000 | 12723_06620 | 12730_04380 | CCUG54800_04050 | T51023_03020 | T61024_02740 |
| 12 | 12    | 1                    | Putative acyltransferase                      | ATCC29328_14180 | ATCC53516_05120 | 07769_13540 | 08792_14650 | 09740_13000 | 09749_16620 | 12722_14010 | 12723_06630 | 12730_04370 | CCUG54800_04060 | T51023_03010 | T61024_02730 |
| 10 | 10    | 1                    | Integral membrane protein (intg_mem_TP038)    | ATCC29328_14190 | ATCC53516_05130 | 07769_13550 | 08792_14660 | 09740_13010 | 09749_16630 | 12722_14020 | 12723_06640 | 12730_04360 | CCUG54800_04070 | T51023_03000 | T61024_02720 |
| 12 | 12    | 1                    | Peptidase family 55I                          | ATCC29328_14200 | ATCC53516_05140 | 07769_13560 | 08792_14670 | 09740_13020 | 09749_16640 | 12722_14030 | 12723_06650 | 12730_04350 | CCUG54800_04080 | T51023_02990 | T61024_02710 |
| 5  | 5     | 1                    | HRAN domain protein                           | ATCC29328_14210 | *               | *           | *           | *           | *           | 12722_14040 | 12723_06660 | 12730_04340 | CCUG54800_04090 | T51023_02980 | T61024_02700 |
| 2  | 2     | 1                    | DnaI domain protein                           | ATCC29328_14220 | *               | *           | *           | *           | *           | 12722_14050 | 12723_06670 | 12730_04330 | CCUG54800_04100 | T51023_02970 | T61024_02690 |
| 12 | 12    | 1                    | Outer membrane-specific lipoprotein transport | ATCC29328_14230 | ATCC53516_05150 | 07769_13610 | 08792_14680 | 09740_13070 | 09749_16650 | 12722_14060 | 12723_06680 | 12730_04320 | CCUG54800_04110 | T51023_02960 | T61024_02680 |
| 12 | 12    | 1                    | Bacterial flagellin proteins, tetK family     | ATCC29328_14250 | ATCC53516_05210 | 07769_13630 | 08792_14710 | 09740_13090 | 09749_16660 | 12722_14070 | 12723_06690 | 12730_04310 | CCUG54800_04120 | T51023_02950 | T61024_02670 |
| 11 | 11    | 1                    | Bifunctional AAC/APH                          | ATCC29328_14260 | ATCC53516_05220 | 07769_13640 | 08792_14720 | 09740_13100 | 09749_16670 | 12722_14080 | 12723_06700 | 12730_04300 | CCUG54800_04130 | T51023_02940 | T61024_02660 |
| 12 | 12    | 1                    | dihydropteridine reductase                    | ATCC29328_14270 | ATCC53516_05230 | 07769_13650 | 08792_14730 | 09740_13110 | 09749_16680 | 12722_14090 | 12723_06710 | 12730_04290 | CCUG54800_04140 | T51023_02930 | T61024_02650 |
| 12 | 12    | 1                    | Phosphoribosyltransferase                     | ATCC29328_14280 | ATCC53516_05240 | 07769_13660 | 08792_14740 | 09740_13120 | 09749_16690 | 12722_14100 | 12723_06720 | 12730_04280 | CCUG54800_04150 | T51023_02920 | T61024_02640 |
| 12 | 12    | 1                    | DNA alkyltransfer repair enzyme               | ATCC29328_14300 | ATCC53516_05300 | 07769_13680 | 08792_14760 | 09740_13140 | 09749_16710 | 12722_14120 | 12723_06740 | 12730_04270 | CCUG54800_04160 | T51023_02910 | T61024_02630 |
| 12 | 12    | 1                    | Hypothetical protein                          | ATCC29328_14310 | ATCC53516_05310 | 07769_13690 | 08792_14770 | 09740_13150 | 09749_16720 | 12722_14130 | 12723_06750 | 12730_04260 | CCUG54800_04170 | T51023_02900 | T61024_02620 |
| 12 | 12    | 1                    | Putative lipid kinase YnfR                    | ATCC29328_14320 | ATCC53516_05320 | 07769_13700 | 08792_14780 | 09740_13160 | 09749_16730 | 12722_14140 | 12723_06760 | 12730_04250 | CCUG54800_04180 | T51023_02890 | T61024_02610 |
| 5  | 6     | 1                    | N-acetylmuramyl-L-alanine amidase LytC pre    | ATCC29328_14330 | ATCC53516_05330 | 07769_13710 | 08792_14790 | 09740_13170 | 09749_16740 | 12722_14150 | 12723_06770 | 12730_04240 | CCUG54800_04190 | T51023_02880 | T61024_02600 |
| 4  | 4     | 1                    | Hypothetical protein                          | ATCC29328_14340 | *               | *           | *           | *           | *           | 12722_14160 | 12723_06780 | 12730_04230 | CCUG54800_04200 | T51023_02870 | T61024_02590 |
| 11 | 13    | 0.154                | ABC transporter ATP-binding protein YnfE      | ATCC29328_14350 | ATCC53516_05410 | 07769_13720 | 08792_14800 | 09740_13180 | 09749_16750 | 12722_14170 | 12723_06790 | 12730_04220 | CCUG54800_04210 | T51023_02860 | T61024_02580 |
| 11 | 11    | 1                    | Hypothetical protein                          | ATCC29328_14370 | ATCC53516_05430 | 07769_13750 | 08792_14850 | 09740_13210 | 09749_16810 | 12722_14220 | 12723_06820 | 12730_04210 | CCUG54800_04220 | T51023_02850 | T61024_02570 |
| 12 | 12    | 1                    | Regulatory actin-binding protein CmrR         | ATCC29328_14380 | ATCC53516_05440 | 07769_13760 | 08792_14860 | 09740_13220 | 09749_16820 | 12722_14230 | 12723_06830 | 12730_04200 | CCUG54800_04230 | T51023_02840 | T61024_02560 |
| 12 | 12    | 1                    | TVPS8/MEK4 family inner membrane protein      | ATCC29328_14390 | ATCC53516_05450 | 07769_13770 | 08792_14870 | 09740_13230 | 09749_16830 | 12722_14240 | 12723_06840 | 12730_04190 | CCUG54800_04240 | T51023_02830 | T61024_02550 |
| 12 | 12    | 1                    | Adenylosuccinate lyase                        | ATCC29328_14400 | ATCC53516_05460 | 07769_13780 | 08792_14880 | 09740_13240 | 09749_16840 | 12722_14250 | 12723_06850 | 12730_04180 | CCUG54800_04250 | T51023_02820 | T61024_02540 |
| 12 | 12    | 1                    | Phosphoribosylamine-glycine ligase            | ATCC29328_14410 | ATCC53516_05470 | 07769_13790 | 08792_14890 | 09740_13250 | 09749_16850 | 12722_14260 | 12723_06860 | 12730_04170 | CCUG54800_04260 | T51023_02810 | T61024_02530 |
| 12 | 12    | 1                    | Bifunctional purine biosynthesis protein PurH | ATCC29328_14420 | ATCC53516_05480 | 07769_13800 | 08792_14900 | 09740_13260 | 09749_16860 | 12722_14270 | 12723_06870 | 12730_04160 | CCUG54800_04270 | T51023_02800 | T61024_02520 |
| 12 | 12    | 1                    | Phosphoribosyltransferase                     | ATCC29328_14430 | ATCC53516_05490 | 07769_13810 | 08792_14910 | 09740_13270 | 09749_16870 | 12722_14280 | 12723_06880 | 12730_04150 | CCUG54800_04280 | T51023_02790 | T61024_02510 |
| 12 | 12    | 1                    | Amidophosphoribosyltransferase precursor      | ATCC29328_14440 | ATCC53516_05500 | 07769_13820 | 08792_14920 | 09740_13280 | 09749_16880 | 12722_14290 | 12723_06890 | 12730_04140 | CCUG54800_04290 | T51023_02780 | T61024_02500 |
| 12 | 12    | 1                    | Phosphoribosylaminoimidazole-succinocarbox    | ATCC29328_14450 | ATCC53516_05510 | 07769_13830 | 08792_14930 | 09740_13290 | 09749_16890 | 12722_14300 | 12723_06900 | 12730_04130 | CCUG54800_04300 | T51023_02770 | T61024_02490 |
| 12 | 12    | 1                    | Hypothetical protein                          | ATCC29328_14460 | ATCC53516_05520 | 07769_13840 | 08792_14940 | 09740_13300 | 09749_16900 | 12722_14310 | 12723_06910 | 12730_04120 | CCUG54800_04310 | T51023_02760 | T61024_02480 |
| 9  | 9     | 1                    | Voltage-gated potassium channel KcsA          | ATCC29328_14470 | ATCC53516_05530 | 07769_13850 | 08792_14950 | 09740_13310 | 09749_16910 | 12722_14320 | 12723_06920 | 12730_04110 | CCUG54800_04320 | T51023_02750 | T61024_02470 |
| 8  | 8     | 1                    | NADH oxidase                                  | ATCC29328_14480 | *               | 07769_13860 | 08792_14960 | 09740_13320 | 09749_16920 | 12722_14330 | 12723_06930 | 12730_04100 | CCUG54800_04330 | T51023_02740 | T61024_02460 |
| 4  | 4     | 1                    | Putative aminoacyl-tRNA synthetase RctD       | ATCC29328_14490 | ATCC53516_05540 | 07769_13870 | 08792_14970 | 09740_13330 | 09749_16930 | 12722_14340 | 12723_06940 | 12730_04090 | CCUG54800_04340 | T51023_02730 | T61024_02450 |
| 11 | 12    | 1                    | NADP-reducing hydrogenase subunit HndA        | ATCC29328_14500 | ATCC53516_05620 | 07769_13880 | 08792_14980 | 09740_13340 | 09749_16940 | 12722_14350 | 12723_06950 | 12730_04080 | CCUG54800_04350 | T51023_02720 | T61024_02440 |
| 11 | 11    | 0.364                | Hypothetical protein                          | ATCC29328_14510 | ATCC53516_05630 | 07769_13890 | 08792_14990 | 09740_13350 | 09749_16950 | 12722_14400 | 12723_06960 | 12730_04070 | CCUG54800_04360 | T51023_02710 | T61024_02430 |
| 4  | 4     | 1                    | Hypothetical protein                          | ATCC29328_14520 | ATCC53516_05640 | *           | *           | *           | *           | 12722_14410 | 12723_06970 | 12730_04060 | CCUG54800_04370 | T51023_02700 | T61024_02420 |
| 10 | 10    | 1                    | Hypothetical protein                          | ATCC29328_14530 | ATCC53516_05650 | 07769_13910 | 08792_15010 | 09740_13360 |             |             |             |             |                 |              |              |

























**Table S2: CRISPR/cas systems in *Fingoldia* sp.**

| <b>STRAIN NAME</b>  | <b>SPECIES</b>        | <b># CRISPR</b> | <b># SPACERS</b> |
|---------------------|-----------------------|-----------------|------------------|
| 07T609              | <i>F. magna</i>       | 1               | 13               |
| 08T492              | <i>F. magna</i>       | 2               | 6, 6             |
| 09T408              | <i>F. magna</i>       | 3               | 17, 16, 12       |
| 09T494              | " <i>F. nericia</i> " | 1               | 34               |
| 12T272              | " <i>F. nericia</i> " | 1               | 41               |
| 12T273              | " <i>F. nericia</i> " | 0               | 0                |
| 12T306              | " <i>F. nericia</i> " | 1               | 82               |
| CCUG54800           | " <i>F. nericia</i> " | 0               | 0                |
| T151023             | " <i>F. nericia</i> " | 1               | 61               |
| T160124             | " <i>F. nericia</i> " | 1               | 14               |
| ATCC 29328          | <i>F. magna</i>       | 4               | 14, 3, 6, 4      |
| ATCC 53516          | " <i>F. nericia</i> " | 1               | 87               |
| GED7760A            | <i>F. magna</i>       | 0               | 0                |
| ACS-171-V-COL3      | <i>F. magna</i>       | 3               | 6, 17, 14        |
| BVS033A4            | <i>F. magna</i>       | 1               | 38               |
| SY403409CC001050417 | <i>F. magna</i>       | 1               | 11               |
| ALB8                | <i>F. magna</i>       | 0               | 0                |



***F. magna* 07T609: DR length: 36 Number of spacers: 13**

|       |                                      |                                 |       |
|-------|--------------------------------------|---------------------------------|-------|
| 34785 | GTTTGAGAATGATGTAATTCATATAGGTATTA AAC | ACGCGATTCTTGAGAGTGGTGCCGCTGATA  | 34850 |
| 34851 | GTTTGAGAATGATGTAATTCATATAGGTATTA AAC | TTCTCTGCTGAGGGGGCTTGAATAA       | 34916 |
| 34917 | GTTTGAGAATGATGTAATTCATATAGGTATTA AAC | AAGTATTCCTTATCATCTTTTGCGACTGTA  | 34982 |
| 34983 | GTTTGAGAATGATGTAATTCATATAGGTATTA AAC | TACGTTGGAGGGGGAGACCGTTCGGAAGCTA | 35049 |
| 35050 | GTTTGAGAATGATGTAATTCATATAGGTATTA AAC | AACTCAAAAAGACGATATCAACGAACAAAT  | 35115 |
| 35116 | GTTTGAGAATGATGTAATTCATATAGGTATTA AAC | TGGATAAAAAATTCATATACATCTACACAA  | 35181 |
| 35182 | GTTTGAGAATGATGTAATTCATATAGGTATTA AAC | TGCCATGAATGTCGCCATCGATTTCATCGA  | 35247 |
| 35248 | GTTTGAGAATGATGTAATTCATATAGGTATTA AAC | CACGGAAAACATAAAGAGTTGTACGAAAAA  | 35313 |
| 35314 | GTTTGAGAATGATGTAATTCATATAGGTATTA AAC | GCTATACTGATATACAAAAACTACGATATC  | 35379 |
| 35380 | GTTTGAGAATGATGTAATTCATATAGGTATTA AAC | TTTGTTGCTATGTCGTTGTTGCTATCCAGGA | 35446 |
| 35447 | GTTTGAGAATGATGTAATTCATATAGGTATTA AAC | TTATATTGCTAAAAATAATGGCGATCGGGG  | 35512 |
| 35513 | GTTTGAGAATGATGTAATTCATATAGGTATTA AAC | TTCAACTGCATTTCTCAAATTAATAAATGT  | 35578 |
| 35579 | GTTTGAGAATGATGTAATTCATATAGGTATTA AAC | AAAACGGCGTATAGGGTCTCGGGGTTCCCT  | 35644 |
| 35645 | GTTTGAGAATGATGTAATTCATATAGGTATTA AAC |                                 | 35680 |

***F. magna* 08T492: DR length: 30 Number of spacers: 6**

|      |                                 |                                       |      |
|------|---------------------------------|---------------------------------------|------|
| 7270 | CTTTACATTT CAGTATGATTAGATTTTAAT | TTTCCAGGCTTTCATCCAAGCTGCTTCTAATA      | 7335 |
| 7336 | ATTTACATTT CAGTATGAGTAGATTTTAAT | TTGGGCATTGCTGGAGCATTCTTGCTTGAAATT     | 7400 |
| 7401 | ATTTACATTT CAGTATGAGTAAATTTTAAT | TTCTCTAATTTGTCAGGTTGGCATTAAGACAAATGCA | 7465 |
| 7466 | ATTTACATTT CAGTATGAGTAGATTTTAAT | ACAAATCCTCAATATTCACAATATAGTCATCAATATC | 7532 |
| 7533 | ATTTACATTTCAATATGAGTAGATTTTAAT  | GATTTGATTAATGAAAAGACCATATTCAGAATT     | 7597 |
| 7598 | ATTTACATTTCAATATGAGTAGATTTTAAT  | TGGAGCTGGTCTTTAGGTTGAAACGACAAAGAAGA   | 7663 |
| 7664 | ATTTACATTTCAATATGAGTAGATTTTAAT  |                                       | 7693 |

***F. magna* 08T492: DR length: 25 Number of spacers: 6**

|       |                          |                                    |       |
|-------|--------------------------|------------------------------------|-------|
| 63273 | TTTTCTTATCTGTTGTAGTTTTTA | CTGGTCTACTA ACTTTGTTGTCTGAAGAA     | 63326 |
| 63327 | GTTTATCTGCTTTTTCTGATTTTC | TAACAAGAGTTACTTTCTTTCTTTCTGCA      | 63380 |
| 63381 | TTTTCTTGAATCTTCGGCTTTTT  | CCTTAGCTTAGCTTTCAATTTCTCA          | 63431 |
| 63432 | GCCTTTTTTCTTCATCGGCCTTTT | TCTTTGCTTCTTCAGCT                  | 63473 |
| 63474 | TTTTCTTTGCTTCTTCAGCTTTTT | TCTTTGCTTCTTCGGCTTTTTTGCTTCTTCAGCT | 63533 |
| 63534 | TTTTCTTTGCTTCTTCGGCTTTTT | GTTTTTCTGCCGAATTTTCAAGCCATCT       | 63587 |
| 63588 | ACTTCTTTTCTTTTCTGCTTGT   |                                    | 63612 |

**F. magna 09T408: DR length: 36 Number of spacers: 17**

|       |                                        |                                 |       |
|-------|----------------------------------------|---------------------------------|-------|
| 25488 | GTTTGAGAATGATGTAATTTTCATATAGGTATTA AAC | AAAATAACATTGAACAGTTTATACAAGCAA  | 25553 |
| 25554 | GTTTGAGAATGATGTAATTTTCATATAGGTATTA AAC | ATTC AATTTTGAATATCCTTCTTCCGTGAT | 25619 |
| 25620 | GTTTGAGAATGATGTAATTTTCATATAGGTATTA AAC | AACATCATATCCGAGAAGTAATATGGAATA  | 25685 |
| 25686 | GTTTGAGAATGATGTAATTTTCATATAGGTATTA AAC | GCGTATTGAAATATCATTCCACTGTATATG  | 25751 |
| 25752 | GTTTGAGAATGATGTAATTTTCATATAGGTATTA AAC | ATCATCGCTTACTCAGAAAAATTATTTTG   | 25817 |
| 25818 | GTTTGAGAATGATGTAATTTTCATATAGGTATTA AAC | TTCTTGAGTTTCTATTTGCTCATAATCAGAA | 25884 |
| 25885 | GTTTGAGAATGATGTAATTTTCATATAGGTATTA AAC | ATGATACGCTGAAATGGATAGCTCAGATAGG | 25951 |
| 25952 | GTTTGAGAATGATGTAATTTTCATATAGGTATTA AAC | CTGTAGACTTGAAGAATCCCATACAGGATA  | 26017 |
| 26018 | GTTTGAGAATGATGTAATTTTCATATAGGTATTA AAC | TAATCAAACGATTAAGAAAAAAGAGATAA   | 26083 |
| 26084 | GTTTGAGAATGATGTAATTTTCATATAGGTATTA AAC | TCTTTTGTGTCCTTCTATCTCTCCACCAAGA | 26149 |
| 26150 | GTTTGAGAATGATGTAATTTTCATATAGGTATTA AAC | AGGATATATATCCCCTATCGACTTATCAAG  | 26216 |
| 26217 | GTTTGAGAATGATGTAATTTTCATATAGGTATTA AAC | AATCATAGCAAGTCTTTTAGTCTTAGTAGT  | 26282 |
| 26283 | GTTTGAGAATGATGTAATTTTCATATAGGTATTA AAC | GATATTGGAGATATTGAGGACAAGGAATAT  | 26348 |
| 26349 | GTTTGAGAATGATGTAATTTTCATATAGGTATTA AAC | AATGCTACAAAAGATAATGGTCAAAGAGTA  | 26414 |
| 26415 | GTTTGAGAATGATGTAATTTTCATATAGGTATTA AAC | TTATAGGATAAAGTATTTGGGGTTAAATTGA | 26480 |
| 26481 | GTTTGAGAATGATGTAATTTTCATATAGGTATTA AAC | AAAGACGGCAAGGACTTATACATACGA     | 26546 |
| 26547 | GTTTGAGAATGATGTAATTTTCATATAGGTATTA AAC | ATGGGTTATAGAGATTCAAAAAAGTTACCG  | 26613 |
| 26614 | GTTTGAGAATGATGTAATTTTCATATAGGTATTA AAC |                                 | 26649 |

**F. magna 09T408: DR length: 30 Number of spacers: 16**

|       |                                |                                   |       |
|-------|--------------------------------|-----------------------------------|-------|
| 55864 | TGTTATACCCGCACACGCGGGGATGATCCT | ATTACCAAGAACAGTTGAAAAAATTGTATGA   | 55924 |
| 55925 | TGTTATACCCGCACACGCGGGGATGATCCT | GCACGTTTACGGCTCACTGTATGTTGGTAGT   | 55985 |
| 55986 | AGTTATACCCGCACACGCGGGGATGATCCT | AAAGAAAAAGTAAAAGTTGAGTAAAGTTGAGT  | 56046 |
| 56047 | AGTTATACCCGCACACGCGGGGATGATCCT | ATCATTACTTATTTCCATAAGCCTATTAATT   | 56107 |
| 56108 | CGTTATACCCGCACACGCGGGGATGATCCT | GATATATTGTTTATGTCATGAAGTCCGTCAT   | 56168 |
| 56169 | TGTTATACCCGCACACGCGGGGATGATCCT |                                   | 56229 |
| 56230 | CGTTATACCCGCACACGCGGGGATGATCCT | GTATAAGTTTTATCTGTAAC TAAATTATCTA  | 56290 |
| 56291 | CGTTATACCCGCACACGCGGGGATGATCCT | GTATAAGTTTTATCTGTAAC TAAATTATCTA  | 56351 |
| 56352 | CGTTATACCCGCACACGCGGGGATGATCCT | GTATAAGTTTTATCTGTAAC TAAATTATCTA  | 56412 |
| 56413 | CGTTATACCCGCACACGCGGGGATGATCCT | ACTTTTAGAAA CTGATG TACTAATTTTATCG | 56473 |
| 56474 | CGTTATACCCGCACACGCGGGGATGATCCT | GTATAAGTTTTATCTGTAAC TAAATTATCTA  | 56534 |
| 56535 | CGTTATACCCGCACACGCGGGGATGATCCT | ACTTTTAGAAA CTGATG TACTAATTTTATCG | 56595 |
| 56596 | CGTTATACCCGCACACGCGGGGATGATCCT | GTATAAGTTTTATCTGTAAC TAAATTATCTA  | 56656 |
| 56657 | CGTTATACCCGCACACGCGGGGATGATCCT | ACTTTTAGAAA CTGATG TACTAATTTTATCG | 56717 |
| 56718 | CGTTATACCCGCACACGCGGGGATGATCCT | TCATTAGATCATTTTACACGAATTTTACAG    | 56778 |
| 56779 | AGTTATACCCGCACACGCGGGGATGATCCC | TGATAACCAAATAAGAAGTCGCAAAATCAA    | 56839 |
| 56840 | CGTTATACCCGCACACGCGGGGATAATATT |                                   | 56869 |

***F. magna* 09T408: DR length: 31    Number of spacers: 12**

|      |                                 |                                      |      |
|------|---------------------------------|--------------------------------------|------|
| 8034 | GATTTACATTCCATTCTGGTTAGATTTTAAT | GATTGTTTTATCATAGACTTAACCCTCTGCGT     | 8097 |
| 8098 | TATTTACATTCCACTCTGGTTAGATTTTAAT | GAAAAAAGCGACGAAGTACAATTGAAACCTTGATGA | 8165 |
| 8166 | CATTTACATTCCACTCTGGTTAGATTTTAAT | AGCAGTAATAGGAGTTACAAGCTGGTATTATCA    | 8230 |
| 8231 | AATTTACATTCCACTCTGGTTAGATTTTAAT | ACAATAGCTTTCGTTTCTGTTGCTTTTTCAAGAA   | 8295 |
| 8296 | CATTTACATTCCACTATGGGTAGATTTTAAT | TTATCTTCTGATTCTTCTTGTCTTTTTATCAT     | 8360 |
| 8361 | CATTTACATTCCACTATGGGTAGATTTTAAT | TTTCTACGAACCTTGCTCGCCTTGTCATACG      | 8424 |
| 8425 | CATTTACATTCCACTATGGGTAGATTTTAAT | GTAATTTAGATATTGATGTAAAAAACATTGTTGTAA | 8491 |
| 8492 | TATTTACATTCCACTATGGTTAGATTTTAAT | TATCTAGATACATATCTAATATATATAATTCCT    | 8555 |
| 8556 | TATTTACATTCCACTATGGTTAGATTTTAAT | TAAAGAAGAATTAAGACGTGCCGAAGTATCAGGTC  | 8621 |
| 8622 | AATTTACATTCCACTCTGATTAGATTTTAAT | GAACTCAGGTGGTATTACTTTATTTAAAGAAAAGG  | 8687 |
| 8688 | TATTTACATTCCACTATGGGTAGATTTTAAT | TAAGACAACAACCAACACTCGAAGTCGGAGAAA    | 8751 |
| 8752 | TATTTACATTCCACTATGGGTAGATTTTAAT | CGGGTAAAGTGAGGAGTCTGCAAAGTCTGCTTGT   | 8817 |
| 8818 | TATTTACATTCCACTATGAGTAGATTTTAAT |                                      | 8848 |

***F. magna* ATCC29328: DR length: 36    Number of spacers: 14**

|       |                                        |                                  |       |
|-------|----------------------------------------|----------------------------------|-------|
| 79845 | GTTTGAGAATGATGTAATTTTCATATAGGTATTA AAC | TTTATCCTCGTCAAACCTTTTTCCACACAC   | 79910 |
| 79911 | GTTTGAGAATGATGTAATTTTCATATAGGTATTA AAC | TATGGTGGAGATGAGGAGTATCTACGAAC    | 79976 |
| 79977 | GTTTGAGAATGATGTAATTTTCATATAGGTATTA AAC | AGTACGAATTTGGATTTACTCCAAACGACG   | 80042 |
| 80043 | GTTTGAGAATGATGTAATTTTCATATAGGTATTA AAC | AGATTAGGTGAACATACAAATACAGTTACT   | 80108 |
| 80109 | GTTTGAGAATGATGTAATTTTCATATAGGTATTA AAC | TCAAACCTTGATGAGGTCAAGGATTTGATTT  | 80174 |
| 80175 | GTTTGAGAATGATGTAATTTTCATATAGGTATTA AAC | ATTTCTACACGATTTGTTTCATCATTGAA    | 80240 |
| 80241 | GTTTGAGAATGATGTAATTTTCATATAGGTATTA AAC | TTGCTATTTTTGTTTTAATCTTTAGTTCCG   | 80306 |
| 80307 | GTTTGAGAATGATGTAATTTTCATATAGGTATTA AAC | ATACTGATTAATCTGAATGGTTGAGTGAT    | 80372 |
| 80373 | GTTTGAGAATGATGTAATTTTCATATAGGTATTA AAC | ATTGTTTACAAGCTCCCGAATATAAGCTTG   | 80438 |
| 80439 | GTTTGAGAATGATGTAATTTTCATATAGGTATTA AAC | TGGTTATAAAAAACCGAAAGCAGAAGTGAA   | 80504 |
| 80505 | GTTTGAGAATGATGTAATTTTCATATAGGTATTA AAC | TTTGATGACTACGAATTGCAAGCAGTGTATA  | 80571 |
| 80572 | GTTTGAGAATGATGTAATTTTCATATAGGTATTA AAC | AATGATAATTTAAAAGAATACTTAATTTATA  | 80638 |
| 80639 | GTTTGAGAATGATGTAATTTTCATATAGGTATTA AAC | GAGTAAAAACATAAAAAAGATTGAGTATGTTG | 80704 |
| 80705 | GTTTGAGAATGATGTAATTTTCATATAGGTATTA AAC | CTGAAAGTTTAGGATTGACGTTGAGGACA    | 80770 |
| 80771 | GTTTGAGAATGATGTAATTTTCATATAGGTATTA AAC |                                  | 80806 |



***F. magna* ATCC29328: DR length: 28      Number of spacers: 3**

|       |                              |                                    |       |
|-------|------------------------------|------------------------------------|-------|
| 45598 | AGGAACACCCCGCTATTGCTGGGAAAA  | ATTGTGCTGTTTTAGGGCCTCCAGTATCTTCCCT | 45659 |
| 45660 | AGGAACACCCCGCATGTGCGGGTAAAA  | CTCAACACCGTTGTGTATTACATTATAAC      | 45720 |
| 45721 | AGAAACACCCCTGCACTTGCGGGTAAAA | CTGTGGACAAAATCTGTAACATAACAATCCTAT  | 45781 |
| 45782 | AGAAACACCCCGCATGTGCGGGTAAAA  |                                    | 45810 |

***F. magna* ATCC29328: DR length: 28      Number of spacers: 6**

|       |                              |                                     |       |
|-------|------------------------------|-------------------------------------|-------|
| 45891 | TGGAACACCCCTGCTATTGCTGGTAAAA | AAGTATTATTACGAAAAGTTTATAGATAAAA     | 45951 |
| 45952 | AGGAACACCCCGCATGTGCGGGTAAAA  | TTATTGATCTCTCATTTTTAGTTCTCTT        | 46011 |
| 46012 | AGGAACACCCCGCTTTTGCGGGTAAAA  | CTTATTGTTGAAATTATCTTTGTTTTAGAGTT    | 46072 |
| 46073 | AGAAATACCCCGCATGTGCGGGTAAACA | TGCTGTGTCAAATGCAAAAAGAAGATGTTTTAAAT | 46134 |
| 46135 | AGGAACACCCCGCATGTGCGGGTAAAA  | CATAAAGTTATAATTATAATCTTTTTTATAAC    | 46195 |
| 46196 | AGGAACACCCCGCTTGTGCGGGTAAAA  | TCATAGATACTTTTTCGCTCCTTGAAATAATC    | 46256 |
| 46257 | AGAAACACCCCGCTTGTGCGGGTAAAC  |                                     | 46284 |

***F. magna* ATCC29328: DR length: 25      Number of spacers: 4**

|       |                            |                                                |       |
|-------|----------------------------|------------------------------------------------|-------|
| 79988 | AACACCCCGCTTGTGCGGGTAAAA   | TTTTATTTAGAACTAACTGAGTCAGGCAACAGG              | 80045 |
| 80046 | AACACCCCTCGCTTGTGCGGGTAAAA |                                                | 80106 |
| 80107 | AACACCCCGCCTGTGCGGGTAATA   | TTAATTAAGGAATAGTTTTTCATCAGAAAACGCCATCGCCATCAGG | 80175 |
| 80176 | AACACACTCGCTTGTGCGAGTAAAA  | TAAAAAAAATTTAGGAAATGGTGTTATGAGACAGA            | 80235 |
| 80236 | AACACACTCGCCATTGCGAGAAATA  |                                                | 80260 |

*F. magna* ALB8: none

*F. magna* GED7760A: none

***F. magna* ACS-171-V-Col3: DR length: 30      Number of spacers: 6**

|       |                                |                                      |       |
|-------|--------------------------------|--------------------------------------|-------|
| 28319 | CTTTCATTCCACTCTAGTTAGATTTTAAT  | ATAATATCGTGTTAACTTCTGAGTTAATATAAT    | 28382 |
| 28383 | ATTTACATTTAGTATGAGTAGATTTTAAT  | CACGTGACTGGCAAGATTGTAAAAATCGATGAAT   | 28447 |
| 28448 | ATTTACATTCCACTATGGTTAGATTTTAAT | ACGACCTTGTCTTGTATGATTGAGTCTTTTGAAT   | 28512 |
| 28513 | ATTTACATTCCACTCTAGTTAGATTTTAAT | GCTTTCCCTTGCCTTCTACACCGTATTAGCGTACGG | 28579 |
| 28580 | ATTTACATTCCACTCTGGTTAGATTTTAAT | GATAGTTTCAGATAAAGGAACCAGCTTTTCAAGAAA | 28645 |
| 28646 | ATTTACATTCCACTCTGGTTAGATTTTAAC | GTACATGCTCACTGTTGGAAAACATGGCAAAAAGG  | 28710 |
| 28711 | ATTTACATTTAGTATGAGTAGATTTTAAT  |                                      | 28741 |

**F. magna ACS-171-V-Col3: DR length: 30 Number of spacers: 17**

|       |                               |                                       |       |
|-------|-------------------------------|---------------------------------------|-------|
| 28841 | ATTACATTCCACTATGGGTAGATTTTAAT | ATAAACACAAAGTATCGAATTACAAAGATAGATGT   | 28905 |
| 28906 | ATTACATTCCACTCCGGTTATATTTAAT  | ACTTACTTGAATTCGGACACATTTCTGCAAACCAATA | 28972 |
| 28973 | ATTACATTCCACTCTGGTTAGATTTAAT  | TTGAAGACATAATCGAGACGATTAAGGATGAGAC    | 29036 |
| 29037 | ATTTTCATTCCACTCTGGTTAGATTTAAT | TAAAGATACTACAAGAAGATACTTAACTAAGAACAT  | 29102 |
| 29103 | ATTACATTCCACTCTGGTTAGATTTAAT  | GAGGTGGTTATCTCATGATAGAACTAGGTTTTCAAGA | 29170 |
| 29171 | ATTACATTCCACTCTGGTTAGATTTAAT  | TTTGCTTTCGCAGTATCCACAGTGAGTGTGCTCCAAT | 29238 |
| 29239 | ATTACATTTCAGTATGATTAGATTTAAT  | TCATATGATAACCTTTTATAGCTAAATCAAATT     | 29302 |
| 29303 | ATTTACATTTCAGTATGAGTAGATTTAAT | ATAATGATTATGTTGTGGATATTGACACACTACCAA  | 29368 |
| 29369 | ATTACATTTCAGTATGAGTAGATTTAAT  | TTGGATTAACCTTACTGCAATTGAAGTAACTTCCCC  | 29434 |
| 29435 | ATTACATTTCAGTATGAGTAGATTTAAT  | TTAAAAATTTAAATAATACGCTTGATAAAAACTTTT  | 29501 |
| 29502 | ATTACATTTCAGTATGAGTAGATTTAAT  | CAGAGTTGAAAATAAAGAACTAAGTTTACAACCTTA  | 29567 |
| 29568 | ATTACATTTCAGTATGAGTAGATTTAAT  | CTCAAGGAGCGATCTCTATAAACAAGCTAATA      | 29632 |
| 29633 | ATTACATTTCAGTATGAGTAGATTTAAT  | GAACGATCAAGAAATACGATAATTGGATAGCTCAG   | 29698 |
| 29699 | ATTACATTTCAGTATGAGTAGATTTAAT  | TGCTTTCGCAGTAGACACAGTCAAGTATGCTCCGAT  | 29764 |
| 29765 | ATTACATTTCAGTATGAGTAGATTTAAT  | AACGGCCATGAAAAGTAAGTGAATGACCTTGTAAG   | 29829 |
| 29830 | ATTACATTTCAGTATGAGTAGATTTAAT  | GGATTGACCTTGTCAGACTTCAATGACCTAACCGT   | 29894 |
| 29895 | ATTACATTTCAGTATGAGTAGATTTAAT  | CGTTCATATCTTTTTCAAAGTCGTTTGATGAGCTATT | 29961 |
| 29962 | ATTACATTTCAGTATGAGTAGATTTAAT  |                                       | 29991 |

**F. magna ACS-171-V-Col3: DR length: 36 Number of spacers: 14**

|       |                                      |                                  |       |
|-------|--------------------------------------|----------------------------------|-------|
| 11866 | ATTTAATACCTATATGAAATTACATCATTCTCAAAC | TGATTGAGCAAATAACGAAAGAGACAAAAG   | 11931 |
| 11932 | GTTAATACCTATATGAAATTACATCATTCTCAAAC  |                                  | 11997 |
| 11998 | GTTAATACCTATATGAAATTACATCATTCTCAAAC  | CATAATAGTACCTGTTAAAATCTTCTATAAA  | 12064 |
| 12065 | GTTAATACCTATATGAAATTACATCATTCTCAAAC  | ATTTGATGTTGATTGTTTCTTTATCGACA    | 12130 |
| 12131 | GTTAATACCTATATGAAATTACATCATTCTCAAAC  | TCCCAAATCCGAACTTATCTCTCAGTACCA   | 12196 |
| 12197 | GTTAATACCTATATGAAATTACATCATTCTCAAAC  | GCAAAAAGATAATAAAAAAATACCCCGTGT   | 12262 |
| 12263 | GTTAATACCTATATGAAATTACATCATTCTCAAAC  | TAAAACATTGAAATACACTACAGAGAGTC    | 12328 |
| 12329 | GTTAATACCTATATGAAATTACATCATTCTCAAAC  | TCATCATAGTTGCAAATCCTCAATGTTTACA  | 12395 |
| 12396 | GTTAATACCTATATGAAATTACATCATTCTCAAAC  | TGATTTCGAAAATATCTGTTCTAAAT       | 12461 |
| 12462 | GTTAATACCTATATGAAATTACATCATTCTCAAAC  | ACTGAAAAAGAGATTTTCTAGATTATATAGCA | 12527 |
| 12528 | GTTAATACCTATATGAAATTACATCATTCTCAAAC  | CTCTAGTTTGTTCGTTAGAAACACGTTCTT   | 12593 |
| 12594 | GTTAATACCTATATGAAATTACATCATTCTCAAAC  | TAAGTTCAAGCACCGCAGGTTCTTTGTCTT   | 12659 |
| 12660 | GTTAATACCTATATGAAATTACATCATTCTCAAAC  | TTAAAATGTAATGGTATGAATTTTCTAATT   | 12725 |
| 12726 | GTTAATACCTATATGAAATTACATCATTCTCAAAC  | CCAACATGCAAATGTTAGCTGATTTATAC    | 12791 |
| 12792 | GTTAATACCTATATGAAATTACATCATTCTCAAAC  |                                  | 12827 |



*F. magna* BVS033A4: DR length: 30

Number of spacers: 38

|      |                               |                                        |      |
|------|-------------------------------|----------------------------------------|------|
| 106  | CTTTACATCCCCTCTAGTTAGATTTAAT  | ATTGTTTCAAATACACACCCTTATGTTAAAGGCT     | 171  |
| 172  | ATTTACATTCCACTATGGGTAGATTTAAT | CCAGTTGCTACATTTGTTGCTATTACTTATTGGTA    | 236  |
| 237  | ATTTACATTCCACTATGGGTAGATTTAAT | AGTGTTCGGGCTTATAATGTTGGTGTGTTGGTGT     | 302  |
| 303  | ATTTACATTCCACTATGGGTAGATTTAAT | TTAATTGAATAGAATACTTTATTCGGATATTTATC    | 367  |
| 368  | ATTTACATTCCACTATGGGTAGATTTAAT | AGCGTATTTCCAAGAAGTGCTGCACCTCCTGTGCGT   | 433  |
| 434  | ATTTACATTCCACTCTGGTTAGATTTAAT | CCTCAAAGAACTAATCTTTTTTCGCTCCCTGCCTC    | 499  |
| 500  | ATTTACATTCCACTCTGGTTAGATTTAAT | AGGGATAAAGATGGCAAAAACATCAAGGTTCCGCT    | 564  |
| 565  | ATTTACATTCCACTCTGGTTAGATTTAAT | GGATTTTATGATTTAAAATTTATTGATGAAGAAGAT   | 630  |
| 631  | ATTTACATTCCACTCTGGTTAGATTTAAT | TCCAAGCCAAAAAAGCTCCAGCAATTCGAGACCCAC   | 697  |
| 698  | ATTTACATTCCACTCTGGTTAGATTTAAT | ATGTGACCTGCCTTGATTCTAGTTGCATTAGCTCT    | 763  |
| 764  | ATTTACATTCCACTCTGGTTAGATTTAAT | ACAATTTTTATTGAAGTTGAACCTATTAATCAAAA    | 829  |
| 830  | ATTTACATTCCACTCTGGTTAGATTTAAT | TTAATTTAAAAAAAATTCTCTCAGTTTTCATC       | 893  |
| 894  | ATTTACATTCCACTCTGGTTAGATTTAAT | TCAATCGACAGTTCAGATAAAGATTACTTCGAGGAT   | 959  |
| 960  | ATTTACATTCCACTCTGGTTAGATTTAAT | AAAGCTCCAATCAGATTTTTACTGTCTCGATTAAGACC | 1027 |
| 1028 | ATTTACATTCCACTCTGGTTAGATTTAAT | AAAAAGATGCAATCAGATTATCTTGCATAGTACAA    | 1092 |
| 1093 | ATTTACATTCCACTCTGGTTAGATTTAAT | CGAAGACGGTGAAATCTTGTTAAAGATATTACTCT    | 1158 |
| 1159 | ATTTACATTCCACTCTGGTTAGATTTAAT | AAGGCTAAGGAGGGCTCACAATGAAAGAAAAAT      | 1222 |
| 1223 | ATTTACATTCCACTCTGGTTAGATTTAAT | TACTATTGTGATGATTTCCAGCTAATGGATTGTG     | 1287 |
| 1288 | ATTTACATTCCACTCTGGTTAGATTTAAT | TGTTTTATATCCAGTAACTAAATCTTTGATATCATG   | 1353 |
| 1354 | ATTTACATTCCACTCTGGTTAGATTTAAT | GTCAATCCTTGAGTTGAACCTTGCCTGAAGCTTA     | 1417 |
| 1418 | ATTTACATTCCACTCTGGTTAGATTTAAT | AAGCAAATTATACCAAAGTTCGACTTAGCTATAAA    | 1482 |
| 1483 | ATTTACATTCCACTCTGGTTAGATTTAAT | TGATGCAGTGGGAGGACAAAATTGAACGTGTTAATAT  | 1548 |
| 1549 | ATTTACATTCCACTCTGGTTAGATTTAAT | CTTGTAATTGCACCTAAAAAAGTGGCAGAAGCTACT   | 1614 |
| 1615 | ATTTACATTCCACTCTGGTTAGATTTAAT |                                        | 1679 |
| 1680 | ATTTACATTCCACTCTGGTTAGATTTAAT | TTTTAACTTGCCTTGCTTCTCTGCAAATCCCTC      | 1746 |
| 1747 | ATTTACATTCCACTCTGGTTAGATTTAAT | ATGTATTTTAGTACGTCATCGCTAAATGTTTTTCTC   | 1813 |
| 1814 | ATTTACATTCCACTCTGGTTAGATTTAAT | TTAAACAGTTTTCTTCATAGCTAACATACTGTTTACT  | 1880 |
| 1881 | ATTTACATTCCACTCTGGTTAGATTTAAT | CGACAATATCTGTACCATTAGTCGGTACTATAGCAGC  | 1947 |
| 1948 | ATTTACATTCCACTCTGGTTAGATTTAAT | TATCAACTCATGTTCAATCATGACATCTGATTAAT    | 2013 |
| 2014 | ATTTACATTCCACTCTGGTTAGATTTAAT | AAAAGAATAAGTGCAAAATGAGTATTAATGAACTAT   | 2080 |
| 2081 | ATTTACATTCCACTCTGGTTAGATTTAAT | TAGATTCCGAAAGCAACTGGAACTCTAATAGAT      | 2147 |
| 2148 | ATTTACATTCCACTCTGGTTAGATTTAAT | CTTACATGGTCTTAAAAATTATCCAAATTAAGT      | 2212 |
| 2213 | ATTTACATTCCACTCTGGTTAGATTTAAT | AAGAAAAGTTATTAAGAAGAGGTCGTAGCTTTCTAC   | 2279 |
| 2280 | ATTTACATTCCACTCTGGTTAGATTTAAT | TTTTGTATTGATAATTTTCAATTGTTGAAATCTTTAAT | 2347 |
| 2348 | ATTTACATTCCACTCTGGTTAGATTTAAT | GAAGGGAAAGCAGGTAAGGTTTCAAGCATTCAAAG    | 2412 |
| 2413 | ATTTACATTCCACTCTGGTTAGATTTAAT | GGATTTGACGAAAAATCCAACCTGGGAGGATGCGAC   | 2477 |
| 2478 | ATTTACATTCCACTCTGGTTAGATTTAAT | TCGTTAATTTCTTATATTTTGTATTAATGAA        | 2541 |
| 2542 | ATTTACATTCCACTCTGGTTAGATTTAAT | TTGTACTATATCCTCGAATAGTCAATTTAAAATT     | 2606 |
| 2607 | ATTTACATTCCACTCTGGTTAGATTTAAT |                                        | 2636 |

***F. magna* SY403409CC001050417: DR length: 36 Number of spacers: 11**

|       |                                      |                                |       |
|-------|--------------------------------------|--------------------------------|-------|
| 17675 | GTTTAATACCTATATGAAATTACATCATTCTCAAAC | TGCATTCTCCCATATCAGCATCTGCCAA   | 17740 |
| 17741 | GTTTAATACCTATATGAAATTACATCATTCTCAAAC | ACATTTTTTAATTTGAGAAATGCAGTTGAA | 17806 |
| 17807 | GTTTAATACCTATATGAAATTACATCATTCTCAAAC | TGTCCTTTTTCAGAATTATCTCTTTTTCC  | 17872 |
| 17873 | GTTTAATACCTATATGAAATTACATCATTCTCAAAC | TTCTGTAAAGTCTTCATTGTCTAACAATT  | 17938 |
| 17939 | GTTTAATACCTATATGAAATTACATCATTCTCAAAC | GAACGATAAGCTACCATATCCGTTTTTGTC | 18005 |
| 18006 | GTTTAATACCTATATGAAATTACATCATTCTCAAAC | TGTCCTTTTTCAGAATTATCTCTTTTTCCG | 18071 |
| 18072 | GTTTAATACCTATATGAAATTACATCATTCTCAAAC | TTTCGCTTCGTACTTCTTACCATCGAACA  | 18137 |
| 18138 | GTTTAATACCTATATGAAATTACATCATTCTCAAAC | TGCTGTAATACTATCGTACTCACTTTGTG  | 18203 |
| 18204 | GTTTAATACCTATATGAAATTACATCATTCTCAAAC | ATCGATTTCGGCACTGATGTTCAAATAACT | 18269 |
| 18270 | GTTTAATACCTATATGAAATTACATCATTCTCAAAC | ACCTTAGGACCAACAGGACCAGTTTTCCG  | 18335 |
| 18336 | GTTTAATACCTATATGAAATTACATCATTCTCAAAC | TTAGCATGTAGTATCCACTGACGTAGTTG  | 18401 |
| 18402 | GTTTAATACCTATATGAAATTACATCATTCTCAAAC |                                | 18437 |

***"F. nericia"* 09T494: DR length: 30 Number of spacers: 34**

|       |                                |                                       |       |
|-------|--------------------------------|---------------------------------------|-------|
| 36946 | ATTTACATTCCAATATGGGTGGATTTAAT  | TGGGGCGTAGCTGGTGCCTTTTAGCTGGAAAT      | 37010 |
| 37011 | ATTTACATTCCACTTTGGGTAGATTTAAT  | CAAGTCATATTCAAACTGGATCATGCGAAAAAGA    | 37074 |
| 37075 | ATTTACATTCCACTTTGGGTAGATTTAAT  | AATGAATCCTTGAGCGCCTTGAAGTCCGGGGTCTCCT | 37142 |
| 37143 | ATTTACATTTCAATATGAGTAGATTTAAT  | AAGAGTTAAAAGAGGAGATGTGAGTCAATGTAGCTT  | 37208 |
| 37209 | ATTTACATTTCAGTATGATTAGATTTAAT  | GGAGCAATACGAATTGCAAACCTCAAAGAAGAGTGA  | 37273 |
| 37274 | ATTTACATTTCAGTATGAATAGTTTAAATG | CTTCTGGACCAACCTTTAACCCTTTATTCCA       | 37337 |
| 37338 | ATTTACATTCCATTCTGGTTAGATTTAAT  | GTCATGAGTGGACATATAACTTGAAGCTCAAAAA    | 37401 |
| 37402 | ATTTACATTCCACTCTGGTTAGATTTAAT  | GAAGTTGTGGATAGCAGAAATCAAAGGGCATCTTA   | 37466 |
| 37467 | ATTTACATTCCACTCTGGGTAGATTTAAT  | TAAATTGCTTTGTGGATATCAGAAAATGTTACGATA  | 37532 |
| 37533 | CTTTACATTCCATTCTGGTTAGATTTAAT  | AGGAAGTTACCAGTTTAGGGAACAAGAATTCACAT   | 37598 |
| 37599 | CTTTACATTCCATTCTGGTTAGATTTAAT  | AAGTGGCAAAGACGGACAACCTCCATCTGGGTTAGT  | 37664 |
| 37665 | CTTTACATTCCATTCTGGTTAGATTTAAT  | AAGTTAATCCCCCTTGACCATCTTCTTATATAAAAA  | 37731 |
| 37732 | CTTTACATTCCATTCTGGTTAGATTTAAT  | TTATCTTCAAGGTTTGAGGGGATATAATGCAAGTCT  | 37797 |
| 37798 | CTTTACATTCCATTCTGGTTAGATTTAAT  | TTTACTTGAAATCTTTATCAACATCAATTAATTA    | 37863 |
| 37864 | CTTTACATTCCATTCTGGTTAGATTTAAT  | TTCTGCTGAATGTGTTACCAACAATTGCAAAGATT   | 37929 |
| 37930 | CTTTACATTCCATTCTGGTTAGATTTAAT  | TTTAGGACTTGGTGCTAACATTATGAGTGGAAATTT  | 37995 |
| 37996 | CTTTACATTCCATTCTGGTTAGATTTAAT  | TTTCCAGTGAAGCTAGCTTCAATTAACCTGATTAAGT | 38061 |
| 38062 | CTTTACATTCCATTCTGGTTAGATTTAAT  | TTTACTTGAAATCTTTATCAACATGAATTAATTA    | 38127 |
| 38128 | CTTTACATTCCATTCTGGTTAGATTTAAT  | GAATAGAAAATCAACAATTATTTCAAACAGAAAATA  | 38193 |
| 38194 | CTTTACATTCCATTCTGGTTAGATTTAAT  | TTCTCCAAAGTCAAATTTTTCAGTTTTGAAAATTGAT | 38260 |
| 38261 | CTTTACATTCCATTCTGGTTAGATTTAAT  | TCAATCATTTTCGTAATAATCAATAATTTTAAAGT   | 38325 |



|       |                               |                                       |       |
|-------|-------------------------------|---------------------------------------|-------|
| 38326 | CTTTACATTCCATTCTGGTTAGATTTAAT | AACTTGAACAGAATATCCGTATCCCTCCTCTGTGAT  | 38391 |
| 38392 | CTTTACATTCCATTCTGGTTAGATTTAAT | CAAACAAGGTCAAAGATAGGATTAAGTGGAATAC    | 38457 |
| 38458 | CTTTACATTCCATTCTGGTTAGATTTAAT |                                       | 38523 |
| 38524 | CTTTACATTCCATTCTGGTTAGATTTAAT | TTCAATTTGAGTGTGTTACCAATAATTGCAAAGATTT | 38589 |
| 38590 | CTTTACATTCCATTCTGGTTAGATTTAAT | CTCTTTTCTTTAGTGAATCATATTCAAGTTTTCG    | 38655 |
| 38656 | CTTTACATTCCATTCTGGTTAGATTTAAT | TAAATAGGACACAAAGAGATTATCTCACTACAAG    | 38720 |
| 38721 | CTTTACATTCCATTCTGGTTAGATTTAAT | CTTTTATACTAAAATCTTCAATATCAAAATATAT    | 38784 |
| 38785 | CTTTACATTCCATTCTGGTTAGATTTAAT | TTGTCTTGTCTGTGTTTTCTCTTTTCGTAGAT      | 38850 |
| 38851 | CTTTACATTCCATTCTGGTTAGATTTAAT | TTTACCCCATATAATTTACATATGTTTTATCATAAAT | 38916 |
| 38917 | CTTTACATTCCATTCTGGTTAGATTTAAT | TCTTTCTTACTATAACTTATTATACCTT          | 38982 |
| 38983 | CTTTACATTCCATTCTGGTTAGATTTAAT | TCTAATGCAAACGGTCTAAATTTTTTGGTTTTGG    | 39048 |
| 39049 | CTTTACATTCCATTCTGGTTAGATTTAAT | CTTTGTTAAGCTTAAAGCTTGGAGAATATCTAATAAA | 39115 |
| 39116 | CTTTACATTCCATTCTGGTTAGATTTAAT | AATAATTTTTAATGTATAATGAACTTGATTATTAT   | 39181 |
| 39182 | CTTTACATTCCATTCTGGTTAGATTTAAT |                                       | 39211 |

**"F. nericia" 12T272: DR length: 30 Number of spacers: 41**

|       |                                 |                                                            |       |
|-------|---------------------------------|------------------------------------------------------------|-------|
| 68572 | ATTTACATTCCATTCTGGTTGATTTAAT    | TAAAAATAGACAATGGCAAGAGGGCAAGAGATCTCA                       | 68638 |
| 68639 | ATTTACATTCCATTTGGTTGATTTGAT     | CAGTAAGTTGCGTTGTAGTTACTTTTCTATGAAG                         | 68703 |
| 68704 | ATTTAAATTTTCATTATGAGTAGGTTTAAAT | TGTCTTTTAAAGTCCA TAGAACCTGCTATCGTATATTACATT<br>CACATAATATG | 68789 |
| 68790 | ATTTACATTCCACTCTGGTTAGATTTAAT   | TGAAGTATTGTATACTTTTAAATCTATTAGCTATCAC                      | 68856 |
| 68857 | ATTTACATTCCACTTTGGTTAAATTTAAT   | TATATTCTTGCCAAGTAAACTTTTAAAAGTTCAAAA                       | 68922 |
| 68923 | ATTCACATTCCATTCTGGTTAAATTTAAT   | TCATAAAGAATTTACCAATATTTATATAATCATT                         | 68987 |
| 68988 | ATTTACATTCCACTCTGGTTAAATTTAAT   | CCCTCATCTGTGATAGGGTAAATAAAAATAACTGTA                       | 69052 |
| 69053 | ATTTACATTCCACTCTGGTTAAATTTAAT   | ATATTTACCACCATAATTTACATAAGTTTGATTATAGAT                    | 69121 |
| 69122 | ATTTACATTCCACTCTGGTTAAATTTAAT   | TCTACATTTAAAACCTCTTTATATATTTGCTCTTGTG                      | 69188 |
| 69189 | ATTTACATTCCACTCTGGTTAAATTTAAT   | ATGGTTATTGAAAAAGATGACGGTGGCTCTGGTGGT                       | 69254 |
| 69255 | ATTTACATTCCACTCTGGTTAAATTTAAT   | TGAGGATAAGGTAATGTCGAATTTAGTATTGATATT                       | 69320 |
| 69321 | ATTTACATTCCACTCTGGTTAAATTTAAT   | AACAATCGTGACGTACCCGCACAGCTTAGAGTGAA                        | 69385 |
| 69386 | ATTTACATTCCACTCTGGTTAAATTTAAT   | CCATATTCTGTCCCCTTCGCCATTATCCAAGGAAG                        | 69451 |
| 69452 | ATTTACATTCCACTCTGGTTAAATTTAAT   | AATGAAAAAACAAAATCCTAGACGTTATCAAGTCGC                       | 69517 |
| 69518 | ATTTACATTCCACTCTGGTTAAATTTAAT   | TGGAAGGTAAAAGCATTGCTAACATTACAAGAG                          | 69581 |
| 69582 | ATTTACATTCCACTCTGGTTAAATTTAAT   | AAAGCTAAAAGCGGAGCAATAACAGCCAAAATAAC                        | 69646 |
| 69647 | ATTTACATTCCACTCTGGTTAAATTTAAT   | CTTTAGCTGGATAGGATTTGACCATGAGCAGAG                          | 69714 |
| 69715 | ATTTACATTCCACTCTGGTTAAATTTAAT   | ATATAATCATAACTGTACTTTGTAATTTCAA                            | 69780 |
| 69781 | ATTTACATTCCACTCTGGTTAAATTTAAT   | TTTTTATATAAAGAAGACGGTCAAGGTGGTTTGAC                        | 69845 |
| 69846 | ATTTACATTCCACTCTGGTTAAATTTAAT   | CAAACTTTTAAAAATTTGACCTTTTCGTATTGCCAT                       | 69911 |

|       |                              |                                            |       |
|-------|------------------------------|--------------------------------------------|-------|
| 69912 | ATTACATTCCACTCTGGTTAAATTTAAT | GTGCTTGATAAATTTGTGCATAATCATTAACTAA         | 69976 |
| 69977 | ATTACATTCCACTCTGGTTAAATTTAAT | TAAATTGTTTTATTATTTTCATTAATCCAGTTATTA       | 70042 |
| 70043 | ATTACATTCCACTCTGGTTAAATTTAAT | TCACCTAAAAAATGTTATTTAAATCATCTATTCTT        | 70107 |
| 70108 | ATTACATTCCACTCTGGTTAAATTTAAT |                                            | 70173 |
| 70174 | ATTACATTCCACTCTGGTTAAATTTAAT | TGGAACAAAAAATTGGCAGTAGAAAATTTGACGGAACATTAC | 70245 |
| 70246 | ATTACATTCCACTCTGGTTAAATTTAAT | TTCCAGTTGGTAGTTTATAATTTAACATAATAGC         | 70310 |
| 70311 | ATTACATTCCACTCTGGTTAAATTTAAT | CAATAAAATTGTCTATATGTGATATTTTCGTTTACTAA     | 70377 |
| 70378 | ATTACATTCCACTCTGGTTAAATTTAAT | ATTGTTATTAATTTACCTTGCATTTTATCAATGAT        | 70443 |
| 70444 | ATTACATTCCACTCTGGTTAAATTTAAT | TATTATACCAAGTTTACCTAAATTTGAT               | 70508 |
| 70509 | ATTACATTCCACTCTGGTTAAATTTAAT | TAAGCCATTCTTTTAGGTCTTTGATGCCTCAAGAGA       | 70574 |
| 70575 | ATTACATTCCACTCTGGTTAAATTTAAT | TCATTAAAGCAATGCTAATCTGTAAGTA               | 70639 |
| 70640 | ATTACATTCCACTCTGGTTAAATTTAAT | CTGAACTCATAAATTGAAATAATAGGTCAACTTCGTT      | 70706 |
| 70707 | ATTACATTCCACTCTGGTTAAATTTAAT | GTAGCTTTTCCATCTCTGTAGAGTTCTACTTCTATT       | 70772 |
| 70773 | ATTACATTCCACTCTGGTTAAATTTAAT | CTTGGTATTATCAGAAATACTTCTCTAGCAACA          | 70837 |
| 70838 | ATTACATTCCACTCTGGTTAAATTTAAT | TCATTTGCAATTGCTCAACTTACGAAGAAAGTTTT        | 70903 |
| 70904 | ATTACATTCCACTCTGGTTAAATTTAAT | TCAGTTTTAACAACTGCAAGAAAATCATCCCACATAAATTC  | 70974 |
| 70975 | ATTACATTCCACTCTGGTTAAATTTAAT | TACATTTTCTCCAAGTAGATTGGGTCTATACTGTG        | 71039 |
| 71040 | ATTACATTCCACTCTGGTTAAATTTAAT | GTTGTACTTTCTTCTACTGTATCAACAAGTGT           | 71104 |
| 71105 | ATTACATTCCACTCTGGTTAAATTTAAT | CCCAATGTTTCGTGTGCTCCAAGTGAATAATT           | 71168 |
| 71169 | ATTACATTCCACTCTGGTTAAATTTAAT | ATTTATATTACCCTTGATTTCTTTATTTTGAAAAAC       | 71234 |
| 71235 | ATTACATTCCACTCTGGTTAAATTTAAT | GTTGTACTTTCTTCTACTGTATCAACAAGTGT           | 71299 |
| 71300 | ATTACATTCCACTCTGGTTAAATTTAAT |                                            | 71329 |

"F. nerica" 12T273: none

"F. nerica" 12T306: DR length: 30 Number of spacers: 82

|       |                            |                                        |       |
|-------|----------------------------|----------------------------------------|-------|
| 14108 | ATTAATCTATCCAGAGTGAATGTAAT | TTGTCCCATATCGTTAATAAATGTTGAAAATTTTG    | 14173 |
| 14174 | ATTAATCTATCCAGAGTGAATGTAAT | CTACTAAAAATGATGAAATATGAGAAATGAAAT      | 14239 |
| 14240 | ATTAATCTATCCAGAGTGAATGTAAT | CTTGTGTGTGTTAATATCATTGTCATTTTCAATAA    | 14308 |
| 14309 | ATTAATCTATCCAGAGTGAATGTAAT | ATGATATATAGCAACTGTAAAAATGCTTCCCT       | 14372 |
| 14373 | ATTAATCTATCCAGAGTGAATGTAAT | GAAACAAACAAAAATATTGTTTTAATTTTGACAA     | 14437 |
| 14438 | ATTAATCTATCCAGAGTGAATGTAAT | AACCTAACATTTGTTGATAATTTGTATTAATAAATC   | 14505 |
| 14506 | ATTAATCTATCCAGAGTGAATGTAAT | AATGGTAATATTAGTGTCGATAATTTAAAGAAATTA   | 14571 |
| 14572 | ATTAATCTATCCAGAGTGAATGTAAT | ACATAGTACCTAGTTTTCAATTTCTTTAAATA       | 14636 |
| 14637 | ATTAATCTATCCAGAGTGAATGTAAT | CTATATCAATTATATTATACATTATCTCAATTAACAAA | 14704 |
| 14705 | ATTAATCTATCCAGAGTGAATGTAAT | ACAGTAAATGTTTTGAAAACTTGAACCTTTACAACCA  | 14773 |
| 14774 | ATTAATCTATCCAGAGTGAATGTAAT | AAATCAAGTGGTAATACAGATTGGCAAAAAAGTTAAC  | 14839 |



|       |                                 |                                        |       |
|-------|---------------------------------|----------------------------------------|-------|
| 14840 | ATTAAAATCTATCCAGAGTGGAAATGTAAAT | TTAGTAAATGAAATTAGTCACATAGATAATTTTGT    | 14904 |
| 14905 | ATTAAAATCTATCCAGAGTGGAAATGTAAAT | TTTAAATCTTTATAACAAGTATATAATACATTTATA   | 14970 |
| 14971 | ATTAAAATCTATCCAGAGTGGAAATGTAAAT | TACTACAAGTTAATGTATAATCTTGTATAGTTTATAG  | 15037 |
| 15038 | ATTAAAATCTATCCAGAGTGGAAATGTAAAT | ATGGCAATACGAAAAGGTCAAGTTTTCAAAGTTTAAAT | 15106 |
| 15107 | ATTAAAATCTATCCAGAGTGGAAATGTAAAT | TTTATTTAAGTGACCGTAAACTGATAAATATTTAT    | 15171 |
| 15172 | ATTAAAATCTATCCAGAGTGGAAATGTAAAT | GAACAACTTGAAAATGGATAATAAATATTACCAAATT  | 15238 |
| 15239 | ATTAAAATCTATCCAGAGTGGAAATGTAAAT | TATGGTAAATACAGTATCGATAATCTTAAAAAATTAA  | 15305 |
| 15306 | ATTAAAATCTATCCAGAGTGGAAATGTAAAT | TACTCATTTTTTGAAAAGCTTGTAATCTCTAAAC     | 15371 |
| 15372 | ATTAAAATCTATCCAGAGTGGAAATGTAAAT | TGAATATTAACATATATAAAGTGAACCCATCTTTTAT  | 15439 |
| 15440 | ATTAAAATCTATCCAGAGTGGAAATGTAAAT | AAGAAATAATTTATTGAGGAATGGTGCTAAAAAAGA   | 15506 |
| 15507 | ATTAAAATCTATCCAGAGTGGAAATGTAAAT | TTAGTAAACGAAATATCACATATAGACAATTTTAT    | 15571 |
| 15572 | ATTAAAATCTATCCAGAGTGGAAATGTAAAT | GATAGTATTGACCCTTTATTTAGAAAAAATGTTAAA   | 15639 |
| 15640 | ATTAAAATCTATCCAGAGTGGAAATGTAAAT | ACAATAAAATTTATTGAATTTTATGATATGATTGA    | 15704 |
| 15705 | ATTAAAATCTATCCAGAGTGGAAATGTAAAT |                                        | 15769 |
| 15770 | ATTAAAATCTATCCAGAGTGGAAATGTAAAT | CTAAATGTTCCGTCAAATTTACGACTCTAGTTTTGTT  | 15838 |
| 15839 | ATTAAAATCTATCCAGAGTGGAAATGTAAAT | GAATTTATGTGGGACGATTTCTAGCAGTTGTGA      | 15903 |
| 15904 | ATTAAAATCTATCCAGAGTGGAAATGTAAAT | ACACCAAAGTAGCTTTTTTAAATCATATCCC        | 15967 |
| 15968 | ATTAAAATCTATCCAGAGTGGAAATGTAAAT | TCTGGATTGTGGGTTAATATCGTCAGCTATTTTAC    | 16034 |
| 16035 | ATTAAAATCTATCCAGAGTGGAAATGTAAAT | TTTATCTGAAAAAATGTTGAATTTAAATGGATAT     | 16100 |
| 16101 | ATTAAAATCTATCCAGAGTGGAAATGTAAAT | AATTTCCACGCCAAAAAAGCCCTGCGATTCCAA      | 16164 |
| 16165 | ATTAAAATCTATCCAGAGTGGAAATGTAAAT | TCCATACCCAATAGTGAATTTGCAACGCAAAAG      | 16230 |
| 16231 | ATTAAAATCTATCCAGAGTGGAAATGTAAAT | ATTTTAATTTGAATAGAGGGTAAATGTTTCATCTTAA  | 16297 |
| 16298 | ATTAAAATCTATCCAGAGTGGAAATGTAAAT | ATTTAATTATGTGTGCTACATCAACTATTTACTCATT  | 16364 |
| 16365 | ATTAAAATCTATCCAGAGTGGAAATGTAAAT | AGTTTTGTCCAGATTTTATTACAAATACTAACCA     | 16429 |
| 16430 | ATTAAAATCTATCCAGAGTGGAAATGTAAAT | GTTTTAGCAAATCCTCCGTAAAATTGATAAAATTTTGT | 16498 |
| 16499 | ATTAAAATCTATCCAGAGTGGAAATGTAAAT | GAATATCAGCTAAAAGCGTCTAAGAAATGGTATAA    | 16563 |
| 16564 | ATTAAAATCTATCCAGAGTGGAAATGTAAAT | TAAATCTAAATAAATTTCAAATTCATATACTCT      | 16627 |
| 16628 | ATTAAAATCTATCCAGAGTGGAAATGTAAAT | AAAGTTGAATATTATAACACGCTTGAGTTAATGAAC   | 16693 |
| 16694 | ATTAAAATCTATCCAGAGTGGAAATGTAAAT | ATATTAATGGTATATATTTGCTATTCAACCTCTG     | 16759 |
| 16760 | ATTAAAATCTATCCAGAGTGGAAATGTAAAT | ATAAATCGTTATATTTAACCCTAAATCAATACTTT    | 16825 |
| 16826 | ATTAAAATCTATCCAGAGTGGAAATGTAAAT | ATTGCACGTGAAATATTAGCACATAAGTTTTTCATC   | 16891 |
| 16892 | ATTAAAATCTATCCAGAGTGGAAATGTAAAT | CTTTATAGTATAATTTTATAAGTTAAAGTGAGT      | 16957 |
| 16958 | ATTAAAATCTATCCAGAGTGGAAATGTAAAT | GAATTTTGTTTTCGTTTTAAAAATAATTTAATTA     | 17023 |
| 17024 | ATTAAAATCTATCCAGAGTGGAAATGTAAAT | ATAAGAAAAAATATTATACAACGTAATTATATCACG   | 17089 |
| 17090 | ATTAAAATCTATCCAGAGTGGAAATGTAAAT | GAATTTTTGTTTTCGTTTTAAAAATAATTTAATTTAG  | 17156 |
| 17157 | ATTAAAATCTATCCAGAGTGGAAATGTAAAT | CAACGAACAAAAAGAAGATGGAACAAGCAAGGTTAA   | 17222 |
| 17223 | ATTAAAATCTATCCAGAGTGGAAATGTAAAT | TTTTTTGGGAAAATGTGAATTTGTTTTGTTTTTTC    | 17287 |
| 17288 | ATTAAAATCTATCCAGAGTGGAAATGTAAAT | ATCTCTAGAATTAACAAGATCTGACACTCATCAA     | 17352 |
| 17353 | ATTAAAATCTATCCAGAGTGGAAATGTAAAT | CAAGAAACACCATTTGGAATAGTTATAGACGTTA     | 17417 |
| 17418 | ATTAAAATCTATCCAGAGTGGAAATGTAAAT | TAATTAGATACCACCTATCATATCATTTTCTTTATT   | 17483 |

|       |                                |                                          |       |
|-------|--------------------------------|------------------------------------------|-------|
| 17484 | ATTAAAATCTATCCAGAGTGGAATGTAAAT | ATGAATATAAAGATTATAAAAATAGTAATAAGAGAT     | 17548 |
| 17549 | ATTAAAATCTATCCAGAGTGGAATGTAAAT | ATTTAACCTAATACTTTATCTTATAACTATTAT        | 17612 |
| 17613 | ATTAAAATCTATCCAGAGTGGAATGTAAAT | ATCGTTGCCCTTACGTGTTTTTGACAAGTGAAGAAA     | 17678 |
| 17679 | ATTAAAATCTATCCAGAGTGGAATGTAAAT | GACGAAAAATACAAAGGTATTATATTTACTACTA       | 17742 |
| 17743 | ATTAAAATCTATCCAGAGTGGAATGTAAAT | ATATATAATAAAACATATGTCAACTATGGGGGCAA      | 17807 |
| 17808 | ATTAAAATCTATCCAGAGTGGAATGTAAAT | GAATTTTCGACTCTCATAATCTCTTTAAAGTCTCAT     | 17874 |
| 17875 | ATTAAAATCTATCCAGAGTGGAATGTAAAT | TTGTAAGTGTGTCCAGCTTTTAAGATATATTGAAATAA   | 17942 |
| 17943 | ATTAAAATCTATCCAGAGTGGAATGTAAAT | TTTGTTATTAATTTGTGGCGTAACTATGTCTTAA       | 18007 |
| 18008 | ATTAAAATCTATCCAGAGTGGAATGTAAAT | CTTAAAAGACATTAAGAGGGATTAATAATAGATGG      | 18073 |
| 18074 | ATTAAAATCTATCCAGAGTGGAATGTAAAT | ATTAATGACATAATCAAATTTACACGAAGAACGTT      | 18138 |
| 18139 | ATTAAAATCTATCCAGAGTGGAATGTAAAT | TTAAAAGTGAATGAAATGTTTGTGTGCAAGATAT       | 18203 |
| 18204 | ATTAAAATCTATCCAGAGTGGAATGTAAAT | ATGTTTTAATAGCGAATTCAAAAAGTTGTTTGA        | 18267 |
| 18268 | ATTAAAATCTATCCAGAGTGGAATGTAAAT | ACATATTTAAAAGTAAATAAGCAATTCTGTGAAAGA     | 18333 |
| 18334 | ATTAAAATCTATCCAGAGTGGAATGTAAAT | GCTATTATGCTAAATTATCCTTTACCTGTGGATA       | 18398 |
| 18399 | ATTAAAATCTATCCAGAGTGGAATGTAAAT | ATAGACTCTTTAAATACCTTGAATATCTTCATT        | 18463 |
| 18464 | ATTAAAATCTATCCAGAGTGGAATGTAAAT | TCCAAAACCTCGTTTTGAAAATCAAGCAGGTGTCCCT    | 18529 |
| 18530 | ATTAAAATCTATCCAGAGTGGAATGTAAAT | AGAACAGTTGTTGATACAGTAGAAGAAAGTACAAC      | 18594 |
| 18595 | ATTAAAATCTATCCAGAGTGGAATGTAAAT | ATCATTGATAAAAATGCAAAATGAAATTAATAACAA     | 18659 |
| 18660 | ATTAAAATCTATCCAGAGTGGAATGTAAAT | ACAAATCCTGATGGCTCTTGCCATCATTACCAC        | 18723 |
| 18724 | ATTAAAATCTATCCAGAGTGGAATGTAAAT | AAAGACAGTAACACGATTTATTCATTACGGAGTAG      | 18789 |
| 18790 | ATTAAAATCTATCCAGAGTGGAATGTAAAT | ATTTTTGATTTACATGTCATGGCAAGGTTACAAT       | 18854 |
| 18855 | ATTAAAATCTATCCAGAGTGGAATGTAAAT | ATTTCTCCGACTTCCAATGTTGGTTGCTTACGAATAA    | 18921 |
| 18922 | ATTAAAATTTAACCAGAGTGGAATGTAAAT | TTACACAGAAAAGTACTAACAATGCGACTGACTGG      | 18987 |
| 18988 | ATTAAAATTTAACCAGAGTGGAATGTAAAT | AAGAACAATTGTGTCGGAATAGGTAAGTTTCCTGATA    | 19054 |
| 19055 | ATTAAAATTTAACCAGAGTGGAATGTAAAT | GATGGAGTGGAGGCTTTTATGTTTTTGATATATCTAT    | 19121 |
| 19122 | ATTAAAATTTAACCAGAGTGGAATGTAAAT | ATTTAAACTAAAGGAAGTGAGGATATGCAACAAAC      | 19186 |
| 19187 | ATTAAAATTTAACCAGAGTGGAATGTAAAT | GTTGGCTTGGGAATTGCAGGTGCTTTTTGGCTTGGAA    | 19254 |
| 19255 | ATTAAAATCTACCCAGAGTGGAATGTAAAT | TTCTCAACATCAATCAAATTCAGTGTAGCTTTGA       | 19318 |
| 19319 | ATTAAAATCTACCCAGAGTGGAATGTAAAT | GGGAAAACCTGGTGCAACTGGACCATAAGGACCACCAGGG | 19387 |
| 19388 | ATTAAAATTTAACCATAGTGGAATGTAAAT | AGTACTACATCTTCTACATCATAAAAAATCTTTTGC     | 19452 |
| 19453 | ATTAAAATCTACTCATACTGAAATGTAAAT | ACGATTAGTGGTATTGATAAGGATATGGGAGTAGT      | 19517 |
| 19518 | ATTAAAATTTAACCAAAGTGGAATGTAAAT |                                          | 19547 |

"*F. nericia*" CCUG54800: none



"F. nericia" T151023: DR length: 30

Number of spacers: 61

|       |                                 |                                        |       |
|-------|---------------------------------|----------------------------------------|-------|
| 11514 | ATTTACATTCCAATATGGGTAAATTTTAAT  | CACAATATGAATTAGATCCTTACTAGGTACAAGG     | 11578 |
| 11579 | ATTTACATTCCACTCTGGGTAAATTTTAAT  | CGTCGTTTGTATCATAATAGCCCAATCTACATA      | 11642 |
| 11643 | TTTACATTCCATTCTGGTTAAACTTTAAT   | ACAACACCGAAAGCATTGTTCTTTTTATGTCTCG     | 11707 |
| 11708 | ATTTACATTCCATTCTGGTTAAATTTTAAT  | AATAAGAGGTGTTAAATAGTGATATATCTTTTTAC    | 11772 |
| 11773 | ATTTACATTCCACTCTGGTTAAATTTTAAT  | ATATGAACAAGTATTACAGAAAACACAAAACAATGGT  | 11839 |
| 11840 | ATTTACATTCCATTCTGGTTAAATTTTAAT  | GACATAAAGGCAACGCTCGGAACAGTCGCTCCAGT    | 11904 |
| 11905 | ATTTACATTCCAATCTGGGTAAATTTTAAC  | GATATGGCTGAAAAGTATTTGGGAAATGGCAGACGA   | 11970 |
| 11971 | ATTTACATTTCAATATGAGTAGATTTTAAT  | GTAATGATTGATAAGTAGTATCTAAAATATCATC     | 12035 |
| 12036 | CTTTACATTTCAATATGAGTAGATTTTAAT  | GCAATTATCCAGTCGCCTGGCTTGATGTCAATCTC    | 12100 |
| 12101 | TTTACATTTCAATATGAGTAGATTTTAAT   | CTGATACGGGCACITTTCTTTTCAGACTTCCAACGC   | 12166 |
| 12167 | TTTACATTTTCAGTATGAGTAGATTTTAAT  | TAATAAATTAATCCGCCAATACCTGCGAATATCAAA   | 12232 |
| 12233 | ATTTACATTTTCAGTATGAGTAGATTTTAAT | TACAGATAGTTCTAGTAATCTCAAGTATTAATTTAG   | 12301 |
| 12302 | ATTTACATTTTCAGTATGAGTAGATTTTAAT | CTTGTGCTATGATATAAGCTTTTTGGTATTCTTCATCA | 12369 |
| 12370 | ATTTACATTTTCAGTATGAGTAGATTTTAAT | TAGAATAGAGGTAATAATATGATATATCTTTTTAC    | 12434 |
| 12435 | ATTTACATTTTCAGTATGAGTAGATTTTAAT | TTTAGCATGATTTTCATCAAGTGTTCATTTTTGCT    | 12499 |
| 12500 | ATTTACATTTTCAGTATGAGTAGATTTTAAT | GCAAGTGCTGAAGAAATCGCAGGAGTTCAGAAGCGGC  | 12567 |
| 12568 | ATTTACATTTTCAGTATGAGTAGATTTTAAT | CAATTTTGTACAGATTCGACAATAATATATAGCC     | 12635 |
| 12636 | ATTTACATTTTCAGTATGAGTAGATTTTAAT | TACTACAGATAAAAAACGCAAAAAGTTTTCTGAAC    | 12701 |
| 12702 | ATTTACATTTTCAGTATGAGTAGATTTTAAT | AAGACAGTAACACGATTTATTTTCATAACGGAGTAGT  | 12767 |
| 12768 | ATTTACATTTTCAGTATGAGTAGATTTTAAT | GGACTTGAAAAAGAGTTGACGTATTCAAGCACTAG    | 12832 |
| 12833 | ATTTACATTTTCAGTATGAGTAGATTTTAAT | AAACTAACAAGGTTGCACTCTCAAGTGCAAGTGA     | 12897 |
| 12898 | ATTTACATTTTCAGTATGAGTAGATTTTAAT | GAGGTTAGATTTATGTTTAAGATTGAAAGAAAAGA    | 12962 |
| 12963 | ATTTACATTTTCAGTATGAGTAGATTTTAAT | TGAAGAAGATCATTACATCAAGCCAATCCAAAAAT    | 13027 |
| 13028 | ATTTACATTTTCAGTATGAGTAGATTTTAAT |                                        | 13092 |
| 13093 | ATTTACATTTTCAGTATGAGTAGATTTTAAT | CTTATTTGCATAAGTGTTCATATCTTACCTACATAG   | 13159 |
| 13160 | ATTTACATTTTCAGTATGAGTAGATTTTAAT | CAAATAAACTTGTGAATTTGTAAGAGCCTTGTCTTC   | 13226 |
| 13227 | ATTTACATTTTCAGTATGAGTAGATTTTAAT | CTCAACTCAATGGGAGATGCAATGACTGCATCATC    | 13293 |
| 13294 | ATTTACATTTTCAGTATGAGTAGATTTTAAT | GATTGGATTAATTCCTTACTCAGCACAGAAAAT      | 13357 |
| 13358 | ATTTACATTTTCAGTATGAGTAGATTTTAAT | CACAGATAATACCATGTTTTAAGTTACAGATCA      | 13421 |
| 13422 | ATTTACATTTTCAGTATGAGTAGATTTTAAT | GTAGTTTCCCAAAAACCTCGTCTATGTTTGCAAATGA  | 13487 |
| 13488 | ATTTACATTTTCAGTATGAGTAGATTTTAAT | TAGCTTCTGGCTATTAACITTTGATGCTTSC        | 13551 |
| 13552 | ATTTACATTTTCAGTATGAGTAGATTTTAAT | GCAATGAGTTCAGTAGGTATTGAAGCTGAAGCAGG    | 13616 |
| 13617 | ATTTACATTTTCAGTATGAGTAGATTTTAAT | TACCATCAAGTTACGAAGTCTCCAATGTAGTCGCTC   | 13682 |
| 13683 | ATTTATATTTTCAGTATGAGTAGATTTTAAT | CGTCTGAATCCCTTTGATTTATTGATAAAGAGTTG    | 13747 |
| 13748 | ATTTACATTTTCAGTATGAGTAGATTTTAAT | GAAAAGATATGGGTCTATATATTGTTCCGGGGGT     | 13813 |
| 13814 | ATTTACATTTTCAGTATGAGTAGATTTTAAT | AAATAATCAGTTTTTCATTGTTCTGAAGGTTAATTTT  | 13879 |
| 13880 | ATTTACATTTTCAGTATGAGTAGATTTTAAT | CAGATAGTGTCTACATCTGTTTCTCAAAGCAT       | 13943 |
| 13944 | ATTTACATTTTCAGTATGAGTAGATTTTAAT | GTCAATTCCTTCATGAATTGCAAGTGGCGCTTCATA   | 14009 |
| 14010 | ATTTACATTTTCAGTATGAGTAGATTTTAAT | TGAGGATATGAGGGTCAAAGGAATTTCTGATTTAAC   | 14075 |

|       |                                 |                                       |       |
|-------|---------------------------------|---------------------------------------|-------|
| 14076 | ATTTACATTT CAGTATGAGTAGATTTTAAT | GCTGTGAGGTTTGTGTTTCGCCCATGTCTATCA     | 14139 |
| 14140 | ATTTACATTT CAGTATGAGTAGATTTTAAT | CGAGACACTGGTGGTCGTGGTGAAGTTACAATCAA   | 14204 |
| 14205 | ATTTACATTT CAGTATGAGTAGATTTTAAT | ACACGAAGAGCCTAGTTTATAGGCCTTTTCTTAGG   | 14271 |
| 14272 | ATTTACATTT CAGTATGAGTAGATTTTAAT | AGATATTATCATCATAATCGTCATCTCCACGATG    | 14337 |
| 14338 | ATTTACATTT CAGTATGAGTAGATTTTAAT | ATGGCTGCTGTGGATACATTTTTGGTACTATATT    | 14402 |
| 14403 | ATTTACATTT CAGTATGAGTAGATTTTAAT | TATACAATATTTTGTAGATTTTGCAGTAAGTTATCT  | 14468 |
| 14469 | ATTTACATTT CAGTATGAGTAGATTTTAAT | TGTTTAATTCTCGAGACTGGCAAGCATGTAAAAAC   | 14533 |
| 14534 | ATTTACATTT CAGTATGAGTAGATTTTAAT | GCATAGAATAGAGGGAAAGATGATTTATTTATTTAC  | 14599 |
| 14600 | ATTTACATTT CAGTATGAGTAGATTTTAAT | TTTAATAATCGTCTTCTTTTAATTGTTATGAAAA    | 14664 |
| 14665 | ATTTACATTT CAGTATGAGTAGATTTTAAT | CCCTGCTGCAATTAAGACCAACTCACATCTTCTGC   | 14730 |
| 14731 | ATTTACATTT CAGTATGAGTAGATTTTAAT | TTATTAACCTTGATTGTGAAGTCTTTAACAGA      | 14793 |
| 14794 | ATTTACATTT CAGTATGAGTAGATTTTAAT | GTGTGAAAGGAAGTTAATATGGAGAATTTATTAAT   | 14858 |
| 14859 | ATTTACATTT CAGTATGAGTAGATTTTAAT | CCAACATCAGTCTTTTAATCATTGCTTGAAGT      | 14923 |
| 14924 | ATTTACATTT CAGTATGAGTAGATTTTAAT | TGGCATTGTTATAAGTTCGTGAGTCTGGAAACTC    | 14989 |
| 14990 | ATTTACATTT CAGTATGAGTAGATTTTAAT | GATGGATAAATTGCTCTGGTAGTGTGAGACTCGAAA  | 15055 |
| 15056 | ATTTACATTT CAGTATGAGTAGATTTTAAT | TCACCTGATCATTAGTTTATATATGATAGTAA      | 15120 |
| 15121 | ATTTACATTT CAGTATGAGTAGATTTTAAT | AATTAGTAGTACTTTAGATAATAAACTACGAAATA   | 15185 |
| 15186 | ATTTACATTT CAGTATGAGTAGATTTTAAT | TGCCTATATCTGAAATGGTGGAAATTTTGATTTA    | 15250 |
| 15251 | ATTTACATTT CAGTATGAGTAGATTTTAAT | TCTTCGGTGGTGGATTCAAAGAAAACTATCGGCTAT  | 15317 |
| 15318 | ATTTACATTT CAGTATGAGTAGATTTTAAT | TTGGAAAGCTTGGCAAGATTAAGATGAAATTAAT    | 15381 |
| 15382 | ATTTACATTT CAGTATGAGTAGATTTTAAT | ATATGTTGGACAAAGGACACACTTTTGATTATATCTT | 15448 |
| 15449 | ATTTACATTT CAGTATGAGTAGATTTTAAT | TCGGCTTTGGATAAAACATTTCTCGGTTATATAAAC  | 15514 |
| 15515 | ATTTACATTT CAGTATGAGTAGATTTTAAT |                                       | 15544 |

**"F. nericia" T160124: DR length: 31**

**Number of spacers: 14**

|       |                                 |                                      |       |
|-------|---------------------------------|--------------------------------------|-------|
| 49457 | GATTTACATTTCACTCTGGGTAGATTTTAAT | AATAGTTGCGCCAACATACTCAACACTACTAATAC  | 49522 |
| 49523 | TATTTACATTTCACTCTGGGTAGATTTTAAT | TTACTAGAAGCTATCTGAACATAAATGTCGAAGA   | 49587 |
| 49588 | CATTTACATTTCACTCTGGTTAAATTTTAAT | CATTTCTGCTGCTGCTTATTATCAGGTCTATAG    | 49653 |
| 49654 | TATTTACATTTCACTCTGGTTAAATTTTAAT | GTATAATAAATCCAGCTGATCTCCCTCTATATG    | 49721 |
| 49722 | ACTTTACATTTCACTCTGGTTAAATTTTAAT | TCAAATTGGATCATGGTTTGAAGTAAATTCAAAA   | 49787 |
| 49788 | CCTTTACATTTCACTCTGGTTAAATTTTAAT | CCGATTAATTCAAGTCCTTTGTTACCTCTTTTG    | 49852 |
| 49853 | TATTTACATTTCAATATGGTTAGATTTTAAT | AATGATATGCGGTGTACAAAGATGACAAGTTTGAGT | 49919 |
| 49920 | TATTTACATTTCAATATGGTTAGATTTTAAT | GAGAGGCCGAAGAAAAGGAAGAGGTCTTGTAATG   | 49985 |
| 49986 | TATTTACATTTCAATATGGTTAGATTTTAAT | TCGCTTTCGAGTATCCACAGTCAAGTATGCTCCAA  | 50052 |
| 50053 | TATTTACATTTCAATATGGTTAGATTTTAAT | CTAATCTTCAAGTATTTCTGGGAGCTGTTCGA     | 50116 |
| 50117 | GATTTACATTTCAATATGGTTAGATTTTAAT | TTCATGAGTGCAGCACATGTGTCCAGTACTGT     | 50181 |
| 50182 | AATTTACATTTCAATATAGTTAGATTTTAAT | GACAAAAACGCAAAAAGCTTTTTGAATCTAGATA   | 50246 |



|       |                                |                                    |       |
|-------|--------------------------------|------------------------------------|-------|
| 50247 | CATTACATTCCAATATGGTTAGATTTTAAT | AATACACGTCCGATGTAGTTTTCTTCGGCGAAAA | 50311 |
| 50312 | TATTACATTCCAATATGGTTAGATTTTAAT | AGAGCACCTTATAAGTTGATACTCAATTCAACTT | 50376 |
| 50377 | AATTACATTCCAATATGGTTAGATTTTAAT |                                    | 50407 |

**"F. nericia" ATCC53516: DR length: 30      Number of spacers: 87**

|        |                                 |                                       |        |
|--------|---------------------------------|---------------------------------------|--------|
| 985861 | ATTTAAATTCATTCTGGTAAGATTTTAAT   | CAATTGTAACAGACTACAACGTATAGCTTTGATAA   | 985926 |
| 985927 | ATTTACATTCCACTCTGGGTAGATTTTAAT  | CCAATTTTTGTTTACCTTTTTCAAAAAAGTTACCTTT | 985993 |
| 985994 | ATTTACATTCCACTCTGGATAGATTTTAAT  | CTGGACAAGATAAGTTAACCATATTAGCAGAAATATT | 986060 |
| 986061 | ATTTACATTCCACTATGGTTAAATTTTAAT  | AACAGTGGATCTTTTTCTTTACTTTTGTA AACAT   | 986125 |
| 986126 | ATTTACATTTTCAGTATGAGTAGATTTTAAT | TCCACCAAATACAACGCAGTGTCCCTCTTTTCTTC   | 986191 |
| 986192 | ATTTACATTTTCAGTATGAATAGATTTTAAT | AGCGTATCAAGAAATACGATATTTGGATAGCTCAC   | 986256 |
| 986257 | ATTTACATTTTCAGTATGAGTAGATTTTAAT | TAGCGCGGGTAAGGCTATAATTGATGGATTCTTAAA  | 986322 |
| 986323 | ATTTACAATTCAGTATGAGTAGATTTTAAT  | CCTAAATCTAACCCGTCAACGGTAACCGCCTTAT    | 986388 |
| 986389 | ATTTACATTTTCAGTATGAGTAGATTTTAAT | AGACACTTGAGAAAAATCAAGTGAAAGGAGAAATA   | 986454 |
| 986455 | ATTTACATTCCACTCTGGGTAGATTTTAAT  | ATTAATCGTGAAATTGACAAAGGCCAAAACATTAAC  | 986519 |
| 986520 | ATTTACATTCCACTCTGGGTAGATTTTAAT  | TCTGTACTATAACCCCTGATCTGTAATTTAAAATT   | 986584 |
| 986585 | ATTTACATTCCACTCTGGGTAGATTTTAAT  | CGAATTGGAATGGGTAATATTCTAGGTGGAACACT   | 986649 |
| 986650 | ATTTACATTCCACTCTGGGTAGATTTTAAT  | TGATAGCAACGACTTGCAGAATATCACAATTGTGCA  | 986715 |
| 986716 | ATTTACATTCCACTCTGGGTAGATTTTAAT  | TAGGTCTTATTGTTCTAGAGATATCAGAATCGATATC | 986782 |
| 986783 | ATTTACATTCCACTCTGGATAGATTTTAAT  | GTTTCGATACCTAATCCAACCTACGCCGATGTTGTC  | 986847 |
| 986848 | ATTTACATTCCACTGTGGTTAAATTTTAAT  | TTTAGGAACAGTAGCACCTGTCGGCTTGGGAATTGC  | 986913 |
| 986914 | ATTTACATTTTCAGTATGAGTAGATTTTAAT | CAATTCGAATAGTAAGGCTTGGTAGGGCTATGG     | 986978 |
| 986979 | ATTTACATTTTCAGTATGAATAGATTTTAAT | GCATAAGCTTCAGAACTCTATAGTCTTCCAACT     | 987043 |
| 987044 | CTTTACATTTTCAGTATGAATAGATTTTAAT | TCCAATCGCAACTTTTGTGCGATCACGTATTGGTA   | 987109 |
| 987110 | CTTTACATTTTCAGTATGAATAGATTTTAAT | AACGAATATGAGATGGACAAAAAAGACGATGAGAA   | 987174 |
| 987175 | CTTTACATTTTCAGTATGAATAGATTTTAAT | TGCGTTAAAGCAATTTGCTATTACTTCTCTTTGGA   | 987240 |
| 987241 | CTTTACATTTTCAGTATGAATAGATTTTAAT | ATTGAAGTAATCTTGATGTTTTCTTGAGCTAATAT   | 987306 |
| 987307 | CTTTACATTTTCAGTATGAATAGATTTTAAT | GGACGAATTGTCAATATGCAATTAGCACTATATCAGA | 987373 |
| 987374 | CTTTACATTTTCAGTATGAATAGATTTTAAT |                                       | 987437 |
| 987438 | CTTTACATTTTCAGTATGAATAGATTTTAAT | TCAATGAATCATCTAGCCCTTTTATATCCACTCTAA  | 987503 |
| 987504 | CTTTACATTTTCAGTATGAATAGATTTTAAT | GATATGAGCGATGAAAACCTCGGAGCAAATTTGAG   | 987568 |
| 987569 | CTTTACATTTTCAGTATGAATAGATTTTAAT | GGTTTTAGTTATGATTTATCTTTTTACTGGTACTCC  | 987634 |
| 987635 | CTTTACATTTTCAGTATGAATAGATTTTAAT | AATGGAAATTTTTCTTTTATAATCAAATTTTTTA    | 987698 |
| 987699 | ATTTACATTTTCAGTATGAATAGATTTTAAT | GCAGTGTCTTATACCTCTGCATACTGGGCTAACGT   | 987765 |
| 987766 | ATTTACATTTTCAGTATGAATAGATTTTAAT | GTTTTGTGCTTTAATTTCAACAGTATCACATGCTAG  | 987832 |
| 987833 | ATTTACATTCCAGTATGATTAGATTTTAAT  | TCGATATGTTAGTACTCACTAATTAAGATAT       | 987898 |
| 987899 | ATTTACATTCCAGTATGATTAGATTTTAAT  | AGTGTTCGTA AATAGTAGAGAAGCAATATTAAGTT  | 987963 |

|        |                               |                                       |        |
|--------|-------------------------------|---------------------------------------|--------|
| 987964 | ATTACATTCCAGTATGATTAGATTTAAT  | ATAAACTCAGAATTTTTACTTATAAAAAAAGCT     | 988028 |
| 988029 | ATTACATTCCAGTATGATTAGATTTAAT  | GGTTTAAATTATGCTTTGAGATTAT             | 988084 |
| 988085 | TAAAACATTCCAGTATGATTAGATTTAAT | TTTTTGTGCTTTACTTGCTACAGTAAGCCATGCGAG  | 988150 |
| 988151 | ATTACATTCCATTCTGGTTGGATTTAAT  | AATGATTGGTGGAGGAGTTCTATTAATCGTAATGGC  | 988216 |
| 988217 | ATTACATTCCATTCTGGTTGGATTTAAT  | TCTACAAAAAAGTTGGTAGCACATCAACATTTGT    | 988282 |
| 988283 | ATTACATTCCATTCTGGTTGGATTTAAT  | CTTTTTAAGTGCAGATTGATTCCTTCGGAACGTC    | 988349 |
| 988350 | ATTACATTCCATTCTGGTTGGATTTAAT  | TGCGACTGGTGCAGGATATTTCTATGAGTTGAAGTC  | 988415 |
| 988416 | ATTACATTCCATTCTGGTTGGATTTAAT  | TATCAACATTAAGCGTGTTCGTTACTACTTTTAG    | 988482 |
| 988483 | ATTACATTCCATTCTGGTTGGATTTAAT  | TATAATAGTTTGATAAAATTTCAAGAGGAGTATCAA  | 988549 |
| 988550 | ATTACATTCCATTCTGGTTGGATTTAAT  | AATAAGTGATTCGCAATGAAAGTCAGTGAGACAAC   | 988615 |
| 988616 | ATTACATTCCATTCTGGTTGGATTTAAT  | TCTGATAATTTACTTTATGTTGTTTCATAAAGGC    | 988681 |
| 988682 | ATTACATTCCACTCTGGGTAGATTTAAT  | TAATTTTTGCAAGTTGGTCTAAGTCTTTGGAATTTTT | 988748 |
| 988749 | ATTACATTCCACTCTGGGTAGATTTAAT  | TATAAAAACTTTAATACATCATAAGAATAAAAA     | 988813 |
| 988814 | ATTACATTCCACTCTGGGTAGATTTAAT  | AGAATAGGAGGAAAACTTTGATATATCTTTTAC     | 988877 |
| 988878 | ATTACATTCCACTCTGGGTAGATTTAAT  | ATGTGAACCTACCATCATCTTCTACGCATAAGCCTC  | 988944 |
| 988945 | ATTACATTCCACTCTGGGTAGATTTAAT  | AAAGAAATACAGCCGTTAAAGTATGATTGGGAGTATA | 989011 |
| 989012 | ATTACATTCCACTCTGGGTAGATTTAAT  | CATCCATCATTTGTTGAATTTTCAAAGCATTGATA   | 989076 |
| 989077 | ATTACATTCCACTCTGGGTAGATTTAAT  | TCCGTTTAGTCGATAAAAAGTAAACTCGCTGTTTTC  | 989142 |
| 989143 | ATTACATTCCACTCTGGGTAGATTTAAT  | TTCATCTTTTTCTTTTTTAACTTATCCTTATAGT    | 989207 |
| 989208 | ATTACATTCCACTCTGGGTAGATTTAAT  | ATGTTTAGGTGGAGATAAATTTTTCAGTTTATAATAA | 989273 |
| 989274 | ATTACATTCCACTCTGGGTAGATTTAAT  | TTATAATTTTAAAGCACATTTCTCTCAATCTTAGGT  | 989340 |
| 989341 | ATTACATTCCACTCTGGGTAGATTTAAT  | GTGAGGTTTTGTATGATTTATTTACTGGAAGTCC    | 989408 |
| 989409 | ATTACATTCCACTCTGGGTAGATTTAAT  | TCTGATGGAGGAGATAATGATATTTATTATTCTGA   | 989473 |
| 989474 | ATTACATTCCACTCTGGGTAGATTTAAT  | CCAAAGCGGCATTTAAAGACTTAAAGGAGAATC     | 989537 |
| 989538 | ATTACATTCCACTCTGGGTAGATTTAAT  | AAAGAATCTCTTCGATTTTCAAGTTAGAACAAC     | 989602 |
| 989603 | ATTACATTCCACTCTGGGTAGATTTAAT  | CAAGCTAAAAAAGCTCCAGCAATCCAAGTCCCAC    | 989667 |
| 989668 | ATTACATTCCACTCTGGGTAGATTTAAT  | CACATCTGCAAGATTTTATCTCTTGATAAATAATATC | 989734 |
| 989735 | ATTACATTCCACTCTGGGTAGATTTAAT  | CCCATAAACTAAAAATTTCAACCATCTCAGATAT    | 989798 |
| 989799 | ATTACATTCCACTCTGGGTAGATTTAAT  | CCAAGCCAAGAAAGCCCCAGCAATTCGAGTCCGAC   | 989864 |
| 989865 | ATTACATTCCACTCTGGGTAGATTTAAT  | AAATGAATCTCTCGCATTTAAGATTAGAACAAC     | 989930 |
| 989931 | ATTACATTCCACTCTGGGTAGATTTAAT  | ATATCATACGGCGATAATGCTAGAGTTACTGAGCT   | 989995 |
| 989996 | ATTACATTCCACTCTGGGTAGATTTAAT  | GATGCAGTCGCGAGTTCAATAAAAAATTTGCGATTTA | 990062 |
| 990063 | ATTACATTCCACTCTGGGTAGATTTAAT  | AGCAAGAAATGTCATTGGCTCACTTGGATTAAGTGT  | 990128 |
| 990129 | ATTACATTCCACTCTGGGTAGATTTAAT  | TTTACCGCATTTTGGAAATGCTTGACCTACAGCCTG  | 990193 |
| 990194 | ATTACATTCCACTCTGGGTAGATTTAAT  | TTTTTCCATGTAATCATTTAACGTCTCTGCTGAATA  | 990259 |
| 990260 | ATTACATTCCACTCTGGGTAGATTTAAT  | AAACTCAAATTATCCCGATAAGTCATTCTTACAAA   | 990325 |
| 990326 | ATTACATTCCACTCTGGGTAGATTTAAT  | CAATGAAAGAGAAAAAACCCTTCTATAAGAAAGTA   | 990390 |
| 990391 | ATTACATTCCACTCTGGGTAGATTTAAT  | ACGCTCTTTTTATCTAAAATTGCGTTGAAATAAAT   | 990456 |
| 990457 | ATTACATTCCACTCTGGGTAGATTTAAT  | TACTACATCAACAGAAAAAGATTACAAAAATATTTGG | 990523 |
| 990524 | ATTACATTCCACTCTGGGTAGATTTAAT  | TCCCTGCGTTGTTTACGTCTGAGTAAGGTAAGTCCG  | 990588 |

|        |                              |                                          |        |
|--------|------------------------------|------------------------------------------|--------|
| 990589 | ATTACATTCCACTCTGGGTAGATTTAAT | TTGAATAATATTTTTAAAGTGTTCAATCTTTTGAT      | 990654 |
| 990655 | ATTACATTCCACTCTGGGTAGATTTAAT | TTAACAGTTGGCGAAAAAATACTATCGAAATTG        | 990718 |
| 990719 | ATTACATTCCACTCTGGGTAGATTTAAT | TTAGATGTTAGTTACAACACATTAGCAAGCTATCGAACAA | 990788 |
| 990789 | ATTACATTCCACTCTGGGTAGATTTAAT | AATGAATCTCTACGCATTTAAGATTTGAACATAT       | 990853 |
| 990854 | ATTACATTCCACTCTGGGTAGATTTAAT | TGAATTTGTTGTATCTGAAACATAAATTATCTAAATT    | 990919 |
| 990920 | ATTACATTCCACTCTGGGTAGATTTAAT | AAGTCTTCATGGCAGTATAAGACGGAAGACGAACAA     | 990985 |
| 990986 | ATTACATTCCACTCTGGGTAGATTTAAT | GATTCATCAAAGATAAAGTATCTTTCAAATCAAA       | 991050 |
| 991051 | ATTACATTCCACTCTGGGTAGATTTAAT | AATCAAAAAGCATTTTTTAAACAACACGTTTGATGT     | 991115 |
| 991116 | ATTACATTCCACTCTGGGTAGATTTAAT | GCACAACCTGAGGATTACTCTGTAAAAGCTAGAAAA     | 991181 |
| 991182 | ATTACATTCCACTCTGGGTAGATTTAAT | TCATAATTAAATCTATCCATGCCGATCGCTTATCAAA    | 991248 |
| 991249 | ATTACATTCCACTCTGGGTAGATTTAAT | TCAAGCTTTTTGCCAAGAAGTCTTTCCTGCTCTG       | 991312 |
| 991313 | ATTACATTCCACTCTGGGTAGATTTAAT | CTCTACTTGACCAGCAGCATTTAATCTTAATTT        | 991376 |
| 991377 | ATTACATTCCACTCTGGGTAGATTTAAT | GTATGATCCAATGAGTTCTCTTTACGAGTCCGT        | 991441 |
| 991442 | ATTACATTCCACTCTGGGTAGATTTAAT | TAGAGCCTTGTTCTTGCTATGATATACGCTTTT        | 991508 |
| 991509 | ATTACATTCCACTCTGGGTAGATTTAAT | TTGGGTAAAAGAAGCGTTAGAAATAGCAATGAAAAA     | 991574 |
| 991575 | ATTACATTCCACTCTGGGTAGATTTAAT |                                          | 991604 |



**Table S3A: Predicted genomic islands in the genome of *F. magna* 07T609**

Shown are genes of genomic islands predicted by IslandViewer4

| Island start | Island end | Length | Gene name  | Locus       | Gene start | Gene end | Strand | Product                                           |
|--------------|------------|--------|------------|-------------|------------|----------|--------|---------------------------------------------------|
| 65901        | 75199      | 9298   | OXZ41700.1 | B9N58_00255 | 65901      | 66770    | 1      | hypothetical protein                              |
| 65901        | 75199      | 9298   | OXZ41701.1 | B9N58_00260 | 66757      | 68745    | 1      | exopolyphosphatase                                |
| 65901        | 75199      | 9298   | OXZ41702.1 | B9N58_00265 | 68726      | 69172    | 1      | 50S ribosomal protein L9                          |
| 65901        | 75199      | 9298   | OXZ41703.1 | B9N58_00270 | 69205      | 70542    | 1      | replicative DNA helicase                          |
| 65901        | 75199      | 9298   | OXZ41704.1 | B9N58_00275 | 70539      | 71102    | 1      | N-acetyltransferase                               |
| 65901        | 75199      | 9298   | OXZ41705.1 | B9N58_00280 | 71107      | 71865    | 1      | DNA replication protein                           |
| 65901        | 75199      | 9298   | OXZ41706.1 | B9N58_00285 | 71868      | 72845    | 1      | DNA replication protein DnaC                      |
| 65901        | 75199      | 9298   | OXZ41707.1 | B9N58_00290 | 72842      | 73486    | 1      | NAD(P)H-hydrate epimerase                         |
| 65901        | 75199      | 9298   | OXZ41708.1 | B9N58_00295 | 73987      | 74529    | 1      | ECF transporter S component                       |
| 65901        | 75199      | 9298   | OXZ41709.1 | B9N58_00300 | 74513      | 75199    | 1      | radical SAM protein                               |
| 185658       | 190851     | 5193   | OXZ41632.1 | B9N58_00840 | 185658     | 186299   | -1     | hemolysin III                                     |
| 185658       | 190851     | 5193   | OXZ41633.1 | B9N58_00845 | 186453     | 186956   | 1      | acetyltransferase                                 |
| 185658       | 190851     | 5193   | OXZ41634.1 | B9N58_00850 | 186956     | 187690   | 1      | hydrolase                                         |
| 185658       | 190851     | 5193   | OXZ41524.1 | B9N58_00855 | 190276     | 190851   | 1      | cell filamentation protein Fic                    |
| 313682       | 318134     | 4452   | OXZ41489.1 | B9N58_01405 | 313682     | 314023   | 1      | plasmid mobilization relaxosome protein MobC      |
| 313682       | 318134     | 4452   | OXZ41490.1 | B9N58_01410 | 314128     | 314343   | 1      | transcriptional regulator                         |
| 313682       | 318134     | 4452   | OXZ41491.1 | B9N58_01415 | 314350     | 315393   | 1      | DNA (cytosine-5-)-methyltransferase               |
| 313682       | 318134     | 4452   | OXZ41492.1 | B9N58_01420 | 315397     | 316479   | 1      | restriction endonuclease                          |
| 313682       | 318134     | 4452   | OXZ41493.1 | B9N58_01425 | 316524     | 318134   | 1      | ABC transporter ATP-binding protein               |
| 733227       | 739719     | 6492   | OXZ41083.1 | B9N58_03590 | 733227     | 733925   | 1      | DNA-binding response regulator                    |
| 733227       | 739719     | 6492   | OXZ41084.1 | B9N58_03595 | 733966     | 734550   | 1      | peptidylprolyl isomerase                          |
| 733227       | 739719     | 6492   | OXZ41085.1 | B9N58_03600 | 734552     | 735184   | 1      | thymidine kinase                                  |
| 733227       | 739719     | 6492   | OXZ41086.1 | B9N58_03605 | 735206     | 735676   | -1     | S-ribosylhomocysteine lyase                       |
| 733227       | 739719     | 6492   | OXZ41087.1 | B9N58_03610 | 735685     | 736788   | -1     | rod shape-determining protein RodA                |
| 733227       | 739719     | 6492   | OXZ41088.1 | B9N58_03615 | 736863     | 737696   | 1      | endonuclease IV                                   |
| 733227       | 739719     | 6492   | OXZ41089.1 | B9N58_03620 | 737677     | 738303   | 1      | endonuclease III                                  |
| 733227       | 739719     | 6492   | OXZ41090.1 | B9N58_03625 | 738371     | 739291   | 1      | aspartate carbamoyltransferase                    |
| 733227       | 739719     | 6492   | OXZ41091.1 | B9N58_03630 | 739291     | 739719   | 1      | aspartate carbamoyltransferase regulatory subunit |
| 756103       | 762234     | 6131   | OXZ41108.1 | B9N58_03715 | 756103     | 757791   | 1      | hypothetical protein                              |
| 756103       | 762234     | 6131   | OXZ41109.1 | B9N58_03720 | 757802     | 758599   | 1      | pyruvate, phosphate dikinase regulatory protein   |
| 756103       | 762234     | 6131   | OXZ41110.1 | B9N58_03725 | 758683     | 760116   | 1      | serine/threonine protein kinase                   |
| 756103       | 762234     | 6131   | OXZ41111.1 | B9N58_03730 | 760118     | 760792   | 1      | protein phosphatase                               |
| 756103       | 762234     | 6131   | OXZ41112.1 | B9N58_03735 | 760849     | 762234   | 1      | MiaB                                              |
| 795264       | 799700     | 4436   | OXZ41144.1 | B9N58_03900 | 795264     | 795599   | -1     | histidine triad nucleotide-binding protein        |
| 795264       | 799700     | 4436   | OXZ41145.1 | B9N58_03905 | 795646     | 796938   | -1     | methylthiotransferase MtaB                        |
| 795264       | 799700     | 4436   | OXZ41146.1 | B9N58_03910 | 796938     | 797663   | -1     | rRNA methyltransferase                            |
| 795264       | 799700     | 4436   | OXZ41147.1 | B9N58_03915 | 797656     | 798582   | -1     | 50S ribosomal protein L11 methyltransferase       |
| 795264       | 799700     | 4436   | OXZ41148.1 | B9N58_03920 | 798582     | 799700   | -1     | molecular chaperone DnaJ                          |
| 954114       | 1006418    | 52304  | OXZ40898.1 | B9N58_04620 | 954114     | 955391   | -1     | ABC transporter permease                          |
| 954114       | 1006418    | 52304  | OXZ40899.1 | B9N58_04625 | 955589     | 955876   | -1     | cupin                                             |
| 954114       | 1006418    | 52304  | OXZ40900.1 | B9N58_04630 | 955944     | 956516   | -1     | uracil-DNA glycosylase                            |
| 954114       | 1006418    | 52304  |            | B9N58_04635 | 956655     | 956857   | -1     | hypothetical protein                              |
| 954114       | 1006418    | 52304  |            | B9N58_04640 | 956885     | 957130   | -1     | hypothetical protein                              |
| 954114       | 1006418    | 52304  |            | B9N58_04645 | 957132     | 957936   | -1     | ABC transporter                                   |
| 954114       | 1006418    | 52304  |            | B9N58_04650 | 957923     | 958642   | -1     | iron ABC transporter permease                     |
| 954114       | 1006418    | 52304  | OXZ40901.1 | B9N58_04655 | 958702     | 959460   | -1     | SAM-dependent methyltransferase                   |
| 954114       | 1006418    | 52304  | OXZ40902.1 | B9N58_04660 | 959555     | 960148   | 1      | transcriptional regulator                         |
| 954114       | 1006418    | 52304  | OXZ40903.1 | B9N58_04665 | 960299     | 960490   | -1     | hypothetical protein                              |
| 954114       | 1006418    | 52304  |            | B9N58_04670 | 960685     | 961231   | 1      | transposase                                       |
| 954114       | 1006418    | 52304  | OXZ40904.1 | B9N58_04675 | 961267     | 962100   | 1      | hypothetical protein                              |
| 954114       | 1006418    | 52304  | OXZ40905.1 | B9N58_04680 | 962331     | 963533   | -1     | ABC transporter substrate-binding protein         |
| 954114       | 1006418    | 52304  | OXZ40906.1 | B9N58_04685 | 963533     | 963958   | -1     | FMN-binding domain-containing protein             |
| 954114       | 1006418    | 52304  | OXZ40907.1 | B9N58_04690 | 963955     | 964674   | -1     | GTPase                                            |
| 954114       | 1006418    | 52304  | OXZ40908.1 | B9N58_04695 | 964686     | 965834   | -1     | ABC transporter permease                          |
| 954114       | 1006418    | 52304  | OXZ40909.1 | B9N58_04700 | 965824     | 967107   | -1     | ABC transporter permease                          |
| 954114       | 1006418    | 52304  | OXZ40910.1 | B9N58_04705 | 967116     | 968378   | -1     | hypothetical protein                              |
| 954114       | 1006418    | 52304  | OXZ40911.1 | B9N58_04710 | 968435     | 969100   | -1     | hypothetical protein                              |
| 954114       | 1006418    | 52304  | OXZ40912.1 | B9N58_04715 | 969110     | 970447   | -1     | iron transporter                                  |
| 954114       | 1006418    | 52304  | OXZ40913.1 | B9N58_04720 | 970450     | 971127   | -1     | ABC transporter ATP-binding protein               |
| 954114       | 1006418    | 52304  | OXZ40914.1 | B9N58_04725 | 971127     | 971522   | -1     | hypothetical protein                              |
| 954114       | 1006418    | 52304  | OXZ40915.1 | B9N58_04730 | 971537     | 971719   | -1     | ferrous iron transporter B                        |
| 954114       | 1006418    | 52304  | OXZ40916.1 | B9N58_04735 | 971967     | 972197   | -1     | ferrous iron transport protein A                  |
| 954114       | 1006418    | 52304  | OXZ40917.1 | B9N58_04740 | 972495     | 972602   | -1     | replication initiator domain protein A            |
| 954114       | 1006418    | 52304  | OXZ40875.1 | B9N58_04745 | 973855     | 974205   | -1     | hypothetical protein                              |
| 954114       | 1006418    | 52304  | OXZ40876.1 | B9N58_04750 | 974230     | 974955   | -1     | ABC transporter permease                          |
| 954114       | 1006418    | 52304  | OXZ40877.1 | B9N58_04755 | 974939     | 975823   | -1     | multidrug ABC transporter ATP-binding protein     |
| 954114       | 1006418    | 52304  | OXZ40878.1 | B9N58_04760 | 975801     | 976043   | -1     | hypothetical protein                              |
| 954114       | 1006418    | 52304  | OXZ40879.1 | B9N58_04765 | 976036     | 976434   | -1     | hypothetical protein                              |
| 954114       | 1006418    | 52304  | OXZ40880.1 | B9N58_04770 | 976565     | 977170   | -1     | DNA-binding response regulator                    |
| 954114       | 1006418    | 52304  | OXZ40881.1 | B9N58_04775 | 977142     | 978689   | -1     | hypothetical protein                              |
| 954114       | 1006418    | 52304  | OXZ40882.1 | B9N58_04780 | 978977     | 979633   | -1     | DNA-binding protein                               |
| 954114       | 1006418    | 52304  | OXZ40883.1 | B9N58_04785 | 979677     | 987320   | -1     | DNA helicase                                      |
| 954114       | 1006418    | 52304  | OXZ40884.1 | B9N58_04790 | 987403     | 989616   | -1     | hypothetical protein                              |
| 954114       | 1006418    | 52304  | OXZ40885.1 | B9N58_04795 | 989652     | 990614   | -1     | DNA (cytosine-5-)-methyltransferase               |

|         |         |       |            |             |         |         |                                                       |
|---------|---------|-------|------------|-------------|---------|---------|-------------------------------------------------------|
| 954114  | 1006418 | 52304 | OXZ40886.1 | B9N58_04800 | 990607  | 992328  | -1 DNA topoisomerase III                              |
| 954114  | 1006418 | 52304 | OXZ40887.1 | B9N58_04805 | 992392  | 993258  | -1 bacteriocin                                        |
| 954114  | 1006418 | 52304 | OXZ40888.1 | B9N58_04810 | 993273  | 995696  | -1 copper amine oxidase                               |
| 954114  | 1006418 | 52304 | OXZ40889.1 | B9N58_04815 | 995683  | 995922  | -1 hypothetical protein                               |
| 954114  | 1006418 | 52304 | OXZ40890.1 | B9N58_04820 | 995937  | 998516  | -1 hypothetical protein                               |
| 954114  | 1006418 | 52304 | OXZ40891.1 | B9N58_04825 | 998524  | 1000947 | -1 conjugal transfer protein TraE                     |
| 954114  | 1006418 | 52304 |            | B9N58_04830 | 1002140 | 1002496 | -1 hypothetical protein                               |
| 954114  | 1006418 | 52304 | OXZ40837.1 | B9N58_04835 | 1002498 | 1002788 | -1 hypothetical protein                               |
| 954114  | 1006418 | 52304 | OXZ40838.1 | B9N58_04840 | 1002798 | 1003661 | -1 hypothetical protein                               |
| 954114  | 1006418 | 52304 | OXZ40839.1 | B9N58_04845 | 1003672 | 1003887 | -1 conjugal transfer protein                          |
| 954114  | 1006418 | 52304 | OXZ40840.1 | B9N58_04850 | 1003889 | 1004200 | -1 single-stranded DNA-binding protein                |
| 954114  | 1006418 | 52304 |            | B9N58_04855 | 1004396 | 1005864 | -1 hypothetical protein                               |
| 954114  | 1006418 | 52304 | OXZ40841.1 | B9N58_04860 | 1005882 | 1006418 | -1 ClbS/DfsB family four-helix bundle protein         |
| 956655  | 968378  | 11723 |            | B9N58_04635 | 956655  | 956857  | -1 hypothetical protein                               |
| 956655  | 968378  | 11723 |            | B9N58_04640 | 956885  | 957130  | -1 hypothetical protein                               |
| 956655  | 968378  | 11723 |            | B9N58_04645 | 957132  | 957936  | -1 ABC transporter                                    |
| 956655  | 968378  | 11723 |            | B9N58_04650 | 957923  | 958642  | -1 iron ABC transporter permease                      |
| 956655  | 968378  | 11723 | OXZ40901.1 | B9N58_04655 | 958702  | 959460  | -1 SAM-dependent methyltransferase                    |
| 956655  | 968378  | 11723 | OXZ40902.1 | B9N58_04660 | 959555  | 960148  | 1 transcriptional regulator                           |
| 956655  | 968378  | 11723 | OXZ40903.1 | B9N58_04665 | 960299  | 960490  | -1 hypothetical protein                               |
| 956655  | 968378  | 11723 |            | B9N58_04670 | 960685  | 961231  | 1 transposase                                         |
| 956655  | 968378  | 11723 | OXZ40904.1 | B9N58_04675 | 961267  | 962100  | 1 hypothetical protein                                |
| 956655  | 968378  | 11723 | OXZ40905.1 | B9N58_04680 | 962331  | 963533  | -1 ABC transporter substrate-binding protein          |
| 956655  | 968378  | 11723 | OXZ40906.1 | B9N58_04685 | 963533  | 963958  | -1 FMN-binding domain-containing protein              |
| 956655  | 968378  | 11723 | OXZ40907.1 | B9N58_04690 | 963955  | 964674  | -1 GTPase                                             |
| 956655  | 968378  | 11723 | OXZ40908.1 | B9N58_04695 | 964686  | 965834  | -1 ABC transporter permease                           |
| 956655  | 968378  | 11723 | OXZ40909.1 | B9N58_04700 | 965824  | 967107  | -1 ABC transporter permease                           |
| 956655  | 968378  | 11723 | OXZ40910.1 | B9N58_04705 | 967116  | 968378  | -1 hypothetical protein                               |
| 970450  | 979633  | 9183  | OXZ40913.1 | B9N58_04720 | 970450  | 971127  | -1 ABC transporter ATP-binding protein                |
| 970450  | 979633  | 9183  | OXZ40914.1 | B9N58_04725 | 971127  | 971522  | -1 hypothetical protein                               |
| 970450  | 979633  | 9183  | OXZ40915.1 | B9N58_04730 | 971537  | 971719  | -1 ferrous iron transporter B                         |
| 970450  | 979633  | 9183  | OXZ40916.1 | B9N58_04735 | 971967  | 972197  | -1 ferrous iron transport protein A                   |
| 970450  | 979633  | 9183  | OXZ40917.1 | B9N58_04740 | 972495  | 972602  | -1 replication initiator domain protein A             |
| 970450  | 979633  | 9183  | OXZ40875.1 | B9N58_04745 | 973855  | 974205  | -1 hypothetical protein                               |
| 970450  | 979633  | 9183  | OXZ40876.1 | B9N58_04750 | 974230  | 974955  | -1 ABC transporter permease                           |
| 970450  | 979633  | 9183  | OXZ40877.1 | B9N58_04755 | 974939  | 975823  | -1 multidrug ABC transporter ATP-binding protein      |
| 970450  | 979633  | 9183  | OXZ40878.1 | B9N58_04760 | 975801  | 976043  | -1 hypothetical protein                               |
| 970450  | 979633  | 9183  | OXZ40879.1 | B9N58_04765 | 976036  | 976434  | -1 hypothetical protein                               |
| 970450  | 979633  | 9183  | OXZ40880.1 | B9N58_04770 | 976565  | 977170  | -1 DNA-binding response regulator                     |
| 970450  | 979633  | 9183  | OXZ40881.1 | B9N58_04775 | 977142  | 978689  | -1 hypothetical protein                               |
| 970450  | 979633  | 9183  | OXZ40882.1 | B9N58_04780 | 978977  | 979633  | -1 DNA-binding protein                                |
| 1022942 | 1030690 | 7748  | OXZ40859.1 | B9N58_04950 | 1022942 | 1023106 | -1 hypothetical protein                               |
| 1022942 | 1030690 | 7748  | OXZ40860.1 | B9N58_04955 | 1023211 | 1023579 | -1 hypothetical protein                               |
| 1022942 | 1030690 | 7748  | OXZ40874.1 | B9N58_04960 | 1023590 | 1023787 | -1 hypothetical protein                               |
| 1022942 | 1030690 | 7748  | OXZ40861.1 | B9N58_04965 | 1023879 | 1025384 | -1 cardiolipin synthase                               |
| 1022942 | 1030690 | 7748  | OXZ40862.1 | B9N58_04970 | 1025449 | 1026423 | -1 choloylglycine hydrolase                           |
| 1022942 | 1030690 | 7748  | OXZ40863.1 | B9N58_04975 | 1026718 | 1027017 | -1 hypothetical protein                               |
| 1022942 | 1030690 | 7748  | OXZ40864.1 | B9N58_04980 | 1027079 | 1028539 | -1 conjugal transfer protein TraA                     |
| 1022942 | 1030690 | 7748  | OXZ40865.1 | B9N58_04985 | 1028618 | 1028806 | -1 hypothetical protein                               |
| 1022942 | 1030690 | 7748  | OXZ40866.1 | B9N58_04990 | 1028781 | 1029101 | -1 hypothetical protein                               |
| 1022942 | 1030690 | 7748  | OXZ40867.1 | B9N58_04995 | 1029212 | 1030690 | -1 Lsa family ABC-F type ribosomal protection protein |
| 1028781 | 1037345 | 8564  | OXZ40865.1 | B9N58_04985 | 1028618 | 1028806 | -1 hypothetical protein                               |
| 1028781 | 1037345 | 8564  | OXZ40866.1 | B9N58_04990 | 1028781 | 1029101 | -1 hypothetical protein                               |
| 1028781 | 1037345 | 8564  | OXZ40867.1 | B9N58_04995 | 1029212 | 1030690 | -1 Lsa family ABC-F type ribosomal protection protein |
| 1028781 | 1037345 | 8564  | OXZ40868.1 | B9N58_05000 | 1030738 | 1032408 | -1 recombinase                                        |
| 1028781 | 1037345 | 8564  | OXZ40869.1 | B9N58_05005 | 1032451 | 1033029 | -1 conjugal transfer protein TraG                     |
| 1028781 | 1037345 | 8564  | OXZ40870.1 | B9N58_05010 | 1033022 | 1033756 | -1 phage antirepressor Ant                            |
| 1028781 | 1037345 | 8564  | OXZ40871.1 | B9N58_05015 | 1033753 | 1034238 | -1 conjugal transfer protein                          |
| 1028781 | 1037345 | 8564  | OXZ40872.1 | B9N58_05020 | 1034231 | 1035058 | -1 nucleoside triphosphate hydrolase                  |
| 1028781 | 1037345 | 8564  | OXZ40873.1 | B9N58_05025 | 1035055 | 1035828 | -1 replication initiator protein A                    |
| 1028781 | 1037345 | 8564  | OXZ40720.1 | B9N58_05030 | 1037160 | 1037345 | -1 hypothetical protein                               |
| 1033022 | 1037345 | 4323  | OXZ40869.1 | B9N58_05005 | 1032451 | 1033029 | -1 conjugal transfer protein TraG                     |
| 1033022 | 1037345 | 4323  | OXZ40870.1 | B9N58_05010 | 1033022 | 1033756 | -1 phage antirepressor Ant                            |
| 1033022 | 1037345 | 4323  | OXZ40871.1 | B9N58_05015 | 1033753 | 1034238 | -1 conjugal transfer protein                          |
| 1033022 | 1037345 | 4323  | OXZ40872.1 | B9N58_05020 | 1034231 | 1035058 | -1 nucleoside triphosphate hydrolase                  |
| 1033022 | 1037345 | 4323  | OXZ40873.1 | B9N58_05025 | 1035055 | 1035828 | -1 replication initiator protein A                    |
| 1033022 | 1037345 | 4323  | OXZ40720.1 | B9N58_05030 | 1037160 | 1037345 | -1 hypothetical protein                               |
| 1424435 | 1460901 | 36466 | OXZ40485.1 | B9N58_06810 | 1423846 | 1424445 | -1 capsular biosynthesis protein                      |
| 1424435 | 1460901 | 36466 | OXZ40486.1 | B9N58_06815 | 1424435 | 1425073 | -1 capsular biosynthesis protein                      |
| 1424435 | 1460901 | 36466 | OXZ40487.1 | B9N58_06820 | 1425075 | 1425854 | -1 capsular biosynthesis protein                      |
| 1424435 | 1460901 | 36466 | OXZ40488.1 | B9N58_06825 | 1425855 | 1426277 | -1 enterotoxin                                        |
| 1424435 | 1460901 | 36466 | OXZ40489.1 | B9N58_06830 | 1426458 | 1426982 | 1 DNA topology modulation protein FlaR                |
| 1424435 | 1460901 | 36466 | OXZ40490.1 | B9N58_06835 | 1427098 | 1434705 | -1 hypothetical protein                               |
| 1424435 | 1460901 | 36466 | OXZ40491.1 | B9N58_06840 | 1435350 | 1440322 | -1 hypothetical protein                               |
| 1424435 | 1460901 | 36466 | OXZ40350.1 | B9N58_06845 | 1441323 | 1444408 | -1 hypothetical protein                               |
| 1424435 | 1460901 | 36466 | OXZ40351.1 | B9N58_06850 | 1444520 | 1449238 | -1 hypothetical protein                               |
| 1424435 | 1460901 | 36466 | OXZ40352.1 | B9N58_06855 | 1450091 | 1450546 | -1 IS200/IS605 family transposase                     |
| 1424435 | 1460901 | 36466 | OXZ40353.1 | B9N58_06860 | 1450748 | 1452637 | -1 cell wall protein                                  |

|         |         |       |            |             |         |         |                                                        |
|---------|---------|-------|------------|-------------|---------|---------|--------------------------------------------------------|
| 1424435 | 1460901 | 36466 | OXZ40354.1 | B9N58_06865 | 1453409 | 1453840 | -1 GNAT family N-acetyltransferase                     |
| 1424435 | 1460901 | 36466 | OXZ40355.1 | B9N58_06870 | 1453866 | 1454564 | -1 hypothetical protein                                |
| 1424435 | 1460901 | 36466 | OXZ40356.1 | B9N58_06875 | 1454564 | 1455283 | -1 peptidase S51                                       |
| 1424435 | 1460901 | 36466 | OXZ40357.1 | B9N58_06880 | 1456188 | 1459541 | -1 ABC transporter permease                            |
| 1424435 | 1460901 | 36466 | OXZ40358.1 | B9N58_06885 | 1459543 | 1460244 | -1 macrolide ABC transporter ATP-binding protein       |
| 1424435 | 1460901 | 36466 | OXZ40359.1 | B9N58_06890 | 1460356 | 1460901 | 1 TetR family transcriptional regulator                |
| 1435350 | 1440322 | 4972  | OXZ40491.1 | B9N58_06840 | 1435350 | 1440322 | -1 hypothetical protein                                |
| 1494017 | 1575399 | 81382 | OXZ40386.1 | B9N58_07025 | 1494017 | 1494325 | -1 exosortase                                          |
| 1494017 | 1575399 | 81382 | OXZ40387.1 | B9N58_07030 | 1494330 | 1495001 | -1 ATPase                                              |
| 1494017 | 1575399 | 81382 | OXZ40388.1 | B9N58_07035 | 1495202 | 1496740 | -1 hypothetical protein                                |
| 1494017 | 1575399 | 81382 | OXZ40389.1 | B9N58_07040 | 1496916 | 1498424 | -1 AAA family ATPase                                   |
| 1494017 | 1575399 | 81382 | OXZ40390.1 | B9N58_07045 | 1499168 | 1500058 | -1 methionine sulfoxide reductase                      |
| 1494017 | 1575399 | 81382 | OXZ40391.1 | B9N58_07050 | 1500214 | 1500705 | -1 protein-S-isoprenylcysteine methyltransferase       |
| 1494017 | 1575399 | 81382 | OXZ40392.1 | B9N58_07055 | 1500719 | 1501657 | -1 esterase                                            |
| 1494017 | 1575399 | 81382 | OXZ40393.1 | B9N58_07060 | 1501726 | 1502352 | -1 hypothetical protein                                |
| 1494017 | 1575399 | 81382 | OXZ40394.1 | B9N58_07065 | 1502380 | 1502988 | -1 SAM-dependent methyltransferase                     |
| 1494017 | 1575399 | 81382 | OXZ40395.1 | B9N58_07070 | 1503208 | 1504962 | -1 hypothetical protein                                |
| 1494017 | 1575399 | 81382 | OXZ40396.1 | B9N58_07075 | 1505329 | 1505835 | -1 hypothetical protein                                |
| 1494017 | 1575399 | 81382 | OXZ40397.1 | B9N58_07080 | 1505846 | 1506592 | -1 alpha/beta hydrolase                                |
| 1494017 | 1575399 | 81382 | OXZ40398.1 | B9N58_07085 | 1506627 | 1507460 | -1 SAM-dependent methyltransferase                     |
| 1494017 | 1575399 | 81382 | OXZ40399.1 | B9N58_07090 | 1507482 | 1508108 | -1 hypothetical protein                                |
| 1494017 | 1575399 | 81382 | OXZ40400.1 | B9N58_07095 | 1508325 | 1509689 | -1 ABC transporter ATP-binding protein                 |
| 1494017 | 1575399 | 81382 | OXZ40401.1 | B9N58_07100 | 1509683 | 1510372 | -1 cobalt ABC transporter permease                     |
| 1494017 | 1575399 | 81382 | OXZ40402.1 | B9N58_07105 | 1510372 | 1510956 | -1 hypothetical protein                                |
| 1494017 | 1575399 | 81382 | OXZ40480.1 | B9N58_07110 | 1511016 | 1512359 | -1 MATE family efflux transporter                      |
| 1494017 | 1575399 | 81382 | OXZ40403.1 | B9N58_07115 | 1512371 | 1514092 | -1 ABC transporter ATP-binding protein                 |
| 1494017 | 1575399 | 81382 | OXZ40404.1 | B9N58_07120 | 1514076 | 1515830 | -1 ABC transporter ATP-binding protein                 |
| 1494017 | 1575399 | 81382 | OXZ40405.1 | B9N58_07125 | 1515991 | 1516983 | 1 AraC family transcriptional regulator                |
| 1494017 | 1575399 | 81382 |            | B9N58_07130 | 1517161 | 1517348 | 1 cell filamentation protein                           |
| 1494017 | 1575399 | 81382 | OXZ40406.1 | B9N58_07135 | 1517574 | 1518278 | -1 hypothetical protein                                |
| 1494017 | 1575399 | 81382 | OXZ40407.1 | B9N58_07140 | 1518287 | 1519039 | -1 hypothetical protein                                |
| 1494017 | 1575399 | 81382 | OXZ40408.1 | B9N58_07145 | 1519041 | 1519934 | -1 ABC transporter ATP-binding protein                 |
| 1494017 | 1575399 | 81382 | OXZ40409.1 | B9N58_07150 | 1520063 | 1520758 | 1 DNA-binding response regulator                       |
| 1494017 | 1575399 | 81382 | OXZ40410.1 | B9N58_07155 | 1520760 | 1522055 | 1 two-component sensor histidine kinase                |
| 1494017 | 1575399 | 81382 |            | B9N58_07160 | 1522098 | 1522384 | -1 hypothetical protein                                |
| 1494017 | 1575399 | 81382 |            | B9N58_07165 | 1522760 | 1523472 | -1 hypothetical protein                                |
| 1494017 | 1575399 | 81382 | OXZ40411.1 | B9N58_07170 | 1523525 | 1525261 | -1 multidrug ABC transporter ATP-binding protein       |
| 1494017 | 1575399 | 81382 | OXZ40412.1 | B9N58_07175 | 1525254 | 1526975 | -1 ABC transporter ATP-binding protein                 |
| 1494017 | 1575399 | 81382 | OXZ40413.1 | B9N58_07180 | 1526987 | 1528438 | -1 ABC transporter                                     |
| 1494017 | 1575399 | 81382 | OXZ40414.1 | B9N58_07185 | 1528440 | 1529111 | -1 cobalt transporter                                  |
| 1494017 | 1575399 | 81382 | OXZ40415.1 | B9N58_07190 | 1529108 | 1529698 | -1 hypothetical protein                                |
| 1494017 | 1575399 | 81382 | OXZ40416.1 | B9N58_07195 | 1529765 | 1530742 | -1 AraC family transcriptional regulator               |
| 1494017 | 1575399 | 81382 | OXZ40417.1 | B9N58_07200 | 1530752 | 1531336 | -1 TetR family transcriptional regulator               |
| 1494017 | 1575399 | 81382 |            | B9N58_07205 | 1531537 | 1531919 | -1 AraC family transcriptional regulator               |
| 1494017 | 1575399 | 81382 | OXZ40418.1 | B9N58_07210 | 1532893 | 1533549 | -1 hypothetical protein                                |
| 1494017 | 1575399 | 81382 | OXZ40419.1 | B9N58_07215 | 1533798 | 1534394 | -1 hypothetical protein                                |
| 1494017 | 1575399 | 81382 | OXZ40420.1 | B9N58_07220 | 1534396 | 1534854 | -1 hypothetical protein                                |
| 1494017 | 1575399 | 81382 | OXZ40421.1 | B9N58_07225 | 1535164 | 1536900 | -1 multidrug ABC transporter ATP-binding protein       |
| 1494017 | 1575399 | 81382 | OXZ40422.1 | B9N58_07230 | 1536893 | 1538611 | -1 ABC transporter ATP-binding protein                 |
| 1494017 | 1575399 | 81382 | OXZ40423.1 | B9N58_07235 | 1538616 | 1539212 | -1 TetR family transcriptional regulator               |
| 1494017 | 1575399 | 81382 | OXZ40424.1 | B9N58_07240 | 1539506 | 1539811 | 1 plasmid mobilization relaxosome protein MobC         |
| 1494017 | 1575399 | 81382 |            | B9N58_07245 | 1539864 | 1540352 | 1 relaxase                                             |
| 1494017 | 1575399 | 81382 | OXZ40425.1 | B9N58_07250 | 1540435 | 1542969 | -1 DEAD/DEAH box helicase                              |
| 1494017 | 1575399 | 81382 | OXZ40426.1 | B9N58_07255 | 1542972 | 1543805 | -1 hypothetical protein                                |
| 1494017 | 1575399 | 81382 | OXZ40427.1 | B9N58_07260 | 1543842 | 1544003 | -1 transcriptional regulator                           |
| 1494017 | 1575399 | 81382 |            | B9N58_07265 | 1544226 | 1544567 | -1 hypothetical protein                                |
| 1494017 | 1575399 | 81382 | OXZ40428.1 | B9N58_07270 | 1544618 | 1544866 | -1 hypothetical protein                                |
| 1494017 | 1575399 | 81382 | OXZ40429.1 | B9N58_07275 | 1544863 | 1545450 | -1 transcriptional regulator                           |
| 1494017 | 1575399 | 81382 | OXZ40430.1 | B9N58_07280 | 1545949 | 1547625 | -1 recombinase family protein                          |
| 1494017 | 1575399 | 81382 | OXZ40431.1 | B9N58_07285 | 1548719 | 1549651 | -1 AraC family transcriptional regulator               |
| 1494017 | 1575399 | 81382 | OXZ40432.1 | B9N58_07290 | 1549648 | 1551039 | -1 ABC transporter ATP-binding protein                 |
| 1494017 | 1575399 | 81382 | OXZ40433.1 | B9N58_07295 | 1551033 | 1551728 | -1 ABC transporter permease                            |
| 1494017 | 1575399 | 81382 |            | B9N58_07300 | 1551728 | 1552309 | -1 hypothetical protein                                |
| 1494017 | 1575399 | 81382 | OXZ40434.1 | B9N58_07305 | 1552320 | 1554041 | -1 ABC transporter ATP-binding protein                 |
| 1494017 | 1575399 | 81382 | OXZ40435.1 | B9N58_07310 | 1554038 | 1555786 | -1 ABC transporter ATP-binding protein                 |
| 1494017 | 1575399 | 81382 | OXZ40436.1 | B9N58_07315 | 1556431 | 1556901 | -1 replication protein                                 |
| 1494017 | 1575399 | 81382 | OXZ40437.1 | B9N58_07320 | 1556986 | 1557597 | -1 SAM-dependent methyltransferase                     |
| 1494017 | 1575399 | 81382 | OXZ40438.1 | B9N58_07325 | 1557801 | 1558328 | -1 conjugal transfer protein                           |
| 1494017 | 1575399 | 81382 | OXZ40439.1 | B9N58_07330 | 1558760 | 1560394 | -1 MobA/MobL protein                                   |
| 1494017 | 1575399 | 81382 | OXZ40440.1 | B9N58_07335 | 1560740 | 1561030 | -1 hypothetical protein                                |
| 1494017 | 1575399 | 81382 | OXZ40441.1 | B9N58_07340 | 1561269 | 1561748 | 1 AraC family transcriptional regulator                |
| 1494017 | 1575399 | 81382 | OXZ40442.1 | B9N58_07345 | 1562009 | 1562503 | -1 hypothetical protein                                |
| 1494017 | 1575399 | 81382 | OXZ40443.1 | B9N58_07350 | 1562933 | 1563151 | -1 transcriptional regulator                           |
| 1494017 | 1575399 | 81382 | OXZ40444.1 | B9N58_07355 | 1563269 | 1563427 | -1 hypothetical protein                                |
| 1494017 | 1575399 | 81382 | OXZ40445.1 | B9N58_07360 | 1563429 | 1563740 | -1 single-stranded DNA-binding protein                 |
| 1494017 | 1575399 | 81382 | OXZ40446.1 | B9N58_07365 | 1563943 | 1564251 | -1 hypothetical protein                                |
| 1494017 | 1575399 | 81382 | OXZ40447.1 | B9N58_07370 | 1564280 | 1564468 | -1 hypothetical protein                                |
| 1494017 | 1575399 | 81382 | OXZ40448.1 | B9N58_07375 | 1564741 | 1566234 | -1 23S rRNA (uracil(1939)-C(5))-methyltransferase RlmD |



|         |         |                  |             |         |         |                                                      |
|---------|---------|------------------|-------------|---------|---------|------------------------------------------------------|
| 1494017 | 1575399 | 81382 OXZ40449.1 | B9N58_07380 | 1566327 | 1568123 | -1 ABC transporter                                   |
| 1494017 | 1575399 | 81382 OXZ40450.1 | B9N58_07385 | 1568116 | 1569876 | -1 multidrug ABC transporter ATP-binding protein     |
| 1494017 | 1575399 | 81382 OXZ40451.1 | B9N58_07390 | 1569851 | 1570327 | -1 MarR family transcriptional regulator             |
| 1494017 | 1575399 | 81382 OXZ40452.1 | B9N58_07395 | 1570494 | 1571795 | -1 phosphomethylpyrimidine synthase                  |
| 1494017 | 1575399 | 81382 OXZ40453.1 | B9N58_07400 | 1571976 | 1572890 | -1 cyclic pyranopterin monophosphate synthase MoaC   |
| 1494017 | 1575399 | 81382 OXZ40454.1 | B9N58_07405 | 1572892 | 1573839 | -1 GTP 3',8-cyclase MoaA                             |
| 1494017 | 1575399 | 81382 OXZ40455.1 | B9N58_07410 | 1573927 | 1575102 | -1 hypothetical protein                              |
| 1494017 | 1575399 | 81382 OXZ40456.1 | B9N58_07415 | 1575118 | 1575399 | -1 hypothetical protein                              |
| 1520063 | 1530742 | 10679 OXZ40409.1 | B9N58_07150 | 1520063 | 1520758 | 1 DNA-binding response regulator                     |
| 1520063 | 1530742 | 10679 OXZ40410.1 | B9N58_07155 | 1520760 | 1522055 | 1 two-component sensor histidine kinase              |
| 1520063 | 1530742 | 10679            | B9N58_07160 | 1522098 | 1522384 | -1 hypothetical protein                              |
| 1520063 | 1530742 | 10679            | B9N58_07165 | 1522760 | 1523472 | -1 hypothetical protein                              |
| 1520063 | 1530742 | 10679 OXZ40411.1 | B9N58_07170 | 1523525 | 1525261 | -1 multidrug ABC transporter ATP-binding protein     |
| 1520063 | 1530742 | 10679 OXZ40412.1 | B9N58_07175 | 1525254 | 1526975 | -1 ABC transporter ATP-binding protein               |
| 1520063 | 1530742 | 10679 OXZ40413.1 | B9N58_07180 | 1526987 | 1528438 | -1 ABC transporter                                   |
| 1520063 | 1530742 | 10679 OXZ40414.1 | B9N58_07185 | 1528440 | 1529111 | -1 cobalt transporter                                |
| 1520063 | 1530742 | 10679 OXZ40415.1 | B9N58_07190 | 1529108 | 1529698 | -1 hypothetical protein                              |
| 1520063 | 1530742 | 10679 OXZ40416.1 | B9N58_07195 | 1529765 | 1530742 | -1 AraC family transcriptional regulator             |
| 1556431 | 1561748 | 5317 OXZ40436.1  | B9N58_07315 | 1556431 | 1556901 | -1 replication protein                               |
| 1556431 | 1561748 | 5317 OXZ40437.1  | B9N58_07320 | 1556986 | 1557597 | -1 SAM-dependent methyltransferase                   |
| 1556431 | 1561748 | 5317 OXZ40438.1  | B9N58_07325 | 1557801 | 1558328 | -1 conjugal transfer protein                         |
| 1556431 | 1561748 | 5317 OXZ40439.1  | B9N58_07330 | 1558760 | 1560394 | -1 MobA/MobL protein                                 |
| 1556431 | 1561748 | 5317 OXZ40440.1  | B9N58_07335 | 1560740 | 1561030 | -1 hypothetical protein                              |
| 1556431 | 1561748 | 5317 OXZ40441.1  | B9N58_07340 | 1561269 | 1561748 | 1 AraC family transcriptional regulator              |
| 1717729 | 1724002 | 6273 OXZ39742.1  | B9N58_08075 | 1716944 | 1717747 | -1 ABC transporter ATP-binding protein               |
| 1717729 | 1724002 | 6273 OXZ39743.1  | B9N58_08080 | 1717729 | 1717866 | -1 nitrate ABC transporter substrate-binding protein |
| 1717729 | 1724002 | 6273 OXZ39744.1  | B9N58_08085 | 1717906 | 1718529 | -1 ABC transporter permease                          |
| 1717729 | 1724002 | 6273 OXZ39745.1  | B9N58_08090 | 1718490 | 1718999 | -1 hypothetical protein                              |
| 1717729 | 1724002 | 6273 OXZ39746.1  | B9N58_08095 | 1719051 | 1719266 | -1 hypothetical protein                              |
| 1717729 | 1724002 | 6273 OXZ39747.1  | B9N58_08100 | 1719259 | 1719450 | -1 hypothetical protein                              |
| 1717729 | 1724002 | 6273             | B9N58_08105 | 1719930 | 1720375 | 1 hypothetical protein                               |
| 1717729 | 1724002 | 6273             | B9N58_08110 | 1720544 | 1720825 | -1 type I restriction endonuclease                   |
| 1717729 | 1724002 | 6273 OXZ39748.1  | B9N58_08115 | 1720890 | 1721873 | -1 hypothetical protein                              |
| 1717729 | 1724002 | 6273 OXZ39749.1  | B9N58_08120 | 1721866 | 1722477 | -1 hypothetical protein                              |
| 1717729 | 1724002 | 6273 OXZ39750.1  | B9N58_08125 | 1722803 | 1724002 | -1 sugar ABC transporter ATP-binding protein         |

**Table S3B: Predicted genomic islands in the genome of *F. magna* 08T492**

Shown are genes of genomic islands predicted by IslandViewer4

| Island start | Island end | Length | Gene name  | Locus       | Gene start | Gene end | Strand | Product                                         |
|--------------|------------|--------|------------|-------------|------------|----------|--------|-------------------------------------------------|
| 4466         | 13082      | 8616   | OXZ39870.1 | B9N56_00035 | 4466       | 5335     | 1      | hypothetical protein                            |
| 4466         | 13082      | 8616   | OXZ39871.1 | B9N56_00040 | 5322       | 7310     | 1      | exopolyphosphatase                              |
| 4466         | 13082      | 8616   | OXZ39872.1 | B9N56_00045 | 7291       | 7737     | 1      | 50S ribosomal protein L9                        |
| 4466         | 13082      | 8616   | OXZ39873.1 | B9N56_00050 | 7771       | 9108     | 1      | replicative DNA helicase                        |
| 4466         | 13082      | 8616   | OXZ39874.1 | B9N56_00055 | 9105       | 9668     | 1      | GNAT family N-acetyltransferase                 |
| 4466         | 13082      | 8616   | OXZ39875.1 | B9N56_00060 | 9673       | 10431    | 1      | DNA replication protein                         |
| 4466         | 13082      | 8616   | OXZ39876.1 | B9N56_00065 | 10434      | 11411    | 1      | DNA replication protein DnaC                    |
| 4466         | 13082      | 8616   | OXZ39877.1 | B9N56_00070 | 11408      | 12052    | 1      | NAD(P)H-hydrate epimerase                       |
| 4466         | 13082      | 8616   | OXZ39878.1 | B9N56_00075 | 12540      | 13082    | 1      | ECF transporter S component                     |
| 4466         | 13082      | 8616   | OXZ39879.1 | B9N56_00080 | 13066      | 13752    | 1      | radical SAM protein                             |
| 89839        | 96411      | 6572   | OXZ39971.1 | B9N56_00550 | 89839      | 91074    | 1      | peptidoglycan-binding protein                   |
| 89839        | 96411      | 6572   | OXZ39695.1 | B9N56_00615 | 95728      | 96003    | -1     | hypothetical protein                            |
| 89839        | 96411      | 6572   |            | B9N56_00620 | 96091      | 96411    | -1     | hypothetical protein                            |
| 117178       | 124321     | 7143   | OXZ39693.1 | B9N56_00665 | 117178     | 117819   | -1     | hemolysin III                                   |
| 117178       | 124321     | 7143   | OXZ39697.1 | B9N56_00670 | 117972     | 118475   | 1      | acetyltransferase                               |
| 117178       | 124321     | 7143   | OXZ39694.1 | B9N56_00675 | 118475     | 119209   | 1      | hydrolase                                       |
| 117178       | 124321     | 7143   | OXZ39623.1 | B9N56_00680 | 121747     | 122322   | 1      | cell filamentation protein Fic                  |
| 117178       | 124321     | 7143   | OXZ39624.1 | B9N56_00685 | 123705     | 124082   | -1     | death-on-curing protein                         |
| 117178       | 124321     | 7143   | OXZ39625.1 | B9N56_00690 | 124079     | 124321   | -1     | prevent-host-death protein                      |
| 675820       | 682312     | 6492   | OXZ38460.1 | B9N56_03450 | 675820     | 676518   | 1      | DNA-binding response regulator                  |
| 675820       | 682312     | 6492   | OXZ38461.1 | B9N56_03455 | 676559     | 677143   | 1      | peptidylprolyl isomerase                        |
| 675820       | 682312     | 6492   | OXZ38462.1 | B9N56_03460 | 677145     | 677777   | 1      | thymidine kinase                                |
| 675820       | 682312     | 6492   | OXZ38463.1 | B9N56_03465 | 677799     | 678269   | -1     | S-ribosylhomocysteine lyase                     |
| 675820       | 682312     | 6492   | OXZ38464.1 | B9N56_03470 | 678278     | 679381   | -1     | rod shape-determining protein RodA              |
| 675820       | 682312     | 6492   | OXZ38465.1 | B9N56_03475 | 679456     | 680289   | 1      | endonuclease                                    |
| 675820       | 682312     | 6492   | OXZ38466.1 | B9N56_03480 | 680270     | 680896   | 1      | endonuclease III                                |
| 675820       | 682312     | 6492   | OXZ38467.1 | B9N56_03485 | 680964     | 681884   | 1      | aspartate carbamoyltransferase                  |
| 675820       | 682312     | 6492   | OXZ38468.1 | B9N56_03490 | 681884     | 682312   | 1      | subunit                                         |
| 698698       | 704829     | 6131   | OXZ38485.1 | B9N56_03575 | 698698     | 700386   | 1      | hypothetical protein                            |
| 698698       | 704829     | 6131   | OXZ38486.1 | B9N56_03580 | 700397     | 701194   | 1      | pyruvate, phosphate dikinase regulatory protein |
| 698698       | 704829     | 6131   | OXZ38487.1 | B9N56_03585 | 701278     | 702711   | 1      | serine/threonine protein kinase                 |
| 698698       | 704829     | 6131   | OXZ38488.1 | B9N56_03590 | 702713     | 703387   | 1      | protein phosphatase                             |
| 698698       | 704829     | 6131   | OXZ38489.1 | B9N56_03595 | 703444     | 704829   | 1      | methylthiotransferase MiaB                      |
| 737859       | 742292     | 4433   | OXZ38521.1 | B9N56_03760 | 737859     | 738194   | -1     | histidine triad nucleotide-binding protein      |
| 737859       | 742292     | 4433   | OXZ38522.1 | B9N56_03765 | 738241     | 739533   | -1     | C(2)-methylthiotransferase MtaB                 |
| 737859       | 742292     | 4433   | OXZ38523.1 | B9N56_03770 | 739533     | 740258   | -1     | rRNA methyltransferase                          |
| 737859       | 742292     | 4433   | OXZ38524.1 | B9N56_03775 | 740251     | 741174   | -1     | 50S ribosomal protein L11 methyltransferase     |
| 737859       | 742292     | 4433   | OXZ38525.1 | B9N56_03780 | 741174     | 742292   | -1     | molecular chaperone DnaJ                        |
| 892629       | 969377     | 76748  | OXZ38269.1 | B9N56_04475 | 892629     | 893906   | -1     | ABC transporter permease                        |
| 892629       | 969377     | 76748  | OXZ38270.1 | B9N56_04480 | 894104     | 894391   | -1     | cupin                                           |
| 892629       | 969377     | 76748  | OXZ38271.1 | B9N56_04485 | 894459     | 895031   | -1     | uracil-DNA glycosylase                          |
| 892629       | 969377     | 76748  |            | B9N56_04490 | 895170     | 895373   | -1     | hypothetical protein                            |
| 892629       | 969377     | 76748  |            | B9N56_04495 | 895401     | 895646   | -1     | hypothetical protein                            |
| 892629       | 969377     | 76748  | OXZ38277.1 | B9N56_04500 | 895648     | 896451   | -1     | ABC transporter                                 |
| 892629       | 969377     | 76748  |            | B9N56_04505 | 896438     | 897157   | -1     | iron ABC transporter permease                   |
| 892629       | 969377     | 76748  | OXZ38272.1 | B9N56_04510 | 897217     | 897975   | -1     | SAM-dependent methyltransferase                 |
| 892629       | 969377     | 76748  | OXZ38273.1 | B9N56_04515 | 898070     | 898663   | 1      | transcriptional regulator                       |
| 892629       | 969377     | 76748  | OXZ38274.1 | B9N56_04520 | 899200     | 899384   | 1      | transposase                                     |
| 892629       | 969377     | 76748  | OXZ38150.1 | B9N56_04525 | 900561     | 900788   | 1      | transposase                                     |
| 892629       | 969377     | 76748  | OXZ38148.1 | B9N56_04530 | 900860     | 901066   | 1      | hypothetical protein                            |
| 892629       | 969377     | 76748  | OXZ38149.1 | B9N56_04535 | 901178     | 901694   | 1      | IS3 family transposase                          |
| 892629       | 969377     | 76748  | OXZ38116.1 | B9N56_04540 | 902695     | 902868   | 1      | transposase                                     |
| 892629       | 969377     | 76748  | OXZ38117.1 | B9N56_04545 | 903099     | 904301   | -1     | ABC transporter substrate-binding protein       |
| 892629       | 969377     | 76748  | OXZ38118.1 | B9N56_04550 | 904301     | 904726   | -1     | FMN-binding domain-containing protein           |
| 892629       | 969377     | 76748  | OXZ38119.1 | B9N56_04555 | 904723     | 905442   | -1     | GTPase                                          |
| 892629       | 969377     | 76748  | OXZ38120.1 | B9N56_04560 | 905454     | 906602   | -1     | ABC transporter permease                        |
| 892629       | 969377     | 76748  | OXZ38121.1 | B9N56_04565 | 906592     | 907875   | -1     | ABC transporter permease                        |
| 892629       | 969377     | 76748  | OXZ38122.1 | B9N56_04570 | 907884     | 909146   | -1     | hypothetical protein                            |
| 892629       | 969377     | 76748  | OXZ38123.1 | B9N56_04575 | 909203     | 909868   | -1     | hypothetical protein                            |
| 892629       | 969377     | 76748  | OXZ38124.1 | B9N56_04580 | 909878     | 911215   | -1     | iron transporter                                |
| 892629       | 969377     | 76748  | OXZ38125.1 | B9N56_04585 | 911218     | 911895   | -1     | ABC transporter ATP-binding protein             |
| 892629       | 969377     | 76748  | OXZ38126.1 | B9N56_04590 | 911895     | 912290   | -1     | hypothetical protein                            |
| 892629       | 969377     | 76748  |            | B9N56_04595 | 912333     | 912488   | -1     | hypothetical protein                            |
| 892629       | 969377     | 76748  | OXZ38127.1 | B9N56_04600 | 912490     | 912732   | -1     | FeoA family protein                             |
| 892629       | 969377     | 76748  | OXZ38128.1 | B9N56_04605 | 912736     | 912966   | -1     | ferrous iron transport protein A                |
| 892629       | 969377     | 76748  | OXZ38129.1 | B9N56_04610 | 913264     | 913371   | -1     | replication initiator domain protein A          |
| 892629       | 969377     | 76748  | OXZ38130.1 | B9N56_04615 | 913454     | 913726   | -1     | hypothetical protein                            |
| 892629       | 969377     | 76748  | OXZ38131.1 | B9N56_04620 | 913799     | 914245   | -1     | methionine--tRNA ligase subunit beta            |
| 892629       | 969377     | 76748  | OXZ38132.1 | B9N56_04625 | 914402     | 915637   | -1     | site-specific integrase                         |
| 892629       | 969377     | 76748  | OXZ38133.1 | B9N56_04630 | 915715     | 915924   | -1     | excisionase                                     |
| 892629       | 969377     | 76748  |            | B9N56_04635 | 916360     | 916769   | -1     | RNA polymerase subunit sigma                    |
| 892629       | 969377     | 76748  | OXZ38134.1 | B9N56_04640 | 916727     | 916840   | -1     | RNA polymerase subunit sigma-70                 |

|        |        |                  |             |        |        |                                                   |
|--------|--------|------------------|-------------|--------|--------|---------------------------------------------------|
| 892629 | 969377 | 76748 OXZ38135.1 | B9N56_04645 | 917089 | 918438 | -1 MATE family efflux transporter                 |
| 892629 | 969377 | 76748 OXZ38136.1 | B9N56_04650 | 918475 | 920208 | -1 multidrug ABC transporter ATP-binding protein  |
| 892629 | 969377 | 76748 OXZ38137.1 | B9N56_04655 | 920205 | 921947 | -1 ABC transporter ATP-binding protein            |
| 892629 | 969377 | 76748 OXZ38138.1 | B9N56_04660 | 921983 | 923374 | -1 ABC transporter ATP-binding protein            |
| 892629 | 969377 | 76748 OXZ38139.1 | B9N56_04665 | 923367 | 924068 | -1 cobalt ABC transporter permease                |
| 892629 | 969377 | 76748 OXZ38140.1 | B9N56_04670 | 924093 | 924674 | -1 hypothetical protein                           |
| 892629 | 969377 | 76748 OXZ38141.1 | B9N56_04675 | 924692 | 925303 | -1 TetR family transcriptional regulator          |
| 892629 | 969377 | 76748 OXZ38142.1 | B9N56_04680 | 925615 | 925971 | 1 plasmid mobilization relaxosome protein MobC    |
| 892629 | 969377 | 76748 OXZ38143.1 | B9N56_04685 | 925973 | 927304 | 1 endonuclease                                    |
| 892629 | 969377 | 76748            | B9N56_04690 | 927390 | 928475 | 1 IS256 family transposase                        |
| 892629 | 969377 | 76748 OXZ38144.1 | B9N56_04695 | 928580 | 930070 | -1 hypothetical protein                           |
| 892629 | 969377 | 76748 OXZ38145.1 | B9N56_04700 | 930073 | 930783 | -1 hypothetical protein                           |
| 892629 | 969377 | 76748 OXZ38146.1 | B9N56_04705 | 930784 | 931362 | -1 hypothetical protein                           |
| 892629 | 969377 | 76748 OXZ38147.1 | B9N56_04710 | 931377 | 933107 | -1 hypothetical protein                           |
| 892629 | 969377 | 76748            | B9N56_04715 | 934372 | 936342 | -1 DNA helicase                                   |
| 892629 | 969377 | 76748 OXZ37671.1 | B9N56_04720 | 936329 | 937294 | -1 DNA (cytosine-5-)-methyltransferase            |
| 892629 | 969377 | 76748 OXZ37672.1 | B9N56_04725 | 937287 | 939008 | -1 DNA topoisomerase III                          |
| 892629 | 969377 | 76748 OXZ37673.1 | B9N56_04730 | 939097 | 940080 | -1 hypothetical protein                           |
| 892629 | 969377 | 76748 OXZ37674.1 | B9N56_04735 | 940073 | 940684 | -1 hypothetical protein                           |
| 892629 | 969377 | 76748 OXZ37675.1 | B9N56_04740 | 940758 | 941630 | -1 bacteriocin                                    |
| 892629 | 969377 | 76748 OXZ37676.1 | B9N56_04745 | 941645 | 943228 | -1 copper amine oxidase                           |
| 892629 | 969377 | 76748 OXZ37677.1 | B9N56_04750 | 943215 | 943454 | -1 hypothetical protein                           |
| 892629 | 969377 | 76748 OXZ37678.1 | B9N56_04755 | 943469 | 946048 | -1 hypothetical protein                           |
| 892629 | 969377 | 76748 OXZ37679.1 | B9N56_04760 | 946056 | 948479 | -1 conjugal transfer protein TraE                 |
| 892629 | 969377 | 76748 OXZ37680.1 | B9N56_04765 | 948370 | 948780 | -1 PrgI family protein                            |
| 892629 | 969377 | 76748 OXZ37681.1 | B9N56_04770 | 948782 | 949072 | -1 hypothetical protein                           |
| 892629 | 969377 | 76748 OXZ37682.1 | B9N56_04775 | 949082 | 949945 | -1 hypothetical protein                           |
| 892629 | 969377 | 76748            | B9N56_04780 | 949956 | 950039 | -1 hypothetical protein                           |
| 892629 | 969377 | 76748 OXZ37683.1 | B9N56_04785 | 950043 | 951689 | -1 recombinase RecB                               |
| 892629 | 969377 | 76748 OXZ37684.1 | B9N56_04790 | 951693 | 951917 | -1 hypothetical protein                           |
| 892629 | 969377 | 76748 OXZ37685.1 | B9N56_04795 | 952071 | 952772 | -1 replisome organizer                            |
| 892629 | 969377 | 76748 OXZ37686.1 | B9N56_04800 | 952860 | 953855 | -1 DNA-binding protein                            |
| 892629 | 969377 | 76748 OXZ37687.1 | B9N56_04805 | 953989 | 954186 | -1 hypothetical protein                           |
| 892629 | 969377 | 76748 OXZ37640.1 | B9N56_04810 | 955228 | 955558 | -1 nickase                                        |
| 892629 | 969377 | 76748 OXZ37641.1 | B9N56_04815 | 955872 | 956186 | -1 hypothetical protein                           |
| 892629 | 969377 | 76748            | B9N56_04820 | 956305 | 956403 | -1 hypothetical protein                           |
| 892629 | 969377 | 76748 OXZ37642.1 | B9N56_04825 | 956449 | 957852 | -1 ABC transporter                                |
| 892629 | 969377 | 76748 OXZ37643.1 | B9N56_04830 | 957857 | 958549 | -1 hypothetical protein                           |
| 892629 | 969377 | 76748 OXZ37644.1 | B9N56_04835 | 958530 | 959117 | -1 hypothetical protein                           |
| 892629 | 969377 | 76748 OXZ37645.1 | B9N56_04840 | 959141 | 960874 | -1 ABC transporter ATP-binding protein            |
| 892629 | 969377 | 76748 OXZ37646.1 | B9N56_04845 | 960862 | 962601 | -1 ABC transporter ATP-binding protein            |
| 892629 | 969377 | 76748 OXZ37647.1 | B9N56_04850 | 962906 | 963277 | -1 transcriptional regulator                      |
| 892629 | 969377 | 76748            | B9N56_04855 | 963398 | 963598 | -1 hypothetical protein                           |
| 892629 | 969377 | 76748 OXZ37648.1 | B9N56_04860 | 963602 | 963820 | -1 transcriptional regulator                      |
| 892629 | 969377 | 76748 OXZ37649.1 | B9N56_04865 | 964132 | 965991 | -1 group II intron reverse transcriptase/maturase |
| 892629 | 969377 | 76748 OXZ37650.1 | B9N56_04870 | 966714 | 966845 | -1 hypothetical protein                           |
| 892629 | 969377 | 76748 OXZ37651.1 | B9N56_04875 | 966847 | 967158 | -1 single-stranded DNA-binding protein            |
| 892629 | 969377 | 76748 OXZ37652.1 | B9N56_04880 | 967354 | 968823 | -1 hypothetical protein                           |
| 892629 | 969377 | 76748 OXZ37653.1 | B9N56_04885 | 968841 | 969377 | -1 CibS/DfsB family four-helix bundle protein     |
| 895170 | 899384 | 4214             | B9N56_04490 | 895170 | 895373 | -1 hypothetical protein                           |
| 895170 | 899384 | 4214             | B9N56_04495 | 895401 | 895646 | -1 hypothetical protein                           |
| 895170 | 899384 | 4214 OXZ38277.1  | B9N56_04500 | 895648 | 896451 | -1 ABC transporter                                |
| 895170 | 899384 | 4214             | B9N56_04505 | 896438 | 897157 | -1 iron ABC transporter permease                  |
| 895170 | 899384 | 4214 OXZ38272.1  | B9N56_04510 | 897217 | 897975 | -1 SAM-dependent methyltransferase                |
| 895170 | 899384 | 4214 OXZ38273.1  | B9N56_04515 | 898070 | 898663 | 1 transcriptional regulator                       |
| 895170 | 899384 | 4214 OXZ38274.1  | B9N56_04520 | 899200 | 899384 | 1 transposase                                     |
| 902695 | 909146 | 6451 OXZ38116.1  | B9N56_04540 | 902695 | 902868 | 1 transposase                                     |
| 902695 | 909146 | 6451 OXZ38117.1  | B9N56_04545 | 903099 | 904301 | -1 ABC transporter substrate-binding protein      |
| 902695 | 909146 | 6451 OXZ38118.1  | B9N56_04550 | 904301 | 904726 | -1 FMN-binding domain-containing protein          |
| 902695 | 909146 | 6451 OXZ38119.1  | B9N56_04555 | 904723 | 905442 | -1 GTPase                                         |
| 902695 | 909146 | 6451 OXZ38120.1  | B9N56_04560 | 905454 | 906602 | -1 ABC transporter permease                       |
| 902695 | 909146 | 6451 OXZ38121.1  | B9N56_04565 | 906592 | 907875 | -1 ABC transporter permease                       |
| 902695 | 909146 | 6451 OXZ38122.1  | B9N56_04570 | 907884 | 909146 | -1 hypothetical protein                           |
| 921983 | 941630 | 19647 OXZ38138.1 | B9N56_04660 | 921983 | 923374 | -1 ABC transporter ATP-binding protein            |
| 921983 | 941630 | 19647 OXZ38139.1 | B9N56_04665 | 923367 | 924068 | -1 cobalt ABC transporter permease                |
| 921983 | 941630 | 19647 OXZ38140.1 | B9N56_04670 | 924093 | 924674 | -1 hypothetical protein                           |
| 921983 | 941630 | 19647 OXZ38141.1 | B9N56_04675 | 924692 | 925303 | -1 TetR family transcriptional regulator          |
| 921983 | 941630 | 19647 OXZ38142.1 | B9N56_04680 | 925615 | 925971 | 1 plasmid mobilization relaxosome protein MobC    |
| 921983 | 941630 | 19647 OXZ38143.1 | B9N56_04685 | 925973 | 927304 | 1 endonuclease                                    |
| 921983 | 941630 | 19647            | B9N56_04690 | 927390 | 928475 | 1 IS256 family transposase                        |
| 921983 | 941630 | 19647 OXZ38144.1 | B9N56_04695 | 928580 | 930070 | -1 hypothetical protein                           |
| 921983 | 941630 | 19647 OXZ38145.1 | B9N56_04700 | 930073 | 930783 | -1 hypothetical protein                           |
| 921983 | 941630 | 19647 OXZ38146.1 | B9N56_04705 | 930784 | 931362 | -1 hypothetical protein                           |
| 921983 | 941630 | 19647 OXZ38147.1 | B9N56_04710 | 931377 | 933107 | -1 hypothetical protein                           |
| 921983 | 941630 | 19647            | B9N56_04715 | 934372 | 936342 | -1 DNA helicase                                   |
| 921983 | 941630 | 19647 OXZ37671.1 | B9N56_04720 | 936329 | 937294 | -1 DNA (cytosine-5-)-methyltransferase            |



|         |         |        |            |             |         |         |                                                   |
|---------|---------|--------|------------|-------------|---------|---------|---------------------------------------------------|
| 921983  | 941630  | 19647  | OXZ37672.1 | B9N56_04725 | 937287  | 939008  | -1 DNA topoisomerase III                          |
| 921983  | 941630  | 19647  | OXZ37673.1 | B9N56_04730 | 939097  | 940080  | -1 hypothetical protein                           |
| 921983  | 941630  | 19647  | OXZ37674.1 | B9N56_04735 | 940073  | 940684  | -1 hypothetical protein                           |
| 921983  | 941630  | 19647  | OXZ37675.1 | B9N56_04740 | 940758  | 941630  | -1 bacteriocin                                    |
| 953989  | 963820  | 9831   | OXZ37687.1 | B9N56_04805 | 953989  | 954186  | -1 hypothetical protein                           |
| 953989  | 963820  | 9831   | OXZ37640.1 | B9N56_04810 | 955228  | 955558  | -1 nickase                                        |
| 953989  | 963820  | 9831   | OXZ37641.1 | B9N56_04815 | 955872  | 956186  | -1 hypothetical protein                           |
| 953989  | 963820  | 9831   |            | B9N56_04820 | 956305  | 956403  | -1 hypothetical protein                           |
| 953989  | 963820  | 9831   | OXZ37642.1 | B9N56_04825 | 956449  | 957852  | -1 ABC transporter                                |
| 953989  | 963820  | 9831   | OXZ37643.1 | B9N56_04830 | 957857  | 958549  | -1 hypothetical protein                           |
| 953989  | 963820  | 9831   | OXZ37644.1 | B9N56_04835 | 958530  | 959117  | -1 hypothetical protein                           |
| 953989  | 963820  | 9831   | OXZ37645.1 | B9N56_04840 | 959141  | 960874  | -1 ABC transporter ATP-binding protein            |
| 953989  | 963820  | 9831   | OXZ37646.1 | B9N56_04845 | 960862  | 962601  | -1 ABC transporter ATP-binding protein            |
| 953989  | 963820  | 9831   | OXZ37647.1 | B9N56_04850 | 962906  | 963277  | -1 transcriptional regulator                      |
| 953989  | 963820  | 9831   |            | B9N56_04855 | 963398  | 963598  | -1 hypothetical protein                           |
| 953989  | 963820  | 9831   | OXZ37648.1 | B9N56_04860 | 963602  | 963820  | -1 transcriptional regulator                      |
| 974719  | 979692  | 4973   | OXZ37660.1 | B9N56_04920 | 974719  | 975048  | -1 hypothetical protein                           |
| 974719  | 979692  | 4973   | OXZ37661.1 | B9N56_04925 | 975133  | 975546  | -1 RNA polymerase subunit sigma-70                |
| 974719  | 979692  | 4973   | OXZ37662.1 | B9N56_04930 | 975834  | 977216  | -1 MATE family efflux transporter                 |
| 974719  | 979692  | 4973   | OXZ37663.1 | B9N56_04935 | 977218  | 979692  | -1 phosphoenolpyruvate synthase                   |
| 1190641 | 1202413 | 11772  | OXZ37235.1 | B9N56_05920 | 1190641 | 1190955 | 1 conjugal transfer protein                       |
| 1190641 | 1202413 | 11772  | OXZ37236.1 | B9N56_05925 | 1190971 | 1191357 | 1 conjugal transfer protein                       |
| 1190641 | 1202413 | 11772  |            | B9N56_05930 | 1191386 | 1192771 | 1 ATP-binding protein                             |
| 1190641 | 1202413 | 11772  |            | B9N56_05935 | 1192774 | 1192927 | 1 conjugal transfer protein                       |
| 1190641 | 1202413 | 11772  | OXZ37237.1 | B9N56_05940 | 1192950 | 1194155 | 1 Cro/Ci family transcriptional regulator         |
| 1190641 | 1202413 | 11772  | OXZ37238.1 | B9N56_05945 | 1194198 | 1194419 | 1 hypothetical protein                            |
| 1190641 | 1202413 | 11772  | OXZ37239.1 | B9N56_05950 | 1194536 | 1195033 | 1 antirestriction protein ArdA                    |
| 1190641 | 1202413 | 11772  | OXZ37240.1 | B9N56_05955 | 1195008 | 1195514 | 1 conjugal transfer protein                       |
| 1190641 | 1202413 | 11772  | OXZ37241.1 | B9N56_05960 | 1195498 | 1197945 | 1 ATP/GTP-binding protein                         |
| 1190641 | 1202413 | 11772  | OXZ37242.1 | B9N56_05965 | 1197948 | 1200125 | 1 hypothetical protein                            |
| 1190641 | 1202413 | 11772  | OXZ37243.1 | B9N56_05970 | 1200122 | 1201123 | 1 peptidase P60                                   |
| 1190641 | 1202413 | 11772  | OXZ37244.1 | B9N56_05975 | 1201120 | 1202052 | 1 conjugal transfer protein                       |
| 1190641 | 1202413 | 11772  | OXZ37245.1 | B9N56_05980 | 1202297 | 1202413 | 1 peptide                                         |
| 1317420 | 1321668 | 4248   | OXZ37344.1 | B9N56_06535 | 1317420 | 1318223 | -1 DNA-binding protein                            |
| 1317420 | 1321668 | 4248   | OXZ37345.1 | B9N56_06540 | 1318413 | 1319933 | -1 conjugal transfer protein                      |
| 1317420 | 1321668 | 4248   | OXZ37346.1 | B9N56_06545 | 1319926 | 1321668 | -1 recombinase                                    |
| 1317420 | 1321668 | 4248   | OXZ37347.1 | B9N56_06550 | 1321661 | 1323379 | -1 recombinase                                    |
| 1318413 | 1431755 | 113342 | OXZ37345.1 | B9N56_06540 | 1318413 | 1319933 | -1 conjugal transfer protein                      |
| 1318413 | 1431755 | 113342 | OXZ37346.1 | B9N56_06545 | 1319926 | 1321668 | -1 recombinase                                    |
| 1318413 | 1431755 | 113342 | OXZ37347.1 | B9N56_06550 | 1321661 | 1323379 | -1 recombinase                                    |
| 1318413 | 1431755 | 113342 | OXZ37348.1 | B9N56_06555 | 1323478 | 1323645 | -1 aminoacyl-tRNA hydrolase                       |
| 1318413 | 1431755 | 113342 | OXZ37349.1 | B9N56_06560 | 1324114 | 1324521 | -1 RNA polymerase subunit sigma                   |
| 1318413 | 1431755 | 113342 | OXZ37350.1 | B9N56_06565 | 1325321 | 1326664 | -1 MATE family efflux transporter                 |
| 1318413 | 1431755 | 113342 | OXZ37351.1 | B9N56_06570 | 1326676 | 1328424 | -1 ABC transporter ATP-binding protein            |
| 1318413 | 1431755 | 113342 | OXZ37352.1 | B9N56_06575 | 1328378 | 1330132 | -1 ABC transporter ATP-binding protein            |
| 1318413 | 1431755 | 113342 | OXZ37353.1 | B9N56_06580 | 1330281 | 1331240 | 1 AraC family transcriptional regulator           |
| 1318413 | 1431755 | 113342 | OXZ37354.1 | B9N56_06585 | 1331302 | 1332690 | -1 ABC transporter ATP-binding protein            |
| 1318413 | 1431755 | 113342 | OXZ37355.1 | B9N56_06590 | 1332701 | 1333357 | -1 cobalt transporter                             |
| 1318413 | 1431755 | 113342 | OXZ37356.1 | B9N56_06595 | 1333359 | 1333940 | -1 hypothetical protein                           |
| 1318413 | 1431755 | 113342 | OXZ37357.1 | B9N56_06600 | 1333951 | 1337238 | -1 hypothetical protein                           |
| 1318413 | 1431755 | 113342 | OXZ37358.1 | B9N56_06605 | 1337255 | 1338298 | -1 hypothetical protein                           |
| 1318413 | 1431755 | 113342 | OXZ37359.1 | B9N56_06610 | 1338295 | 1339740 | -1 hypothetical protein                           |
| 1318413 | 1431755 | 113342 | OXZ37360.1 | B9N56_06615 | 1339749 | 1341164 | -1 hypothetical protein                           |
| 1318413 | 1431755 | 113342 | OXZ37361.1 | B9N56_06620 | 1341167 | 1342213 | -1 hypothetical protein                           |
| 1318413 | 1431755 | 113342 | OXZ37362.1 | B9N56_06625 | 1342235 | 1345675 | -1 hypothetical protein                           |
| 1318413 | 1431755 | 113342 | OXZ37363.1 | B9N56_06630 | 1345688 | 1347274 | -1 2,3-dihydroxybenzoate-AMP ligase               |
| 1318413 | 1431755 | 113342 | OXZ37364.1 | B9N56_06635 | 1347271 | 1347957 | -1 4-phosphopantetheinyl transferase              |
| 1318413 | 1431755 | 113342 | OXZ37365.1 | B9N56_06640 | 1347959 | 1348699 | -1 thioesterase                                   |
| 1318413 | 1431755 | 113342 | OXZ37366.1 | B9N56_06645 | 1348820 | 1349788 | -1 3-deoxy-7-phosphoheptulonate synthase          |
| 1318413 | 1431755 | 113342 | OXZ37367.1 | B9N56_06650 | 1349804 | 1350232 | -1 type II 3-dehydroquinate dehydratase           |
| 1318413 | 1431755 | 113342 | OXZ37368.1 | B9N56_06655 | 1350210 | 1351451 | -1 shikimate dehydrogenase                        |
| 1318413 | 1431755 | 113342 | OXZ37369.1 | B9N56_06660 | 1351474 | 1352553 | -1 chorismate synthase                            |
| 1318413 | 1431755 | 113342 | OXZ37426.1 | B9N56_06665 | 1352540 | 1353832 | -1 3-phosphoshikimate 1-carboxyvinyltransferase   |
| 1318413 | 1431755 | 113342 | OXZ37370.1 | B9N56_06670 | 1353829 | 1354875 | -1 3-dehydroquinate synthase                      |
| 1318413 | 1431755 | 113342 | OXZ37371.1 | B9N56_06675 | 1354879 | 1356240 | -1 salicylate synthase                            |
| 1318413 | 1431755 | 113342 | OXZ37372.1 | B9N56_06680 | 1356436 | 1356828 | -1 transcriptional regulator                      |
| 1318413 | 1431755 | 113342 | OXZ37373.1 | B9N56_06685 | 1357265 | 1357633 | 1 plasmid mobilization relaxosome protein MobC    |
| 1318413 | 1431755 | 113342 | OXZ37374.1 | B9N56_06690 | 1357633 | 1359003 | 1 endonuclease                                    |
| 1318413 | 1431755 | 113342 | OXZ37375.1 | B9N56_06695 | 1359062 | 1359808 | -1 ABC transporter permease                       |
| 1318413 | 1431755 | 113342 | OXZ37376.1 | B9N56_06700 | 1359823 | 1360515 | -1 ABC transporter permease                       |
| 1318413 | 1431755 | 113342 | OXZ37377.1 | B9N56_06705 | 1360517 | 1361431 | -1 bacitracin ABC transporter ATP-binding protein |
| 1318413 | 1431755 | 113342 | OXZ37378.1 | B9N56_06710 | 1361446 | 1362603 | -1 hypothetical protein                           |
| 1318413 | 1431755 | 113342 | OXZ37379.1 | B9N56_06715 | 1362607 | 1363914 | -1 hypothetical protein                           |
| 1318413 | 1431755 | 113342 | OXZ37380.1 | B9N56_06720 | 1364553 | 1364984 | -1 hypothetical protein                           |
| 1318413 | 1431755 | 113342 | OXZ37381.1 | B9N56_06725 | 1364997 | 1365260 | -1 hypothetical protein                           |
| 1318413 | 1431755 | 113342 | OXZ37382.1 | B9N56_06730 | 1365254 | 1365823 | -1 hypothetical protein                           |

|         |         |                   |             |         |         |                                                    |
|---------|---------|-------------------|-------------|---------|---------|----------------------------------------------------|
| 1318413 | 1431755 | 113342            | B9N56_06735 | 1366162 | 1366485 | 1 relaxase                                         |
| 1318413 | 1431755 | 113342 OXZ37383.1 | B9N56_06740 | 1366606 | 1366953 | -1 DUF3784 domain-containing protein               |
| 1318413 | 1431755 | 113342 OXZ37384.1 | B9N56_06745 | 1366961 | 1368337 | -1 hypothetical protein                            |
| 1318413 | 1431755 | 113342 OXZ37385.1 | B9N56_06750 | 1368347 | 1369141 | -1 hypothetical protein                            |
| 1318413 | 1431755 | 113342 OXZ37386.1 | B9N56_06755 | 1369131 | 1370177 | -1 hypothetical protein                            |
| 1318413 | 1431755 | 113342 OXZ37387.1 | B9N56_06760 | 1370179 | 1371825 | -1 hypothetical protein                            |
| 1318413 | 1431755 | 113342 OXZ37388.1 | B9N56_06765 | 1372083 | 1372292 | -1 hypothetical protein                            |
| 1318413 | 1431755 | 113342 OXZ37389.1 | B9N56_06770 | 1372602 | 1374263 | -1 ABC transporter permease                        |
| 1318413 | 1431755 | 113342 OXZ37390.1 | B9N56_06775 | 1374256 | 1374522 | -1 protein                                         |
| 1318413 | 1431755 | 113342 OXZ37391.1 | B9N56_06780 | 1374524 | 1376713 | -1 radical SAM protein                             |
| 1318413 | 1431755 | 113342 OXZ37392.1 | B9N56_06785 | 1376700 | 1376882 | -1 hypothetical protein                            |
| 1318413 | 1431755 | 113342            | B9N56_06790 | 1377012 | 1377617 | -1 DNA-binding response regulator                  |
| 1318413 | 1431755 | 113342 OXZ37393.1 | B9N56_06795 | 1377589 | 1379136 | -1 hypothetical protein                            |
| 1318413 | 1431755 | 113342 OXZ37394.1 | B9N56_06800 | 1379450 | 1380544 | -1 single-stranded DNA-binding protein             |
| 1318413 | 1431755 | 113342 OXZ37395.1 | B9N56_06805 | 1380577 | 1390998 | -1 conjugal transfer protein                       |
| 1318413 | 1431755 | 113342 OXZ37396.1 | B9N56_06810 | 1391191 | 1391517 | -1 terminase large subunit                         |
| 1318413 | 1431755 | 113342 OXZ37397.1 | B9N56_06815 | 1391859 | 1393565 | -1 DNA topoisomerase III                           |
| 1318413 | 1431755 | 113342 OXZ37398.1 | B9N56_06820 | 1393635 | 1394474 | -1 abortive phage infection protein                |
| 1318413 | 1431755 | 113342 OXZ37399.1 | B9N56_06825 | 1394467 | 1395060 | -1 abortive phage infection protein                |
| 1318413 | 1431755 | 113342 OXZ37400.1 | B9N56_06830 | 1395375 | 1396253 | -1 bacteriocin                                     |
| 1318413 | 1431755 | 113342 OXZ37401.1 | B9N56_06835 | 1396269 | 1398623 | -1 copper amine oxidase                            |
| 1318413 | 1431755 | 113342 OXZ37402.1 | B9N56_06840 | 1398620 | 1398877 | -1 hypothetical protein                            |
| 1318413 | 1431755 | 113342 OXZ37403.1 | B9N56_06845 | 1398897 | 1401860 | -1 hypothetical protein                            |
| 1318413 | 1431755 | 113342 OXZ37404.1 | B9N56_06850 | 1401870 | 1402835 | -1 site-specific DNA-methyltransferase             |
| 1318413 | 1431755 | 113342 OXZ37405.1 | B9N56_06855 | 1402807 | 1405302 | -1 DUF87 domain-containing protein                 |
| 1318413 | 1431755 | 113342 OXZ37406.1 | B9N56_06860 | 1405299 | 1405637 | -1 conjugal transfer protein                       |
| 1318413 | 1431755 | 113342 OXZ37407.1 | B9N56_06865 | 1405637 | 1405894 | -1 hypothetical protein                            |
| 1318413 | 1431755 | 113342 OXZ37408.1 | B9N56_06870 | 1405912 | 1406775 | -1 hypothetical protein                            |
| 1318413 | 1431755 | 113342 OXZ37409.1 | B9N56_06875 | 1406777 | 1406992 | -1 conjugal transfer protein                       |
| 1318413 | 1431755 | 113342 OXZ37410.1 | B9N56_06880 | 1406993 | 1407316 | -1 single-stranded DNA-binding protein             |
| 1318413 | 1431755 | 113342 OXZ37411.1 | B9N56_06885 | 1407507 | 1408370 | -1 CAAX protease                                   |
| 1318413 | 1431755 | 113342            | B9N56_06890 | 1408522 | 1409337 | -1 conjugal transfer protein TraG                  |
| 1318413 | 1431755 | 113342 OXZ37412.1 | B9N56_06895 | 1409349 | 1409534 | -1 hypothetical protein                            |
| 1318413 | 1431755 | 113342 OXZ37413.1 | B9N56_06900 | 1409693 | 1410406 | -1 replisome organizer                             |
| 1318413 | 1431755 | 113342 OXZ37414.1 | B9N56_06905 | 1410478 | 1411551 | -1 hypothetical protein                            |
| 1318413 | 1431755 | 113342 OXZ37415.1 | B9N56_06910 | 1411701 | 1412180 | -1 replication protein                             |
| 1318413 | 1431755 | 113342 OXZ36991.1 | B9N56_06915 | 1413247 | 1413577 | -1 nickase                                         |
| 1318413 | 1431755 | 113342 OXZ36992.1 | B9N56_06920 | 1413911 | 1414201 | -1 hypothetical protein                            |
| 1318413 | 1431755 | 113342 OXZ36993.1 | B9N56_06925 | 1414300 | 1414521 | -1 hypothetical protein                            |
| 1318413 | 1431755 | 113342 OXZ36994.1 | B9N56_06930 | 1414542 | 1415051 | -1 RDD family protein                              |
| 1318413 | 1431755 | 113342 OXZ36995.1 | B9N56_06935 | 1415221 | 1416297 | -1 two-component sensor histidine kinase           |
| 1318413 | 1431755 | 113342 OXZ36996.1 | B9N56_06940 | 1416287 | 1416967 | -1 DNA-binding response regulator                  |
| 1318413 | 1431755 | 113342 OXZ36997.1 | B9N56_06945 | 1416979 | 1417746 | -1 hypothetical protein                            |
| 1318413 | 1431755 | 113342 OXZ36998.1 | B9N56_06950 | 1417755 | 1418480 | -1 hypothetical protein                            |
| 1318413 | 1431755 | 113342 OXZ36999.1 | B9N56_06955 | 1418461 | 1419204 | -1 ABC transporter ATP-binding protein             |
| 1318413 | 1431755 | 113342 OXZ37000.1 | B9N56_06960 | 1419437 | 1419736 | -1 hypothetical protein                            |
| 1318413 | 1431755 | 113342 OXZ37001.1 | B9N56_06965 | 1419839 | 1420276 | -1 hypothetical protein                            |
| 1318413 | 1431755 | 113342 OXZ37002.1 | B9N56_06970 | 1420397 | 1420729 | -1 hypothetical protein                            |
| 1318413 | 1431755 | 113342 OXZ37003.1 | B9N56_06975 | 1421029 | 1422471 | -1 histidine kinase                                |
| 1318413 | 1431755 | 113342 OXZ37004.1 | B9N56_06980 | 1422462 | 1423124 | -1 DNA-binding response regulator                  |
| 1318413 | 1431755 | 113342 OXZ37005.1 | B9N56_06985 | 1423249 | 1423989 | -1 lantibiotic ABC transporter permease            |
| 1318413 | 1431755 | 113342 OXZ37006.1 | B9N56_06990 | 1423995 | 1424744 | -1 lantibiotic ABC transporter permease            |
| 1318413 | 1431755 | 113342 OXZ37007.1 | B9N56_06995 | 1424737 | 1425447 | -1 lantibiotic ABC transporter ATP-binding protein |
| 1318413 | 1431755 | 113342            | B9N56_07000 | 1425648 | 1427437 | -1 recombinase TnpX                                |
| 1318413 | 1431755 | 113342 OXZ37008.1 | B9N56_07005 | 1427477 | 1428535 | -1 conjugal transfer protein TraG                  |
| 1318413 | 1431755 | 113342 OXZ37009.1 | B9N56_07010 | 1428580 | 1428786 | -1 hypothetical protein                            |
| 1318413 | 1431755 | 113342 OXZ37010.1 | B9N56_07015 | 1428984 | 1429475 | -1 hypothetical protein                            |
| 1318413 | 1431755 | 113342 OXZ37011.1 | B9N56_07020 | 1429490 | 1430347 | -1 DNA replication protein                         |
| 1318413 | 1431755 | 113342 OXZ37012.1 | B9N56_07025 | 1430362 | 1431339 | -1 replication initiator RepA                      |
| 1318413 | 1431755 | 113342 OXZ37013.1 | B9N56_07030 | 1431465 | 1431755 | -1 hypothetical protein                            |
| 1323478 | 1372292 | 48814 OXZ37348.1  | B9N56_06555 | 1323478 | 1323645 | -1 aminoacyl-tRNA hydrolase                        |
| 1323478 | 1372292 | 48814 OXZ37349.1  | B9N56_06560 | 1324114 | 1324521 | -1 RNA polymerase subunit sigma                    |
| 1323478 | 1372292 | 48814 OXZ37350.1  | B9N56_06565 | 1325321 | 1326664 | -1 MATE family efflux transporter                  |
| 1323478 | 1372292 | 48814 OXZ37351.1  | B9N56_06570 | 1326676 | 1328424 | -1 ABC transporter ATP-binding protein             |
| 1323478 | 1372292 | 48814 OXZ37352.1  | B9N56_06575 | 1328378 | 1330132 | -1 ABC transporter ATP-binding protein             |
| 1323478 | 1372292 | 48814 OXZ37353.1  | B9N56_06580 | 1330281 | 1331240 | 1 AraC family transcriptional regulator            |
| 1323478 | 1372292 | 48814 OXZ37354.1  | B9N56_06585 | 1331302 | 1332690 | -1 ABC transporter ATP-binding protein             |
| 1323478 | 1372292 | 48814 OXZ37355.1  | B9N56_06590 | 1332701 | 1333357 | -1 cobalt transporter                              |
| 1323478 | 1372292 | 48814 OXZ37356.1  | B9N56_06595 | 1333359 | 1333940 | -1 hypothetical protein                            |
| 1323478 | 1372292 | 48814 OXZ37357.1  | B9N56_06600 | 1333951 | 1337238 | -1 hypothetical protein                            |
| 1323478 | 1372292 | 48814 OXZ37358.1  | B9N56_06605 | 1337255 | 1338298 | -1 hypothetical protein                            |
| 1323478 | 1372292 | 48814 OXZ37359.1  | B9N56_06610 | 1338295 | 1339740 | -1 hypothetical protein                            |
| 1323478 | 1372292 | 48814 OXZ37360.1  | B9N56_06615 | 1339749 | 1341164 | -1 hypothetical protein                            |
| 1323478 | 1372292 | 48814 OXZ37361.1  | B9N56_06620 | 1341167 | 1342213 | -1 hypothetical protein                            |
| 1323478 | 1372292 | 48814 OXZ37362.1  | B9N56_06625 | 1342235 | 1345675 | -1 hypothetical protein                            |
| 1323478 | 1372292 | 48814 OXZ37363.1  | B9N56_06630 | 1345688 | 1347274 | -1 2,3-dihydroxybenzoate-AMP ligase                |

|         |         |                  |             |         |         |                                                   |
|---------|---------|------------------|-------------|---------|---------|---------------------------------------------------|
| 1323478 | 1372292 | 48814 OXZ37364.1 | B9N56_06635 | 1347271 | 1347957 | -1 4-phosphopantetheinyl transferase              |
| 1323478 | 1372292 | 48814 OXZ37365.1 | B9N56_06640 | 1347959 | 1348699 | -1 thioesterase                                   |
| 1323478 | 1372292 | 48814 OXZ37366.1 | B9N56_06645 | 1348820 | 1349788 | -1 3-deoxy-7-phosphoheptulonate synthase          |
| 1323478 | 1372292 | 48814 OXZ37367.1 | B9N56_06650 | 1349804 | 1350232 | -1 type II 3-dehydroquinone dehydratase           |
| 1323478 | 1372292 | 48814 OXZ37368.1 | B9N56_06655 | 1350210 | 1351451 | -1 shikimate dehydrogenase                        |
| 1323478 | 1372292 | 48814 OXZ37369.1 | B9N56_06660 | 1351474 | 1352553 | -1 chorismate synthase                            |
| 1323478 | 1372292 | 48814 OXZ37426.1 | B9N56_06665 | 1352540 | 1353832 | -1 3-phosphoshikimate 1-carboxyvinyltransferase   |
| 1323478 | 1372292 | 48814 OXZ37370.1 | B9N56_06670 | 1353829 | 1354875 | -1 3-dehydroquinone synthase                      |
| 1323478 | 1372292 | 48814 OXZ37371.1 | B9N56_06675 | 1354879 | 1356240 | -1 salicylate synthase                            |
| 1323478 | 1372292 | 48814 OXZ37372.1 | B9N56_06680 | 1356436 | 1356828 | -1 transcriptional regulator                      |
| 1323478 | 1372292 | 48814 OXZ37373.1 | B9N56_06685 | 1357265 | 1357633 | 1 plasmid mobilization relaxosome protein MobC    |
| 1323478 | 1372292 | 48814 OXZ37374.1 | B9N56_06690 | 1357633 | 1359003 | 1 endonuclease                                    |
| 1323478 | 1372292 | 48814 OXZ37375.1 | B9N56_06695 | 1359062 | 1359808 | -1 ABC transporter permease                       |
| 1323478 | 1372292 | 48814 OXZ37376.1 | B9N56_06700 | 1359823 | 1360515 | -1 ABC transporter permease                       |
| 1323478 | 1372292 | 48814 OXZ37377.1 | B9N56_06705 | 1360517 | 1361431 | -1 bacitracin ABC transporter ATP-binding protein |
| 1323478 | 1372292 | 48814 OXZ37378.1 | B9N56_06710 | 1361446 | 1362603 | -1 hypothetical protein                           |
| 1323478 | 1372292 | 48814 OXZ37379.1 | B9N56_06715 | 1362607 | 1363914 | -1 hypothetical protein                           |
| 1323478 | 1372292 | 48814 OXZ37380.1 | B9N56_06720 | 1364553 | 1364984 | -1 hypothetical protein                           |
| 1323478 | 1372292 | 48814 OXZ37381.1 | B9N56_06725 | 1364997 | 1365260 | -1 hypothetical protein                           |
| 1323478 | 1372292 | 48814 OXZ37382.1 | B9N56_06730 | 1365254 | 1365823 | -1 hypothetical protein                           |
| 1323478 | 1372292 | 48814            | B9N56_06735 | 1366162 | 1366485 | 1 relaxase                                        |
| 1323478 | 1372292 | 48814 OXZ37383.1 | B9N56_06740 | 1366606 | 1366953 | -1 DUF3784 domain-containing protein              |
| 1323478 | 1372292 | 48814 OXZ37384.1 | B9N56_06745 | 1366961 | 1368337 | -1 hypothetical protein                           |
| 1323478 | 1372292 | 48814 OXZ37385.1 | B9N56_06750 | 1368347 | 1369141 | -1 hypothetical protein                           |
| 1323478 | 1372292 | 48814 OXZ37386.1 | B9N56_06755 | 1369131 | 1370177 | -1 hypothetical protein                           |
| 1323478 | 1372292 | 48814 OXZ37387.1 | B9N56_06760 | 1370179 | 1371825 | -1 hypothetical protein                           |
| 1323478 | 1372292 | 48814 OXZ37388.1 | B9N56_06765 | 1372083 | 1372292 | -1 hypothetical protein                           |
| 1374256 | 1401860 | 27604 OXZ37389.1 | B9N56_06770 | 1372602 | 1374263 | -1 ABC transporter permease                       |
| 1374256 | 1401860 | 27604 OXZ37390.1 | B9N56_06775 | 1374256 | 1374522 | -1 protein                                        |
| 1374256 | 1401860 | 27604 OXZ37391.1 | B9N56_06780 | 1374524 | 1376713 | -1 radical SAM protein                            |
| 1374256 | 1401860 | 27604 OXZ37392.1 | B9N56_06785 | 1376700 | 1376882 | -1 hypothetical protein                           |
| 1374256 | 1401860 | 27604            | B9N56_06790 | 1377012 | 1377617 | -1 DNA-binding response regulator                 |
| 1374256 | 1401860 | 27604 OXZ37393.1 | B9N56_06795 | 1377589 | 1379136 | -1 hypothetical protein                           |
| 1374256 | 1401860 | 27604 OXZ37394.1 | B9N56_06800 | 1379450 | 1380544 | -1 single-stranded DNA-binding protein            |
| 1374256 | 1401860 | 27604 OXZ37395.1 | B9N56_06805 | 1380577 | 1390998 | -1 conjugal transfer protein                      |
| 1374256 | 1401860 | 27604 OXZ37396.1 | B9N56_06810 | 1391191 | 1391517 | -1 terminase large subunit                        |
| 1374256 | 1401860 | 27604 OXZ37397.1 | B9N56_06815 | 1391859 | 1393565 | -1 DNA topoisomerase III                          |
| 1374256 | 1401860 | 27604 OXZ37398.1 | B9N56_06820 | 1393635 | 1394474 | -1 abortive phage infection protein               |
| 1374256 | 1401860 | 27604 OXZ37399.1 | B9N56_06825 | 1394467 | 1395060 | -1 abortive phage infection protein               |
| 1374256 | 1401860 | 27604 OXZ37400.1 | B9N56_06830 | 1395375 | 1396253 | -1 bacteriocin                                    |
| 1374256 | 1401860 | 27604 OXZ37401.1 | B9N56_06835 | 1396269 | 1398623 | -1 copper amine oxidase                           |
| 1374256 | 1401860 | 27604 OXZ37402.1 | B9N56_06840 | 1398620 | 1398877 | -1 hypothetical protein                           |
| 1374256 | 1401860 | 27604 OXZ37403.1 | B9N56_06845 | 1398897 | 1401860 | -1 hypothetical protein                           |
| 1405299 | 1420729 | 15430 OXZ37405.1 | B9N56_06855 | 1402807 | 1405302 | -1 DUF87 domain-containing protein                |
| 1405299 | 1420729 | 15430 OXZ37406.1 | B9N56_06860 | 1405299 | 1405637 | -1 conjugal transfer protein                      |
| 1405299 | 1420729 | 15430 OXZ37407.1 | B9N56_06865 | 1405637 | 1405894 | -1 hypothetical protein                           |
| 1405299 | 1420729 | 15430 OXZ37408.1 | B9N56_06870 | 1405912 | 1406775 | -1 hypothetical protein                           |
| 1405299 | 1420729 | 15430 OXZ37409.1 | B9N56_06875 | 1406777 | 1406992 | -1 conjugal transfer protein                      |
| 1405299 | 1420729 | 15430 OXZ37410.1 | B9N56_06880 | 1406993 | 1407316 | -1 single-stranded DNA-binding protein            |
| 1405299 | 1420729 | 15430 OXZ37411.1 | B9N56_06885 | 1407507 | 1408370 | -1 CAAX protease                                  |
| 1405299 | 1420729 | 15430            | B9N56_06890 | 1408522 | 1409337 | -1 conjugal transfer protein TraG                 |
| 1405299 | 1420729 | 15430 OXZ37412.1 | B9N56_06895 | 1409349 | 1409534 | -1 hypothetical protein                           |
| 1405299 | 1420729 | 15430 OXZ37413.1 | B9N56_06900 | 1409693 | 1410406 | -1 replisome organizer                            |
| 1405299 | 1420729 | 15430 OXZ37414.1 | B9N56_06905 | 1410478 | 1411551 | -1 hypothetical protein                           |
| 1405299 | 1420729 | 15430 OXZ37415.1 | B9N56_06910 | 1411701 | 1412180 | -1 replication protein                            |
| 1405299 | 1420729 | 15430 OXZ36991.1 | B9N56_06915 | 1413247 | 1413577 | -1 nickase                                        |
| 1405299 | 1420729 | 15430 OXZ36992.1 | B9N56_06920 | 1413911 | 1414201 | -1 hypothetical protein                           |
| 1405299 | 1420729 | 15430 OXZ36993.1 | B9N56_06925 | 1414300 | 1414521 | -1 hypothetical protein                           |
| 1405299 | 1420729 | 15430 OXZ36994.1 | B9N56_06930 | 1414542 | 1415051 | -1 RDD family protein                             |
| 1405299 | 1420729 | 15430 OXZ36995.1 | B9N56_06935 | 1415221 | 1416297 | -1 two-component sensor histidine kinase          |
| 1405299 | 1420729 | 15430 OXZ36996.1 | B9N56_06940 | 1416287 | 1416967 | -1 DNA-binding response regulator                 |
| 1405299 | 1420729 | 15430 OXZ36997.1 | B9N56_06945 | 1416979 | 1417746 | -1 hypothetical protein                           |
| 1405299 | 1420729 | 15430 OXZ36998.1 | B9N56_06950 | 1417755 | 1418480 | -1 hypothetical protein                           |
| 1405299 | 1420729 | 15430 OXZ36999.1 | B9N56_06955 | 1418461 | 1419204 | -1 ABC transporter ATP-binding protein            |
| 1405299 | 1420729 | 15430 OXZ37000.1 | B9N56_06960 | 1419437 | 1419736 | -1 hypothetical protein                           |
| 1405299 | 1420729 | 15430 OXZ37001.1 | B9N56_06965 | 1419839 | 1420276 | -1 hypothetical protein                           |
| 1405299 | 1420729 | 15430 OXZ37002.1 | B9N56_06970 | 1420397 | 1420729 | -1 hypothetical protein                           |
| 1557581 | 1566142 | 8561             | B9N56_07590 | 1557581 | 1558190 | -1 SAM-dependent methyltransferase                |
| 1557581 | 1566142 | 8561 OXZ36941.1  | B9N56_07595 | 1558406 | 1559155 | -1 phosphorylase                                  |
| 1557581 | 1566142 | 8561 OXZ36942.1  | B9N56_07600 | 1559285 | 1560886 | -1 macrolide ABC transporter ATP-binding protein  |
| 1557581 | 1566142 | 8561 OXZ36943.1  | B9N56_07605 | 1561291 | 1561905 | -1 hypothetical protein                           |
| 1557581 | 1566142 | 8561 OXZ36944.1  | B9N56_07610 | 1562111 | 1563475 | -1 ABC transporter ATP-binding protein            |
| 1557581 | 1566142 | 8561 OXZ36945.1  | B9N56_07615 | 1563469 | 1564158 | -1 cobalt ABC transporter permease                |
| 1557581 | 1566142 | 8561 OXZ36946.1  | B9N56_07620 | 1564158 | 1564739 | -1 hypothetical protein                           |
| 1557581 | 1566142 | 8561 OXZ36960.1  | B9N56_07625 | 1564799 | 1566142 | -1 MATE family efflux transporter                 |
| 1575901 | 1586348 | 10447            | B9N56_07675 | 1575901 | 1576179 | -1 AraC family transcriptional regulator          |



|         |         |                  |             |         |         |                                                |
|---------|---------|------------------|-------------|---------|---------|------------------------------------------------|
| 1575901 | 1586348 | 10447            | B9N56_07680 | 1576714 | 1576923 | -1 hypothetical protein                        |
| 1575901 | 1586348 | 10447 OXZ36956.1 | B9N56_07685 | 1577181 | 1577573 | -1 hypothetical protein                        |
| 1575901 | 1586348 | 10447 OXZ36961.1 | B9N56_07690 | 1578112 | 1578495 | -1 hypothetical protein                        |
| 1575901 | 1586348 | 10447 OXZ36957.1 | B9N56_07695 | 1579994 | 1580644 | -1 hypothetical protein                        |
| 1575901 | 1586348 | 10447 OXZ36958.1 | B9N56_07700 | 1580950 | 1581436 | -1 phosphorylase                               |
| 1575901 | 1586348 | 10447 OXZ36826.1 | B9N56_07705 | 1582716 | 1585109 | -1 hypothetical protein                        |
| 1575901 | 1586348 | 10447            | B9N56_07710 | 1585102 | 1585322 | -1 transcriptional regulator                   |
| 1575901 | 1586348 | 10447 OXZ36827.1 | B9N56_07715 | 1585737 | 1586348 | -1 SAM-dependent methyltransferase             |
| 1604844 | 1611673 | 6829 OXZ36840.1  | B9N56_07790 | 1604844 | 1605143 | 1 plasmid mobilization relaxosome protein MobC |
| 1604844 | 1611673 | 6829             | B9N56_07795 | 1605202 | 1605936 | 1 relaxase                                     |
| 1604844 | 1611673 | 6829             | B9N56_07800 | 1606003 | 1606533 | 1 hypothetical protein                         |
| 1604844 | 1611673 | 6829 OXZ36841.1  | B9N56_07805 | 1606842 | 1609601 | -1 hypothetical protein                        |
| 1604844 | 1611673 | 6829 OXZ36842.1  | B9N56_07810 | 1609861 | 1610073 | -1 DNA-binding protein                         |
| 1604844 | 1611673 | 6829             | B9N56_07815 | 1610249 | 1611089 | -1 abortive phage infection protein            |
| 1604844 | 1611673 | 6829 OXZ36843.1  | B9N56_07820 | 1611086 | 1611673 | -1 transcriptional regulator                   |

**Table S3C: Predicted genomic islands in the genome of *F. magna* 09T408**

Shown are genes of genomic islands predicted by IslandViewer4

| Island start | Island end | Length | Gene name  | Locus       | Gene start | Gene end | Strand | Product                                        |
|--------------|------------|--------|------------|-------------|------------|----------|--------|------------------------------------------------|
| 7930         | 14062      | 6132   | OXZ32095.1 | B9N57_00015 | 7930       | 8017     | 1      | hypothetical protein                           |
| 7930         | 14062      | 6132   | OXZ32096.1 | B9N57_00020 | 8081       | 8533     | -1     | small-multidrug export protein                 |
| 7930         | 14062      | 6132   | OXZ32097.1 | B9N57_00025 | 8542       | 9192     | -1     | phosphatase                                    |
| 7930         | 14062      | 6132   | OXZ32098.1 | B9N57_00030 | 9354       | 10586    | 1      | aminopeptidase                                 |
| 7930         | 14062      | 6132   | OXZ32099.1 | B9N57_00035 | 10586      | 12382    | 1      | oligoendopeptidase F                           |
| 7930         | 14062      | 6132   | OXZ32100.1 | B9N57_00040 | 12433      | 13317    | 1      | antibiotic ABC transporter ATP-binding protein |
| 7930         | 14062      | 6132   | OXZ32101.1 | B9N57_00045 | 13310      | 14062    | 1      | antibiotic ABC transporter permease            |
| 7930         | 14062      | 6132   | OXZ32102.1 | B9N57_00050 | 14052      | 14723    | 1      | antibiotic ABC transporter permease            |
| 72169        | 82578      | 10409  | OXZ31830.1 | B9N57_00255 | 72169      | 73038    | 1      | hypothetical protein                           |
| 72169        | 82578      | 10409  | OXZ31831.1 | B9N57_00260 | 73025      | 75013    | 1      | exopolyphosphatase                             |
| 72169        | 82578      | 10409  | OXZ31832.1 | B9N57_00265 | 74994      | 75440    | 1      | 50S ribosomal protein L9                       |
| 72169        | 82578      | 10409  | OXZ31833.1 | B9N57_00270 | 75474      | 76811    | 1      | replicative DNA helicase                       |
| 72169        | 82578      | 10409  | OXZ31834.1 | B9N57_00275 | 76808      | 77371    | 1      | N-acetyltransferase                            |
| 72169        | 82578      | 10409  | OXZ31835.1 | B9N57_00280 | 77376      | 78134    | 1      | DNA replication protein                        |
| 72169        | 82578      | 10409  | OXZ31836.1 | B9N57_00285 | 78137      | 79114    | 1      | DNA replication protein DnaC                   |
| 72169        | 82578      | 10409  | OXZ31837.1 | B9N57_00290 | 79111      | 79755    | 1      | NAD(P)H-hydrate epimerase                      |
| 72169        | 82578      | 10409  | OXZ31838.1 | B9N57_00295 | 80595      | 81137    | 1      | ECF transporter S component                    |
| 72169        | 82578      | 10409  | OXZ31839.1 | B9N57_00300 | 81121      | 81807    | 1      | radical SAM protein                            |
| 72169        | 82578      | 10409  | OXZ31840.1 | B9N57_00305 | 81874      | 82578    | 1      | hypothetical protein                           |
| 182046       | 186690     | 4644   | OXZ31460.1 | B9N57_00845 | 182046     | 182687   | -1     | hemolysin III                                  |
| 182046       | 186690     | 4644   | OXZ31461.1 | B9N57_00850 | 182841     | 183344   | 1      | acetyltransferase                              |
| 182046       | 186690     | 4644   | OXZ31462.1 | B9N57_00855 | 183344     | 184078   | 1      | hydrolase                                      |
| 182046       | 186690     | 4644   | OXZ31379.1 | B9N57_00860 | 185725     | 186096   | 1      | hypothetical protein                           |
| 182046       | 186690     | 4644   | OXZ31450.1 | B9N57_00865 | 186343     | 186690   | -1     | toxin MazF                                     |
| 315622       | 325971     | 10349  |            | B9N57_01460 | 315622     | 315807   | 1      | DUF4926 domain-containing protein              |
| 315622       | 325971     | 10349  | OXZ31235.1 | B9N57_01465 | 316623     | 319379   | 1      | Cas3                                           |
| 315622       | 325971     | 10349  | OXZ31236.1 | B9N57_01470 | 319372     | 321093   | 1      | hypothetical protein                           |
| 315622       | 325971     | 10349  | OXZ31237.1 | B9N57_01475 | 321105     | 321710   | 1      | type I-E CRISPR-associated protein Cse2/CasB   |
| 315622       | 325971     | 10349  | OXZ31238.1 | B9N57_01480 | 321694     | 322776   | 1      | Cas7/Cse4/CasC                                 |
| 315622       | 325971     | 10349  | OXZ31239.1 | B9N57_01485 | 322786     | 323490   | 1      | type I-E CRISPR-associated protein Cas5/CasD   |
| 315622       | 325971     | 10349  | OXZ31240.1 | B9N57_01490 | 323494     | 324147   | 1      | Cas6/Cse3/CasE                                 |
| 315622       | 325971     | 10349  | OXZ31241.1 | B9N57_01495 | 324144     | 325082   | 1      | Cas1                                           |
| 315622       | 325971     | 10349  | OXZ31242.1 | B9N57_01500 | 325084     | 325971   | 1      | Cas2                                           |
| 750468       | 761175     | 10707  | OXZ30582.1 | B9N57_03715 | 750468     | 751166   | 1      | DNA-binding response regulator                 |
| 750468       | 761175     | 10707  | OXZ30583.1 | B9N57_03720 | 751207     | 751791   | 1      | peptidylprolyl isomerase                       |
| 750468       | 761175     | 10707  | OXZ30584.1 | B9N57_03725 | 751793     | 752425   | 1      | thymidine kinase                               |
| 750468       | 761175     | 10707  | OXZ30585.1 | B9N57_03730 | 752447     | 752917   | -1     | S-ribosylhomocysteine lyase                    |
| 750468       | 761175     | 10707  | OXZ30586.1 | B9N57_03735 | 752926     | 754029   | -1     | rod shape-determining protein RodA             |
| 750468       | 761175     | 10707  | OXZ30587.1 | B9N57_03740 | 754104     | 754937   | 1      | endonuclease IV                                |
| 750468       | 761175     | 10707  | OXZ30588.1 | B9N57_03745 | 754918     | 755544   | 1      | endonuclease III                               |
| 750468       | 761175     | 10707  | OXZ30589.1 | B9N57_03750 | 755612     | 756532   | 1      | aspartate carbamoyltransferase                 |
| 750468       | 761175     | 10707  | OXZ30590.1 | B9N57_03755 | 756532     | 756960   | 1      | subunit                                        |
| 750468       | 761175     | 10707  | OXZ30591.1 | B9N57_03760 | 756960     | 758156   | 1      | dihydroorotase                                 |
| 750468       | 761175     | 10707  | OXZ30592.1 | B9N57_03765 | 758143     | 758994   | 1      | orotidine-5'-phosphate decarboxylase           |
| 750468       | 761175     | 10707  | OXZ30593.1 | B9N57_03770 | 758987     | 759703   | 1      | subunit                                        |
| 750468       | 761175     | 10707  | OXZ30594.1 | B9N57_03775 | 759696     | 760592   | 1      | subunit                                        |
| 750468       | 761175     | 10707  | OXZ30595.1 | B9N57_03780 | 760603     | 761175   | 1      | orotate phosphoribosyltransferase              |
| 775045       | 779501     | 4456   | OXZ30608.1 | B9N57_03845 | 775045     | 775842   | 1      | hypothetical protein                           |
| 775045       | 779501     | 4456   | OXZ30609.1 | B9N57_03850 | 775926     | 777383   | 1      | serine/threonine protein kinase                |
| 775045       | 779501     | 4456   | OXZ30610.1 | B9N57_03855 | 777385     | 778059   | 1      | protein phosphatase                            |
| 775045       | 779501     | 4456   | OXZ30611.1 | B9N57_03860 | 778116     | 779501   | 1      | methylthiotransferase MiaB                     |
| 812488       | 816921     | 4433   | OXZ30642.1 | B9N57_04025 | 812488     | 812823   | -1     | histidine triad nucleotide-binding protein     |
| 812488       | 816921     | 4433   | OXZ30643.1 | B9N57_04030 | 812870     | 814162   | -1     | C(2)-methylthiotransferase MtaB                |
| 812488       | 816921     | 4433   | OXZ30644.1 | B9N57_04035 | 814165     | 814887   | -1     | rRNA methyltransferase                         |
| 812488       | 816921     | 4433   | OXZ30645.1 | B9N57_04040 | 814880     | 815803   | -1     | 50S ribosomal protein L11 methyltransferase    |
| 812488       | 816921     | 4433   | OXZ30646.1 | B9N57_04045 | 815803     | 816921   | -1     | molecular chaperone DnaJ                       |
| 983705       | 989288     | 5583   |            | B9N57_04800 | 983705     | 984169   | -1     | IS200/IS605 family transposase                 |
| 983705       | 989288     | 5583   | OXZ30387.1 | B9N57_04805 | 984389     | 984676   | -1     | cupin                                          |
| 983705       | 989288     | 5583   | OXZ30388.1 | B9N57_04810 | 984743     | 985315   | -1     | uracil-DNA glycosylase                         |
| 983705       | 989288     | 5583   |            | B9N57_04815 | 985454     | 985657   | -1     | hypothetical protein                           |
| 983705       | 989288     | 5583   |            | B9N57_04820 | 985647     | 985930   | -1     | hypothetical protein                           |
| 983705       | 989288     | 5583   |            | B9N57_04825 | 985932     | 986735   | -1     | ABC transporter                                |
| 983705       | 989288     | 5583   | OXZ30389.1 | B9N57_04830 | 987500     | 988258   | -1     | SAM-dependent methyltransferase                |
| 983705       | 989288     | 5583   | OXZ30390.1 | B9N57_04835 | 988353     | 988946   | 1      | transcriptional regulator                      |
| 983705       | 989288     | 5583   | OXZ30391.1 | B9N57_04840 | 989097     | 989288   | -1     | hypothetical protein                           |
| 1455800      | 1460804    | 5004   |            | B9N57_07000 | 1455800    | 1456095  | -1     | AraC family transcriptional regulator          |
| 1455800      | 1460804    | 5004   |            | B9N57_07005 | 1456206    | 1456360  | -1     | recombinase                                    |
| 1455800      | 1460804    | 5004   | OXZ29994.1 | B9N57_07010 | 1456581    | 1457231  | -1     | hypothetical protein                           |
| 1455800      | 1460804    | 5004   | OXZ29995.1 | B9N57_07015 | 1457537    | 1458286  | -1     | phosphorylase                                  |
| 1455800      | 1460804    | 5004   | OXZ29996.1 | B9N57_07020 | 1458439    | 1458867  | -1     | hypothetical protein                           |
| 1455800      | 1460804    | 5004   | OXZ29997.1 | B9N57_07025 | 1459220    | 1460248  | -1     | carboxypeptidase                               |
| 1455800      | 1460804    | 5004   |            | B9N57_07030 | 1460566    | 1460804  | 1      | hypothetical protein                           |

|         |         |       |            |             |         |         |                                                 |
|---------|---------|-------|------------|-------------|---------|---------|-------------------------------------------------|
| 1473159 | 1506658 | 33499 | OXZ30007.1 | B9N57_07090 | 1473159 | 1474130 | 1 AraC family transcriptional regulator         |
| 1473159 | 1506658 | 33499 | OXZ30008.1 | B9N57_07095 | 1474325 | 1474681 | 1 plasmid mobilization relaxosome protein MobC  |
| 1473159 | 1506658 | 33499 | OXZ30009.1 | B9N57_07100 | 1474684 | 1476015 | 1 endonuclease                                  |
| 1473159 | 1506658 | 33499 | OXZ30010.1 | B9N57_07105 | 1476084 | 1476743 | -1 DNA-binding protein                          |
| 1473159 | 1506658 | 33499 | OXZ30011.1 | B9N57_07110 | 1476785 | 1485514 | -1 helicase                                     |
| 1473159 | 1506658 | 33499 | OXZ30088.1 | B9N57_07115 | 1485598 | 1487133 | -1 AAA family ATPase                            |
| 1473159 | 1506658 | 33499 | OXZ30089.1 | B9N57_07120 | 1487215 | 1488927 | -1 DNA topoisomerase III                        |
| 1473159 | 1506658 | 33499 | OXZ30012.1 | B9N57_07125 | 1489022 | 1490557 | -1 cell surface protein                         |
| 1473159 | 1506658 | 33499 | OXZ30013.1 | B9N57_07130 | 1490532 | 1490771 | -1 conjugal transfer protein                    |
| 1473159 | 1506658 | 33499 | OXZ30014.1 | B9N57_07135 | 1490783 | 1492915 | -1 CHAP domain-containing protein               |
| 1473159 | 1506658 | 33499 | OXZ30015.1 | B9N57_07140 | 1492919 | 1495348 | -1 conjugal transfer protein TraE               |
| 1473159 | 1506658 | 33499 | OXZ30016.1 | B9N57_07145 | 1495260 | 1495649 | -1 conjugal transfer protein                    |
| 1473159 | 1506658 | 33499 | OXZ30017.1 | B9N57_07150 | 1495653 | 1495916 | -1 conjugal transfer protein                    |
| 1473159 | 1506658 | 33499 | OXZ30018.1 | B9N57_07155 | 1495934 | 1496797 | -1 hypothetical protein                         |
| 1473159 | 1506658 | 33499 | OXZ30019.1 | B9N57_07160 | 1496817 | 1497032 | -1 conjugal transfer protein                    |
| 1473159 | 1506658 | 33499 | OXZ30020.1 | B9N57_07165 | 1497036 | 1497347 | -1 single-stranded DNA-binding protein          |
| 1473159 | 1506658 | 33499 |            | B9N57_07170 | 1497513 | 1498325 | -1 conjugal transfer protein TraG               |
| 1473159 | 1506658 | 33499 | OXZ30021.1 | B9N57_07175 | 1498337 | 1498522 | -1 hypothetical protein                         |
| 1473159 | 1506658 | 33499 | OXZ30022.1 | B9N57_07180 | 1498634 | 1499641 | -1 DNA-binding protein                          |
| 1473159 | 1506658 | 33499 | OXZ30023.1 | B9N57_07185 | 1499663 | 1499986 | -1 hypothetical protein                         |
| 1473159 | 1506658 | 33499 | OXZ30024.1 | B9N57_07190 | 1500160 | 1500912 | -1 replisome organizer                          |
| 1473159 | 1506658 | 33499 | OXZ30025.1 | B9N57_07195 | 1500915 | 1502567 | -1 MobA/MobL protein                            |
| 1473159 | 1506658 | 33499 | OXZ30026.1 | B9N57_07200 | 1502814 | 1503143 | -1 hypothetical protein                         |
| 1473159 | 1506658 | 33499 | OXZ30027.1 | B9N57_07205 | 1503228 | 1503644 | -1 RNA polymerase subunit sigma-70              |
| 1473159 | 1506658 | 33499 | OXZ30028.1 | B9N57_07210 | 1503958 | 1505343 | -1 ABC transporter                              |
| 1473159 | 1506658 | 33499 | OXZ30029.1 | B9N57_07215 | 1505340 | 1506068 | -1 transporter                                  |
| 1473159 | 1506658 | 33499 | OXZ30030.1 | B9N57_07220 | 1506068 | 1506658 | -1 hypothetical protein                         |
| 1535253 | 1542597 | 7344  |            | B9N57_07355 | 1535253 | 1535486 | -1 protein CapI                                 |
| 1535253 | 1542597 | 7344  | OXZ30056.1 | B9N57_07360 | 1535491 | 1536513 | -1 hypothetical protein                         |
| 1535253 | 1542597 | 7344  | OXZ30057.1 | B9N57_07365 | 1536548 | 1538062 | -1 hypothetical protein                         |
| 1535253 | 1542597 | 7344  | OXZ30058.1 | B9N57_07370 | 1538077 | 1539279 | -1 hypothetical protein                         |
| 1535253 | 1542597 | 7344  | OXZ30059.1 | B9N57_07375 | 1539314 | 1540381 | -1 glycosyl transferase family 2                |
| 1535253 | 1542597 | 7344  | OXZ30060.1 | B9N57_07380 | 1540374 | 1541537 | -1 capsule biosynthesis protein                 |
| 1535253 | 1542597 | 7344  | OXZ30061.1 | B9N57_07385 | 1541551 | 1542597 | -1 hypothetical protein                         |
| 1535253 | 1542597 | 7344  | OXZ30062.1 | B9N57_07390 | 1542594 | 1543589 | -1 ornithine cyclodeaminase                     |
| 1638880 | 1660212 | 21332 | OXZ29911.1 | B9N57_07815 | 1637061 | 1638896 | -1 multidrug ABC transporter                    |
| 1638880 | 1660212 | 21332 | OXZ29912.1 | B9N57_07820 | 1638880 | 1640682 | -1 multidrug ABC transporter                    |
| 1638880 | 1660212 | 21332 | OXZ29913.1 | B9N57_07825 | 1640762 | 1641427 | -1 histidine kinase                             |
| 1638880 | 1660212 | 21332 | OXZ29914.1 | B9N57_07830 | 1641435 | 1642130 | -1 DNA-binding response regulator               |
| 1638880 | 1660212 | 21332 | OXZ29915.1 | B9N57_07835 | 1642213 | 1643076 | -1 UTP--glucose-1-phosphate uridylyltransferase |
| 1638880 | 1660212 | 21332 | OXZ29916.1 | B9N57_07840 | 1643801 | 1646386 | -1 ATP-dependent chaperone ClpB                 |
| 1638880 | 1660212 | 21332 | OXZ29917.1 | B9N57_07845 | 1646405 | 1647349 | -1 heat-shock protein                           |
| 1638880 | 1660212 | 21332 | OXZ29918.1 | B9N57_07850 | 1647523 | 1648188 | -1 nitroreductase                               |
| 1638880 | 1660212 | 21332 | OXZ29919.1 | B9N57_07855 | 1648434 | 1649201 | -1 hypothetical protein                         |
| 1638880 | 1660212 | 21332 | OXZ29920.1 | B9N57_07860 | 1650005 | 1650556 | 1 hypothetical protein                          |
| 1638880 | 1660212 | 21332 | OXZ29921.1 | B9N57_07865 | 1650617 | 1650829 | 1 hypothetical protein                          |
| 1638880 | 1660212 | 21332 | OXZ29922.1 | B9N57_07870 | 1650909 | 1652057 | 1 MFS transporter                               |
| 1638880 | 1660212 | 21332 | OXZ29923.1 | B9N57_07875 | 1652136 | 1652633 | -1 hypothetical protein                         |
| 1638880 | 1660212 | 21332 | OXZ29924.1 | B9N57_07880 | 1652669 | 1653142 | -1 peptidase M50                                |
| 1638880 | 1660212 | 21332 | OXZ29925.1 | B9N57_07885 | 1653629 | 1654051 | -1 hypothetical protein                         |
| 1638880 | 1660212 | 21332 | OXZ29926.1 | B9N57_07890 | 1654096 | 1655031 | -1 TIGR01212 family radical SAM protein         |
| 1638880 | 1660212 | 21332 | OXZ29927.1 | B9N57_07895 | 1655024 | 1655464 | -1 peroxiredoxin                                |
| 1638880 | 1660212 | 21332 | OXZ29928.1 | B9N57_07900 | 1655457 | 1656293 | -1 hydrolase                                    |
| 1638880 | 1660212 | 21332 | OXZ29929.1 | B9N57_07905 | 1656283 | 1656594 | -1 DUF1292 domain-containing protein            |
| 1638880 | 1660212 | 21332 | OXZ29930.1 | B9N57_07910 | 1656607 | 1657998 | -1 aminoacyl-histidine dipeptidase              |
| 1638880 | 1660212 | 21332 | OXZ29931.1 | B9N57_07915 | 1658063 | 1659181 | -1 hypothetical protein                         |
| 1638880 | 1660212 | 21332 | OXZ29932.1 | B9N57_07920 | 1659223 | 1660212 | -1 peptide chain release factor 2               |
| 1720515 | 1725038 | 4523  | OXZ29867.1 | B9N57_08165 | 1720515 | 1720637 | 1 hypothetical protein                          |
| 1720515 | 1725038 | 4523  | OXZ29771.1 | B9N57_08170 | 1721099 | 1721893 | -1 protein                                      |
| 1720515 | 1725038 | 4523  | OXZ29772.1 | B9N57_08175 | 1721905 | 1722924 | -1 iron ABC transporter                         |
| 1720515 | 1725038 | 4523  | OXZ29773.1 | B9N57_08180 | 1722926 | 1723972 | -1 iron ABC transporter                         |
| 1720515 | 1725038 | 4523  | OXZ29774.1 | B9N57_08185 | 1723989 | 1725038 | -1 iron ABC transporter permease                |
| 1816636 | 1830054 | 13418 | OXZ29865.1 | B9N57_08675 | 1816636 | 1822018 | 1 peptidase S8                                  |
| 1816636 | 1830054 | 13418 |            | B9N57_08720 | 1823055 | 1823882 | -1 N-acetylmuramoyl-L-alanine amidase           |
| 1816636 | 1830054 | 13418 | OXZ29745.1 | B9N57_08715 | 1824883 | 1825979 | 1 elongation factor Tu                          |
| 1816636 | 1830054 | 13418 | OXZ29746.1 | B9N57_08695 | 1826980 | 1827071 | -1 hypothetical protein                         |
| 1816636 | 1830054 | 13418 | OXZ29747.1 | B9N57_08700 | 1827266 | 1827805 | -1 transposase                                  |
| 1816636 | 1830054 | 13418 | OXZ29748.1 | B9N57_08705 | 1828247 | 1828466 | 1 hypothetical protein                          |
| 1816636 | 1830054 | 13418 | OXZ29740.1 | B9N57_08750 | 1829467 | 1830054 | -1 hypothetical protein                         |



**Table S3D: Predicted genomic islands in the genome of "F. nericia" 09T494**

Shown are genes of genomic islands predicted by IslandViewer4

| Island start | Island end | Length | Gene name  | Locus       | Gene start | Gene end | Strand | Product                                      |
|--------------|------------|--------|------------|-------------|------------|----------|--------|----------------------------------------------|
| 4923         | 16807      | 11884  | OXZ39974.1 | B9N50_00015 | 4923       | 9083     | -1     | phage tail tape measure protein              |
| 4923         | 16807      | 11884  | OXZ39975.1 | B9N50_00020 | 9307       | 9636     | -1     | hypothetical protein                         |
| 4923         | 16807      | 11884  | OXZ39976.1 | B9N50_00025 | 9646       | 10290    | -1     | hypothetical protein                         |
| 4923         | 16807      | 11884  | OXZ39977.1 | B9N50_00030 | 10302      | 10745    | -1     | hypothetical protein                         |
| 4923         | 16807      | 11884  | OXZ39978.1 | B9N50_00035 | 10742      | 11089    | -1     | hypothetical protein                         |
| 4923         | 16807      | 11884  | OXZ39979.1 | B9N50_00040 | 11086      | 11427    | -1     | hypothetical protein                         |
| 4923         | 16807      | 11884  | OXZ39980.1 | B9N50_00045 | 11427      | 11723    | -1     | hypothetical protein                         |
| 4923         | 16807      | 11884  | OXZ39981.1 | B9N50_00050 | 11723      | 12904    | -1     | phage major capsid protein                   |
| 4923         | 16807      | 11884  | OXZ39982.1 | B9N50_00055 | 12907      | 13638    | -1     | hypothetical protein                         |
| 4923         | 16807      | 11884  | OXZ39983.1 | B9N50_00060 | 13711      | 14841    | -1     | hypothetical protein                         |
| 4923         | 16807      | 11884  | OXZ39984.1 | B9N50_00065 | 14829      | 16514    | -1     | hypothetical protein                         |
| 4923         | 16807      | 11884  | OXZ39985.1 | B9N50_00070 | 16511      | 16807    | -1     | hypothetical protein                         |
| 4923         | 16807      | 11884  | OXZ39986.1 | B9N50_00075 | 16794      | 17708    | -1     | hypothetical protein                         |
| 173877       | 193778     | 19901  | OXZ40153.1 | B9N50_00950 | 173877     | 174989   | -1     | hypothetical protein                         |
| 173877       | 193778     | 19901  | OXZ40154.1 | B9N50_00955 | 175269     | 179723   | -1     | hypothetical protein                         |
| 173877       | 193778     | 19901  | OXZ40155.1 | B9N50_00960 | 180154     | 181461   | -1     | hypothetical protein                         |
| 173877       | 193778     | 19901  | OXZ40156.1 | B9N50_00965 | 181485     | 183122   | -1     | hypothetical protein                         |
| 173877       | 193778     | 19901  | OXZ40157.1 | B9N50_00970 | 183132     | 185336   | -1     | hypothetical protein                         |
| 173877       | 193778     | 19901  | OXZ40158.1 | B9N50_00975 | 185254     | 185979   | -1     | hypothetical protein                         |
| 173877       | 193778     | 19901  | OXZ40159.1 | B9N50_00980 | 185960     | 187936   | -1     | hypothetical protein                         |
| 173877       | 193778     | 19901  | OXZ40160.1 | B9N50_00985 | 188155     | 188784   | 1      | hypothetical protein                         |
| 173877       | 193778     | 19901  | OXZ40161.1 | B9N50_00990 | 189230     | 192190   | 1      | restriction endonuclease                     |
| 173877       | 193778     | 19901  | OXZ40162.1 | B9N50_00995 | 192183     | 193778   | 1      | hypothetical protein                         |
| 335804       | 339866     | 4062   | OXZ39656.1 | B9N50_01695 | 335804     | 336445   | -1     | hemolysin III                                |
| 335804       | 339866     | 4062   | OXZ39657.1 | B9N50_01700 | 336598     | 337101   | 1      | acetyltransferase                            |
| 335804       | 339866     | 4062   | OXZ39658.1 | B9N50_01705 | 337101     | 337835   | 1      | hydrolase                                    |
| 335804       | 339866     | 4062   | OXZ39659.1 | B9N50_01710 | 338290     | 338865   | 1      | cell filamentation protein Fic               |
| 335804       | 339866     | 4062   | OXZ39685.1 | B9N50_01715 | 339519     | 339866   | -1     | toxin MazF                                   |
| 1341275      | 1417222    | 75947  | OXZ37862.1 | B9N50_06755 | 1341275    | 1342078  | -1     | DNA-binding protein                          |
| 1341275      | 1417222    | 75947  | OXZ37863.1 | B9N50_06760 | 1342268    | 1343788  | -1     | conjugal transfer protein                    |
| 1341275      | 1417222    | 75947  | OXZ37864.1 | B9N50_06765 | 1343781    | 1345526  | -1     | recombinase                                  |
| 1341275      | 1417222    | 75947  | OXZ37865.1 | B9N50_06770 | 1345519    | 1347237  | -1     | recombinase                                  |
| 1341275      | 1417222    | 75947  | OXZ37866.1 | B9N50_06775 | 1347336    | 1347503  | -1     | aminoacyl-tRNA hydrolase                     |
| 1341275      | 1417222    | 75947  | OXZ37867.1 | B9N50_06780 | 1347921    | 1348331  | -1     | RNA polymerase subunit sigma                 |
| 1341275      | 1417222    | 75947  | OXZ37868.1 | B9N50_06785 | 1348569    | 1349933  | -1     | MATE family efflux transporter               |
| 1341275      | 1417222    | 75947  | OXZ37869.1 | B9N50_06790 | 1350018    | 1351760  | -1     | ABC transporter ATP-binding protein          |
| 1341275      | 1417222    | 75947  | OXZ37870.1 | B9N50_06795 | 1351762    | 1353474  | -1     | ABC transporter ATP-binding protein          |
| 1341275      | 1417222    | 75947  | OXZ37871.1 | B9N50_06800 | 1353478    | 1354893  | -1     | ABC transporter ATP-binding protein          |
| 1341275      | 1417222    | 75947  | OXZ37872.1 | B9N50_06805 | 1354906    | 1355592  | -1     | cobalt transporter                           |
| 1341275      | 1417222    | 75947  | OXZ37873.1 | B9N50_06810 | 1355593    | 1356186  | -1     | hypothetical protein                         |
| 1341275      | 1417222    | 75947  | OXZ37874.1 | B9N50_06815 | 1356358    | 1356969  | -1     | TetR family transcriptional regulator        |
| 1341275      | 1417222    | 75947  | OXZ37875.1 | B9N50_06820 | 1357080    | 1357736  | -1     | hypothetical protein                         |
| 1341275      | 1417222    | 75947  | OXZ37876.1 | B9N50_06825 | 1357760    | 1358518  | -1     | hypothetical protein                         |
| 1341275      | 1417222    | 75947  | OXZ37877.1 | B9N50_06830 | 1358540    | 1359931  | -1     | hypothetical protein                         |
| 1341275      | 1417222    | 75947  | OXZ37878.1 | B9N50_06835 | 1359999    | 1365371  | -1     | non-ribosomal peptide synthetase             |
| 1341275      | 1417222    | 75947  | OXZ37879.1 | B9N50_06840 | 1365391    | 1366440  | -1     | oxidoreductase                               |
| 1341275      | 1417222    | 75947  | OXZ37880.1 | B9N50_06845 | 1366442    | 1367515  | -1     | hypothetical protein                         |
| 1341275      | 1417222    | 75947  | OXZ37881.1 | B9N50_06850 | 1367512    | 1368888  | -1     | hypothetical protein                         |
| 1341275      | 1417222    | 75947  | OXZ37882.1 | B9N50_06855 | 1368913    | 1370370  | -1     | peptide synthetase                           |
| 1341275      | 1417222    | 75947  | OXZ37883.1 | B9N50_06860 | 1370367    | 1371431  | -1     | oxidoreductase                               |
| 1341275      | 1417222    | 75947  | OXZ37884.1 | B9N50_06865 | 1371454    | 1377627  | -1     | non-ribosomal peptide synthetase             |
| 1341275      | 1417222    | 75947  | OXZ37885.1 | B9N50_06870 | 1377644    | 1379233  | -1     | 2,3-dihydroxybenzoate-AMP ligase             |
| 1341275      | 1417222    | 75947  | OXZ37886.1 | B9N50_06875 | 1379252    | 1379926  | -1     | 4'-phosphopantetheinyl transferase           |
| 1341275      | 1417222    | 75947  | OXZ37887.1 | B9N50_06880 | 1379904    | 1380662  | -1     | thioesterase                                 |
| 1341275      | 1417222    | 75947  | OXZ37888.1 | B9N50_06885 | 1380819    | 1381190  | -1     | transcriptional regulator                    |
| 1341275      | 1417222    | 75947  | OXZ37889.1 | B9N50_06890 | 1381661    | 1381801  | -1     | diacylglycerol transferase                   |
| 1341275      | 1417222    | 75947  | OXZ37890.1 | B9N50_06895 | 1381850    | 1382218  | 1      | plasmid mobilization relaxosome protein MobC |
| 1341275      | 1417222    | 75947  | OXZ37891.1 | B9N50_06900 | 1382218    | 1383588  | 1      | endonuclease                                 |
| 1341275      | 1417222    | 75947  | OXZ37892.1 | B9N50_06905 | 1383719    | 1384861  | -1     | single-stranded DNA-binding protein          |
| 1341275      | 1417222    | 75947  | OXZ37893.1 | B9N50_06910 | 1384895    | 1395817  | -1     | conjugal transfer protein                    |
| 1341275      | 1417222    | 75947  | OXZ37894.1 | B9N50_06915 | 1396011    | 1396337  | -1     | terminase large subunit                      |
| 1341275      | 1417222    | 75947  | OXZ37895.1 | B9N50_06920 | 1396678    | 1398384  | -1     | DNA topoisomerase III                        |
| 1341275      | 1417222    | 75947  | OXZ37896.1 | B9N50_06925 | 1398801    | 1399679  | -1     | bacteriocin                                  |
| 1341275      | 1417222    | 75947  | OXZ37897.1 | B9N50_06930 | 1399695    | 1402049  | -1     | copper amine oxidase                         |
| 1341275      | 1417222    | 75947  | OXZ37898.1 | B9N50_06935 | 1402046    | 1402303  | -1     | hypothetical protein                         |
| 1341275      | 1417222    | 75947  | OXZ37899.1 | B9N50_06940 | 1402324    | 1405290  | -1     | hypothetical protein                         |
| 1341275      | 1417222    | 75947  | OXZ37900.1 | B9N50_06945 | 1405300    | 1406265  | -1     | site-specific DNA-methyltransferase          |
| 1341275      | 1417222    | 75947  | OXZ37901.1 | B9N50_06950 | 1406237    | 1408732  | -1     | conjugal transfer protein TraE               |
| 1341275      | 1417222    | 75947  | OXZ37902.1 | B9N50_06955 | 1408729    | 1409067  | -1     | conjugal transfer protein                    |
| 1341275      | 1417222    | 75947  | OXZ37903.1 | B9N50_06960 | 1409067    | 1409324  | -1     | hypothetical protein                         |
| 1341275      | 1417222    | 75947  | OXZ37904.1 | B9N50_06965 | 1409342    | 1410205  | -1     | hypothetical protein                         |
| 1341275      | 1417222    | 75947  | OXZ37905.1 | B9N50_06970 | 1410207    | 1410422  | -1     | conjugal transfer protein                    |
| 1341275      | 1417222    | 75947  | OXZ37906.1 | B9N50_06975 | 1410423    | 1410746  | -1     | single-stranded DNA-binding protein          |
| 1341275      | 1417222    | 75947  | OXZ37907.1 | B9N50_06980 | 1410937    | 1411803  | -1     | CAAX protease                                |
| 1341275      | 1417222    | 75947  | OXZ37908.1 | B9N50_06985 | 1411955    | 1413757  | -1     | conjugal transfer protein TraG               |
| 1341275      | 1417222    | 75947  | OXZ37909.1 | B9N50_06990 | 1413802    | 1414008  | -1     | hypothetical protein                         |
| 1341275      | 1417222    | 75947  | OXZ37910.1 | B9N50_06995 | 1414207    | 1414698  | -1     | hypothetical protein                         |
| 1341275      | 1417222    | 75947  | OXZ38105.1 | B9N50_07000 | 1414713    | 1415570  | -1     | DNA replication protein                      |
| 1341275      | 1417222    | 75947  | OXZ37911.1 | B9N50_07005 | 1415585    | 1416562  | -1     | replication initiator RepA                   |
| 1341275      | 1417222    | 75947  | OXZ37912.1 | B9N50_07010 | 1416649    | 1416939  | -1     | hypothetical protein                         |
| 1341275      | 1417222    | 75947  | OXZ38106.1 | B9N50_07015 | 1416983    | 1417222  | -1     | hypothetical protein                         |
| 1382218      | 1406265    | 24047  | OXZ37891.1 | B9N50_06900 | 1382218    | 1383588  | 1      | endonuclease                                 |
| 1382218      | 1406265    | 24047  | OXZ37892.1 | B9N50_06905 | 1383719    | 1384861  | -1     | single-stranded DNA-binding protein          |

|         |         |                   |             |         |         |                                                  |
|---------|---------|-------------------|-------------|---------|---------|--------------------------------------------------|
| 1382218 | 1406265 | 24047 OXZ37893.1  | B9N50_06910 | 1384895 | 1395817 | -1 conjugal transfer protein                     |
| 1382218 | 1406265 | 24047 OXZ37894.1  | B9N50_06915 | 1396011 | 1396337 | -1 terminase large subunit                       |
| 1382218 | 1406265 | 24047 OXZ37895.1  | B9N50_06920 | 1396678 | 1398384 | -1 DNA topoisomerase III                         |
| 1382218 | 1406265 | 24047 OXZ37896.1  | B9N50_06925 | 1398801 | 1399679 | -1 bacteriocin                                   |
| 1382218 | 1406265 | 24047 OXZ37897.1  | B9N50_06930 | 1399695 | 1402049 | -1 copper amine oxidase                          |
| 1382218 | 1406265 | 24047 OXZ37898.1  | B9N50_06935 | 1402046 | 1402303 | -1 hypothetical protein                          |
| 1382218 | 1406265 | 24047 OXZ37899.1  | B9N50_06940 | 1402324 | 1405290 | -1 hypothetical protein                          |
| 1382218 | 1406265 | 24047 OXZ37900.1  | B9N50_06945 | 1405300 | 1406265 | -1 site-specific DNA-methyltransferase           |
| 1382218 | 1406265 | 24047 OXZ37901.1  | B9N50_06950 | 1406237 | 1408732 | -1 conjugal transfer protein TraE                |
| 1408729 | 1416562 | 7833 OXZ37901.1   | B9N50_06950 | 1406237 | 1408732 | -1 conjugal transfer protein TraE                |
| 1408729 | 1416562 | 7833 OXZ37902.1   | B9N50_06955 | 1408729 | 1409067 | -1 conjugal transfer protein                     |
| 1408729 | 1416562 | 7833 OXZ37903.1   | B9N50_06960 | 1409067 | 1409324 | -1 hypothetical protein                          |
| 1408729 | 1416562 | 7833 OXZ37904.1   | B9N50_06965 | 1409342 | 1410205 | -1 hypothetical protein                          |
| 1408729 | 1416562 | 7833 OXZ37905.1   | B9N50_06970 | 1410207 | 1410422 | -1 conjugal transfer protein                     |
| 1408729 | 1416562 | 7833 OXZ37906.1   | B9N50_06975 | 1410423 | 1410746 | -1 single-stranded DNA-binding protein           |
| 1408729 | 1416562 | 7833 OXZ37907.1   | B9N50_06980 | 1410937 | 1411803 | -1 CAAX protease                                 |
| 1408729 | 1416562 | 7833 OXZ37908.1   | B9N50_06985 | 1411955 | 1413757 | -1 conjugal transfer protein TraG                |
| 1408729 | 1416562 | 7833 OXZ37909.1   | B9N50_06990 | 1413802 | 1414008 | -1 hypothetical protein                          |
| 1408729 | 1416562 | 7833 OXZ37910.1   | B9N50_06995 | 1414207 | 1414698 | -1 hypothetical protein                          |
| 1408729 | 1416562 | 7833 OXZ38105.1   | B9N50_07000 | 1414713 | 1415570 | -1 DNA replication protein                       |
| 1408729 | 1416562 | 7833 OXZ37911.1   | B9N50_07005 | 1415585 | 1416562 | -1 replication initiator RepA                    |
| 1551711 | 1651998 | 100287 OXZ38035.1 | B9N50_07665 | 1551711 | 1553102 | -1 ABC transporter                               |
| 1551711 | 1651998 | 100287 OXZ38036.1 | B9N50_07670 | 1553099 | 1553827 | -1 transporter                                   |
| 1551711 | 1651998 | 100287 OXZ38037.1 | B9N50_07675 | 1553827 | 1554417 | -1 hypothetical protein                          |
| 1551711 | 1651998 | 100287 OXZ38038.1 | B9N50_07680 | 1554448 | 1556169 | -1 ABC transporter permease                      |
| 1551711 | 1651998 | 100287 OXZ38039.1 | B9N50_07685 | 1556169 | 1557935 | -1 ABC transporter permease                      |
| 1551711 | 1651998 | 100287 OXZ38040.1 | B9N50_07690 | 1558046 | 1558660 | -1 TetR family transcriptional regulator         |
| 1551711 | 1651998 | 100287 OXZ38041.1 | B9N50_07695 | 1558956 | 1559576 | -1 phosphomethylpyrimidine kinase                |
| 1551711 | 1651998 | 100287            | B9N50_07700 | 1559626 | 1560121 | -1 terminase                                     |
| 1551711 | 1651998 | 100287            | B9N50_07705 | 1560312 | 1561474 | 1 IS110 family transposase                       |
| 1551711 | 1651998 | 100287 OXZ38042.1 | B9N50_07710 | 1562235 | 1563971 | -1 multidrug ABC transporter ATP-binding protein |
| 1551711 | 1651998 | 100287 OXZ38043.1 | B9N50_07715 | 1563971 | 1565686 | -1 ABC transporter ATP-binding protein           |
| 1551711 | 1651998 | 100287 OXZ38044.1 | B9N50_07720 | 1565690 | 1567171 | -1 ABC transporter                               |
| 1551711 | 1651998 | 100287 OXZ38111.1 | B9N50_07725 | 1567156 | 1567836 | -1 ABC transporter permease                      |
| 1551711 | 1651998 | 100287 OXZ38045.1 | B9N50_07730 | 1567851 | 1568480 | -1 hypothetical protein                          |
| 1551711 | 1651998 | 100287 OXZ38046.1 | B9N50_07735 | 1568470 | 1569051 | -1 TetR family transcriptional regulator         |
| 1551711 | 1651998 | 100287 OXZ38047.1 | B9N50_07740 | 1569738 | 1570094 | 1 plasmid mobilization relaxosome protein MobC   |
| 1551711 | 1651998 | 100287 OXZ38048.1 | B9N50_07745 | 1570283 | 1570792 | -1 hypothetical protein                          |
| 1551711 | 1651998 | 100287            | B9N50_07750 | 1570932 | 1571213 | -1 hypothetical protein                          |
| 1551711 | 1651998 | 100287 OXZ38049.1 | B9N50_07755 | 1571216 | 1571587 | -1 transcriptional regulator                     |
| 1551711 | 1651998 | 100287 OXZ38050.1 | B9N50_07760 | 1571877 | 1572338 | -1 flavodoxin                                    |
| 1551711 | 1651998 | 100287 OXZ38112.1 | B9N50_07765 | 1572742 | 1573860 | -1 alpha/beta hydrolase                          |
| 1551711 | 1651998 | 100287 OXZ38051.1 | B9N50_07770 | 1573866 | 1574123 | -1 AbrB family transcriptional regulator         |
| 1551711 | 1651998 | 100287 OXZ38052.1 | B9N50_07775 | 1574772 | 1575140 | -1 EXLDI protein                                 |
| 1551711 | 1651998 | 100287            | B9N50_07780 | 1575327 | 1575736 | -1 recombinase family protein                    |
| 1551711 | 1651998 | 100287 OXZ38113.1 | B9N50_07785 | 1575991 | 1576698 | -1 hypothetical protein                          |
| 1551711 | 1651998 | 100287 OXZ38053.1 | B9N50_07790 | 1577036 | 1577653 | -1 hypothetical protein                          |
| 1551711 | 1651998 | 100287            | B9N50_07795 | 1577792 | 1578732 | -1 recombinase family protein                    |
| 1551711 | 1651998 | 100287 OXZ38114.1 | B9N50_07800 | 1579119 | 1579574 | -1 hypothetical protein                          |
| 1551711 | 1651998 | 100287            | B9N50_07805 | 1579830 | 1580329 | -1 hypothetical protein                          |
| 1551711 | 1651998 | 100287 OXZ38054.1 | B9N50_07810 | 1580757 | 1582511 | -1 recombinase family protein                    |
| 1551711 | 1651998 | 100287 OXZ38055.1 | B9N50_07815 | 1583242 | 1583652 | -1 RNA polymerase subunit sigma                  |
| 1551711 | 1651998 | 100287 OXZ38115.1 | B9N50_07820 | 1583922 | 1584329 | -1 hypothetical protein                          |
| 1551711 | 1651998 | 100287 OXZ38056.1 | B9N50_07825 | 1584632 | 1585033 | 1 transcriptional regulator                      |
| 1551711 | 1651998 | 100287 OXZ38057.1 | B9N50_07830 | 1585042 | 1585590 | 1 toxin                                          |
| 1551711 | 1651998 | 100287 OXZ38058.1 | B9N50_07835 | 1585599 | 1586081 | 1 hypothetical protein                           |
| 1551711 | 1651998 | 100287 OXZ38059.1 | B9N50_07840 | 1586074 | 1587147 | 1 cell filamentation protein Fic                 |
| 1551711 | 1651998 | 100287 OXZ38060.1 | B9N50_07845 | 1587318 | 1587674 | 1 plasmid mobilization relaxosome protein MobC   |
| 1551711 | 1651998 | 100287 OXZ38061.1 | B9N50_07850 | 1587676 | 1589007 | 1 endonuclease                                   |
| 1551711 | 1651998 | 100287            | B9N50_07855 | 1589224 | 1590455 | -1 IS256 family transposase                      |
| 1551711 | 1651998 | 100287            | B9N50_07860 | 1590580 | 1591127 | -1 hypothetical protein                          |
| 1551711 | 1651998 | 100287 OXZ38062.1 | B9N50_07865 | 1591257 | 1591448 | -1 hypothetical protein                          |
| 1551711 | 1651998 | 100287 OXZ38063.1 | B9N50_07870 | 1591634 | 1592872 | -1 hypothetical protein                          |
| 1551711 | 1651998 | 100287 OXZ38064.1 | B9N50_07875 | 1592885 | 1593934 | -1 hypothetical protein                          |
| 1551711 | 1651998 | 100287 OXZ38065.1 | B9N50_07880 | 1593943 | 1594962 | -1 hypothetical protein                          |
| 1551711 | 1651998 | 100287 OXZ38066.1 | B9N50_07885 | 1594946 | 1596610 | -1 hypothetical protein                          |
| 1551711 | 1651998 | 100287 OXZ38067.1 | B9N50_07890 | 1596603 | 1597754 | -1 hypothetical protein                          |
| 1551711 | 1651998 | 100287 OXZ38068.1 | B9N50_07895 | 1597757 | 1600087 | -1 ABC transporter permease                      |
| 1551711 | 1651998 | 100287 OXZ38069.1 | B9N50_07900 | 1600087 | 1600767 | -1 ABC transporter ATP-binding protein           |
| 1551711 | 1651998 | 100287 OXZ38070.1 | B9N50_07905 | 1601124 | 1601330 | 1 hypothetical protein                           |
| 1551711 | 1651998 | 100287 OXZ38071.1 | B9N50_07910 | 1601736 | 1602029 | -1 hypothetical protein                          |
| 1551711 | 1651998 | 100287 OXZ38072.1 | B9N50_07915 | 1602246 | 1602566 | -1 hypothetical protein                          |
| 1551711 | 1651998 | 100287 OXZ38073.1 | B9N50_07920 | 1602697 | 1603128 | -1 hypothetical protein                          |
| 1551711 | 1651998 | 100287 OXZ38074.1 | B9N50_07925 | 1603141 | 1603407 | -1 hypothetical protein                          |
| 1551711 | 1651998 | 100287 OXZ38075.1 | B9N50_07930 | 1603401 | 1603970 | -1 hypothetical protein                          |
| 1551711 | 1651998 | 100287            | B9N50_07935 | 1604957 | 1605466 | 1 transposase                                    |
| 1551711 | 1651998 | 100287 OXZ38076.1 | B9N50_07940 | 1605602 | 1605955 | 1 hypothetical protein                           |
| 1551711 | 1651998 | 100287 OXZ38077.1 | B9N50_07945 | 1606029 | 1606667 | -1 hypothetical protein                          |
| 1551711 | 1651998 | 100287 OXZ38078.1 | B9N50_07950 | 1606664 | 1607827 | -1 hypothetical protein                          |
| 1551711 | 1651998 | 100287 OXZ38079.1 | B9N50_07955 | 1607838 | 1608710 | -1 hypothetical protein                          |
| 1551711 | 1651998 | 100287 OXZ38080.1 | B9N50_07960 | 1608697 | 1610373 | -1 hypothetical protein                          |
| 1551711 | 1651998 | 100287 OXZ38081.1 | B9N50_07965 | 1610357 | 1611238 | -1 hypothetical protein                          |
| 1551711 | 1651998 | 100287 OXZ38082.1 | B9N50_07970 | 1611328 | 1611522 | -1 hypothetical protein                          |
| 1551711 | 1651998 | 100287 OXZ38083.1 | B9N50_07975 | 1611561 | 1612568 | -1 hypothetical protein                          |
| 1551711 | 1651998 | 100287 OXZ38084.1 | B9N50_07980 | 1612572 | 1613831 | -1 hypothetical protein                          |
| 1551711 | 1651998 | 100287 OXZ38085.1 | B9N50_07985 | 1614036 | 1615673 | -1 ABC transporter permease                      |

|         |         |                   |             |         |         |                                         |
|---------|---------|-------------------|-------------|---------|---------|-----------------------------------------|
|         |         |                   |             |         |         | CXXX repeat peptide modification system |
| 1551711 | 1651998 | 100287 OXZ38086.1 | B9N50_07990 | 1615666 | 1615932 | -1 protein                              |
| 1551711 | 1651998 | 100287 OXZ38087.1 | B9N50_07995 | 1615934 | 1618120 | -1 radical SAM protein                  |
| 1551711 | 1651998 | 100287 OXZ38088.1 | B9N50_08000 | 1618402 | 1619007 | -1 DNA-binding response regulator       |
| 1551711 | 1651998 | 100287 OXZ38089.1 | B9N50_08005 | 1618979 | 1620526 | -1 hypothetical protein                 |
| 1551711 | 1651998 | 100287 OXZ38090.1 | B9N50_08010 | 1620826 | 1621482 | -1 DNA-binding protein                  |
| 1551711 | 1651998 | 100287 OXZ38091.1 | B9N50_08015 | 1621526 | 1629169 | -1 DNA helicase                         |
| 1551711 | 1651998 | 100287 OXZ38092.1 | B9N50_08020 | 1629156 | 1630121 | -1 DNA (cytosine-5-)-methyltransferase  |
| 1551711 | 1651998 | 100287 OXZ38093.1 | B9N50_08025 | 1630114 | 1631835 | -1 DNA topoisomerase III                |
| 1551711 | 1651998 | 100287 OXZ38094.1 | B9N50_08030 | 1631928 | 1632911 | -1 hypothetical protein                 |
| 1551711 | 1651998 | 100287 OXZ38095.1 | B9N50_08035 | 1632904 | 1633515 | -1 hypothetical protein                 |
| 1551711 | 1651998 | 100287 OXZ38096.1 | B9N50_08040 | 1633589 | 1634446 | -1 bacteriocin                          |
| 1551711 | 1651998 | 100287 OXZ38097.1 | B9N50_08045 | 1634461 | 1635746 | -1 copper amine oxidase                 |
| 1551711 | 1651998 | 100287 OXZ38297.1 | B9N50_05400 | 1636747 | 1637171 | -1 copper amine oxidase                 |
| 1551711 | 1651998 | 100287 OXZ38298.1 | B9N50_05405 | 1637158 | 1637397 | -1 hypothetical protein                 |
| 1551711 | 1651998 | 100287 OXZ38299.1 | B9N50_05410 | 1637412 | 1639991 | -1 hypothetical protein                 |
| 1551711 | 1651998 | 100287 OXZ38300.1 | B9N50_05415 | 1639999 | 1642422 | -1 conjugal transfer protein TraE       |
| 1551711 | 1651998 | 100287 OXZ38301.1 | B9N50_05420 | 1642313 | 1642723 | -1 conjugal transfer protein            |
| 1551711 | 1651998 | 100287 OXZ38302.1 | B9N50_05425 | 1642725 | 1643015 | -1 hypothetical protein                 |
| 1551711 | 1651998 | 100287 OXZ38303.1 | B9N50_05430 | 1643025 | 1643888 | -1 hypothetical protein                 |
| 1551711 | 1651998 | 100287 OXZ38304.1 | B9N50_05435 | 1643899 | 1644114 | -1 conjugal transfer protein            |
| 1551711 | 1651998 | 100287 OXZ38305.1 | B9N50_05440 | 1644116 | 1644427 | -1 single-stranded DNA-binding protein  |
| 1551711 | 1651998 | 100287 OXZ38306.1 | B9N50_05445 | 1644616 | 1645071 | -1 hypothetical protein                 |
|         |         |                   |             |         |         | bacteriocin ABC transporter ATP-binding |
| 1551711 | 1651998 | 100287 OXZ38307.1 | B9N50_05450 | 1645068 | 1645676 | -1 protein                              |
| 1551711 | 1651998 | 100287 OXZ38308.1 | B9N50_05455 | 1645673 | 1647649 | -1 hypothetical protein                 |
| 1551711 | 1651998 | 100287 OXZ38309.1 | B9N50_05460 | 1647814 | 1648152 | -1 hypothetical protein                 |
| 1551711 | 1651998 | 100287            | B9N50_05465 | 1648403 | 1648661 | -1 conjugal transfer protein TraG       |
| 1551711 | 1651998 | 100287 OXZ38310.1 | B9N50_05470 | 1648699 | 1648974 | -1 hypothetical protein                 |
| 1551711 | 1651998 | 100287 OXZ38311.1 | B9N50_05475 | 1648993 | 1650789 | -1 conjugal transfer protein TraG       |
| 1551711 | 1651998 | 100287 OXZ38312.1 | B9N50_05480 | 1650782 | 1651516 | -1 phage antirepressor Ant              |
| 1551711 | 1651998 | 100287 OXZ38313.1 | B9N50_05485 | 1651513 | 1651998 | -1 conjugal transfer protein            |
| 1551711 | 1651998 | 100287 OXZ38314.1 | B9N50_05490 | 1651991 | 1652818 | -1 nucleoside triphosphate hydrolase    |
| 1591257 | 1596610 | 5353 OXZ38062.1   | B9N50_07865 | 1591257 | 1591448 | -1 hypothetical protein                 |
| 1591257 | 1596610 | 5353 OXZ38063.1   | B9N50_07870 | 1591634 | 1592872 | -1 hypothetical protein                 |
| 1591257 | 1596610 | 5353 OXZ38064.1   | B9N50_07875 | 1592885 | 1593934 | -1 hypothetical protein                 |
| 1591257 | 1596610 | 5353 OXZ38065.1   | B9N50_07880 | 1593943 | 1594962 | -1 hypothetical protein                 |
| 1591257 | 1596610 | 5353 OXZ38066.1   | B9N50_07885 | 1594946 | 1596610 | -1 hypothetical protein                 |
| 1591257 | 1596610 | 5353 OXZ38067.1   | B9N50_07890 | 1596603 | 1597754 | -1 hypothetical protein                 |
| 1611561 | 1619007 | 7446 OXZ38083.1   | B9N50_07975 | 1611561 | 1612568 | -1 hypothetical protein                 |
| 1611561 | 1619007 | 7446 OXZ38084.1   | B9N50_07980 | 1612572 | 1613831 | -1 hypothetical protein                 |
| 1611561 | 1619007 | 7446 OXZ38085.1   | B9N50_07985 | 1614036 | 1615673 | -1 ABC transporter permease             |
|         |         |                   |             |         |         | CXXX repeat peptide modification system |
| 1611561 | 1619007 | 7446 OXZ38086.1   | B9N50_07990 | 1615666 | 1615932 | -1 protein                              |
| 1611561 | 1619007 | 7446 OXZ38087.1   | B9N50_07995 | 1615934 | 1618120 | -1 radical SAM protein                  |
| 1611561 | 1619007 | 7446 OXZ38088.1   | B9N50_08000 | 1618402 | 1619007 | -1 DNA-binding response regulator       |
| 1611561 | 1619007 | 7446 OXZ38089.1   | B9N50_08005 | 1618979 | 1620526 | -1 hypothetical protein                 |
| 1644116 | 1651998 | 7882 OXZ38305.1   | B9N50_05440 | 1644116 | 1644427 | -1 single-stranded DNA-binding protein  |
| 1644116 | 1651998 | 7882 OXZ38306.1   | B9N50_05445 | 1644616 | 1645071 | -1 hypothetical protein                 |
|         |         |                   |             |         |         | bacteriocin ABC transporter ATP-binding |
| 1644116 | 1651998 | 7882 OXZ38307.1   | B9N50_05450 | 1645068 | 1645676 | -1 protein                              |
| 1644116 | 1651998 | 7882 OXZ38308.1   | B9N50_05455 | 1645673 | 1647649 | -1 hypothetical protein                 |
| 1644116 | 1651998 | 7882 OXZ38309.1   | B9N50_05460 | 1647814 | 1648152 | -1 hypothetical protein                 |
| 1644116 | 1651998 | 7882              | B9N50_05465 | 1648403 | 1648661 | -1 conjugal transfer protein TraG       |
| 1644116 | 1651998 | 7882 OXZ38310.1   | B9N50_05470 | 1648699 | 1648974 | -1 hypothetical protein                 |
| 1644116 | 1651998 | 7882 OXZ38311.1   | B9N50_05475 | 1648993 | 1650789 | -1 conjugal transfer protein TraG       |
| 1644116 | 1651998 | 7882 OXZ38312.1   | B9N50_05480 | 1650782 | 1651516 | -1 phage antirepressor Ant              |
| 1644116 | 1651998 | 7882 OXZ38313.1   | B9N50_05485 | 1651513 | 1651998 | -1 conjugal transfer protein            |
| 1644116 | 1651998 | 7882 OXZ38314.1   | B9N50_05490 | 1651991 | 1652818 | -1 nucleoside triphosphate hydrolase    |
| 1771690 | 1776504 | 4814 OXZ37464.1   | B9N50_08530 | 1770150 | 1771697 | -1 hypothetical protein                 |
| 1771690 | 1776504 | 4814 OXZ37465.1   | B9N50_08535 | 1771690 | 1772916 | -1 hypothetical protein                 |
| 1771690 | 1776504 | 4814 OXZ37466.1   | B9N50_08540 | 1772947 | 1774119 | -1 hypothetical protein                 |
| 1771690 | 1776504 | 4814 OXZ37467.1   | B9N50_08545 | 1774194 | 1775369 | -1 hypothetical protein                 |
| 1771690 | 1776504 | 4814 OXZ37468.1   | B9N50_08550 | 1775362 | 1776504 | -1 hypothetical protein                 |



**Table S3E: Predicted genomic islands in the genome of "F. nericia" 12T272**

Shown are genes of genomic islands predicted by IslandViewer4

| Island start | Island end | Length | Gene name  | Locus       | Gene start | Gene end | Strand | Product                                                            |
|--------------|------------|--------|------------|-------------|------------|----------|--------|--------------------------------------------------------------------|
| 34527        | 44047      | 9520   | OXZ36018.1 | B9N53_00160 | 34527      | 35396    | 1      | hypothetical protein                                               |
| 34527        | 44047      | 9520   | OXZ36019.1 | B9N53_00165 | 35383      | 37371    | 1      | exopolyphosphatase                                                 |
| 34527        | 44047      | 9520   | OXZ36020.1 | B9N53_00170 | 37352      | 37798    | 1      | 50S ribosomal protein L9                                           |
| 34527        | 44047      | 9520   | OXZ36021.1 | B9N53_00175 | 37832      | 39169    | 1      | replicative DNA helicase                                           |
| 34527        | 44047      | 9520   | OXZ36022.1 | B9N53_00180 | 39166      | 39729    | 1      | GNAT family N-acetyltransferase                                    |
| 34527        | 44047      | 9520   | OXZ36023.1 | B9N53_00185 | 39734      | 40492    | 1      | DNA replication protein                                            |
| 34527        | 44047      | 9520   | OXZ36024.1 | B9N53_00190 | 40495      | 41472    | 1      | DNA replication protein DnaC                                       |
| 34527        | 44047      | 9520   | OXZ36025.1 | B9N53_00195 | 41469      | 42113    | 1      | NAD(P)H-hydrate epimerase                                          |
| 34527        | 44047      | 9520   | OXZ36026.1 | B9N53_00200 | 42835      | 43377    | 1      | ECF transporter S component                                        |
| 34527        | 44047      | 9520   | OXZ36027.1 | B9N53_00205 | 43361      | 44047    | 1      | radical SAM protein                                                |
| 604530       | 616700     | 12170  | OXZ35396.1 | B9N53_03100 | 604530     | 605510   | -1     | recombinase XerC                                                   |
| 604530       | 616700     | 12170  | OXZ35397.1 | B9N53_03105 | 605613     | 606788   | -1     | aspartate aminotransferase                                         |
| 604530       | 616700     | 12170  | OXZ35398.1 | B9N53_03110 | 606769     | 607596   | -1     | metal-dependent phosphoesterase                                    |
| 604530       | 616700     | 12170  | OXZ35399.1 | B9N53_03115 | 607665     | 609206   | -1     | ribonuclease Y                                                     |
| 604530       | 616700     | 12170  | OXZ35400.1 | B9N53_03120 | 609325     | 609987   | -1     | chromosome partitioning protein ParA                               |
| 604530       | 616700     | 12170  | OXZ35401.1 | B9N53_03125 | 609974     | 610213   | -1     | hypothetical protein                                               |
| 604530       | 616700     | 12170  | OXZ35402.1 | B9N53_03130 | 610213     | 611796   | -1     | exonuclease SbcC                                                   |
| 604530       | 616700     | 12170  | OXZ35420.1 | B9N53_03135 | 611796     | 612746   | -1     | phosphoesterase                                                    |
| 604530       | 616700     | 12170  | OXZ35403.1 | B9N53_03140 | 612777     | 613868   | -1     | recombinase RecA                                                   |
| 604530       | 616700     | 12170  | OXZ35404.1 | B9N53_03145 | 613937     | 614473   | -1     | CDP-diacylglycerol--glycerol-3-phosphate 3-phosphatidyltransferase |
| 604530       | 616700     | 12170  | OXZ35405.1 | B9N53_03150 | 614475     | 616700   | -1     | cell division protein FtsK                                         |
| 1277699      | 1282020    | 4321   |            | B9N53_06220 | 1277699    | 1278187  | -1     | terminase                                                          |
| 1277699      | 1282020    | 4321   |            | B9N53_06225 | 1278379    | 1279523  | 1      | IS110 family transposase                                           |
| 1277699      | 1282020    | 4321   | OXZ34114.1 | B9N53_06230 | 1280284    | 1282020  | -1     | multidrug ABC transporter ATP-binding protein                      |
| 1294955      | 1300767    | 5812   | OXZ34125.1 | B9N53_06305 | 1293840    | 1294958  | -1     | alpha/beta hydrolase                                               |
| 1294955      | 1300767    | 5812   | OXZ34126.1 | B9N53_06310 | 1294955    | 1295212  | -1     | AbrB family transcriptional regulator                              |
| 1294955      | 1300767    | 5812   | OXZ34127.1 | B9N53_06315 | 1295862    | 1296230  | -1     | EXLDI protein                                                      |
| 1294955      | 1300767    | 5812   |            | B9N53_06320 | 1296417    | 1296826  | -1     | recombinase family protein                                         |
| 1294955      | 1300767    | 5812   | OXZ34201.1 | B9N53_06325 | 1297080    | 1297787  | -1     | hypothetical protein                                               |
| 1294955      | 1300767    | 5812   | OXZ34128.1 | B9N53_06330 | 1298153    | 1298761  | -1     | hypothetical protein                                               |
| 1294955      | 1300767    | 5812   |            | B9N53_06335 | 1298777    | 1299649  | -1     | recombinase family protein                                         |
| 1294955      | 1300767    | 5812   | OXZ34129.1 | B9N53_06340 | 1300150    | 1300767  | -1     | hypothetical protein                                               |
| 1359973      | 1364035    | 4062   | OXZ34202.1 | B9N53_06615 | 1359973    | 1360320  | 1      | toxin MazF                                                         |
| 1359973      | 1364035    | 4062   | OXZ34181.1 | B9N53_06620 | 1360974    | 1361549  | -1     | cell filamentation protein Fic                                     |
| 1359973      | 1364035    | 4062   | OXZ34182.1 | B9N53_06625 | 1362004    | 1362738  | -1     | hydrolase                                                          |
| 1359973      | 1364035    | 4062   | OXZ34183.1 | B9N53_06630 | 1362738    | 1363241  | -1     | acetyltransferase                                                  |
| 1359973      | 1364035    | 4062   | OXZ34184.1 | B9N53_06635 | 1363394    | 1364035  | 1      | hemolysin III                                                      |
| 1496002      | 1504337    | 8335   | OXZ33200.1 | B9N53_07260 | 1496002    | 1496184  | -1     | hypothetical protein                                               |
| 1496002      | 1504337    | 8335   | OXZ33201.1 | B9N53_07265 | 1496240    | 1497262  | -1     | hypothetical protein                                               |
| 1496002      | 1504337    | 8335   | OXZ33202.1 | B9N53_07270 | 1497300    | 1498811  | -1     | hypothetical protein                                               |
| 1496002      | 1504337    | 8335   | OXZ33203.1 | B9N53_07275 | 1498825    | 1500027  | -1     | hypothetical protein                                               |
| 1496002      | 1504337    | 8335   | OXZ33204.1 | B9N53_07280 | 1500062    | 1501129  | -1     | glycosyl transferase family 2                                      |
| 1496002      | 1504337    | 8335   | OXZ33205.1 | B9N53_07285 | 1501122    | 1502285  | -1     | capsule biosynthesis protein                                       |
| 1496002      | 1504337    | 8335   | OXZ33206.1 | B9N53_07290 | 1502299    | 1503345  | -1     | hypothetical protein                                               |
| 1496002      | 1504337    | 8335   | OXZ33207.1 | B9N53_07295 | 1503342    | 1504337  | -1     | hypothetical protein                                               |
| 1736754      | 1830377    | 93623  | OXZ32959.1 | B9N53_08375 | 1736754    | 1737218  | -1     | hypothetical protein                                               |
| 1736754      | 1830377    | 93623  | OXZ32960.1 | B9N53_08380 | 1737303    | 1738106  | -1     | DNA-binding protein                                                |
| 1736754      | 1830377    | 93623  | OXZ32961.1 | B9N53_08385 | 1738296    | 1739816  | -1     | conjugal transfer protein                                          |
| 1736754      | 1830377    | 93623  | OXZ32962.1 | B9N53_08390 | 1739809    | 1741551  | -1     | recombinase                                                        |
| 1736754      | 1830377    | 93623  | OXZ32963.1 | B9N53_08395 | 1741544    | 1743262  | -1     | recombinase                                                        |
| 1736754      | 1830377    | 93623  | OXZ32964.1 | B9N53_08400 | 1743361    | 1743528  | -1     | aminoacyl-tRNA hydrolase                                           |
| 1736754      | 1830377    | 93623  | OXZ32965.1 | B9N53_08405 | 1743945    | 1744355  | -1     | RNA polymerase subunit sigma                                       |
| 1736754      | 1830377    | 93623  | OXZ32966.1 | B9N53_08410 | 1744638    | 1746374  | -1     | multidrug ABC transporter ATP-binding protein                      |
| 1736754      | 1830377    | 93623  | OXZ32967.1 | B9N53_08415 | 1746367    | 1748088  | -1     | ABC transporter ATP-binding protein                                |
| 1736754      | 1830377    | 93623  | OXZ32968.1 | B9N53_08420 | 1748126    | 1749478  | -1     | MATE family efflux transporter                                     |
| 1736754      | 1830377    | 93623  | OXZ32969.1 | B9N53_08425 | 1749491    | 1750939  | -1     | ABC transporter                                                    |
| 1736754      | 1830377    | 93623  | OXZ32970.1 | B9N53_08430 | 1750936    | 1751616  | -1     | ABC transporter permease                                           |
| 1736754      | 1830377    | 93623  | OXZ32971.1 | B9N53_08435 | 1751616    | 1752194  | -1     | hypothetical protein                                               |
| 1736754      | 1830377    | 93623  | OXZ32972.1 | B9N53_08440 | 1752246    | 1752812  | -1     | TetR family transcriptional regulator                              |
| 1736754      | 1830377    | 93623  | OXZ32973.1 | B9N53_08445 | 1752898    | 1753650  | -1     | hypothetical protein                                               |
| 1736754      | 1830377    | 93623  | OXZ32974.1 | B9N53_08450 | 1753651    | 1754706  | -1     | saccharopine dehydrogenase                                         |
| 1736754      | 1830377    | 93623  | OXZ32975.1 | B9N53_08455 | 1754796    | 1760315  | -1     | non-ribosomal peptide synthetase                                   |
| 1736754      | 1830377    | 93623  | OXZ32976.1 | B9N53_08460 | 1760336    | 1762276  | -1     | condensation protein                                               |
| 1736754      | 1830377    | 93623  | OXZ32977.1 | B9N53_08465 | 1762289    | 1763875  | -1     | 2,3-dihydroxybenzoate-AMP ligase                                   |
| 1736754      | 1830377    | 93623  | OXZ32978.1 | B9N53_08470 | 1763875    | 1764567  | -1     | 4-phosphopantetheinyl transferase                                  |
| 1736754      | 1830377    | 93623  | OXZ32979.1 | B9N53_08475 | 1764557    | 1765309  | -1     | thioesterase                                                       |
| 1736754      | 1830377    | 93623  | OXZ32980.1 | B9N53_08480 | 1765470    | 1765841  | -1     | transcriptional regulator                                          |
| 1736754      | 1830377    | 93623  | OXZ32981.1 | B9N53_08485 | 1766366    | 1766734  | 1      | plasmid mobilization relaxosome protein MobC                       |
| 1736754      | 1830377    | 93623  | OXZ32982.1 | B9N53_08490 | 1766734    | 1768104  | 1      | endonuclease                                                       |
| 1736754      | 1830377    | 93623  |            | B9N53_08495 | 1768445    | 1769660  | -1     | IS256 family transposase                                           |
| 1736754      | 1830377    | 93623  | OXZ32983.1 | B9N53_08500 | 1769853    | 1770317  | -1     | hypothetical protein                                               |
| 1736754      | 1830377    | 93623  | OXZ32984.1 | B9N53_08505 | 1770441    | 1772564  | -1     | bacteriocin/lantibiotic ABC transporter ATP-binding protein        |
| 1736754      | 1830377    | 93623  | OXZ32985.1 | B9N53_08510 | 1772654    | 1775869  | -1     | type 2 lantipeptide synthetase LanM                                |
| 1736754      | 1830377    | 93623  | OXZ32986.1 | B9N53_08515 | 1775957    | 1776184  | -1     | type 2 lantibiotic, mersacidin/lichenicidin family protein         |
| 1736754      | 1830377    | 93623  | OXZ32987.1 | B9N53_08520 | 1776259    | 1776981  | -1     | ABC transporter permease                                           |
| 1736754      | 1830377    | 93623  | OXZ32988.1 | B9N53_08525 | 1777001    | 1777735  | -1     | hypothetical protein                                               |
| 1736754      | 1830377    | 93623  | OXZ32989.1 | B9N53_08530 | 1777728    | 1778645  | -1     | ABC transporter ATP-binding protein                                |
| 1736754      | 1830377    | 93623  |            | B9N53_08535 | 1778911    | 1779289  | -1     | hypothetical protein                                               |

|         |         |                  |             |         |         |                                                                                              |
|---------|---------|------------------|-------------|---------|---------|----------------------------------------------------------------------------------------------|
| 1736754 | 1830377 | 93623 OXZ32990.1 | B9N53_08540 | 1779302 | 1779568 | -1 hypothetical protein                                                                      |
| 1736754 | 1830377 | 93623 OXZ32991.1 | B9N53_08545 | 1779562 | 1780131 | -1 hypothetical protein                                                                      |
| 1736754 | 1830377 | 93623            | B9N53_08550 | 1780470 | 1780774 | 1 relaxase                                                                                   |
| 1736754 | 1830377 | 93623 OXZ32992.1 | B9N53_08555 | 1780793 | 1781224 | -1 hypothetical protein                                                                      |
| 1736754 | 1830377 | 93623            | B9N53_08560 | 1781178 | 1782119 | 1 endonuclease                                                                               |
| 1736754 | 1830377 | 93623 OXZ32993.1 | B9N53_08565 | 1782137 | 1782883 | -1 ABC transporter permease                                                                  |
| 1736754 | 1830377 | 93623 OXZ32994.1 | B9N53_08570 | 1782898 | 1783590 | -1 ABC transporter permease                                                                  |
| 1736754 | 1830377 | 93623 OXZ32995.1 | B9N53_08575 | 1783592 | 1784506 | -1 bacitracin ABC transporter ATP-binding protein                                            |
| 1736754 | 1830377 | 93623 OXZ32996.1 | B9N53_08580 | 1784521 | 1785678 | -1 hypothetical protein                                                                      |
| 1736754 | 1830377 | 93623 OXZ32997.1 | B9N53_08585 | 1785682 | 1786989 | -1 hypothetical protein                                                                      |
| 1736754 | 1830377 | 93623 OXZ32998.1 | B9N53_08590 | 1787575 | 1789212 | -1 ABC transporter permease<br>CXXX repeat peptide modification system                       |
| 1736754 | 1830377 | 93623 OXZ32999.1 | B9N53_08595 | 1789205 | 1789471 | -1 protein                                                                                   |
| 1736754 | 1830377 | 93623 OXZ33000.1 | B9N53_08600 | 1789473 | 1791662 | -1 radical SAM protein                                                                       |
| 1736754 | 1830377 | 93623 OXZ33001.1 | B9N53_08605 | 1791649 | 1791831 | -1 hypothetical protein                                                                      |
| 1736754 | 1830377 | 93623 OXZ33002.1 | B9N53_08610 | 1791961 | 1792566 | -1 DNA-binding response regulator                                                            |
| 1736754 | 1830377 | 93623 OXZ33003.1 | B9N53_08615 | 1792538 | 1794085 | -1 hypothetical protein                                                                      |
| 1736754 | 1830377 | 93623 OXZ33004.1 | B9N53_08620 | 1794400 | 1795494 | -1 single-stranded DNA-binding protein                                                       |
| 1736754 | 1830377 | 93623 OXZ33005.1 | B9N53_08625 | 1795527 | 1805945 | -1 conjugal transfer protein                                                                 |
| 1736754 | 1830377 | 93623 OXZ33006.1 | B9N53_08630 | 1806140 | 1806466 | -1 terminase large subunit                                                                   |
| 1736754 | 1830377 | 93623 OXZ33007.1 | B9N53_08635 | 1806808 | 1808514 | -1 DNA topoisomerase III                                                                     |
| 1736754 | 1830377 | 93623 OXZ33008.1 | B9N53_08640 | 1808931 | 1809809 | -1 bacteriocin                                                                               |
| 1736754 | 1830377 | 93623 OXZ33009.1 | B9N53_08645 | 1809825 | 1812134 | -1 copper amine oxidase                                                                      |
| 1736754 | 1830377 | 93623 OXZ33010.1 | B9N53_08650 | 1812131 | 1812388 | -1 hypothetical protein                                                                      |
| 1736754 | 1830377 | 93623 OXZ33011.1 | B9N53_08655 | 1812408 | 1815371 | -1 hypothetical protein                                                                      |
| 1736754 | 1830377 | 93623 OXZ33012.1 | B9N53_08660 | 1815381 | 1816346 | -1 site-specific DNA-methyltransferase                                                       |
| 1736754 | 1830377 | 93623 OXZ33013.1 | B9N53_08665 | 1816318 | 1818813 | -1 conjugal transfer protein TraE                                                            |
| 1736754 | 1830377 | 93623 OXZ33014.1 | B9N53_08670 | 1818810 | 1819148 | -1 conjugal transfer protein                                                                 |
| 1736754 | 1830377 | 93623 OXZ33015.1 | B9N53_08675 | 1819148 | 1819405 | -1 hypothetical protein                                                                      |
| 1736754 | 1830377 | 93623 OXZ33016.1 | B9N53_08680 | 1819423 | 1820286 | -1 hypothetical protein                                                                      |
| 1736754 | 1830377 | 93623 OXZ33017.1 | B9N53_08685 | 1820288 | 1820503 | -1 conjugal transfer protein                                                                 |
| 1736754 | 1830377 | 93623 OXZ33018.1 | B9N53_08690 | 1820504 | 1820827 | -1 single-stranded DNA-binding protein                                                       |
| 1736754 | 1830377 | 93623 OXZ33019.1 | B9N53_08695 | 1821017 | 1821880 | -1 CAAX protease                                                                             |
| 1736754 | 1830377 | 93623 OXZ33020.1 | B9N53_08700 | 1822032 | 1823834 | -1 conjugal transfer protein TraG                                                            |
| 1736754 | 1830377 | 93623 OXZ33021.1 | B9N53_08705 | 1823879 | 1824085 | -1 hypothetical protein                                                                      |
| 1736754 | 1830377 | 93623 OXZ33022.1 | B9N53_08710 | 1824282 | 1824773 | -1 DUF3801 domain-containing protein                                                         |
| 1736754 | 1830377 | 93623 OXZ33083.1 | B9N53_08715 | 1824788 | 1825645 | -1 DNA replication protein                                                                   |
| 1736754 | 1830377 | 93623 OXZ33023.1 | B9N53_08720 | 1825660 | 1826637 | -1 replication initiator RepA                                                                |
| 1736754 | 1830377 | 93623 OXZ33024.1 | B9N53_08725 | 1826724 | 1827014 | -1 hypothetical protein                                                                      |
| 1736754 | 1830377 | 93623            | B9N53_08730 | 1827163 | 1828239 | -1 ABC transporter ATP-binding protein                                                       |
| 1736754 | 1830377 | 93623 OXZ33025.1 | B9N53_08735 | 1828498 | 1829421 | -1 RNA-binding protein                                                                       |
| 1736754 | 1830377 | 93623 OXZ33026.1 | B9N53_08740 | 1829418 | 1830149 | -1 insertase<br>membrane protein insertion efficiency factor                                 |
| 1736754 | 1830377 | 93623 OXZ33027.1 | B9N53_08745 | 1830165 | 1830377 | -1 YidD                                                                                      |
| 1736754 | 1830377 | 93623 OXZ33028.1 | B9N53_08750 | 1830365 | 1830706 | -1 ribonuclease P protein component                                                          |
| 1736754 | 1741551 | 4797 OXZ32959.1  | B9N53_08375 | 1736754 | 1737218 | -1 hypothetical protein                                                                      |
| 1736754 | 1741551 | 4797 OXZ32960.1  | B9N53_08380 | 1737303 | 1738106 | -1 DNA-binding protein                                                                       |
| 1736754 | 1741551 | 4797 OXZ32961.1  | B9N53_08385 | 1738296 | 1739816 | -1 conjugal transfer protein                                                                 |
| 1736754 | 1741551 | 4797 OXZ32962.1  | B9N53_08390 | 1739809 | 1741551 | -1 recombinase                                                                               |
| 1736754 | 1741551 | 4797 OXZ32963.1  | B9N53_08395 | 1741544 | 1743262 | -1 recombinase                                                                               |
| 1743361 | 1754706 | 11345 OXZ32964.1 | B9N53_08400 | 1743361 | 1743528 | -1 aminoacyl-tRNA hydrolase                                                                  |
| 1743361 | 1754706 | 11345 OXZ32965.1 | B9N53_08405 | 1743945 | 1744355 | -1 RNA polymerase subunit sigma                                                              |
| 1743361 | 1754706 | 11345 OXZ32966.1 | B9N53_08410 | 1744638 | 1746374 | -1 multidrug ABC transporter ATP-binding protein                                             |
| 1743361 | 1754706 | 11345 OXZ32967.1 | B9N53_08415 | 1746367 | 1748088 | -1 ABC transporter ATP-binding protein                                                       |
| 1743361 | 1754706 | 11345 OXZ32968.1 | B9N53_08420 | 1748126 | 1749478 | -1 MATE family efflux transporter                                                            |
| 1743361 | 1754706 | 11345 OXZ32969.1 | B9N53_08425 | 1749491 | 1750939 | -1 ABC transporter                                                                           |
| 1743361 | 1754706 | 11345 OXZ32970.1 | B9N53_08430 | 1750936 | 1751616 | -1 ABC transporter permease                                                                  |
| 1743361 | 1754706 | 11345 OXZ32971.1 | B9N53_08435 | 1751616 | 1752194 | -1 hypothetical protein                                                                      |
| 1743361 | 1754706 | 11345 OXZ32972.1 | B9N53_08440 | 1752246 | 1752812 | -1 TetR family transcriptional regulator                                                     |
| 1743361 | 1754706 | 11345 OXZ32973.1 | B9N53_08445 | 1752898 | 1753650 | -1 hypothetical protein                                                                      |
| 1743361 | 1754706 | 11345 OXZ32974.1 | B9N53_08450 | 1753651 | 1754706 | -1 saccharopine dehydrogenase                                                                |
| 1760336 | 1776981 | 16645 OXZ32976.1 | B9N53_08460 | 1760336 | 1762276 | -1 condensation protein                                                                      |
| 1760336 | 1776981 | 16645 OXZ32977.1 | B9N53_08465 | 1762289 | 1763875 | -1 2,3-dihydroxybenzoate-AMP ligase                                                          |
| 1760336 | 1776981 | 16645 OXZ32978.1 | B9N53_08470 | 1763875 | 1764567 | -1 4-phosphopantetheinyl transferase                                                         |
| 1760336 | 1776981 | 16645 OXZ32979.1 | B9N53_08475 | 1764557 | 1765309 | -1 thioesterase                                                                              |
| 1760336 | 1776981 | 16645 OXZ32980.1 | B9N53_08480 | 1765470 | 1765841 | -1 transcriptional regulator                                                                 |
| 1760336 | 1776981 | 16645 OXZ32981.1 | B9N53_08485 | 1766366 | 1766734 | 1 plasmid mobilization relaxosome protein MobC                                               |
| 1760336 | 1776981 | 16645 OXZ32982.1 | B9N53_08490 | 1766734 | 1768104 | 1 endonuclease                                                                               |
| 1760336 | 1776981 | 16645            | B9N53_08495 | 1768445 | 1769660 | -1 IS256 family transposase                                                                  |
| 1760336 | 1776981 | 16645 OXZ32983.1 | B9N53_08500 | 1769853 | 1770317 | -1 hypothetical protein<br>bacteriocin/lantibiotic ABC transporter ATP-                      |
| 1760336 | 1776981 | 16645 OXZ32984.1 | B9N53_08505 | 1770441 | 1772564 | -1 binding protein                                                                           |
| 1760336 | 1776981 | 16645 OXZ32985.1 | B9N53_08510 | 1772654 | 1775869 | -1 type 2 lantipeptide synthetase LanM<br>type 2 lantibiotic, mersacidin/lichenicidin family |
| 1760336 | 1776981 | 16645 OXZ32986.1 | B9N53_08515 | 1775957 | 1776184 | -1 protein                                                                                   |
| 1760336 | 1776981 | 16645 OXZ32987.1 | B9N53_08520 | 1776259 | 1776981 | -1 ABC transporter permease                                                                  |
| 1778911 | 1816346 | 37435            | B9N53_08535 | 1778911 | 1779289 | -1 hypothetical protein                                                                      |
| 1778911 | 1816346 | 37435 OXZ32990.1 | B9N53_08540 | 1779302 | 1779568 | -1 hypothetical protein                                                                      |
| 1778911 | 1816346 | 37435 OXZ32991.1 | B9N53_08545 | 1779562 | 1780131 | -1 hypothetical protein                                                                      |
| 1778911 | 1816346 | 37435            | B9N53_08550 | 1780470 | 1780774 | 1 relaxase                                                                                   |
| 1778911 | 1816346 | 37435 OXZ32992.1 | B9N53_08555 | 1780793 | 1781224 | -1 hypothetical protein                                                                      |
| 1778911 | 1816346 | 37435            | B9N53_08560 | 1781178 | 1782119 | 1 endonuclease                                                                               |
| 1778911 | 1816346 | 37435 OXZ32993.1 | B9N53_08565 | 1782137 | 1782883 | -1 ABC transporter permease                                                                  |
| 1778911 | 1816346 | 37435 OXZ32994.1 | B9N53_08570 | 1782898 | 1783590 | -1 ABC transporter permease                                                                  |

|         |         |                  |             |         |         |                                                                        |
|---------|---------|------------------|-------------|---------|---------|------------------------------------------------------------------------|
| 1778911 | 1816346 | 37435 OXZ32995.1 | B9N53_08575 | 1783592 | 1784506 | -1 bacitracin ABC transporter ATP-binding protein                      |
| 1778911 | 1816346 | 37435 OXZ32996.1 | B9N53_08580 | 1784521 | 1785678 | -1 hypothetical protein                                                |
| 1778911 | 1816346 | 37435 OXZ32997.1 | B9N53_08585 | 1785682 | 1786989 | -1 hypothetical protein                                                |
| 1778911 | 1816346 | 37435 OXZ32998.1 | B9N53_08590 | 1787575 | 1789212 | -1 ABC transporter permease<br>CXXX repeat peptide modification system |
| 1778911 | 1816346 | 37435 OXZ32999.1 | B9N53_08595 | 1789205 | 1789471 | -1 protein                                                             |
| 1778911 | 1816346 | 37435 OXZ33000.1 | B9N53_08600 | 1789473 | 1791662 | -1 radical SAM protein                                                 |
| 1778911 | 1816346 | 37435 OXZ33001.1 | B9N53_08605 | 1791649 | 1791831 | -1 hypothetical protein                                                |
| 1778911 | 1816346 | 37435 OXZ33002.1 | B9N53_08610 | 1791961 | 1792566 | -1 DNA-binding response regulator                                      |
| 1778911 | 1816346 | 37435 OXZ33003.1 | B9N53_08615 | 1792538 | 1794085 | -1 hypothetical protein                                                |
| 1778911 | 1816346 | 37435 OXZ33004.1 | B9N53_08620 | 1794400 | 1795494 | -1 single-stranded DNA-binding protein                                 |
| 1778911 | 1816346 | 37435 OXZ33005.1 | B9N53_08625 | 1795527 | 1805945 | -1 conjugal transfer protein                                           |
| 1778911 | 1816346 | 37435 OXZ33006.1 | B9N53_08630 | 1806140 | 1806466 | -1 terminase large subunit                                             |
| 1778911 | 1816346 | 37435 OXZ33007.1 | B9N53_08635 | 1806808 | 1808514 | -1 DNA topoisomerase III                                               |
| 1778911 | 1816346 | 37435 OXZ33008.1 | B9N53_08640 | 1808931 | 1809809 | -1 bacteriocin                                                         |
| 1778911 | 1816346 | 37435 OXZ33009.1 | B9N53_08645 | 1809825 | 1812134 | -1 copper amine oxidase                                                |
| 1778911 | 1816346 | 37435 OXZ33010.1 | B9N53_08650 | 1812131 | 1812388 | -1 hypothetical protein                                                |
| 1778911 | 1816346 | 37435 OXZ33011.1 | B9N53_08655 | 1812408 | 1815371 | -1 hypothetical protein                                                |
| 1778911 | 1816346 | 37435 OXZ33012.1 | B9N53_08660 | 1815381 | 1816346 | -1 site-specific DNA-methyltransferase                                 |
| 1778911 | 1816346 | 37435 OXZ33013.1 | B9N53_08665 | 1816318 | 1818813 | -1 conjugal transfer protein TraE                                      |
| 1818810 | 1827014 | 8204 OXZ33013.1  | B9N53_08665 | 1816318 | 1818813 | -1 conjugal transfer protein TraE                                      |
| 1818810 | 1827014 | 8204 OXZ33014.1  | B9N53_08670 | 1818810 | 1819148 | -1 conjugal transfer protein                                           |
| 1818810 | 1827014 | 8204 OXZ33015.1  | B9N53_08675 | 1819148 | 1819405 | -1 hypothetical protein                                                |
| 1818810 | 1827014 | 8204 OXZ33016.1  | B9N53_08680 | 1819423 | 1820286 | -1 hypothetical protein                                                |
| 1818810 | 1827014 | 8204 OXZ33017.1  | B9N53_08685 | 1820288 | 1820503 | -1 conjugal transfer protein                                           |
| 1818810 | 1827014 | 8204 OXZ33018.1  | B9N53_08690 | 1820504 | 1820827 | -1 single-stranded DNA-binding protein                                 |
| 1818810 | 1827014 | 8204 OXZ33019.1  | B9N53_08695 | 1821017 | 1821880 | -1 CAAX protease                                                       |
| 1818810 | 1827014 | 8204 OXZ33020.1  | B9N53_08700 | 1822032 | 1823834 | -1 conjugal transfer protein TraG                                      |
| 1818810 | 1827014 | 8204 OXZ33021.1  | B9N53_08705 | 1823879 | 1824085 | -1 hypothetical protein                                                |
| 1818810 | 1827014 | 8204 OXZ33022.1  | B9N53_08710 | 1824282 | 1824773 | -1 DUF3801 domain-containing protein                                   |
| 1818810 | 1827014 | 8204 OXZ33083.1  | B9N53_08715 | 1824788 | 1825645 | -1 DNA replication protein                                             |
| 1818810 | 1827014 | 8204 OXZ33023.1  | B9N53_08720 | 1825660 | 1826637 | -1 replication initiator RepA                                          |
| 1818810 | 1827014 | 8204 OXZ33024.1  | B9N53_08725 | 1826724 | 1827014 | -1 hypothetical protein                                                |
| 1885694 | 1892257 | 6563 OXZ32597.1  | B9N53_09040 | 1885694 | 1886158 | 1 IS200/IS605 family transposase                                       |
| 1885694 | 1892257 | 6563 OXZ32598.1  | B9N53_09035 | 1891243 | 1892257 | 1 elongation factor Tu                                                 |

**Table S3F: Predicted genomic islands in the genome of "F. nericia" 12T273**

Shown are genes of genomic islands predicted by IslandViewer4

| Island start | Island end | Length | Gene name  | Locus       | Gene start | Gene end | Strand | Product                                        |
|--------------|------------|--------|------------|-------------|------------|----------|--------|------------------------------------------------|
| 97479        | 122315     | 24836  | OXZ35127.1 | B9N55_00530 | 97479      | 97877    | -1     | hypothetical protein                           |
| 97479        | 122315     | 24836  | OXZ35128.1 | B9N55_00535 | 97946      | 98398    | -1     | small-multidrug export protein                 |
| 97479        | 122315     | 24836  | OXZ35129.1 | B9N55_00540 | 98407      | 99057    | -1     | phosphatase                                    |
| 97479        | 122315     | 24836  | OXZ35130.1 | B9N55_00545 | 99219      | 100451   | 1      | aminopeptidase                                 |
| 97479        | 122315     | 24836  | OXZ35131.1 | B9N55_00550 | 100451     | 102247   | 1      | oligoendopeptidase F                           |
| 97479        | 122315     | 24836  | OXZ35132.1 | B9N55_00555 | 102300     | 103184   | 1      | antibiotic ABC transporter ATP-binding protein |
| 97479        | 122315     | 24836  | OXZ35133.1 | B9N55_00560 | 103177     | 103929   | 1      | antibiotic ABC transporter permease            |
| 97479        | 122315     | 24836  | OXZ35134.1 | B9N55_00565 | 103919     | 104590   | 1      | antibiotic ABC transporter permease            |
| 97479        | 122315     | 24836  | OXZ35135.1 | B9N55_00570 | 104590     | 105891   | 1      | MFS transporter                                |
| 97479        | 122315     | 24836  | OXZ35136.1 | B9N55_00575 | 105948     | 106307   | 1      | superoxide reductase                           |
| 97479        | 122315     | 24836  | OXZ35137.1 | B9N55_00580 | 106460     | 107821   | 1      | hypothetical protein                           |
| 97479        | 122315     | 24836  | OXZ35138.1 | B9N55_00585 | 107859     | 108398   | 1      | transposase                                    |
| 97479        | 122315     | 24836  | OXZ35172.1 | B9N55_00590 | 108593     | 109255   | 1      | transposase                                    |
| 97479        | 122315     | 24836  | OXZ35139.1 | B9N55_00595 | 109420     | 109656   | 1      | hypothetical protein                           |
| 97479        | 122315     | 24836  | OXZ35140.1 | B9N55_00600 | 109674     | 110216   | 1      | LemA family protein                            |
| 97479        | 122315     | 24836  | OXZ35141.1 | B9N55_00605 | 110340     | 111248   | 1      | coproporphyrinogen III oxidase                 |
| 97479        | 122315     | 24836  | OXZ35142.1 | B9N55_00610 | 111248     | 111976   | 1      | biotin--[acetyl-CoA-carboxylase] ligase        |
| 97479        | 122315     | 24836  | OXZ35143.1 | B9N55_00615 | 111989     | 112216   | -1     | hypothetical protein                           |
| 97479        | 122315     | 24836  | OXZ35144.1 | B9N55_00620 | 112308     | 112709   | 1      | transcriptional regulator                      |
| 97479        | 122315     | 24836  | OXZ35145.1 | B9N55_00625 | 112747     | 112962   | 1      | heavy metal transporter                        |
| 97479        | 122315     | 24836  | OXZ35146.1 | B9N55_00630 | 112962     | 114773   | 1      | cadmium-translocating P-type ATPase            |
| 97479        | 122315     | 24836  | OXZ35147.1 | B9N55_00635 | 114820     | 115131   | 1      | hypothetical protein                           |
| 97479        | 122315     | 24836  | OXZ35148.1 | B9N55_00640 | 115179     | 115445   | -1     | cytotoxin                                      |
| 97479        | 122315     | 24836  | OXZ35149.1 | B9N55_00645 | 115445     | 115702   | -1     | AbrB family transcriptional regulator          |
| 97479        | 122315     | 24836  | OXZ35150.1 | B9N55_00650 | 115806     | 116378   | -1     | riboflavin transporter                         |
| 97479        | 122315     | 24836  | OXZ35151.1 | B9N55_00655 | 116449     | 117591   | -1     | 2-iminoacetate synthase ThiH                   |
| 97479        | 122315     | 24836  | OXZ35152.1 | B9N55_00660 | 117599     | 118363   | -1     | thiazole synthase                              |
| 97479        | 122315     | 24836  | OXZ35153.1 | B9N55_00665 | 118353     | 118949   | -1     | thiamine biosynthesis protein ThiF             |
| 97479        | 122315     | 24836  | OXZ35154.1 | B9N55_00670 | 118951     | 119148   | -1     | thiamine biosynthesis protein ThiS             |
| 97479        | 122315     | 24836  | OXZ35155.1 | B9N55_00675 | 119369     | 119980   | 1      | glutathione S-transferase                      |
| 97479        | 122315     | 24836  | OXZ35156.1 | B9N55_00680 | 120077     | 120778   | 1      | SAM-dependent methyltransferase                |
| 97479        | 122315     | 24836  | OXZ35157.1 | B9N55_00685 | 120795     | 122315   | 1      | magnesium chelatase                            |
| 138212       | 146541     | 8329   | OXZ34581.1 | B9N55_00760 | 138212     | 138409   | 1      | transcriptional regulator                      |
| 138212       | 146541     | 8329   | OXZ34582.1 | B9N55_00765 | 138461     | 139141   | 1      | hypothetical protein                           |
| 138212       | 146541     | 8329   | OXZ34583.1 | B9N55_00770 | 139134     | 140561   | 1      | hypothetical protein                           |
| 138212       | 146541     | 8329   | OXZ34584.1 | B9N55_00775 | 141104     | 142303   | 1      | hypothetical protein                           |
| 138212       | 146541     | 8329   | OXZ34585.1 | B9N55_00780 | 142319     | 143197   | 1      | hypothetical protein                           |
| 138212       | 146541     | 8329   | OXZ34586.1 | B9N55_00785 | 143175     | 143927   | 1      | hypothetical protein                           |
| 138212       | 146541     | 8329   | OXZ34587.1 | B9N55_00790 | 143928     | 144536   | 1      | hypothetical protein                           |
| 138212       | 146541     | 8329   | OXZ34588.1 | B9N55_00795 | 144536     | 144958   | 1      | hypothetical protein                           |
| 138212       | 146541     | 8329   | OXZ34589.1 | B9N55_00800 | 144961     | 146541   | 1      | hypothetical protein                           |
| 138461       | 157045     | 18584  | OXZ34582.1 | B9N55_00765 | 138461     | 139141   | 1      | hypothetical protein                           |
| 138461       | 157045     | 18584  | OXZ34583.1 | B9N55_00770 | 139134     | 140561   | 1      | hypothetical protein                           |
| 138461       | 157045     | 18584  | OXZ34584.1 | B9N55_00775 | 141104     | 142303   | 1      | hypothetical protein                           |
| 138461       | 157045     | 18584  | OXZ34585.1 | B9N55_00780 | 142319     | 143197   | 1      | hypothetical protein                           |
| 138461       | 157045     | 18584  | OXZ34586.1 | B9N55_00785 | 143175     | 143927   | 1      | hypothetical protein                           |
| 138461       | 157045     | 18584  | OXZ34587.1 | B9N55_00790 | 143928     | 144536   | 1      | hypothetical protein                           |
| 138461       | 157045     | 18584  | OXZ34588.1 | B9N55_00795 | 144536     | 144958   | 1      | hypothetical protein                           |
| 138461       | 157045     | 18584  | OXZ34589.1 | B9N55_00800 | 144961     | 146541   | 1      | hypothetical protein                           |
| 138461       | 157045     | 18584  | OXZ34590.1 | B9N55_00805 | 146635     | 147177   | 1      | hypothetical protein                           |
| 138461       | 157045     | 18584  | OXZ34591.1 | B9N55_00810 | 147277     | 148146   | 1      | hypothetical protein                           |
| 138461       | 157045     | 18584  | OXZ34592.1 | B9N55_00815 | 148133     | 150121   | 1      | exopolyphosphatase                             |
| 138461       | 157045     | 18584  | OXZ34593.1 | B9N55_00820 | 150102     | 150548   | 1      | 50S ribosomal protein L9                       |
| 138461       | 157045     | 18584  | OXZ34594.1 | B9N55_00825 | 150582     | 151919   | 1      | replicative DNA helicase                       |
| 138461       | 157045     | 18584  | OXZ34595.1 | B9N55_00830 | 151916     | 152479   | 1      | GNAT family N-acetyltransferase                |
| 138461       | 157045     | 18584  | OXZ34596.1 | B9N55_00835 | 152484     | 153242   | 1      | DNA replication protein                        |
| 138461       | 157045     | 18584  | OXZ34597.1 | B9N55_00840 | 153245     | 154222   | 1      | DNA replication protein DnaC                   |
| 138461       | 157045     | 18584  | OXZ34598.1 | B9N55_00845 | 154219     | 154863   | 1      | NAD(P)H-hydrate epimerase                      |
| 138461       | 157045     | 18584  | OXZ34599.1 | B9N55_00850 | 155059     | 155238   | 1      | hypothetical protein                           |
| 138461       | 157045     | 18584  | OXZ34600.1 | B9N55_00855 | 155833     | 156375   | 1      | ECF transporter S component                    |
| 138461       | 157045     | 18584  | OXZ34601.1 | B9N55_00860 | 156359     | 157045   | 1      | radical SAM protein                            |
| 253324       | 260267     | 6943   | OXZ34217.1 | B9N55_01390 | 253324     | 254190   | 1      | class C sortase                                |
| 253324       | 260267     | 6943   | OXZ34218.1 | B9N55_01395 | 254177     | 255016   | 1      | class C sortase                                |
| 253324       | 260267     | 6943   | OXZ34219.1 | B9N55_01400 | 255003     | 255857   | 1      | class C sortase                                |
| 253324       | 260267     | 6943   | OXZ34220.1 | B9N55_01405 | 255917     | 256558   | -1     | hemolysin III                                  |
| 253324       | 260267     | 6943   | OXZ34221.1 | B9N55_01410 | 256712     | 257215   | 1      | acetyltransferase                              |
| 253324       | 260267     | 6943   | OXZ34222.1 | B9N55_01415 | 257215     | 257952   | 1      | hydrolase                                      |
| 253324       | 260267     | 6943   |            | B9N55_01420 | 259693     | 260267   | 1      | cell filamentation protein Fic                 |
| 310452       | 354643     | 44191  | OXZ34265.1 | B9N55_01640 | 310452     | 310676   | 1      | hypothetical protein                           |
| 310452       | 354643     | 44191  | OXZ34266.1 | B9N55_01645 | 310938     | 311525   | 1      | RNA polymerase subunit sigma-24                |
| 310452       | 354643     | 44191  | OXZ34267.1 | B9N55_01650 | 311611     | 311862   | 1      | hypothetical protein                           |
| 310452       | 354643     | 44191  | OXZ34268.1 | B9N55_01655 | 311804     | 312103   | 1      | hypothetical protein                           |
| 310452       | 354643     | 44191  | OXZ34269.1 | B9N55_01660 | 312103     | 313215   | 1      | nuclease                                       |
| 310452       | 354643     | 44191  | OXZ34270.1 | B9N55_01665 | 313181     | 313768   | 1      | hypothetical protein                           |
| 310452       | 354643     | 44191  | OXZ34271.1 | B9N55_01670 | 313778     | 313978   | 1      | hypothetical protein                           |
| 310452       | 354643     | 44191  | OXZ34272.1 | B9N55_01675 | 313953     | 316811   | 1      | hypothetical protein                           |
| 310452       | 354643     | 44191  | OXZ34273.1 | B9N55_01680 | 316824     | 317024   | 1      | hypothetical protein                           |
| 310452       | 354643     | 44191  | OXZ34274.1 | B9N55_01685 | 317017     | 317403   | 1      | DUF4406 domain-containing protein              |
| 310452       | 354643     | 44191  | OXZ34275.1 | B9N55_01690 | 317404     | 319605   | 1      | DNA primase                                    |
| 310452       | 354643     | 44191  | OXZ34276.1 | B9N55_01695 | 319870     | 320127   | 1      | hypothetical protein                           |
| 310452       | 354643     | 44191  | OXZ34277.1 | B9N55_01700 | 320085     | 320366   | 1      | nuclease                                       |
| 310452       | 354643     | 44191  | OXZ34278.1 | B9N55_01705 | 320367     | 321713   | 1      | DEAD/DEAH box helicase                         |



|        |        |       |            |             |        |        |                                                 |
|--------|--------|-------|------------|-------------|--------|--------|-------------------------------------------------|
| 310452 | 354643 | 44191 | OXZ34279.1 | B9N55_01710 | 321806 | 322234 | 1 hypothetical protein                          |
| 310452 | 354643 | 44191 | OXZ34280.1 | B9N55_01715 | 322334 | 322699 | 1 HNH endonuclease                              |
| 310452 | 354643 | 44191 | OXZ34281.1 | B9N55_01720 | 322922 | 323389 | 1 terminase                                     |
| 310452 | 354643 | 44191 | OXZ34282.1 | B9N55_01725 | 323395 | 324177 | 1 S-adenosylmethionine synthetase               |
| 310452 | 354643 | 44191 | OXZ34344.1 | B9N55_01730 | 324177 | 325427 | 1 DNA methylase                                 |
| 310452 | 354643 | 44191 | OXZ34283.1 | B9N55_01735 | 325420 | 326016 | 1 endonuclease                                  |
| 310452 | 354643 | 44191 | OXZ34284.1 | B9N55_01740 | 326018 | 327460 | 1 DNA (cytosine-5-)-methyltransferase           |
| 310452 | 354643 | 44191 | OXZ34285.1 | B9N55_01745 | 327504 | 327728 | 1 DUF4314 domain-containing protein             |
| 310452 | 354643 | 44191 | OXZ34286.1 | B9N55_01750 | 327814 | 328146 | 1 hypothetical protein                          |
| 310452 | 354643 | 44191 | OXZ34287.1 | B9N55_01755 | 328147 | 328377 | 1 hypothetical protein                          |
| 310452 | 354643 | 44191 | OXZ34288.1 | B9N55_01760 | 328470 | 330059 | 1 terminase                                     |
| 310452 | 354643 | 44191 | OXZ34289.1 | B9N55_01765 | 330104 | 330523 | 1 conjugal transfer protein                     |
| 310452 | 354643 | 44191 | OXZ34290.1 | B9N55_01770 | 330563 | 331837 | 1 phage portal protein                          |
| 310452 | 354643 | 44191 | OXZ34291.1 | B9N55_01775 | 331827 | 332513 | 1 peptidase                                     |
| 310452 | 354643 | 44191 | OXZ34292.1 | B9N55_01780 | 332518 | 333708 | 1 phage major capsid protein                    |
| 310452 | 354643 | 44191 | OXZ34293.1 | B9N55_01785 | 333719 | 333991 | 1 AraC family transcriptional regulator         |
| 310452 | 354643 | 44191 | OXZ34294.1 | B9N55_01790 | 333991 | 334323 | 1 phage head-tail adapter protein               |
| 310452 | 354643 | 44191 | OXZ34295.1 | B9N55_01795 | 334320 | 334700 | 1 hypothetical protein                          |
| 310452 | 354643 | 44191 | OXZ34296.1 | B9N55_01800 | 334693 | 335019 | 1 hypothetical protein                          |
| 310452 | 354643 | 44191 | OXZ34297.1 | B9N55_01805 | 335012 | 335191 | 1 hypothetical protein                          |
| 310452 | 354643 | 44191 | OXZ34298.1 | B9N55_01810 | 335181 | 335777 | 1 phage tail protein                            |
| 310452 | 354643 | 44191 | OXZ34299.1 | B9N55_01815 | 335780 | 336136 | 1 hypothetical protein                          |
| 310452 | 354643 | 44191 | OXZ34300.1 | B9N55_01820 | 336315 | 336644 | -1 addiction module toxin RelE                  |
| 310452 | 354643 | 44191 | OXZ34301.1 | B9N55_01825 | 336641 | 336964 | -1 prevent-host-death protein                   |
| 310452 | 354643 | 44191 | OXZ34302.1 | B9N55_01830 | 337054 | 340119 | 1 phage tail tape measure protein               |
| 310452 | 354643 | 44191 | OXZ34303.1 | B9N55_01835 | 340122 | 340484 | 1 hypothetical protein                          |
| 310452 | 354643 | 44191 | OXZ34304.1 | B9N55_01840 | 340484 | 342355 | 1 hypothetical protein                          |
| 310452 | 354643 | 44191 | OXZ34305.1 | B9N55_01845 | 342342 | 343721 | 1 hypothetical protein                          |
| 310452 | 354643 | 44191 | OXZ34306.1 | B9N55_01850 | 343723 | 344124 | 1 holin                                         |
| 310452 | 354643 | 44191 | OXZ34307.1 | B9N55_01855 | 344125 | 344934 | 1 lysozyme                                      |
| 310452 | 354643 | 44191 | OXZ34308.1 | B9N55_01860 | 345111 | 345701 | 1 TetR family transcriptional regulator         |
| 310452 | 354643 | 44191 | OXZ34309.1 | B9N55_01865 | 345706 | 347424 | 1 ABC transporter ATP-binding protein           |
| 310452 | 354643 | 44191 | OXZ34310.1 | B9N55_01870 | 347417 | 349153 | 1 multidrug ABC transporter ATP-binding protein |
| 310452 | 354643 | 44191 | OXZ34311.1 | B9N55_01875 | 349418 | 349627 | 1 hypothetical protein                          |
| 310452 | 354643 | 44191 | OXZ34312.1 | B9N55_01880 | 349687 | 351249 | 1 recombinase family protein                    |
| 310452 | 354643 | 44191 | OXZ34313.1 | B9N55_01885 | 351242 | 351658 | 1 integrase                                     |
| 310452 | 354643 | 44191 | OXZ34314.1 | B9N55_01890 | 351651 | 353213 | 1 recombinase family protein                    |
| 310452 | 354643 | 44191 | OXZ34345.1 | B9N55_01895 | 353285 | 353923 | 1 TetR family transcriptional regulator         |
| 310452 | 354643 | 44191 | OXZ34315.1 | B9N55_01900 | 354047 | 354643 | 1 hypothetical protein                          |
| 310452 | 354643 | 44191 | OXZ34316.1 | B9N55_01905 | 354633 | 355346 | 1 ABC transporter permease                      |
| 322334 | 331837 | 9503  | OXZ34280.1 | B9N55_01715 | 322334 | 322699 | 1 HNH endonuclease                              |
| 322334 | 331837 | 9503  | OXZ34281.1 | B9N55_01720 | 322922 | 323389 | 1 terminase                                     |
| 322334 | 331837 | 9503  | OXZ34282.1 | B9N55_01725 | 323395 | 324177 | 1 S-adenosylmethionine synthetase               |
| 322334 | 331837 | 9503  | OXZ34344.1 | B9N55_01730 | 324177 | 325427 | 1 DNA methylase                                 |
| 322334 | 331837 | 9503  | OXZ34283.1 | B9N55_01735 | 325420 | 326016 | 1 endonuclease                                  |
| 322334 | 331837 | 9503  | OXZ34284.1 | B9N55_01740 | 326018 | 327460 | 1 DNA (cytosine-5-)-methyltransferase           |
| 322334 | 331837 | 9503  | OXZ34285.1 | B9N55_01745 | 327504 | 327728 | 1 DUF4314 domain-containing protein             |
| 322334 | 331837 | 9503  | OXZ34286.1 | B9N55_01750 | 327814 | 328146 | 1 hypothetical protein                          |
| 322334 | 331837 | 9503  | OXZ34287.1 | B9N55_01755 | 328147 | 328377 | 1 hypothetical protein                          |
| 322334 | 331837 | 9503  | OXZ34288.1 | B9N55_01760 | 328470 | 330059 | 1 terminase                                     |
| 322334 | 331837 | 9503  | OXZ34289.1 | B9N55_01765 | 330104 | 330523 | 1 conjugal transfer protein                     |
| 322334 | 331837 | 9503  | OXZ34290.1 | B9N55_01770 | 330563 | 331837 | 1 phage portal protein                          |
| 322334 | 331837 | 9503  | OXZ34291.1 | B9N55_01775 | 331827 | 332513 | 1 peptidase                                     |
| 340122 | 345701 | 5579  | OXZ34303.1 | B9N55_01835 | 340122 | 340484 | 1 hypothetical protein                          |
| 340122 | 345701 | 5579  | OXZ34304.1 | B9N55_01840 | 340484 | 342355 | 1 hypothetical protein                          |
| 340122 | 345701 | 5579  | OXZ34305.1 | B9N55_01845 | 342342 | 343721 | 1 hypothetical protein                          |
| 340122 | 345701 | 5579  | OXZ34306.1 | B9N55_01850 | 343723 | 344124 | 1 holin                                         |
| 340122 | 345701 | 5579  | OXZ34307.1 | B9N55_01855 | 344125 | 344934 | 1 lysozyme                                      |
| 340122 | 345701 | 5579  | OXZ34308.1 | B9N55_01860 | 345111 | 345701 | 1 TetR family transcriptional regulator         |
| 365736 | 388679 | 22943 | OXZ34323.1 | B9N55_01945 | 365736 | 366485 | 1 phosphorylase                                 |
| 365736 | 388679 | 22943 | OXZ34324.1 | B9N55_01950 | 366790 | 367440 | 1 hypothetical protein                          |
| 365736 | 388679 | 22943 | OXZ34325.1 | B9N55_01955 | 368197 | 369045 | 1 AraC family transcriptional regulator         |
| 365736 | 388679 | 22943 | OXZ34346.1 | B9N55_01960 | 369129 | 369554 | 1 abortive infection protein                    |
| 365736 | 388679 | 22943 |            | B9N55_01965 | 369808 | 370324 | 1 FRG domain-containing protein                 |
| 365736 | 388679 | 22943 | OXZ34326.1 | B9N55_01970 | 370372 | 370926 | 1 hypothetical protein                          |
| 365736 | 388679 | 22943 |            | B9N55_01975 | 370978 | 371348 | 1 hypothetical protein                          |
| 365736 | 388679 | 22943 |            | B9N55_01980 | 371494 | 371690 | 1 transcriptional regulator                     |
| 365736 | 388679 | 22943 | OXZ34327.1 | B9N55_01985 | 371742 | 372425 | 1 hypothetical protein                          |
| 365736 | 388679 | 22943 | OXZ34328.1 | B9N55_01990 | 372418 | 373839 | 1 hypothetical protein                          |
| 365736 | 388679 | 22943 | OXZ34329.1 | B9N55_01995 | 373991 | 374878 | 1 hypothetical protein                          |
| 365736 | 388679 | 22943 | OXZ34330.1 | B9N55_02000 | 374862 | 375614 | 1 hypothetical protein                          |
| 365736 | 388679 | 22943 |            | B9N55_02005 | 375964 | 376360 | 1 hypothetical protein                          |
| 365736 | 388679 | 22943 | OXZ34331.1 | B9N55_02010 | 376681 | 376884 | 1 hypothetical protein                          |
| 365736 | 388679 | 22943 | OXZ34332.1 | B9N55_02015 | 376884 | 377798 | 1 ABC transporter ATP-binding protein           |
| 365736 | 388679 | 22943 | OXZ34333.1 | B9N55_02020 | 377795 | 378562 | 1 hypothetical protein                          |
| 365736 | 388679 | 22943 | OXZ34334.1 | B9N55_02025 | 378576 | 379679 | 1 transcriptional regulator                     |
| 365736 | 388679 | 22943 | OXZ34335.1 | B9N55_02030 | 379851 | 380051 | 1 transcriptional regulator                     |
| 365736 | 388679 | 22943 | OXZ34336.1 | B9N55_02035 | 380210 | 380791 | 1 hypothetical protein                          |
| 365736 | 388679 | 22943 | OXZ34337.1 | B9N55_02040 | 381213 | 382211 | -1 AraC family transcriptional regulator        |
| 365736 | 388679 | 22943 | OXZ34338.1 | B9N55_02045 | 382372 | 384126 | 1 ABC transporter ATP-binding protein           |
| 365736 | 388679 | 22943 | OXZ34339.1 | B9N55_02050 | 384110 | 385831 | 1 ABC transporter ATP-binding protein           |
| 365736 | 388679 | 22943 | OXZ34340.1 | B9N55_02055 | 385843 | 387186 | 1 MATE family efflux transporter                |
| 365736 | 388679 | 22943 | OXZ34341.1 | B9N55_02060 | 387338 | 387591 | -1 IS110 family transposase                     |
| 365736 | 388679 | 22943 | OXZ33675.1 | B9N55_02065 | 388592 | 388679 | 1 hypothetical protein                          |
| 365736 | 376884 | 11148 | OXZ34323.1 | B9N55_01945 | 365736 | 366485 | 1 phosphorylase                                 |
| 365736 | 376884 | 11148 | OXZ34324.1 | B9N55_01950 | 366790 | 367440 | 1 hypothetical protein                          |

|         |         |                  |             |         |         |                                                    |
|---------|---------|------------------|-------------|---------|---------|----------------------------------------------------|
| 365736  | 376884  | 11148 OXZ34325.1 | B9N55_01955 | 368197  | 369045  | 1 AraC family transcriptional regulator            |
| 365736  | 376884  | 11148 OXZ34346.1 | B9N55_01960 | 369129  | 369554  | 1 abortive infection protein                       |
| 365736  | 376884  | 11148            | B9N55_01965 | 369808  | 370324  | 1 FRG domain-containing protein                    |
| 365736  | 376884  | 11148 OXZ34326.1 | B9N55_01970 | 370372  | 370926  | 1 hypothetical protein                             |
| 365736  | 376884  | 11148            | B9N55_01975 | 370978  | 371348  | 1 hypothetical protein                             |
| 365736  | 376884  | 11148            | B9N55_01980 | 371494  | 371690  | 1 transcriptional regulator                        |
| 365736  | 376884  | 11148 OXZ34327.1 | B9N55_01985 | 371742  | 372425  | 1 hypothetical protein                             |
| 365736  | 376884  | 11148 OXZ34328.1 | B9N55_01990 | 372418  | 373839  | 1 hypothetical protein                             |
| 365736  | 376884  | 11148 OXZ34329.1 | B9N55_01995 | 373991  | 374878  | 1 hypothetical protein                             |
| 365736  | 376884  | 11148 OXZ34330.1 | B9N55_02000 | 374862  | 375614  | 1 hypothetical protein                             |
| 365736  | 376884  | 11148            | B9N55_02005 | 375964  | 376360  | 1 hypothetical protein                             |
| 365736  | 376884  | 11148 OXZ34331.1 | B9N55_02010 | 376681  | 376884  | 1 hypothetical protein                             |
| 379851  | 384126  | 4275 OXZ34335.1  | B9N55_02030 | 379851  | 380051  | 1 transcriptional regulator                        |
| 379851  | 384126  | 4275 OXZ34336.1  | B9N55_02035 | 380210  | 380791  | 1 hypothetical protein                             |
| 379851  | 384126  | 4275 OXZ34337.1  | B9N55_02040 | 381213  | 382211  | -1 AraC family transcriptional regulator           |
| 379851  | 384126  | 4275 OXZ34338.1  | B9N55_02045 | 382372  | 384126  | 1 ABC transporter ATP-binding protein              |
| 379851  | 384126  | 4275 OXZ34339.1  | B9N55_02050 | 384110  | 385831  | 1 ABC transporter ATP-binding protein              |
| 569426  | 590255  | 20829 OXZ33831.1 | B9N55_02880 | 568056  | 569435  | -1 two-component sensor histidine kinase           |
| 569426  | 590255  | 20829 OXZ33832.1 | B9N55_02885 | 569426  | 570085  | -1 DNA-binding response regulator                  |
| 569426  | 590255  | 20829 OXZ33833.1 | B9N55_02890 | 570118  | 570858  | -1 mutacin I biosynthesis protein MutG             |
| 569426  | 590255  | 20829 OXZ33834.1 | B9N55_02895 | 570858  | 571598  | -1 antibiotic ABC transporter permease             |
| 569426  | 590255  | 20829 OXZ33835.1 | B9N55_02900 | 571602  | 572303  | -1 lantibiotic ABC transporter ATP-binding protein |
| 569426  | 590255  | 20829 OXZ33836.1 | B9N55_02905 | 572915  | 574204  | 1 hypothetical protein                             |
| 569426  | 590255  | 20829 OXZ33837.1 | B9N55_02910 | 574703  | 575230  | 1 transcriptional regulator                        |
| 569426  | 590255  | 20829            | B9N55_02915 | 575250  | 575632  | 1 conjugal transfer protein TraA                   |
| 569426  | 590255  | 20829 OXZ33838.1 | B9N55_02920 | 575768  | 576340  | 1 uracil-DNA glycosylase                           |
| 569426  | 590255  | 20829 OXZ33839.1 | B9N55_02925 | 576408  | 576695  | 1 cupin                                            |
| 569426  | 590255  | 20829 OXZ33840.1 | B9N55_02930 | 577333  | 579390  | 1 elongation factor G                              |
| 569426  | 590255  | 20829 OXZ33841.1 | B9N55_02935 | 579752  | 580417  | -1 hypothetical protein                            |
| 569426  | 590255  | 20829 OXZ33842.1 | B9N55_02940 | 580526  | 581422  | 1 cysteine synthase A                              |
| 569426  | 590255  | 20829 OXZ33843.1 | B9N55_02945 | 581409  | 581933  | 1 serine O-acetyltransferase                       |
| 569426  | 590255  | 20829 OXZ33844.1 | B9N55_02950 | 582150  | 583034  | -1 hypothetical protein                            |
| 569426  | 590255  | 20829            | B9N55_02955 | 583083  | 583187  | -1 hypothetical protein                            |
| 569426  | 590255  | 20829 OXZ33845.1 | B9N55_02960 | 583681  | 584769  | 1 iron ABC transporter permease                    |
| 569426  | 590255  | 20829 OXZ33846.1 | B9N55_02965 | 584759  | 585766  | 1 iron ABC transporter                             |
| 569426  | 590255  | 20829 OXZ33847.1 | B9N55_02970 | 585766  | 586773  | 1 iron ABC transporter                             |
| 569426  | 590255  | 20829 OXZ33848.1 | B9N55_02975 | 586773  | 587567  | 1 iron ABC transporter ATP-binding protein         |
| 569426  | 590255  | 20829 OXZ33849.1 | B9N55_02980 | 587970  | 588371  | 1 hypothetical protein                             |
| 569426  | 590255  | 20829            | B9N55_02985 | 588429  | 589043  | 1 hypothetical protein                             |
| 569426  | 590255  | 20829 OXZ33850.1 | B9N55_02990 | 589164  | 590255  | 1 glycerol dehydrogenase                           |
| 1088002 | 1095275 | 7273 OXZ32287.1  | B9N55_05575 | 1088002 | 1088982 | -1 recombinase XerC                                |
| 1088002 | 1095275 | 7273 OXZ32288.1  | B9N55_05580 | 1089092 | 1090267 | -1 aspartate aminotransferase                      |
| 1088002 | 1095275 | 7273 OXZ32289.1  | B9N55_05585 | 1090254 | 1091075 | -1 metal-dependent phosphoesterase                 |
| 1088002 | 1095275 | 7273 OXZ32290.1  | B9N55_05590 | 1091144 | 1092685 | -1 ribonuclease Y                                  |
| 1088002 | 1095275 | 7273 OXZ32291.1  | B9N55_05595 | 1092804 | 1093466 | -1 chromosome partitioning protein ParA            |
| 1088002 | 1095275 | 7273 OXZ32292.1  | B9N55_05600 | 1093453 | 1093692 | -1 hypothetical protein                            |
| 1088002 | 1095275 | 7273 OXZ32293.1  | B9N55_05605 | 1093692 | 1095275 | -1 exonuclease SbcC                                |
| 1293167 | 1324490 | 31323 OXZ32025.1 | B9N55_06545 | 1293167 | 1294498 | 1 endonuclease                                     |
| 1293167 | 1324490 | 31323 OXZ32026.1 | B9N55_06550 | 1294609 | 1295265 | -1 DNA-binding protein                             |
| 1293167 | 1324490 | 31323 OXZ32027.1 | B9N55_06555 | 1295309 | 1296637 | -1 helicase                                        |
| 1293167 | 1324490 | 31323 OXZ32028.1 | B9N55_06560 | 1296771 | 1298441 | -1 group II intron reverse transcriptase/maturase  |
| 1293167 | 1324490 | 31323 OXZ32029.1 | B9N55_06565 | 1298997 | 1305293 | -1 DNA helicase                                    |
| 1293167 | 1324490 | 31323 OXZ32030.1 | B9N55_06570 | 1305377 | 1306879 | -1 SIR2 family protein                             |
| 1293167 | 1324490 | 31323 OXZ32031.1 | B9N55_06575 | 1306936 | 1307874 | -1 DNA (cytosine-5-)-methyltransferase             |
| 1293167 | 1324490 | 31323 OXZ32032.1 | B9N55_06580 | 1307867 | 1309588 | -1 DNA topoisomerase III                           |
| 1293167 | 1324490 | 31323 OXZ32033.1 | B9N55_06585 | 1309678 | 1310661 | -1 hypothetical protein                            |
| 1293167 | 1324490 | 31323 OXZ32034.1 | B9N55_06590 | 1310654 | 1311265 | -1 hypothetical protein                            |
| 1293167 | 1324490 | 31323 OXZ32035.1 | B9N55_06595 | 1311384 | 1312199 | -1 bacteriocin                                     |
| 1293167 | 1324490 | 31323 OXZ32036.1 | B9N55_06600 | 1312214 | 1313797 | -1 copper amine oxidase                            |
| 1293167 | 1324490 | 31323            | B9N55_06605 | 1313787 | 1314023 | -1 hypothetical protein                            |
| 1293167 | 1324490 | 31323 OXZ32037.1 | B9N55_06610 | 1314038 | 1316617 | -1 hypothetical protein                            |
| 1293167 | 1324490 | 31323 OXZ32038.1 | B9N55_06615 | 1316625 | 1319048 | -1 conjugal transfer protein TraE                  |
| 1293167 | 1324490 | 31323 OXZ32039.1 | B9N55_06620 | 1318939 | 1319349 | -1 conjugal transfer protein                       |
| 1293167 | 1324490 | 31323 OXZ32040.1 | B9N55_06625 | 1319351 | 1319641 | -1 hypothetical protein                            |
| 1293167 | 1324490 | 31323 OXZ32041.1 | B9N55_06630 | 1319651 | 1320514 | -1 hypothetical protein                            |
| 1293167 | 1324490 | 31323 OXZ32042.1 | B9N55_06635 | 1320525 | 1320740 | -1 conjugal transfer protein                       |
| 1293167 | 1324490 | 31323 OXZ32043.1 | B9N55_06640 | 1320742 | 1321053 | -1 single-stranded DNA-binding protein             |
| 1293167 | 1324490 | 31323 OXZ32093.1 | B9N55_06645 | 1321276 | 1321893 | -1 hypothetical protein                            |
| 1293167 | 1324490 | 31323 OXZ32044.1 | B9N55_06650 | 1321961 | 1322383 | -1 polyketide cyclase                              |
| 1293167 | 1324490 | 31323 OXZ32045.1 | B9N55_06655 | 1322421 | 1322939 | -1 cytoplasmic protein                             |
| 1293167 | 1324490 | 31323            | B9N55_06660 | 1323001 | 1323468 | -1 conjugal transfer protein TraG                  |
| 1293167 | 1324490 | 31323 OXZ32046.1 | B9N55_06665 | 1323506 | 1323781 | -1 hypothetical protein                            |
| 1293167 | 1324490 | 31323 OXZ32047.1 | B9N55_06670 | 1324050 | 1324490 | -1 GNAT family N-acetyltransferase                 |
| 1305377 | 1312199 | 6822 OXZ32030.1  | B9N55_06570 | 1305377 | 1306879 | -1 SIR2 family protein                             |
| 1305377 | 1312199 | 6822 OXZ32031.1  | B9N55_06575 | 1306936 | 1307874 | -1 DNA (cytosine-5-)-methyltransferase             |
| 1305377 | 1312199 | 6822 OXZ32032.1  | B9N55_06580 | 1307867 | 1309588 | -1 DNA topoisomerase III                           |
| 1305377 | 1312199 | 6822 OXZ32033.1  | B9N55_06585 | 1309678 | 1310661 | -1 hypothetical protein                            |
| 1305377 | 1312199 | 6822 OXZ32034.1  | B9N55_06590 | 1310654 | 1311265 | -1 hypothetical protein                            |
| 1305377 | 1312199 | 6822 OXZ32035.1  | B9N55_06595 | 1311384 | 1312199 | -1 bacteriocin                                     |
| 1320742 | 1325827 | 5085 OXZ32043.1  | B9N55_06640 | 1320742 | 1321053 | -1 single-stranded DNA-binding protein             |
| 1320742 | 1325827 | 5085 OXZ32093.1  | B9N55_06645 | 1321276 | 1321893 | -1 hypothetical protein                            |
| 1320742 | 1325827 | 5085 OXZ32044.1  | B9N55_06650 | 1321961 | 1322383 | -1 polyketide cyclase                              |
| 1320742 | 1325827 | 5085 OXZ32045.1  | B9N55_06655 | 1322421 | 1322939 | -1 cytoplasmic protein                             |
| 1320742 | 1325827 | 5085             | B9N55_06660 | 1323001 | 1323468 | -1 conjugal transfer protein TraG                  |
| 1320742 | 1325827 | 5085 OXZ32046.1  | B9N55_06665 | 1323506 | 1323781 | -1 hypothetical protein                            |
| 1320742 | 1325827 | 5085 OXZ32047.1  | B9N55_06670 | 1324050 | 1324490 | -1 GNAT family N-acetyltransferase                 |

|         |         |                  |             |         |         |                                                                        |
|---------|---------|------------------|-------------|---------|---------|------------------------------------------------------------------------|
| 1320742 | 1325827 | 5085 OXZ32048.1  | B9N55_06675 | 1324550 | 1324753 | -1 hypothetical protein                                                |
| 1320742 | 1325827 | 5085 OXZ32049.1  | B9N55_06680 | 1324815 | 1325600 | -1 conjugal transfer protein TraG                                      |
| 1320742 | 1325827 | 5085 OXZ32050.1  | B9N55_06685 | 1325642 | 1325827 | -1 hypothetical protein                                                |
| 1331207 | 1344342 | 13135 OXZ32057.1 | B9N55_06720 | 1331207 | 1332949 | -1 ABC transporter ATP-binding protein                                 |
| 1331207 | 1344342 | 13135 OXZ32058.1 | B9N55_06725 | 1332951 | 1334663 | -1 ABC transporter ATP-binding protein                                 |
| 1331207 | 1344342 | 13135 OXZ32059.1 | B9N55_06730 | 1334667 | 1336082 | -1 ABC transporter ATP-binding protein                                 |
| 1331207 | 1344342 | 13135 OXZ32060.1 | B9N55_06735 | 1336095 | 1336781 | -1 cobalt transporter                                                  |
| 1331207 | 1344342 | 13135 OXZ32061.1 | B9N55_06740 | 1336782 | 1337375 | -1 hypothetical protein                                                |
| 1331207 | 1344342 | 13135 OXZ32062.1 | B9N55_06745 | 1337547 | 1338158 | -1 TetR family transcriptional regulator                               |
| 1331207 | 1344342 | 13135 OXZ32063.1 | B9N55_06750 | 1338259 | 1340085 | -1 recombinase TnpX                                                    |
| 1331207 | 1344342 | 13135 OXZ32064.1 | B9N55_06755 | 1340125 | 1341177 | -1 conjugal transfer protein TraG                                      |
| 1331207 | 1344342 | 13135 OXZ32065.1 | B9N55_06760 | 1341170 | 1341904 | -1 phage antirepressor Ant                                             |
| 1331207 | 1344342 | 13135 OXZ32066.1 | B9N55_06765 | 1341901 | 1342386 | -1 conjugal transfer protein                                           |
| 1331207 | 1344342 | 13135 OXZ32067.1 | B9N55_06770 | 1342379 | 1343206 | -1 nucleoside triphosphate hydrolase                                   |
| 1331207 | 1344342 | 13135 OXZ32068.1 | B9N55_06775 | 1343203 | 1343976 | -1 replication initiator protein A                                     |
| 1331207 | 1344342 | 13135 OXZ32069.1 | B9N55_06780 | 1344061 | 1344342 | -1 hypothetical protein                                                |
| 1684263 | 1728424 | 44161 OXZ31633.1 | B9N55_08365 | 1684263 | 1685537 | -1 hypothetical protein                                                |
| 1684263 | 1728424 | 44161 OXZ31634.1 | B9N55_08370 | 1685632 | 1687314 | -1 hypothetical protein                                                |
| 1684263 | 1728424 | 44161 OXZ31344.1 | B9N55_08375 | 1688746 | 1690407 | -1 ABC transporter permease<br>CXXX repeat peptide modification system |
| 1684263 | 1728424 | 44161 OXZ31345.1 | B9N55_08380 | 1690400 | 1690666 | -1 protein                                                             |
| 1684263 | 1728424 | 44161 OXZ31346.1 | B9N55_08385 | 1690668 | 1692857 | -1 radical SAM protein                                                 |
| 1684263 | 1728424 | 44161 OXZ31347.1 | B9N55_08390 | 1692844 | 1693026 | -1 hypothetical protein                                                |
| 1684263 | 1728424 | 44161 OXZ31348.1 | B9N55_08395 | 1693156 | 1693761 | -1 DNA-binding response regulator                                      |
| 1684263 | 1728424 | 44161 OXZ31349.1 | B9N55_08400 | 1693733 | 1695280 | -1 hypothetical protein                                                |
| 1684263 | 1728424 | 44161 OXZ31350.1 | B9N55_08405 | 1695594 | 1696688 | -1 single-stranded DNA-binding protein                                 |
| 1684263 | 1728424 | 44161 OXZ31351.1 | B9N55_08410 | 1696721 | 1707151 | -1 conjugal transfer protein                                           |
| 1684263 | 1728424 | 44161            | B9N55_08415 | 1707346 | 1707905 | -1 antibiotic ABC transporter                                          |
| 1684263 | 1728424 | 44161 OXZ31352.1 | B9N55_08420 | 1708184 | 1709890 | -1 DNA topoisomerase III                                               |
| 1684263 | 1728424 | 44161 OXZ31353.1 | B9N55_08425 | 1710307 | 1711185 | -1 bacteriocin                                                         |
| 1684263 | 1728424 | 44161 OXZ31354.1 | B9N55_08430 | 1711201 | 1713555 | -1 copper amine oxidase                                                |
| 1684263 | 1728424 | 44161 OXZ31355.1 | B9N55_08435 | 1713552 | 1713809 | -1 hypothetical protein                                                |
| 1684263 | 1728424 | 44161 OXZ31356.1 | B9N55_08440 | 1713829 | 1716792 | -1 hypothetical protein                                                |
| 1684263 | 1728424 | 44161 OXZ31357.1 | B9N55_08445 | 1716802 | 1717767 | -1 site-specific DNA-methyltransferase                                 |
| 1684263 | 1728424 | 44161 OXZ31358.1 | B9N55_08450 | 1717739 | 1720234 | -1 conjugal transfer protein TraE                                      |
| 1684263 | 1728424 | 44161 OXZ31359.1 | B9N55_08455 | 1720231 | 1720569 | -1 conjugal transfer protein                                           |
| 1684263 | 1728424 | 44161 OXZ31360.1 | B9N55_08460 | 1720569 | 1720826 | -1 hypothetical protein                                                |
| 1684263 | 1728424 | 44161 OXZ31361.1 | B9N55_08465 | 1720844 | 1721707 | -1 hypothetical protein                                                |
| 1684263 | 1728424 | 44161 OXZ31362.1 | B9N55_08470 | 1721709 | 1721924 | -1 conjugal transfer protein                                           |
| 1684263 | 1728424 | 44161 OXZ31363.1 | B9N55_08475 | 1721925 | 1722248 | -1 single-stranded DNA-binding protein                                 |
| 1684263 | 1728424 | 44161 OXZ31364.1 | B9N55_08480 | 1722438 | 1723301 | -1 CAAX protease                                                       |
| 1684263 | 1728424 | 44161 OXZ31365.1 | B9N55_08485 | 1723453 | 1725255 | -1 conjugal transfer protein TraG                                      |
| 1684263 | 1728424 | 44161 OXZ31366.1 | B9N55_08490 | 1725300 | 1725503 | -1 hypothetical protein                                                |
| 1684263 | 1728424 | 44161 OXZ31367.1 | B9N55_08495 | 1725692 | 1726183 | -1 hypothetical protein                                                |
| 1684263 | 1728424 | 44161 OXZ31368.1 | B9N55_08500 | 1726198 | 1727055 | -1 DNA replication protein                                             |
| 1684263 | 1728424 | 44161 OXZ31369.1 | B9N55_08505 | 1727070 | 1728047 | -1 replication initiator RepA                                          |
| 1684263 | 1728424 | 44161 OXZ31370.1 | B9N55_08510 | 1728134 | 1728424 | -1 hypothetical protein                                                |
| 1690400 | 1716792 | 26392 OXZ31344.1 | B9N55_08375 | 1688746 | 1690407 | -1 ABC transporter permease<br>CXXX repeat peptide modification system |
| 1690400 | 1716792 | 26392 OXZ31345.1 | B9N55_08380 | 1690400 | 1690666 | -1 protein                                                             |
| 1690400 | 1716792 | 26392 OXZ31346.1 | B9N55_08385 | 1690668 | 1692857 | -1 radical SAM protein                                                 |
| 1690400 | 1716792 | 26392 OXZ31347.1 | B9N55_08390 | 1692844 | 1693026 | -1 hypothetical protein                                                |
| 1690400 | 1716792 | 26392 OXZ31348.1 | B9N55_08395 | 1693156 | 1693761 | -1 DNA-binding response regulator                                      |
| 1690400 | 1716792 | 26392 OXZ31349.1 | B9N55_08400 | 1693733 | 1695280 | -1 hypothetical protein                                                |
| 1690400 | 1716792 | 26392 OXZ31350.1 | B9N55_08405 | 1695594 | 1696688 | -1 single-stranded DNA-binding protein                                 |
| 1690400 | 1716792 | 26392 OXZ31351.1 | B9N55_08410 | 1696721 | 1707151 | -1 conjugal transfer protein                                           |
| 1690400 | 1716792 | 26392            | B9N55_08415 | 1707346 | 1707905 | -1 antibiotic ABC transporter                                          |
| 1690400 | 1716792 | 26392 OXZ31352.1 | B9N55_08420 | 1708184 | 1709890 | -1 DNA topoisomerase III                                               |
| 1690400 | 1716792 | 26392 OXZ31353.1 | B9N55_08425 | 1710307 | 1711185 | -1 bacteriocin                                                         |
| 1690400 | 1716792 | 26392 OXZ31354.1 | B9N55_08430 | 1711201 | 1713555 | -1 copper amine oxidase                                                |
| 1690400 | 1716792 | 26392 OXZ31355.1 | B9N55_08435 | 1713552 | 1713809 | -1 hypothetical protein                                                |
| 1690400 | 1716792 | 26392 OXZ31356.1 | B9N55_08440 | 1713829 | 1716792 | -1 hypothetical protein                                                |
| 1720231 | 1728424 | 8193 OXZ31358.1  | B9N55_08450 | 1717739 | 1720234 | -1 conjugal transfer protein TraE                                      |
| 1720231 | 1728424 | 8193 OXZ31359.1  | B9N55_08455 | 1720231 | 1720569 | -1 conjugal transfer protein                                           |
| 1720231 | 1728424 | 8193 OXZ31360.1  | B9N55_08460 | 1720569 | 1720826 | -1 hypothetical protein                                                |
| 1720231 | 1728424 | 8193 OXZ31361.1  | B9N55_08465 | 1720844 | 1721707 | -1 hypothetical protein                                                |
| 1720231 | 1728424 | 8193 OXZ31362.1  | B9N55_08470 | 1721709 | 1721924 | -1 conjugal transfer protein                                           |
| 1720231 | 1728424 | 8193 OXZ31363.1  | B9N55_08475 | 1721925 | 1722248 | -1 single-stranded DNA-binding protein                                 |
| 1720231 | 1728424 | 8193 OXZ31364.1  | B9N55_08480 | 1722438 | 1723301 | -1 CAAX protease                                                       |
| 1720231 | 1728424 | 8193 OXZ31365.1  | B9N55_08485 | 1723453 | 1725255 | -1 conjugal transfer protein TraG                                      |
| 1720231 | 1728424 | 8193 OXZ31366.1  | B9N55_08490 | 1725300 | 1725503 | -1 hypothetical protein                                                |
| 1720231 | 1728424 | 8193 OXZ31367.1  | B9N55_08495 | 1725692 | 1726183 | -1 hypothetical protein                                                |
| 1720231 | 1728424 | 8193 OXZ31368.1  | B9N55_08500 | 1726198 | 1727055 | -1 DNA replication protein                                             |
| 1720231 | 1728424 | 8193 OXZ31369.1  | B9N55_08505 | 1727070 | 1728047 | -1 replication initiator RepA                                          |
| 1720231 | 1728424 | 8193 OXZ31370.1  | B9N55_08510 | 1728134 | 1728424 | -1 hypothetical protein                                                |
| 1799490 | 1811368 | 11878 OXZ31185.1 | B9N55_08875 | 1799490 | 1800239 | -1 phosphorylase                                                       |
| 1799490 | 1811368 | 11878            | B9N55_08880 | 1800273 | 1800602 | -1 hypothetical protein                                                |
| 1799490 | 1811368 | 11878 OXZ31186.1 | B9N55_08885 | 1800703 | 1801284 | -1 hypothetical protein                                                |
| 1799490 | 1811368 | 11878 OXZ31187.1 | B9N55_08890 | 1801737 | 1802165 | -1 hypothetical protein                                                |
| 1799490 | 1811368 | 11878 OXZ31188.1 | B9N55_08895 | 1802314 | 1803678 | -1 ABC transporter ATP-binding protein                                 |
| 1799490 | 1811368 | 11878 OXZ31189.1 | B9N55_08900 | 1803672 | 1804361 | -1 cobalt ABC transporter permease                                     |
| 1799490 | 1811368 | 11878 OXZ31190.1 | B9N55_08905 | 1804361 | 1804942 | -1 hypothetical protein                                                |
| 1799490 | 1811368 | 11878 OXZ31024.1 | B9N55_09060 | 1806353 | 1808938 | -1 ATP-dependent chaperone ClpB                                        |
| 1799490 | 1811368 | 11878 OXZ31025.1 | B9N55_09065 | 1808957 | 1809901 | -1 heat-shock protein                                                  |
| 1799490 | 1811368 | 11878 OXZ31026.1 | B9N55_09070 | 1810010 | 1810675 | -1 nitroreductase                                                      |
| 1799490 | 1811368 | 11878 OXZ31027.1 | B9N55_09075 | 1810829 | 1811368 | -1 RNA polymerase subunit sigma                                        |
| 1897911 | 1902891 | 4980 OXZ30960.1  | B9N55_09420 | 1897911 | 1897998 | -1 hypothetical protein                                                |

|         |         |                  |             |         |         |                                                   |
|---------|---------|------------------|-------------|---------|---------|---------------------------------------------------|
| 1897911 | 1902891 | 4980 OXZ30822.1  | B9N55_09480 | 1901495 | 1902157 | -1 hypothetical protein                           |
| 1897911 | 1902891 | 4980 OXZ30823.1  | B9N55_09485 | 1902352 | 1902891 | -1 transposase                                    |
| 1914240 | 1959903 | 45663 OXZ30881.1 | B9N55_09450 | 1914240 | 1914451 | -1 translation elongation factor Tu               |
| 1914240 | 1959903 | 45663 OXZ31113.1 | B9N55_08910 | 1915452 | 1917072 | -1 hypothetical protein                           |
| 1914240 | 1959903 | 45663 OXZ31114.1 | B9N55_08915 | 1917069 | 1918730 | -1 hypothetical protein                           |
| 1914240 | 1959903 | 45663 OXZ31115.1 | B9N55_08920 | 1918731 | 1920428 | -1 hypothetical protein                           |
| 1914240 | 1959903 | 45663 OXZ31116.1 | B9N55_08925 | 1920448 | 1921431 | -1 3-deoxy-7-phosphoheptulonate synthase          |
| 1914240 | 1959903 | 45663 OXZ31117.1 | B9N55_08930 | 1921436 | 1921774 | -1 dehydroquinase class II                        |
| 1914240 | 1959903 | 45663            | B9N55_08935 | 1921773 | 1922009 | -1 chorismate synthase                            |
| 1914240 | 1959903 | 45663            | B9N55_08940 | 1921996 | 1923290 | -1 3-phosphoshikimate 1-carboxyvinyltransferase   |
| 1914240 | 1959903 | 45663 OXZ31118.1 | B9N55_08945 | 1923287 | 1924333 | -1 3-dehydroquinase synthase                      |
| 1914240 | 1959903 | 45663 OXZ31119.1 | B9N55_08950 | 1924337 | 1924723 | -1 salicylate synthase                            |
| 1914240 | 1959903 | 45663 OXZ31120.1 | B9N55_08955 | 1924888 | 1925148 | -1 hypothetical protein                           |
| 1914240 | 1959903 | 45663 OXZ31121.1 | B9N55_08960 | 1925141 | 1925569 | -1 hypothetical protein                           |
| 1914240 | 1959903 | 45663 OXZ31122.1 | B9N55_08965 | 1925892 | 1926284 | -1 transcriptional regulator                      |
| 1914240 | 1959903 | 45663 OXZ31123.1 | B9N55_08970 | 1926721 | 1927089 | 1 plasmid mobilization relaxosome protein MobC    |
| 1914240 | 1959903 | 45663 OXZ31124.1 | B9N55_08975 | 1927089 | 1928459 | 1 endonuclease                                    |
| 1914240 | 1959903 | 45663 OXZ31125.1 | B9N55_08980 | 1928518 | 1929264 | -1 ABC transporter permease                       |
| 1914240 | 1959903 | 45663 OXZ31126.1 | B9N55_08985 | 1929279 | 1929971 | -1 ABC transporter permease                       |
| 1914240 | 1959903 | 45663 OXZ31127.1 | B9N55_08990 | 1929973 | 1930887 | -1 bacitracin ABC transporter ATP-binding protein |
| 1914240 | 1959903 | 45663 OXZ31128.1 | B9N55_08995 | 1930902 | 1932059 | -1 hypothetical protein                           |
| 1914240 | 1959903 | 45663 OXZ31129.1 | B9N55_09000 | 1932063 | 1933370 | -1 hypothetical protein                           |
| 1914240 | 1959903 | 45663 OXZ31130.1 | B9N55_09005 | 1934009 | 1934440 | -1 hypothetical protein                           |
| 1914240 | 1959903 | 45663 OXZ31131.1 | B9N55_09010 | 1934453 | 1934716 | -1 hypothetical protein                           |
| 1914240 | 1959903 | 45663 OXZ31132.1 | B9N55_09015 | 1934710 | 1935279 | -1 hypothetical protein                           |
| 1914240 | 1959903 | 45663            | B9N55_09020 | 1935618 | 1935941 | 1 relaxase                                        |
| 1914240 | 1959903 | 45663 OXZ31133.1 | B9N55_09025 | 1936062 | 1936409 | -1 DUF3784 domain-containing protein              |
| 1914240 | 1959903 | 45663 OXZ31134.1 | B9N55_09030 | 1936417 | 1937793 | -1 hypothetical protein                           |
| 1914240 | 1959903 | 45663 OXZ31135.1 | B9N55_09035 | 1937803 | 1938597 | -1 hypothetical protein                           |
| 1914240 | 1959903 | 45663 OXZ31136.1 | B9N55_09040 | 1938587 | 1939453 | -1 hypothetical protein                           |
| 1914240 | 1959903 | 45663 OXZ31137.1 | B9N55_09045 | 1939635 | 1940819 | -1 hypothetical protein                           |
| 1914240 | 1959903 | 45663 OXZ31138.1 | B9N55_09050 | 1940947 | 1941279 | -1 hypothetical protein                           |
| 1914240 | 1959903 | 45663 OXZ31139.1 | B9N55_09055 | 1941537 | 1941746 | -1 hypothetical protein                           |
| 1914240 | 1959903 | 45663 OXZ30824.1 | B9N55_09470 | 1948165 | 1948863 | -1 hypothetical protein                           |
| 1914240 | 1959903 | 45663 OXZ30825.1 | B9N55_09475 | 1949022 | 1949561 | -1 transposase                                    |
| 1914240 | 1959903 | 45663 OXZ30779.1 | B9N55_09500 | 1950607 | 1951809 | -1 hypothetical protein                           |
| 1914240 | 1959903 | 45663 OXZ30778.1 | B9N55_09505 | 1952810 | 1953858 | -1 IS110 family transposase                       |
| 1914240 | 1959903 | 45663 OXZ30943.1 | B9N55_09440 | 1955001 | 1959903 | -1 hypothetical protein                           |
| 1915452 | 1948863 | 33411 OXZ31113.1 | B9N55_08910 | 1915452 | 1917072 | -1 hypothetical protein                           |
| 1915452 | 1948863 | 33411 OXZ31114.1 | B9N55_08915 | 1917069 | 1918730 | -1 hypothetical protein                           |
| 1915452 | 1948863 | 33411 OXZ31115.1 | B9N55_08920 | 1918731 | 1920428 | -1 hypothetical protein                           |
| 1915452 | 1948863 | 33411 OXZ31116.1 | B9N55_08925 | 1920448 | 1921431 | -1 3-deoxy-7-phosphoheptulonate synthase          |
| 1915452 | 1948863 | 33411 OXZ31117.1 | B9N55_08930 | 1921436 | 1921774 | -1 dehydroquinase class II                        |
| 1915452 | 1948863 | 33411            | B9N55_08935 | 1921773 | 1922009 | -1 chorismate synthase                            |
| 1915452 | 1948863 | 33411            | B9N55_08940 | 1921996 | 1923290 | -1 3-phosphoshikimate 1-carboxyvinyltransferase   |
| 1915452 | 1948863 | 33411 OXZ31118.1 | B9N55_08945 | 1923287 | 1924333 | -1 3-dehydroquinase synthase                      |
| 1915452 | 1948863 | 33411 OXZ31119.1 | B9N55_08950 | 1924337 | 1924723 | -1 salicylate synthase                            |
| 1915452 | 1948863 | 33411 OXZ31120.1 | B9N55_08955 | 1924888 | 1925148 | -1 hypothetical protein                           |
| 1915452 | 1948863 | 33411 OXZ31121.1 | B9N55_08960 | 1925141 | 1925569 | -1 hypothetical protein                           |
| 1915452 | 1948863 | 33411 OXZ31122.1 | B9N55_08965 | 1925892 | 1926284 | -1 transcriptional regulator                      |
| 1915452 | 1948863 | 33411 OXZ31123.1 | B9N55_08970 | 1926721 | 1927089 | 1 plasmid mobilization relaxosome protein MobC    |
| 1915452 | 1948863 | 33411 OXZ31124.1 | B9N55_08975 | 1927089 | 1928459 | 1 endonuclease                                    |
| 1915452 | 1948863 | 33411 OXZ31125.1 | B9N55_08980 | 1928518 | 1929264 | -1 ABC transporter permease                       |
| 1915452 | 1948863 | 33411 OXZ31126.1 | B9N55_08985 | 1929279 | 1929971 | -1 ABC transporter permease                       |
| 1915452 | 1948863 | 33411 OXZ31127.1 | B9N55_08990 | 1929973 | 1930887 | -1 bacitracin ABC transporter ATP-binding protein |
| 1915452 | 1948863 | 33411 OXZ31128.1 | B9N55_08995 | 1930902 | 1932059 | -1 hypothetical protein                           |
| 1915452 | 1948863 | 33411 OXZ31129.1 | B9N55_09000 | 1932063 | 1933370 | -1 hypothetical protein                           |
| 1915452 | 1948863 | 33411 OXZ31130.1 | B9N55_09005 | 1934009 | 1934440 | -1 hypothetical protein                           |
| 1915452 | 1948863 | 33411 OXZ31131.1 | B9N55_09010 | 1934453 | 1934716 | -1 hypothetical protein                           |
| 1915452 | 1948863 | 33411 OXZ31132.1 | B9N55_09015 | 1934710 | 1935279 | -1 hypothetical protein                           |
| 1915452 | 1948863 | 33411            | B9N55_09020 | 1935618 | 1935941 | 1 relaxase                                        |
| 1915452 | 1948863 | 33411 OXZ31133.1 | B9N55_09025 | 1936062 | 1936409 | -1 DUF3784 domain-containing protein              |
| 1915452 | 1948863 | 33411 OXZ31134.1 | B9N55_09030 | 1936417 | 1937793 | -1 hypothetical protein                           |
| 1915452 | 1948863 | 33411 OXZ31135.1 | B9N55_09035 | 1937803 | 1938597 | -1 hypothetical protein                           |
| 1915452 | 1948863 | 33411 OXZ31136.1 | B9N55_09040 | 1938587 | 1939453 | -1 hypothetical protein                           |
| 1915452 | 1948863 | 33411 OXZ31137.1 | B9N55_09045 | 1939635 | 1940819 | -1 hypothetical protein                           |
| 1915452 | 1948863 | 33411 OXZ31138.1 | B9N55_09050 | 1940947 | 1941279 | -1 hypothetical protein                           |
| 1915452 | 1948863 | 33411 OXZ31139.1 | B9N55_09055 | 1941537 | 1941746 | -1 hypothetical protein                           |
| 1915452 | 1948863 | 33411 OXZ30824.1 | B9N55_09470 | 1948165 | 1948863 | -1 hypothetical protein                           |



**Table S3G: Predicted genomic islands in the genome of "F. nericia" 12T306**

Shown are genes of genomic islands predicted by IslandViewer4

| Island start | Island end | Length | Gene name  | Locus       | Gene start | Gene end | Strand | Product                                        |
|--------------|------------|--------|------------|-------------|------------|----------|--------|------------------------------------------------|
| 125213       | 131694     | 6481   | OXZ36396.1 | B9N54_00540 | 125213     | 126550   | 1      | replicative DNA helicase                       |
| 125213       | 131694     | 6481   | OXZ36397.1 | B9N54_00545 | 126547     | 127110   | 1      | GNAT family N-acetyltransferase                |
| 125213       | 131694     | 6481   | OXZ36398.1 | B9N54_00550 | 127115     | 127873   | 1      | DNA replication protein                        |
| 125213       | 131694     | 6481   | OXZ36399.1 | B9N54_00555 | 127876     | 128853   | 1      | DNA replication protein DnaC                   |
| 125213       | 131694     | 6481   | OXZ36400.1 | B9N54_00560 | 128850     | 129494   | 1      | NAD(P)H-hydrate epimerase                      |
| 125213       | 131694     | 6481   | OXZ36401.1 | B9N54_00565 | 130482     | 131024   | 1      | ECF transporter S component                    |
| 125213       | 131694     | 6481   | OXZ36402.1 | B9N54_00570 | 131008     | 131694   | 1      | radical SAM protein                            |
| 229146       | 236132     | 6986   | OXZ36325.1 | B9N54_01130 | 229146     | 229787   | -1     | hemolysin III                                  |
| 229146       | 236132     | 6986   | OXZ36326.1 | B9N54_01135 | 229940     | 230443   | 1      | acetyltransferase                              |
| 229146       | 236132     | 6986   | OXZ36327.1 | B9N54_01140 | 230443     | 231177   | 1      | hydrolase                                      |
| 229146       | 236132     | 6986   | OXZ36328.1 | B9N54_01145 | 232657     | 233232   | 1      | cell filamentation protein Fic                 |
| 229146       | 236132     | 6986   | OXZ36329.1 | B9N54_01150 | 234109     | 234351   | -1     | prevent-host-death protein                     |
| 229146       | 236132     | 6986   | OXZ36330.1 | B9N54_01155 | 234514     | 235122   | -1     | hypothetical protein                           |
| 229146       | 236132     | 6986   | OXZ36331.1 | B9N54_01160 | 235206     | 236132   | -1     | hypothetical protein                           |
| 280334       | 298282     | 17948  | OXZ36371.1 | B9N54_01370 | 280334     | 281362   | 1      | carboxypeptidase                               |
| 280334       | 298282     | 17948  | OXZ36372.1 | B9N54_01375 | 281715     | 282143   | 1      | hypothetical protein                           |
| 280334       | 298282     | 17948  | OXZ36373.1 | B9N54_01380 | 282297     | 283046   | 1      | phosphorylase                                  |
| 280334       | 298282     | 17948  | OXZ36374.1 | B9N54_01385 | 283352     | 284002   | 1      | hypothetical protein                           |
| 280334       | 298282     | 17948  | OXZ36375.1 | B9N54_01390 | 284842     | 285633   | 1      | CPBP family intramembrane metalloprotease      |
| 280334       | 298282     | 17948  | OXZ36376.1 | B9N54_01395 | 285695     | 286162   | 1      | abortive infection protein                     |
| 280334       | 298282     | 17948  |            | B9N54_01400 | 286395     | 286911   | 1      | FRG domain-containing protein                  |
| 280334       | 298282     | 17948  | OXZ36377.1 | B9N54_01405 | 286959     | 287513   | 1      | hypothetical protein                           |
| 280334       | 298282     | 17948  |            | B9N54_01410 | 287548     | 287942   | 1      | hypothetical protein                           |
| 280334       | 298282     | 17948  | OXZ36378.1 | B9N54_01415 | 288232     | 289779   | 1      | hypothetical protein                           |
| 280334       | 298282     | 17948  | OXZ36379.1 | B9N54_01420 | 289751     | 290356   | 1      | DNA-binding response regulator                 |
| 280334       | 298282     | 17948  | OXZ36380.1 | B9N54_01425 | 290535     | 290939   | 1      | hypothetical protein                           |
| 280334       | 298282     | 17948  | OXZ36381.1 | B9N54_01430 | 290994     | 291878   | 1      | multidrug ABC transporter ATP-binding protein  |
| 280334       | 298282     | 17948  | OXZ36382.1 | B9N54_01435 | 291862     | 292587   | 1      | hypothetical protein                           |
| 280334       | 298282     | 17948  |            | B9N54_01440 | 292680     | 292882   | 1      | hypothetical protein                           |
| 280334       | 298282     | 17948  | OXZ36383.1 | B9N54_01445 | 293661     | 294560   | 1      | bacitracin ABC transporter ATP-binding protein |
| 280334       | 298282     | 17948  | OXZ36384.1 | B9N54_01450 | 294557     | 295399   | 1      | ABC transporter permease                       |
| 280334       | 298282     | 17948  |            | B9N54_01455 | 295465     | 295956   | 1      | ABC transporter permease                       |
| 280334       | 298282     | 17948  | OXZ36385.1 | B9N54_01460 | 295970     | 296236   | 1      | hypothetical protein                           |
| 280334       | 298282     | 17948  | OXZ36386.1 | B9N54_01465 | 296310     | 296704   | -1     | relaxase                                       |
| 280334       | 298282     | 17948  | OXZ36136.1 | B9N54_01470 | 297705     | 297829   | -1     | transposase                                    |
| 280334       | 298282     | 17948  | OXZ36137.1 | B9N54_01475 | 297893     | 298282   | -1     | hypothetical protein                           |
| 281715       | 298282     | 16567  | OXZ36372.1 | B9N54_01375 | 281715     | 282143   | 1      | hypothetical protein                           |
| 281715       | 298282     | 16567  | OXZ36373.1 | B9N54_01380 | 282297     | 283046   | 1      | phosphorylase                                  |
| 281715       | 298282     | 16567  | OXZ36374.1 | B9N54_01385 | 283352     | 284002   | 1      | hypothetical protein                           |
| 281715       | 298282     | 16567  | OXZ36375.1 | B9N54_01390 | 284842     | 285633   | 1      | CPBP family intramembrane metalloprotease      |
| 281715       | 298282     | 16567  | OXZ36376.1 | B9N54_01395 | 285695     | 286162   | 1      | abortive infection protein                     |
| 281715       | 298282     | 16567  |            | B9N54_01400 | 286395     | 286911   | 1      | FRG domain-containing protein                  |
| 281715       | 298282     | 16567  | OXZ36377.1 | B9N54_01405 | 286959     | 287513   | 1      | hypothetical protein                           |
| 281715       | 298282     | 16567  |            | B9N54_01410 | 287548     | 287942   | 1      | hypothetical protein                           |
| 281715       | 298282     | 16567  | OXZ36378.1 | B9N54_01415 | 288232     | 289779   | 1      | hypothetical protein                           |
| 281715       | 298282     | 16567  | OXZ36379.1 | B9N54_01420 | 289751     | 290356   | 1      | DNA-binding response regulator                 |
| 281715       | 298282     | 16567  | OXZ36380.1 | B9N54_01425 | 290535     | 290939   | 1      | hypothetical protein                           |
| 281715       | 298282     | 16567  | OXZ36381.1 | B9N54_01430 | 290994     | 291878   | 1      | multidrug ABC transporter ATP-binding protein  |
| 281715       | 298282     | 16567  | OXZ36382.1 | B9N54_01435 | 291862     | 292587   | 1      | hypothetical protein                           |
| 281715       | 298282     | 16567  |            | B9N54_01440 | 292680     | 292882   | 1      | hypothetical protein                           |
| 281715       | 298282     | 16567  | OXZ36383.1 | B9N54_01445 | 293661     | 294560   | 1      | bacitracin ABC transporter ATP-binding protein |
| 281715       | 298282     | 16567  | OXZ36384.1 | B9N54_01450 | 294557     | 295399   | 1      | ABC transporter permease                       |
| 281715       | 298282     | 16567  |            | B9N54_01455 | 295465     | 295956   | 1      | ABC transporter permease                       |
| 281715       | 298282     | 16567  | OXZ36385.1 | B9N54_01460 | 295970     | 296236   | 1      | hypothetical protein                           |
| 281715       | 298282     | 16567  | OXZ36386.1 | B9N54_01465 | 296310     | 296704   | -1     | relaxase                                       |
| 281715       | 298282     | 16567  | OXZ36136.1 | B9N54_01470 | 297705     | 297829   | -1     | transposase                                    |
| 281715       | 298282     | 16567  | OXZ36137.1 | B9N54_01475 | 297893     | 298282   | -1     | hypothetical protein                           |
| 454821       | 459306     | 4485   | OXZ36294.1 | B9N54_02190 | 454821     | 455048   | 1      | mobilization protein                           |
| 454821       | 459306     | 4485   | OXZ36273.1 | B9N54_02195 | 455377     | 455802   | -1     | MarR family transcriptional regulator          |
| 454821       | 459306     | 4485   | OXZ36274.1 | B9N54_02200 | 455804     | 456178   | -1     | hypothetical protein                           |
| 454821       | 459306     | 4485   |            | B9N54_02205 | 456629     | 456724   | -1     | glutamyl-tRNA amidotransferase                 |
| 454821       | 459306     | 4485   | OXZ36275.1 | B9N54_02210 | 456938     | 457369   | -1     | transcriptional regulator                      |
| 454821       | 459306     | 4485   | OXZ36276.1 | B9N54_02215 | 457631     | 457825   | 1      | hypothetical protein                           |
| 454821       | 459306     | 4485   | OXZ36277.1 | B9N54_02220 | 457827     | 458951   | 1      | site-specific integrase                        |
| 454821       | 459306     | 4485   | OXZ36278.1 | B9N54_02225 | 458944     | 459306   | 1      | hypothetical protein                           |
| 455377       | 468722     | 13345  | OXZ36273.1 | B9N54_02195 | 455377     | 455802   | -1     | MarR family transcriptional regulator          |
| 455377       | 468722     | 13345  | OXZ36274.1 | B9N54_02200 | 455804     | 456178   | -1     | hypothetical protein                           |
| 455377       | 468722     | 13345  |            | B9N54_02205 | 456629     | 456724   | -1     | glutamyl-tRNA amidotransferase                 |
| 455377       | 468722     | 13345  | OXZ36275.1 | B9N54_02210 | 456938     | 457369   | -1     | transcriptional regulator                      |
| 455377       | 468722     | 13345  | OXZ36276.1 | B9N54_02215 | 457631     | 457825   | 1      | hypothetical protein                           |
| 455377       | 468722     | 13345  | OXZ36277.1 | B9N54_02220 | 457827     | 458951   | 1      | site-specific integrase                        |
| 455377       | 468722     | 13345  | OXZ36278.1 | B9N54_02225 | 458944     | 459306   | 1      | hypothetical protein                           |
| 455377       | 468722     | 13345  | OXZ36279.1 | B9N54_02230 | 459424     | 460914   | 1      | virulence-associated protein E                 |
| 455377       | 468722     | 13345  | OXZ36280.1 | B9N54_02235 | 461243     | 461605   | 1      | plasmid mobilization relaxosome protein MobC   |
| 455377       | 468722     | 13345  | OXZ36281.1 | B9N54_02240 | 461612     | 461860   | 1      | hypothetical protein                           |
| 455377       | 468722     | 13345  | OXZ36295.1 | B9N54_02245 | 461947     | 462342   | 1      | hypothetical protein                           |
| 455377       | 468722     | 13345  | OXZ36282.1 | B9N54_02250 | 462352     | 463794   | 1      | hypothetical protein                           |
| 455377       | 468722     | 13345  | OXZ36283.1 | B9N54_02255 | 463886     | 464056   | 1      | XRE family transcriptional regulator           |
| 455377       | 468722     | 13345  | OXZ36284.1 | B9N54_02260 | 464147     | 464470   | 1      | mobilization protein                           |

|         |         |                  |             |         |         |                                                   |
|---------|---------|------------------|-------------|---------|---------|---------------------------------------------------|
| 455377  | 468722  | 13345 OXZ36285.1 | B9N54_02265 | 464472  | 464711  | 1 hypothetical protein                            |
| 455377  | 468722  | 13345 OXZ36286.1 | B9N54_02270 | 464735  | 467233  | -1 ABC transporter permease                       |
| 455377  | 468722  | 13345 OXZ36287.1 | B9N54_02275 | 467220  | 467909  | -1 peptide ABC transporter ATP-binding protein    |
| 455377  | 468722  | 13345 OXZ36288.1 | B9N54_02280 | 468185  | 468722  | 1 IS110 family transposase                        |
| 461243  | 468722  | 7479 OXZ36280.1  | B9N54_02235 | 461243  | 461605  | 1 plasmid mobilization relaxosome protein MobC    |
| 461243  | 468722  | 7479 OXZ36281.1  | B9N54_02240 | 461612  | 461860  | 1 hypothetical protein                            |
| 461243  | 468722  | 7479 OXZ36295.1  | B9N54_02245 | 461947  | 462342  | 1 hypothetical protein                            |
| 461243  | 468722  | 7479 OXZ36282.1  | B9N54_02250 | 462352  | 463794  | 1 hypothetical protein                            |
| 461243  | 468722  | 7479 OXZ36283.1  | B9N54_02255 | 463886  | 464056  | 1 XRE family transcriptional regulator            |
| 461243  | 468722  | 7479 OXZ36284.1  | B9N54_02260 | 464147  | 464470  | 1 mobilization protein                            |
| 461243  | 468722  | 7479 OXZ36285.1  | B9N54_02265 | 464472  | 464711  | 1 hypothetical protein                            |
| 461243  | 468722  | 7479 OXZ36286.1  | B9N54_02270 | 464735  | 467233  | -1 ABC transporter permease                       |
| 461243  | 468722  | 7479 OXZ36287.1  | B9N54_02275 | 467220  | 467909  | -1 peptide ABC transporter ATP-binding protein    |
| 461243  | 468722  | 7479 OXZ36288.1  | B9N54_02280 | 468185  | 468722  | 1 IS110 family transposase                        |
| 872345  | 880377  | 8032 OXZ35246.1  | B9N54_04320 | 872345  | 873178  | 1 hypothetical protein                            |
| 872345  | 880377  | 8032 OXZ35247.1  | B9N54_04325 | 873299  | 873718  | -1 flavodoxin                                     |
| 872345  | 880377  | 8032 OXZ35248.1  | B9N54_04330 | 873722  | 874267  | -1 hypothetical protein                           |
| 872345  | 880377  | 8032 OXZ35249.1  | B9N54_04335 | 874473  | 874697  | 1 preprotein translocase subunit SecG             |
| 872345  | 880377  | 8032 OXZ35250.1  | B9N54_04340 | 874722  | 876734  | 1 sodium-translocating pyrophosphatase            |
| 872345  | 880377  | 8032 OXZ35251.1  | B9N54_04345 | 876871  | 876995  | 1 transposase                                     |
| 872345  | 880377  | 8032 OXZ34999.1  | B9N54_04350 | 877996  | 878159  | 1 hypothetical protein                            |
| 872345  | 880377  | 8032 OXZ35000.1  | B9N54_04355 | 878282  | 879610  | 1 hemolysin                                       |
| 872345  | 880377  | 8032 OXZ35001.1  | B9N54_04360 | 879622  | 880377  | 1 type I methionyl aminopeptidase                 |
| 895090  | 901022  | 5932 OXZ35013.1  | B9N54_04435 | 895090  | 895281  | 1 50S ribosomal protein L35                       |
| 895090  | 901022  | 5932 OXZ35014.1  | B9N54_04440 | 895300  | 895653  | 1 50S ribosomal protein L20                       |
| 895090  | 901022  | 5932 OXZ35015.1  | B9N54_04445 | 895685  | 895960  | -1 hypothetical protein                           |
| 895090  | 901022  | 5932 OXZ35016.1  | B9N54_04450 | 895960  | 896577  | -1 recombinase RecX                               |
| 895090  | 901022  | 5932 OXZ35017.1  | B9N54_04455 | 896766  | 897005  | 1 hypothetical protein                            |
| 895090  | 901022  | 5932 OXZ35018.1  | B9N54_04460 | 897014  | 898090  | 1 phosphoesterase                                 |
| 895090  | 901022  | 5932 OXZ35019.1  | B9N54_04465 | 898087  | 900339  | 1 DNA repair protein Rad50                        |
| 895090  | 901022  | 5932 OXZ35020.1  | B9N54_04470 | 900342  | 901022  | 1 serine/threonine protein phosphatase            |
| 949309  | 953561  | 4252 OXZ34685.1  | B9N54_04705 | 949309  | 949935  | -1 LexA repressor                                 |
| 949309  | 953561  | 4252 OXZ34686.1  | B9N54_04710 | 950110  | 950421  | 1 peptidoglycan-binding protein LysM              |
| 949309  | 953561  | 4252 OXZ34687.1  | B9N54_04715 | 950497  | 951477  | -1 recombinase XerC                               |
| 949309  | 953561  | 4252 OXZ34688.1  | B9N54_04720 | 951587  | 952753  | -1 aspartate aminotransferase                     |
| 949309  | 953561  | 4252 OXZ34689.1  | B9N54_04725 | 952740  | 953561  | -1 metal-dependent phosphoesterase                |
| 1135201 | 1177204 | 42003 OXZ33900.1 | B9N54_05575 | 1135201 | 1136436 | -1 site-specific integrase                        |
| 1135201 | 1177204 | 42003 OXZ33901.1 | B9N54_05580 | 1136514 | 1136723 | -1 excisionase                                    |
| 1135201 | 1177204 | 42003 OXZ33902.1 | B9N54_05585 | 1137159 | 1137569 | -1 RNA polymerase subunit sigma                   |
| 1135201 | 1177204 | 42003 OXZ33903.1 | B9N54_05590 | 1137791 | 1139212 | -1 ABC transporter                                |
| 1135201 | 1177204 | 42003 OXZ33910.1 | B9N54_05595 | 1139200 | 1139889 | -1 ABC transporter permease                       |
| 1135201 | 1177204 | 42003 OXZ33904.1 | B9N54_05600 | 1139882 | 1140472 | -1 hypothetical protein                           |
| 1135201 | 1177204 | 42003 OXZ33905.1 | B9N54_05605 | 1140483 | 1142216 | -1 multidrug ABC transporter ATP-binding protein  |
| 1135201 | 1177204 | 42003 OXZ33906.1 | B9N54_05610 | 1142218 | 1143948 | -1 ABC transporter ATP-binding protein            |
| 1135201 | 1177204 | 42003 OXZ33907.1 | B9N54_05615 | 1144006 | 1144641 | -1 TetR family transcriptional regulator          |
| 1135201 | 1177204 | 42003 OXZ33673.1 | B9N54_05620 | 1146067 | 1146423 | 1 plasmid mobilization relaxosome protein MobC    |
| 1135201 | 1177204 | 42003 OXZ33674.1 | B9N54_05625 | 1146425 | 1147488 | 1 endonuclease                                    |
| 1135201 | 1177204 | 42003 OXZ33647.1 | B9N54_05630 | 1148554 | 1148883 | 1 relaxase                                        |
| 1135201 | 1177204 | 42003 OXZ33581.1 | B9N54_05635 | 1148928 | 1149680 | -1 ABC transporter permease                       |
| 1135201 | 1177204 | 42003 OXZ33582.1 | B9N54_05640 | 1149681 | 1150412 | -1 ABC transporter permease                       |
| 1135201 | 1177204 | 42003 OXZ33583.1 | B9N54_05645 | 1150405 | 1151328 | -1 bacitracin ABC transporter ATP-binding protein |
| 1135201 | 1177204 | 42003 OXZ33584.1 | B9N54_05650 | 1151343 | 1152110 | -1 ABC transporter permease                       |
| 1135201 | 1177204 | 42003 OXZ33585.1 | B9N54_05655 | 1152230 | 1153138 | -1 two-component sensor histidine kinase          |
| 1135201 | 1177204 | 42003 OXZ33586.1 | B9N54_05660 | 1153142 | 1153840 | -1 DNA-binding response regulator                 |
| 1135201 | 1177204 | 42003 OXZ33587.1 | B9N54_05665 | 1153861 | 1154073 | -1 transcriptional regulator                      |
| 1135201 | 1177204 | 42003 OXZ33588.1 | B9N54_05670 | 1154397 | 1155056 | -1 DNA-binding protein                            |
| 1135201 | 1177204 | 42003 OXZ33589.1 | B9N54_05675 | 1155100 | 1162743 | -1 DNA helicase                                   |
| 1135201 | 1177204 | 42003 OXZ33590.1 | B9N54_05680 | 1162730 | 1163695 | -1 DNA (cytosine-5-)-methyltransferase            |
| 1135201 | 1177204 | 42003 OXZ33591.1 | B9N54_05685 | 1163688 | 1165409 | -1 DNA topoisomerase III                          |
| 1135201 | 1177204 | 42003 OXZ33592.1 | B9N54_05690 | 1165516 | 1166934 | -1 AAA family ATPase                              |
| 1135201 | 1177204 | 42003 OXZ33593.1 | B9N54_05695 | 1167015 | 1167884 | -1 bacteriocin                                    |
| 1135201 | 1177204 | 42003 OXZ33594.1 | B9N54_05700 | 1167899 | 1169482 | -1 copper amine oxidase                           |
| 1135201 | 1177204 | 42003 OXZ33595.1 | B9N54_05705 | 1169469 | 1169708 | -1 hypothetical protein                           |
| 1135201 | 1177204 | 42003 OXZ33596.1 | B9N54_05710 | 1169723 | 1172302 | -1 hypothetical protein                           |
| 1135201 | 1177204 | 42003 OXZ33648.1 | B9N54_05715 | 1172310 | 1174553 | -1 conjugal transfer protein TraE                 |
| 1135201 | 1177204 | 42003 OXZ33597.1 | B9N54_05720 | 1174624 | 1175034 | -1 conjugal transfer protein                      |
| 1135201 | 1177204 | 42003 OXZ33598.1 | B9N54_05725 | 1175036 | 1175326 | -1 hypothetical protein                           |
| 1135201 | 1177204 | 42003 OXZ33599.1 | B9N54_05730 | 1175336 | 1176199 | -1 hypothetical protein                           |
| 1135201 | 1177204 | 42003 OXZ33600.1 | B9N54_05735 | 1176210 | 1176425 | -1 conjugal transfer protein                      |
| 1135201 | 1177204 | 42003 OXZ33601.1 | B9N54_05740 | 1176427 | 1176738 | -1 single-stranded DNA-binding protein            |
| 1135201 | 1177204 | 42003 OXZ33602.1 | B9N54_05745 | 1176929 | 1177204 | -1 hypothetical protein                           |
| 1136514 | 1146423 | 9909 OXZ33901.1  | B9N54_05580 | 1136514 | 1136723 | -1 excisionase                                    |
| 1136514 | 1146423 | 9909 OXZ33902.1  | B9N54_05585 | 1137159 | 1137569 | -1 RNA polymerase subunit sigma                   |
| 1136514 | 1146423 | 9909 OXZ33903.1  | B9N54_05590 | 1137791 | 1139212 | -1 ABC transporter                                |
| 1136514 | 1146423 | 9909 OXZ33910.1  | B9N54_05595 | 1139200 | 1139889 | -1 ABC transporter permease                       |
| 1136514 | 1146423 | 9909 OXZ33904.1  | B9N54_05600 | 1139882 | 1140472 | -1 hypothetical protein                           |
| 1136514 | 1146423 | 9909 OXZ33905.1  | B9N54_05605 | 1140483 | 1142216 | -1 multidrug ABC transporter ATP-binding protein  |
| 1136514 | 1146423 | 9909 OXZ33906.1  | B9N54_05610 | 1142218 | 1143948 | -1 ABC transporter ATP-binding protein            |
| 1136514 | 1146423 | 9909 OXZ33907.1  | B9N54_05615 | 1144006 | 1144641 | -1 TetR family transcriptional regulator          |
| 1136514 | 1146423 | 9909 OXZ33673.1  | B9N54_05620 | 1146067 | 1146423 | 1 plasmid mobilization relaxosome protein MobC    |
| 1162730 | 1167884 | 5154 OXZ33589.1  | B9N54_05675 | 1155100 | 1162743 | -1 DNA helicase                                   |
| 1162730 | 1167884 | 5154 OXZ33590.1  | B9N54_05680 | 1162730 | 1163695 | -1 DNA (cytosine-5-)-methyltransferase            |
| 1162730 | 1167884 | 5154 OXZ33591.1  | B9N54_05685 | 1163688 | 1165409 | -1 DNA topoisomerase III                          |
| 1162730 | 1167884 | 5154 OXZ33592.1  | B9N54_05690 | 1165516 | 1166934 | -1 AAA family ATPase                              |

|         |         |                   |             |         |         |                                                                                            |
|---------|---------|-------------------|-------------|---------|---------|--------------------------------------------------------------------------------------------|
| 1162730 | 1167884 | 5154 OXZ33593.1   | B9N54_05695 | 1167015 | 1167884 | -1 bacteriocin                                                                             |
| 1185429 | 1198486 | 13057 OXZ33611.1  | B9N54_05795 | 1185429 | 1187150 | -1 ABC transporter ATP-binding protein                                                     |
| 1185429 | 1198486 | 13057 OXZ33612.1  | B9N54_05800 | 1187140 | 1188897 | -1 ABC transporter ATP-binding protein                                                     |
| 1185429 | 1198486 | 13057 OXZ33613.1  | B9N54_05805 | 1188915 | 1190297 | -1 ABC transporter ATP-binding protein                                                     |
| 1185429 | 1198486 | 13057 OXZ33614.1  | B9N54_05810 | 1190290 | 1191003 | -1 cobalt transporter                                                                      |
| 1185429 | 1198486 | 13057 OXZ33615.1  | B9N54_05815 | 1191003 | 1191599 | -1 hypothetical protein                                                                    |
| 1185429 | 1198486 | 13057 OXZ33616.1  | B9N54_05820 | 1191680 | 1192285 | -1 TetR family transcriptional regulator                                                   |
| 1185429 | 1198486 | 13057 OXZ33617.1  | B9N54_05825 | 1192402 | 1194231 | -1 recombinase TnpX                                                                        |
| 1185429 | 1198486 | 13057 OXZ33618.1  | B9N54_05830 | 1194271 | 1195323 | -1 conjugal transfer protein TraG                                                          |
| 1185429 | 1198486 | 13057 OXZ33619.1  | B9N54_05835 | 1195316 | 1196050 | -1 phage antirepressor Ant                                                                 |
| 1185429 | 1198486 | 13057 OXZ33620.1  | B9N54_05840 | 1196047 | 1196532 | -1 conjugal transfer protein                                                               |
| 1185429 | 1198486 | 13057 OXZ33621.1  | B9N54_05845 | 1196525 | 1197352 | -1 nucleoside triphosphate hydrolase                                                       |
| 1185429 | 1198486 | 13057 OXZ33622.1  | B9N54_05850 | 1197349 | 1198122 | -1 replication initiator protein A                                                         |
| 1185429 | 1198486 | 13057 OXZ33623.1  | B9N54_05855 | 1198205 | 1198486 | -1 hypothetical protein                                                                    |
| 1631909 | 1691704 | 59795 OXZ32456.1  | B9N54_07905 | 1631909 | 1632202 | -1 hypothetical protein                                                                    |
| 1631909 | 1691704 | 59795 OXZ32457.1  | B9N54_07910 | 1632337 | 1632645 | -1 exosortase                                                                              |
| 1631909 | 1691704 | 59795             | B9N54_07915 | 1632651 | 1633321 | -1 ATPase                                                                                  |
| 1631909 | 1691704 | 59795 OXZ32458.1  | B9N54_07920 | 1633701 | 1634243 | -1 hypothetical protein                                                                    |
| 1631909 | 1691704 | 59795 OXZ32459.1  | B9N54_07925 | 1634540 | 1636144 | -1 macrolide ABC transporter ATP-binding protein                                           |
| 1631909 | 1691704 | 59795             | B9N54_07930 | 1636624 | 1637011 | -1 hypothetical protein                                                                    |
| 1631909 | 1691704 | 59795 OXZ32460.1  | B9N54_07935 | 1637071 | 1637562 | -1 protein-S-isoprenylcysteine methyltransferase                                           |
| 1631909 | 1691704 | 59795 OXZ32461.1  | B9N54_07940 | 1637576 | 1638514 | -1 esterase                                                                                |
| 1631909 | 1691704 | 59795 OXZ32462.1  | B9N54_07945 | 1638583 | 1639209 | -1 hypothetical protein                                                                    |
| 1631909 | 1691704 | 59795 OXZ32463.1  | B9N54_07950 | 1639237 | 1639845 | -1 SAM-dependent methyltransferase                                                         |
| 1631909 | 1691704 | 59795 OXZ32464.1  | B9N54_07955 | 1640060 | 1640809 | -1 phosphorylase                                                                           |
| 1631909 | 1691704 | 59795 OXZ32465.1  | B9N54_07960 | 1640944 | 1641558 | -1 hypothetical protein                                                                    |
| 1631909 | 1691704 | 59795 OXZ32466.1  | B9N54_07965 | 1641767 | 1643131 | -1 ABC transporter ATP-binding protein                                                     |
| 1631909 | 1691704 | 59795 OXZ32467.1  | B9N54_07970 | 1643125 | 1643814 | -1 cobalt ABC transporter permease                                                         |
| 1631909 | 1691704 | 59795 OXZ32468.1  | B9N54_07975 | 1643814 | 1644398 | -1 hypothetical protein                                                                    |
| 1631909 | 1691704 | 59795 OXZ32469.1  | B9N54_07980 | 1644458 | 1645801 | -1 MATE family efflux transporter                                                          |
| 1631909 | 1691704 | 59795 OXZ32470.1  | B9N54_07985 | 1645813 | 1647534 | -1 ABC transporter ATP-binding protein                                                     |
| 1631909 | 1691704 | 59795 OXZ32471.1  | B9N54_07990 | 1647518 | 1649272 | -1 ABC transporter ATP-binding protein                                                     |
| 1631909 | 1691704 | 59795 OXZ32472.1  | B9N54_07995 | 1649433 | 1650425 | 1 AraC family transcriptional regulator                                                    |
| 1631909 | 1691704 | 59795             | B9N54_08000 | 1650854 | 1651616 | -1 hypothetical protein                                                                    |
| 1631909 | 1691704 | 59795 OXZ32473.1  | B9N54_08005 | 1651609 | 1653345 | -1 multidrug ABC transporter ATP-binding protein                                           |
| 1631909 | 1691704 | 59795 OXZ32474.1  | B9N54_08010 | 1653338 | 1655059 | -1 ABC transporter ATP-binding protein                                                     |
| 1631909 | 1691704 | 59795 OXZ32475.1  | B9N54_08015 | 1655059 | 1656522 | -1 ABC transporter                                                                         |
| 1631909 | 1691704 | 59795 OXZ32476.1  | B9N54_08020 | 1656524 | 1657195 | -1 cobalt transporter                                                                      |
| 1631909 | 1691704 | 59795 OXZ32477.1  | B9N54_08025 | 1657192 | 1657782 | -1 hypothetical protein                                                                    |
| 1631909 | 1691704 | 59795 OXZ32478.1  | B9N54_08030 | 1657849 | 1658826 | -1 AraC family transcriptional regulator                                                   |
| 1631909 | 1691704 | 59795 OXZ32479.1  | B9N54_08035 | 1658836 | 1659420 | -1 TetR family transcriptional regulator                                                   |
| 1631909 | 1691704 | 59795 OXZ32480.1  | B9N54_08040 | 1659858 | 1660199 | 1 plasmid mobilization relaxosome protein MobC                                             |
| 1631909 | 1691704 | 59795 OXZ32481.1  | B9N54_08045 | 1660574 | 1662907 | -1 peptidase S8                                                                            |
| 1631909 | 1691704 | 59795 OXZ32482.1  | B9N54_08050 | 1662910 | 1664007 | -1 ATPase                                                                                  |
| 1631909 | 1691704 | 59795 OXZ32483.1  | B9N54_08055 | 1664488 | 1664934 | -1 abortive infection protein                                                              |
| 1631909 | 1691704 | 59795 OXZ32484.1  | B9N54_08060 | 1665018 | 1665866 | -1 AraC family transcriptional regulator<br>23S rRNA (uracil(1939)-C(5))-methyltransferase |
| 1631909 | 1691704 | 59795             | B9N54_08065 | 1666434 | 1667498 | -1 RlmD                                                                                    |
| 1631909 | 1691704 | 59795 OXZ32485.1  | B9N54_08070 | 1667999 | 1669765 | -1 hypothetical protein                                                                    |
| 1631909 | 1691704 | 59795 OXZ32493.1  | B9N54_08075 | 1669780 | 1670097 | -1 nucleotide pyrophosphohydrolase                                                         |
| 1631909 | 1691704 | 59795 OXZ32486.1  | B9N54_08080 | 1670110 | 1671900 | -1 hypothetical protein                                                                    |
| 1631909 | 1691704 | 59795             | B9N54_08085 | 1672610 | 1673406 | -1 lysophospholipase                                                                       |
| 1631909 | 1691704 | 59795 OXZ32487.1  | B9N54_08090 | 1673763 | 1674020 | -1 hypothetical protein                                                                    |
| 1631909 | 1691704 | 59795 OXZ32488.1  | B9N54_08095 | 1674041 | 1676476 | -1 ABC transporter permease                                                                |
| 1631909 | 1691704 | 59795 OXZ32489.1  | B9N54_08100 | 1676469 | 1677149 | -1 peptide ABC transporter ATP-binding protein                                             |
| 1631909 | 1691704 | 59795 OXZ32490.1  | B9N54_08105 | 1677202 | 1678062 | -1 two-component sensor histidine kinase                                                   |
| 1631909 | 1691704 | 59795 OXZ32491.1  | B9N54_08110 | 1678063 | 1678713 | -1 DNA-binding response regulator                                                          |
| 1631909 | 1691704 | 59795 OXZ32492.1  | B9N54_08115 | 1678899 | 1679023 | 1 transposase                                                                              |
| 1631909 | 1691704 | 59795 OXZ32171.1  | B9N54_08120 | 1680024 | 1680187 | 1 hypothetical protein                                                                     |
| 1631909 | 1691704 | 59795 OXZ32172.1  | B9N54_08125 | 1680267 | 1682039 | -1 recombinase family protein                                                              |
| 1631909 | 1691704 | 59795 OXZ32173.1  | B9N54_08130 | 1682620 | 1684011 | -1 ABC transporter                                                                         |
| 1631909 | 1691704 | 59795 OXZ32174.1  | B9N54_08135 | 1684008 | 1684736 | -1 transporter                                                                             |
| 1631909 | 1691704 | 59795 OXZ32175.1  | B9N54_08140 | 1684736 | 1685326 | -1 hypothetical protein                                                                    |
| 1631909 | 1691704 | 59795 OXZ32176.1  | B9N54_08145 | 1685352 | 1687076 | -1 ABC transporter permease                                                                |
| 1631909 | 1691704 | 59795 OXZ32177.1  | B9N54_08150 | 1687073 | 1688842 | -1 ABC transporter permease                                                                |
| 1631909 | 1691704 | 59795 OXZ32178.1  | B9N54_08155 | 1688950 | 1689564 | -1 TetR family transcriptional regulator                                                   |
| 1631909 | 1691704 | 59795 OXZ32179.1  | B9N54_08160 | 1689968 | 1691704 | -1 multidrug ABC transporter ATP-binding protein                                           |
| 1631909 | 1691704 | 59795 OXZ32180.1  | B9N54_08165 | 1691697 | 1693415 | -1 ABC transporter ATP-binding protein                                                     |
| 1653338 | 1665866 | 12528 OXZ32473.1  | B9N54_08005 | 1651609 | 1653345 | -1 multidrug ABC transporter ATP-binding protein                                           |
| 1653338 | 1665866 | 12528 OXZ32474.1  | B9N54_08010 | 1653338 | 1655059 | -1 ABC transporter ATP-binding protein                                                     |
| 1653338 | 1665866 | 12528 OXZ32475.1  | B9N54_08015 | 1655059 | 1656522 | -1 ABC transporter                                                                         |
| 1653338 | 1665866 | 12528 OXZ32476.1  | B9N54_08020 | 1656524 | 1657195 | -1 cobalt transporter                                                                      |
| 1653338 | 1665866 | 12528 OXZ32477.1  | B9N54_08025 | 1657192 | 1657782 | -1 hypothetical protein                                                                    |
| 1653338 | 1665866 | 12528 OXZ32478.1  | B9N54_08030 | 1657849 | 1658826 | -1 AraC family transcriptional regulator                                                   |
| 1653338 | 1665866 | 12528 OXZ32479.1  | B9N54_08035 | 1658836 | 1659420 | -1 TetR family transcriptional regulator                                                   |
| 1653338 | 1665866 | 12528 OXZ32480.1  | B9N54_08040 | 1659858 | 1660199 | 1 plasmid mobilization relaxosome protein MobC                                             |
| 1653338 | 1665866 | 12528 OXZ32481.1  | B9N54_08045 | 1660574 | 1662907 | -1 peptidase S8                                                                            |
| 1653338 | 1665866 | 12528 OXZ32482.1  | B9N54_08050 | 1662910 | 1664007 | -1 ATPase                                                                                  |
| 1653338 | 1665866 | 12528 OXZ32483.1  | B9N54_08055 | 1664488 | 1664934 | -1 abortive infection protein                                                              |
| 1653338 | 1665866 | 12528 OXZ32484.1  | B9N54_08060 | 1665018 | 1665866 | -1 AraC family transcriptional regulator                                                   |
| 1722538 | 1824911 | 102373 OXZ32116.1 | B9N54_08255 | 1720719 | 1722554 | -1 multidrug ABC transporter                                                               |
| 1722538 | 1824911 | 102373 OXZ32117.1 | B9N54_08260 | 1722538 | 1724340 | -1 multidrug ABC transporter                                                               |
| 1722538 | 1824911 | 102373 OXZ32118.1 | B9N54_08265 | 1724420 | 1725085 | -1 histidine kinase                                                                        |

|         |         |        |            |             |         |         |                                                                        |
|---------|---------|--------|------------|-------------|---------|---------|------------------------------------------------------------------------|
| 1722538 | 1824911 | 102373 | OXZ32119.1 | B9N54_08270 | 1725093 | 1725788 | -1 DNA-binding response regulator                                      |
| 1722538 | 1824911 | 102373 | OXZ32120.1 | B9N54_08275 | 1725872 | 1726735 | -1 UTP--glucose-1-phosphate uridylyltransferase                        |
| 1722538 | 1824911 | 102373 | OXZ32121.1 | B9N54_08280 | 1727463 | 1730048 | -1 ATP-dependent chaperone ClpB                                        |
| 1722538 | 1824911 | 102373 | OXZ32122.1 | B9N54_08285 | 1730067 | 1731011 | -1 heat-shock protein                                                  |
| 1722538 | 1824911 | 102373 | OXZ32123.1 | B9N54_08290 | 1731172 | 1731837 | -1 nitroreductase                                                      |
| 1722538 | 1824911 | 102373 | OXZ32124.1 | B9N54_08295 | 1731989 | 1732528 | -1 RNA polymerase subunit sigma                                        |
| 1722538 | 1824911 | 102373 | OXZ32125.1 | B9N54_08300 | 1732767 | 1733222 | 1 hypothetical protein                                                 |
| 1722538 | 1824911 | 102373 | OXZ32126.1 | B9N54_08305 | 1733323 | 1737573 | -1 hypothetical protein                                                |
| 1722538 | 1824911 | 102373 |            | B9N54_08310 | 1738533 | 1738844 | -1 hypothetical protein                                                |
| 1722538 | 1824911 | 102373 | OXZ32127.1 | B9N54_08315 | 1738878 | 1739078 | -1 hypothetical protein                                                |
| 1722538 | 1824911 | 102373 | OXZ32128.1 | B9N54_08320 | 1739665 | 1740216 | 1 hypothetical protein                                                 |
| 1722538 | 1824911 | 102373 | OXZ32129.1 | B9N54_08325 | 1740277 | 1740489 | 1 hypothetical protein                                                 |
| 1722538 | 1824911 | 102373 | OXZ32130.1 | B9N54_08330 | 1740569 | 1741717 | 1 MFS transporter                                                      |
| 1722538 | 1824911 | 102373 | OXZ32131.1 | B9N54_08335 | 1741802 | 1742299 | -1 hypothetical protein                                                |
| 1722538 | 1824911 | 102373 | OXZ32132.1 | B9N54_08340 | 1742333 | 1742806 | -1 peptidase M50                                                       |
| 1722538 | 1824911 | 102373 | OXZ32133.1 | B9N54_08345 | 1743311 | 1744294 | -1 albumin-binding protein                                             |
| 1722538 | 1824911 | 102373 | OXZ32134.1 | B9N54_08350 | 1744957 | 1745379 | -1 hypothetical protein                                                |
| 1722538 | 1824911 | 102373 | OXZ32135.1 | B9N54_08355 | 1745424 | 1746359 | -1 TIGR01212 family radical SAM protein                                |
| 1722538 | 1824911 | 102373 | OXZ32136.1 | B9N54_08360 | 1746352 | 1746792 | -1 peroxiredoxin                                                       |
| 1722538 | 1824911 | 102373 | OXZ32137.1 | B9N54_08365 | 1746785 | 1747621 | -1 hydrolase                                                           |
| 1722538 | 1824911 | 102373 | OXZ32138.1 | B9N54_08370 | 1747611 | 1747934 | -1 DUF1292 domain-containing protein                                   |
| 1722538 | 1824911 | 102373 | OXZ32139.1 | B9N54_08375 | 1747949 | 1749340 | -1 aminoacyl-histidine dipeptidase                                     |
| 1722538 | 1824911 | 102373 | OXZ32140.1 | B9N54_08380 | 1749405 | 1750523 | -1 hypothetical protein                                                |
| 1722538 | 1824911 | 102373 | OXZ32141.1 | B9N54_08385 | 1750577 | 1751566 | -1 peptide chain release factor 2                                      |
| 1722538 | 1824911 | 102373 | OXZ32142.1 | B9N54_08390 | 1751598 | 1751777 | -1 hypothetical protein                                                |
| 1722538 | 1824911 | 102373 | OXZ32143.1 | B9N54_08395 | 1752103 | 1754832 | -1 preprotein translocase subunit SecA                                 |
| 1722538 | 1824911 | 102373 | OXZ32144.1 | B9N54_08400 | 1755433 | 1756143 | -1 transaldolase                                                       |
| 1722538 | 1824911 | 102373 | OXZ32145.1 | B9N54_08405 | 1756171 | 1757529 | -1 PTS ascorbate transporter subunit IIC                               |
| 1722538 | 1824911 | 102373 | OXZ32146.1 | B9N54_08410 | 1757547 | 1757822 | -1 PTS maltose transporter subunit IIBC                                |
| 1722538 | 1824911 | 102373 | OXZ32147.1 | B9N54_08415 | 1757815 | 1758285 | -1 PTS sugar transporter subunit IIA                                   |
| 1722538 | 1824911 | 102373 | OXZ32148.1 | B9N54_08420 | 1758393 | 1759310 | -1 malate transporter                                                  |
| 1722538 | 1824911 | 102373 | OXZ32149.1 | B9N54_08425 | 1759819 | 1761279 | -1 peptide-binding protein                                             |
| 1722538 | 1824911 | 102373 | OXZ32150.1 | B9N54_08430 | 1761468 | 1762613 | -1 hypothetical protein<br>UDP-N-acetylmuramoyl-L-alanyl-D-glutamate-- |
| 1722538 | 1824911 | 102373 | OXZ32151.1 | B9N54_08435 | 1763296 | 1764732 | -1 2, 6-diaminopimelate ligase                                         |
| 1722538 | 1824911 | 102373 | OXZ32152.1 | B9N54_08440 | 1764988 | 1765842 | -1 beta-carotene 15,15'-monooxygenase                                  |
| 1722538 | 1824911 | 102373 | OXZ32153.1 | B9N54_08445 | 1765862 | 1766728 | -1 polyphosphate--nucleotide phosphotransferase                        |
| 1722538 | 1824911 | 102373 | OXZ32154.1 | B9N54_08450 | 1766927 | 1767913 | 1 alkane 1-monooxygenase                                               |
| 1722538 | 1824911 | 102373 | OXZ32155.1 | B9N54_08455 | 1768168 | 1769046 | -1 ribokinase                                                          |
| 1722538 | 1824911 | 102373 | OXZ32156.1 | B9N54_08460 | 1769195 | 1773166 | -1 hypothetical protein                                                |
| 1722538 | 1824911 | 102373 | OXZ32157.1 | B9N54_08465 | 1773446 | 1779070 | -1 hypothetical protein                                                |
| 1722538 | 1824911 | 102373 | OXZ32158.1 | B9N54_08470 | 1779344 | 1780198 | 1 hypothetical protein                                                 |
| 1722538 | 1824911 | 102373 | OXZ32159.1 | B9N54_08475 | 1780318 | 1788978 | -1 hypothetical protein                                                |
| 1722538 | 1824911 | 102373 | OXZ32106.1 | B9N54_08480 | 1790559 | 1791107 | 1 hypothetical protein                                                 |
| 1722538 | 1824911 | 102373 | OXZ32107.1 | B9N54_08485 | 1791143 | 1792447 | 1 N-acetylmuramoyl-L-alanine amidase                                   |
| 1722538 | 1824911 | 102373 | OXZ32108.1 | B9N54_08490 | 1792594 | 1792701 | 1 transposase                                                          |
| 1722538 | 1824911 | 102373 | OXZ31954.1 | B9N54_08495 | 1793975 | 1794298 | -1 hypothetical protein                                                |
| 1722538 | 1824911 | 102373 | OXZ31955.1 | B9N54_08500 | 1794364 | 1794858 | -1 hypothetical protein                                                |
| 1722538 | 1824911 | 102373 | OXZ31956.1 | B9N54_08505 | 1794926 | 1795753 | -1 hypothetical protein                                                |
| 1722538 | 1824911 | 102373 | OXZ31957.1 | B9N54_08510 | 1795918 | 1796565 | 1 sugar ABC transporter ATP-binding protein                            |
| 1722538 | 1824911 | 102373 | OXZ31958.1 | B9N54_08515 | 1796549 | 1797193 | 1 sugar ABC transporter permease                                       |
| 1722538 | 1824911 | 102373 | OXZ31959.1 | B9N54_08520 | 1797194 | 1797712 | 1 hypothetical protein                                                 |
| 1722538 | 1824911 | 102373 | OXZ31857.1 | B9N54_08525 | 1799044 | 1799571 | 1 hypothetical protein<br>calcium-translocating P-type ATPase, SERCA-  |
| 1722538 | 1824911 | 102373 | OXZ31919.1 | B9N54_08530 | 1800427 | 1803114 | -1 type                                                                |
| 1722538 | 1824911 | 102373 | OXZ31858.1 | B9N54_08535 | 1803284 | 1804042 | -1 metal-dependent hydrolase                                           |
| 1722538 | 1824911 | 102373 | OXZ31859.1 | B9N54_08540 | 1804168 | 1804638 | 1 aminoacyl-tRNA deacylase                                             |
| 1722538 | 1824911 | 102373 | OXZ31860.1 | B9N54_08545 | 1804641 | 1805945 | 1 glutamate--cysteine ligase                                           |
| 1722538 | 1824911 | 102373 | OXZ31861.1 | B9N54_08550 | 1805938 | 1807248 | 1 glutathionylspermidine synthase                                      |
| 1722538 | 1824911 | 102373 | OXZ31862.1 | B9N54_08555 | 1807345 | 1807614 | -1 Txe/YoeB family addiction module toxin                              |
| 1722538 | 1824911 | 102373 | OXZ31863.1 | B9N54_08560 | 1807608 | 1807856 | -1 prevent-host-death protein                                          |
| 1722538 | 1824911 | 102373 | OXZ31864.1 | B9N54_08565 | 1808039 | 1808458 | 1 CMP deaminase                                                        |
| 1722538 | 1824911 | 102373 | OXZ31865.1 | B9N54_08570 | 1808470 | 1811889 | 1 pyruvate carboxylase                                                 |
| 1722538 | 1824911 | 102373 | OXZ31866.1 | B9N54_08575 | 1811926 | 1812330 | -1 DUF3139 domain-containing protein                                   |
| 1722538 | 1824911 | 102373 | OXZ31867.1 | B9N54_08580 | 1812461 | 1812703 | 1 cell division protein FtsW                                           |
| 1722538 | 1824911 | 102373 | OXZ31868.1 | B9N54_08585 | 1812806 | 1813213 | 1 hypothetical protein                                                 |
| 1722538 | 1824911 | 102373 | OXZ31869.1 | B9N54_08590 | 1813229 | 1813735 | -1 thiol reductase thioredoxin                                         |
| 1722538 | 1824911 | 102373 | OXZ31870.1 | B9N54_08595 | 1813840 | 1814184 | -1 hypothetical protein                                                |
| 1722538 | 1824911 | 102373 | OXZ31871.1 | B9N54_08600 | 1814249 | 1814938 | -1 hypothetical protein                                                |
| 1722538 | 1824911 | 102373 | OXZ31872.1 | B9N54_08605 | 1814935 | 1819629 | -1 FMN-binding domain-containing protein                               |
| 1722538 | 1824911 | 102373 | OXZ31920.1 | B9N54_08610 | 1819874 | 1820827 | -1 2-dehydropantoate 2-reductase                                       |
| 1722538 | 1824911 | 102373 | OXZ31873.1 | B9N54_08615 | 1820847 | 1822496 | -1 inorganic pyrophosphatase                                           |
| 1722538 | 1824911 | 102373 | OXZ31874.1 | B9N54_08620 | 1822661 | 1823182 | 1 N-carbamoylsarcosine amidohydrolase                                  |
| 1722538 | 1824911 | 102373 |            | B9N54_08625 | 1823405 | 1823742 | -1 RNA helicase                                                        |
| 1722538 | 1824911 | 102373 | OXZ31875.1 | B9N54_08630 | 1824068 | 1824496 | -1 hypothetical protein                                                |
| 1722538 | 1824911 | 102373 | OXZ31876.1 | B9N54_08635 | 1824555 | 1824911 | -1 hypothetical protein                                                |
| 1867992 | 1874956 | 6964   | OXZ31643.1 | B9N54_08875 | 1867992 | 1868531 | 1 transposase                                                          |
| 1867992 | 1874956 | 6964   | OXZ31644.1 | B9N54_08880 | 1868726 | 1869351 | 1 IS3 family transposase                                               |
| 1867992 | 1874956 | 6964   | OXZ31452.1 | B9N54_08900 | 1872118 | 1872655 | -1 IS110 family transposase                                            |
| 1867992 | 1874956 | 6964   | OXZ31645.1 | B9N54_08870 | 1873742 | 1874956 | 1 IS256 family transposase                                             |



**Table S3H: Predicted genomic islands in the genome of "F. nericia" CCUG54800**

Shown are genes of genomic islands predicted by IslandViewer4

| Island start | Island end | Length | Gene name  | Locus       | Gene start | Gene end | Strand | Product                                        |
|--------------|------------|--------|------------|-------------|------------|----------|--------|------------------------------------------------|
| 68253        | 77535      | 9282   | OXZ29102.1 | B9N49_00325 | 68253      | 69122    | 1      | hypothetical protein                           |
| 68253        | 77535      | 9282   | OXZ29103.1 | B9N49_00330 | 69109      | 71097    | 1      | exopolyphosphatase                             |
| 68253        | 77535      | 9282   | OXZ29104.1 | B9N49_00335 | 71078      | 71524    | 1      | 50S ribosomal protein L9                       |
| 68253        | 77535      | 9282   | OXZ29105.1 | B9N49_00340 | 71558      | 72895    | 1      | replicative DNA helicase                       |
| 68253        | 77535      | 9282   | OXZ29106.1 | B9N49_00345 | 72892      | 73455    | 1      | GNAT family N-acetyltransferase                |
| 68253        | 77535      | 9282   | OXZ29107.1 | B9N49_00350 | 73460      | 74218    | 1      | DNA replication protein                        |
| 68253        | 77535      | 9282   | OXZ29108.1 | B9N49_00355 | 74221      | 75198    | 1      | DNA replication protein DnaC                   |
| 68253        | 77535      | 9282   | OXZ29109.1 | B9N49_00360 | 75195      | 75839    | 1      | NAD(P)H-hydrate epimerase                      |
| 68253        | 77535      | 9282   | OXZ29110.1 | B9N49_00365 | 76323      | 76865    | 1      | ECF transporter S component                    |
| 68253        | 77535      | 9282   | OXZ29111.1 | B9N49_00370 | 76849      | 77535    | 1      | radical SAM protein                            |
| 1015853      | 1107796    | 91943  | OXZ27717.1 | B9N49_05145 | 1015853    | 1016062  | -1     | excisionase                                    |
| 1015853      | 1107796    | 91943  | OXZ27718.1 | B9N49_05150 | 1016498    | 1016908  | -1     | RNA polymerase subunit sigma                   |
| 1015853      | 1107796    | 91943  | OXZ27361.1 | B9N49_05155 | 1018276    | 1018815  | 1      | transposase                                    |
| 1015853      | 1107796    | 91943  | OXZ27362.1 | B9N49_05160 | 1018803    | 1019684  | 1      | hypothetical protein                           |
| 1015853      | 1107796    | 91943  | OXZ27348.1 | B9N49_05165 | 1020784    | 1021207  | -1     | MATE family efflux transporter                 |
| 1015853      | 1107796    | 91943  | OXZ27349.1 | B9N49_05170 | 1021249    | 1022712  | -1     | ABC transporter                                |
| 1015853      | 1107796    | 91943  | OXZ27350.1 | B9N49_05175 | 1022715    | 1023449  | -1     | transporter                                    |
| 1015853      | 1107796    | 91943  | OXZ27351.1 | B9N49_05180 | 1023449    | 1024030  | -1     | hypothetical protein                           |
| 1015853      | 1107796    | 91943  | OXZ27352.1 | B9N49_05185 | 1024111    | 1025844  | -1     | multidrug ABC transporter ATP-binding protein  |
| 1015853      | 1107796    | 91943  | OXZ27353.1 | B9N49_05190 | 1025838    | 1027583  | -1     | ABC transporter ATP-binding protein            |
| 1015853      | 1107796    | 91943  | OXZ27354.1 | B9N49_05195 | 1027677    | 1028300  | -1     | TetR family transcriptional regulator          |
| 1015853      | 1107796    | 91943  | OXZ27355.1 | B9N49_05200 | 1028609    | 1028965  | 1      | plasmid mobilization relaxosome protein MobC   |
| 1015853      | 1107796    | 91943  | OXZ27356.1 | B9N49_05205 | 1028967    | 1030298  | 1      | endonuclease                                   |
| 1015853      | 1107796    | 91943  | OXZ27357.1 | B9N49_05210 | 1030454    | 1031110  | -1     | DNA-binding protein                            |
| 1015853      | 1107796    | 91943  |            | B9N49_05215 | 1031154    | 1038797  | -1     | DNA helicase                                   |
| 1015853      | 1107796    | 91943  | OXZ27360.1 | B9N49_05220 | 1038882    | 1040384  | -1     | SIR2 family protein                            |
| 1015853      | 1107796    | 91943  | OXZ27358.1 | B9N49_05225 | 1040441    | 1041379  | -1     | DNA (cytosine-5-)-methyltransferase            |
| 1015853      | 1107796    | 91943  | OXZ27359.1 | B9N49_05230 | 1041372    | 1043093  | -1     | DNA topoisomerase III                          |
| 1015853      | 1107796    | 91943  | OXZ27256.1 | B9N49_05235 | 1044146    | 1044516  | -1     | thioesterase                                   |
| 1015853      | 1107796    | 91943  | OXZ27257.1 | B9N49_05240 | 1044673    | 1045044  | -1     | transcriptional regulator                      |
| 1015853      | 1107796    | 91943  |            | B9N49_05245 | 1045511    | 1045651  | -1     | diacylglycerol transferase                     |
| 1015853      | 1107796    | 91943  | OXZ27258.1 | B9N49_05250 | 1045700    | 1046068  | 1      | plasmid mobilization relaxosome protein MobC   |
| 1015853      | 1107796    | 91943  | OXZ27259.1 | B9N49_05255 | 1046068    | 1047438  | 1      | endonuclease                                   |
| 1015853      | 1107796    | 91943  | OXZ27260.1 | B9N49_05260 | 1047599    | 1048474  | -1     | single-stranded DNA-binding protein            |
| 1015853      | 1107796    | 91943  | OXZ27261.1 | B9N49_05265 | 1048775    | 1059184  | -1     | conjugal transfer protein                      |
| 1015853      | 1107796    | 91943  | OXZ27262.1 | B9N49_05270 | 1059379    | 1059819  | -1     | terminase large subunit                        |
| 1015853      | 1107796    | 91943  | OXZ27263.1 | B9N49_05275 | 1060047    | 1061753  | -1     | DNA topoisomerase III                          |
| 1015853      | 1107796    | 91943  | OXZ27264.1 | B9N49_05280 | 1062170    | 1063048  | -1     | bacteriocin                                    |
| 1015853      | 1107796    | 91943  | OXZ27265.1 | B9N49_05285 | 1063064    | 1065418  | -1     | copper amine oxidase                           |
| 1015853      | 1107796    | 91943  | OXZ27266.1 | B9N49_05290 | 1065415    | 1065672  | -1     | hypothetical protein                           |
| 1015853      | 1107796    | 91943  | OXZ27267.1 | B9N49_05295 | 1065692    | 1068655  | -1     | hypothetical protein                           |
| 1015853      | 1107796    | 91943  | OXZ27268.1 | B9N49_05300 | 1068665    | 1069630  | -1     | site-specific DNA-methyltransferase            |
| 1015853      | 1107796    | 91943  | OXZ27269.1 | B9N49_05305 | 1069602    | 1072097  | -1     | conjugal transfer protein TraE                 |
| 1015853      | 1107796    | 91943  |            | B9N49_05310 | 1072094    | 1072288  | -1     | conjugal transfer protein                      |
| 1015853      | 1107796    | 91943  | OXZ27270.1 | B9N49_05315 | 1072332    | 1072470  | 1      | transposase                                    |
| 1015853      | 1107796    | 91943  | OXZ27234.1 | B9N49_05320 | 1073471    | 1073609  | -1     | transposase                                    |
| 1015853      | 1107796    | 91943  | OXZ27235.1 | B9N49_05325 | 1073690    | 1075696  | -1     | hypothetical protein                           |
| 1015853      | 1107796    | 91943  | OXZ27236.1 | B9N49_05330 | 1075697    | 1076452  | -1     | bacitracin ABC transporter ATP-binding protein |
| 1015853      | 1107796    | 91943  | OXZ27237.1 | B9N49_05335 | 1076436    | 1078589  | -1     | lantibiotic transporter                        |
| 1015853      | 1107796    | 91943  | OXZ27238.1 | B9N49_05340 | 1078573    | 1080699  | -1     | hypothetical protein                           |
| 1015853      | 1107796    | 91943  | OXZ27239.1 | B9N49_05345 | 1080671    | 1081477  | -1     | hypothetical protein                           |
| 1015853      | 1107796    | 91943  | OXZ27240.1 | B9N49_05350 | 1081750    | 1082406  | -1     | DNA-binding protein                            |
| 1015853      | 1107796    | 91943  | OXZ27241.1 | B9N49_05355 | 1082450    | 1090093  | -1     | DNA helicase                                   |
| 1015853      | 1107796    | 91943  | OXZ27242.1 | B9N49_05360 | 1090176    | 1092389  | -1     | hypothetical protein                           |
| 1015853      | 1107796    | 91943  | OXZ27243.1 | B9N49_05365 | 1092425    | 1093387  | -1     | DNA (cytosine-5-)-methyltransferase            |
| 1015853      | 1107796    | 91943  | OXZ27244.1 | B9N49_05370 | 1093380    | 1095101  | -1     | DNA topoisomerase III                          |
| 1015853      | 1107796    | 91943  | OXZ27245.1 | B9N49_05375 | 1095190    | 1096173  | -1     | hypothetical protein                           |
| 1015853      | 1107796    | 91943  | OXZ27246.1 | B9N49_05380 | 1096166    | 1096777  | -1     | hypothetical protein                           |
| 1015853      | 1107796    | 91943  | OXZ27247.1 | B9N49_05385 | 1096851    | 1097711  | -1     | bacteriocin                                    |
| 1015853      | 1107796    | 91943  | OXZ27248.1 | B9N49_05390 | 1097726    | 1099309  | -1     | copper amine oxidase                           |
| 1015853      | 1107796    | 91943  | OXZ27249.1 | B9N49_05395 | 1099296    | 1099535  | -1     | hypothetical protein                           |
| 1015853      | 1107796    | 91943  | OXZ27250.1 | B9N49_05400 | 1099550    | 1102129  | -1     | hypothetical protein                           |
| 1015853      | 1107796    | 91943  | OXZ27251.1 | B9N49_05405 | 1102137    | 1104560  | -1     | conjugal transfer protein TraE                 |
| 1015853      | 1107796    | 91943  | OXZ27252.1 | B9N49_05410 | 1104451    | 1104861  | -1     | conjugal transfer protein                      |
| 1015853      | 1107796    | 91943  | OXZ27253.1 | B9N49_05415 | 1104863    | 1105153  | -1     | hypothetical protein                           |
| 1015853      | 1107796    | 91943  | OXZ27254.1 | B9N49_05420 | 1105163    | 1106026  | -1     | hypothetical protein                           |
| 1015853      | 1107796    | 91943  | OXZ27255.1 | B9N49_05425 | 1106037    | 1106183  | -1     | hypothetical protein                           |
| 1015853      | 1107796    | 91943  | OXZ27208.1 | B9N49_05430 | 1107352    | 1107483  | -1     | hypothetical protein                           |
| 1015853      | 1107796    | 91943  | OXZ27209.1 | B9N49_05435 | 1107485    | 1107796  | -1     | single-stranded DNA-binding protein            |
| 1038882      | 1068655    | 29773  | OXZ27360.1 | B9N49_05220 | 1038882    | 1040384  | -1     | SIR2 family protein                            |
| 1038882      | 1068655    | 29773  | OXZ27358.1 | B9N49_05225 | 1040441    | 1041379  | -1     | DNA (cytosine-5-)-methyltransferase            |
| 1038882      | 1068655    | 29773  | OXZ27359.1 | B9N49_05230 | 1041372    | 1043093  | -1     | DNA topoisomerase III                          |
| 1038882      | 1068655    | 29773  | OXZ27256.1 | B9N49_05235 | 1044146    | 1044516  | -1     | thioesterase                                   |
| 1038882      | 1068655    | 29773  | OXZ27257.1 | B9N49_05240 | 1044673    | 1045044  | -1     | transcriptional regulator                      |
| 1038882      | 1068655    | 29773  |            | B9N49_05245 | 1045511    | 1045651  | -1     | diacylglycerol transferase                     |
| 1038882      | 1068655    | 29773  | OXZ27258.1 | B9N49_05250 | 1045700    | 1046068  | 1      | plasmid mobilization relaxosome protein MobC   |
| 1038882      | 1068655    | 29773  | OXZ27259.1 | B9N49_05255 | 1046068    | 1047438  | 1      | endonuclease                                   |
| 1038882      | 1068655    | 29773  | OXZ27260.1 | B9N49_05260 | 1047599    | 1048474  | -1     | single-stranded DNA-binding protein            |
| 1038882      | 1068655    | 29773  | OXZ27261.1 | B9N49_05265 | 1048775    | 1059184  | -1     | conjugal transfer protein                      |
| 1038882      | 1068655    | 29773  | OXZ27262.1 | B9N49_05270 | 1059379    | 1059819  | -1     | terminase large subunit                        |
| 1038882      | 1068655    | 29773  | OXZ27263.1 | B9N49_05275 | 1060047    | 1061753  | -1     | DNA topoisomerase III                          |
| 1038882      | 1068655    | 29773  | OXZ27264.1 | B9N49_05280 | 1062170    | 1063048  | -1     | bacteriocin                                    |

|         |         |                  |             |         |         |                                                   |
|---------|---------|------------------|-------------|---------|---------|---------------------------------------------------|
| 1038882 | 1068655 | 29773 OXZ27265.1 | B9N49_05285 | 1063064 | 1065418 | -1 copper amine oxidase                           |
| 1038882 | 1068655 | 29773 OXZ27266.1 | B9N49_05290 | 1065415 | 1065672 | -1 hypothetical protein                           |
| 1038882 | 1068655 | 29773 OXZ27267.1 | B9N49_05295 | 1065692 | 1068655 | -1 hypothetical protein                           |
| 1073690 | 1082406 | 8716 OXZ27235.1  | B9N49_05325 | 1073690 | 1075696 | -1 hypothetical protein                           |
| 1073690 | 1082406 | 8716 OXZ27236.1  | B9N49_05330 | 1075697 | 1076452 | -1 bacitracin ABC transporter ATP-binding protein |
| 1073690 | 1082406 | 8716 OXZ27237.1  | B9N49_05335 | 1076436 | 1078589 | -1 lantibiotic transporter                        |
| 1073690 | 1082406 | 8716 OXZ27238.1  | B9N49_05340 | 1078573 | 1080699 | -1 hypothetical protein                           |
| 1073690 | 1082406 | 8716 OXZ27239.1  | B9N49_05345 | 1080671 | 1081477 | -1 hypothetical protein                           |
| 1073690 | 1082406 | 8716 OXZ27240.1  | B9N49_05350 | 1081750 | 1082406 | -1 DNA-binding protein                            |
| 1090176 | 1097711 | 7535 OXZ27242.1  | B9N49_05360 | 1090176 | 1092389 | -1 hypothetical protein                           |
| 1090176 | 1097711 | 7535 OXZ27243.1  | B9N49_05365 | 1092425 | 1093387 | -1 DNA (cytosine-5-)-methyltransferase            |
| 1090176 | 1097711 | 7535 OXZ27244.1  | B9N49_05370 | 1093380 | 1095101 | -1 DNA topoisomerase III                          |
| 1090176 | 1097711 | 7535 OXZ27245.1  | B9N49_05375 | 1095190 | 1096173 | -1 hypothetical protein                           |
| 1090176 | 1097711 | 7535 OXZ27246.1  | B9N49_05380 | 1096166 | 1096777 | -1 hypothetical protein                           |
| 1090176 | 1097711 | 7535 OXZ27247.1  | B9N49_05385 | 1096851 | 1097711 | -1 bacteriocin                                    |
| 1107485 | 1112210 | 4725 OXZ27209.1  | B9N49_05435 | 1107485 | 1107796 | -1 single-stranded DNA-binding protein            |
| 1107485 | 1112210 | 4725             | B9N49_05440 | 1107992 | 1109461 | -1 hypothetical protein                           |
| 1107485 | 1112210 | 4725 OXZ27210.1  | B9N49_05445 | 1109479 | 1110015 | -1 ClbS/DfsB family four-helix bundle protein     |
| 1107485 | 1112210 | 4725 OXZ27211.1  | B9N49_05450 | 1110077 | 1110856 | -1 conjugal transfer protein TraG                 |
| 1107485 | 1112210 | 4725 OXZ27175.1  | B9N49_05455 | 1112025 | 1112210 | -1 hypothetical protein                           |
| 1116939 | 1128106 | 11167 OXZ27181.1 | B9N49_05485 | 1116939 | 1117214 | -1 hypothetical protein                           |
| 1116939 | 1128106 | 11167 OXZ27182.1 | B9N49_05490 | 1117268 | 1118815 | -1 hypothetical protein                           |
| 1116939 | 1128106 | 11167 OXZ27183.1 | B9N49_05495 | 1118812 | 1119522 | -1 ABC transporter                                |
| 1116939 | 1128106 | 11167 OXZ27184.1 | B9N49_05500 | 1119589 | 1119897 | -1 lysis protein                                  |
| 1116939 | 1128106 | 11167 OXZ27185.1 | B9N49_05505 | 1119878 | 1120477 | -1 hypothetical protein                           |
| 1116939 | 1128106 | 11167 OXZ27186.1 | B9N49_05510 | 1120467 | 1120742 | -1 transcriptional regulator                      |
| 1116939 | 1128106 | 11167 OXZ27187.1 | B9N49_05515 | 1120873 | 1122723 | -1 recombinase TnpX                               |
| 1116939 | 1128106 | 11167 OXZ27034.1 | B9N49_05520 | 1123890 | 1124942 | -1 conjugal transfer protein TraG                 |
| 1116939 | 1128106 | 11167 OXZ27035.1 | B9N49_05525 | 1124935 | 1125669 | -1 phage antirepressor Ant                        |
| 1116939 | 1128106 | 11167 OXZ27036.1 | B9N49_05530 | 1125666 | 1126151 | -1 conjugal transfer protein                      |
| 1116939 | 1128106 | 11167 OXZ27037.1 | B9N49_05535 | 1126144 | 1126971 | -1 nucleoside triphosphate hydrolase              |
| 1116939 | 1128106 | 11167 OXZ27038.1 | B9N49_05540 | 1126968 | 1127741 | -1 replication initiator protein A                |
| 1116939 | 1128106 | 11167 OXZ27039.1 | B9N49_05545 | 1127825 | 1128106 | -1 hypothetical protein                           |
| 1464214 | 1499122 | 34908 OXZ26914.1 | B9N49_07075 | 1464214 | 1465734 | -1 conjugal transfer protein                      |
| 1464214 | 1499122 | 34908 OXZ26915.1 | B9N49_07080 | 1465727 | 1467469 | -1 recombinase                                    |
| 1464214 | 1499122 | 34908 OXZ26916.1 | B9N49_07085 | 1467462 | 1469180 | -1 recombinase                                    |
| 1464214 | 1499122 | 34908 OXZ26917.1 | B9N49_07090 | 1469279 | 1469446 | -1 aminoacyl-tRNA hydrolase                       |
| 1464214 | 1499122 | 34908 OXZ26918.1 | B9N49_07095 | 1469899 | 1470372 | -1 RNA polymerase subunit sigma                   |
| 1464214 | 1499122 | 34908 OXZ26919.1 | B9N49_07100 | 1471116 | 1472459 | -1 MATE family efflux transporter                 |
| 1464214 | 1499122 | 34908 OXZ26920.1 | B9N49_07105 | 1472491 | 1474236 | -1 ABC transporter permease                       |
| 1464214 | 1499122 | 34908 OXZ26921.1 | B9N49_07110 | 1474229 | 1476019 | -1 ABC transporter ATP-binding protein            |
| 1464214 | 1499122 | 34908 OXZ26922.1 | B9N49_07115 | 1476009 | 1477475 | -1 ABC transporter                                |
| 1464214 | 1499122 | 34908 OXZ26923.1 | B9N49_07120 | 1477460 | 1478161 | -1 ABC transporter permease                       |
| 1464214 | 1499122 | 34908 OXZ26924.1 | B9N49_07125 | 1478164 | 1478760 | -1 hypothetical protein                           |
| 1464214 | 1499122 | 34908 OXZ26925.1 | B9N49_07130 | 1478902 | 1479540 | -1 TetR family transcriptional regulator          |
| 1464214 | 1499122 | 34908 OXZ26926.1 | B9N49_07135 | 1479648 | 1480358 | -1 hypothetical protein                           |
| 1464214 | 1499122 | 34908 OXZ26927.1 | B9N49_07140 | 1480375 | 1481460 | -1 hypothetical protein                           |
| 1464214 | 1499122 | 34908 OXZ26928.1 | B9N49_07145 | 1481471 | 1482445 | -1 hypothetical protein                           |
| 1464214 | 1499122 | 34908 OXZ26929.1 | B9N49_07150 | 1482438 | 1487345 | -1 hypothetical protein                           |
| 1464214 | 1499122 | 34908 OXZ26930.1 | B9N49_07155 | 1487345 | 1487614 | -1 hypothetical protein                           |
| 1464214 | 1499122 | 34908 OXZ26931.1 | B9N49_07160 | 1487619 | 1488635 | -1 hypothetical protein                           |
| 1464214 | 1499122 | 34908 OXZ26932.1 | B9N49_07165 | 1488653 | 1490071 | -1 hypothetical protein                           |
| 1464214 | 1499122 | 34908 OXZ26933.1 | B9N49_07170 | 1490082 | 1493816 | -1 hypothetical protein                           |
| 1464214 | 1499122 | 34908 OXZ26780.1 | B9N49_07175 | 1494883 | 1495941 | -1 conjugal transfer protein TraG                 |
| 1464214 | 1499122 | 34908 OXZ26781.1 | B9N49_07180 | 1495986 | 1496192 | -1 hypothetical protein                           |
| 1464214 | 1499122 | 34908 OXZ26782.1 | B9N49_07185 | 1496390 | 1496881 | -1 hypothetical protein                           |
| 1464214 | 1499122 | 34908 OXZ26783.1 | B9N49_07190 | 1496896 | 1497753 | -1 DNA replication protein                        |
| 1464214 | 1499122 | 34908 OXZ26784.1 | B9N49_07195 | 1497768 | 1498745 | -1 replication initiator RepA                     |
| 1464214 | 1499122 | 34908 OXZ26785.1 | B9N49_07200 | 1498832 | 1499122 | -1 hypothetical protein                           |
| 1487619 | 1499122 | 11503 OXZ26931.1 | B9N49_07160 | 1487619 | 1488635 | -1 hypothetical protein                           |
| 1487619 | 1499122 | 11503 OXZ26932.1 | B9N49_07165 | 1488653 | 1490071 | -1 hypothetical protein                           |
| 1487619 | 1499122 | 11503 OXZ26933.1 | B9N49_07170 | 1490082 | 1493816 | -1 hypothetical protein                           |
| 1487619 | 1499122 | 11503 OXZ26780.1 | B9N49_07175 | 1494883 | 1495941 | -1 conjugal transfer protein TraG                 |
| 1487619 | 1499122 | 11503 OXZ26781.1 | B9N49_07180 | 1495986 | 1496192 | -1 hypothetical protein                           |
| 1487619 | 1499122 | 11503 OXZ26782.1 | B9N49_07185 | 1496390 | 1496881 | -1 hypothetical protein                           |
| 1487619 | 1499122 | 11503 OXZ26783.1 | B9N49_07190 | 1496896 | 1497753 | -1 DNA replication protein                        |
| 1487619 | 1499122 | 11503 OXZ26784.1 | B9N49_07195 | 1497768 | 1498745 | -1 replication initiator RepA                     |
| 1487619 | 1499122 | 11503 OXZ26785.1 | B9N49_07200 | 1498832 | 1499122 | -1 hypothetical protein                           |
| 1535913 | 1544549 | 8636 OXZ26766.1  | B9N49_07380 | 1535913 | 1536200 | -1 cupin                                          |
| 1535913 | 1544549 | 8636 OXZ26767.1  | B9N49_07385 | 1536268 | 1536840 | -1 uracil-DNA glycosylase                         |
| 1535913 | 1544549 | 8636 OXZ26768.1  | B9N49_07390 | 1537611 | 1538900 | -1 hypothetical protein                           |
| 1535913 | 1544549 | 8636 OXZ26769.1  | B9N49_07395 | 1539274 | 1540941 | -1 DNA mismatch repair protein                    |
| 1535913 | 1544549 | 8636 OXZ26770.1  | B9N49_07400 | 1540951 | 1541985 | -1 DNA (cytosine-5-)-methyltransferase            |
| 1535913 | 1544549 | 8636 OXZ26771.1  | B9N49_07405 | 1542042 | 1542998 | -1 restriction endonuclease                       |
| 1535913 | 1544549 | 8636 OXZ26772.1  | B9N49_07410 | 1543008 | 1544030 | -1 DNA (cytosine-5-)-methyltransferase            |
| 1535913 | 1544549 | 8636 OXZ26773.1  | B9N49_07415 | 1544017 | 1544253 | -1 DNA-binding protein                            |
| 1535913 | 1544549 | 8636 OXZ26774.1  | B9N49_07420 | 1544361 | 1544549 | -1 hypothetical protein                           |
| 1612738 | 1655078 | 42340 OXZ26698.1 | B9N49_07720 | 1612738 | 1613161 | -1 MATE family efflux transporter                 |
| 1612738 | 1655078 | 42340 OXZ26699.1 | B9N49_07725 | 1613183 | 1614928 | -1 ABC transporter ATP-binding protein            |
| 1612738 | 1655078 | 42340 OXZ26700.1 | B9N49_07730 | 1614929 | 1616641 | -1 ABC transporter ATP-binding protein            |
| 1612738 | 1655078 | 42340 OXZ26701.1 | B9N49_07735 | 1616658 | 1618166 | -1 ABC transporter ATP-binding protein            |
| 1612738 | 1655078 | 42340 OXZ26702.1 | B9N49_07740 | 1618154 | 1618828 | -1 hypothetical protein                           |
| 1612738 | 1655078 | 42340 OXZ26703.1 | B9N49_07745 | 1618846 | 1619448 | -1 hypothetical protein                           |
| 1612738 | 1655078 | 42340 OXZ26707.1 | B9N49_07750 | 1619590 | 1620561 | -1 AraC family transcriptional regulator          |
| 1612738 | 1655078 | 42340 OXZ26704.1 | B9N49_07755 | 1620591 | 1621352 | -1 alpha/beta hydrolase                           |
| 1612738 | 1655078 | 42340 OXZ26705.1 | B9N49_07760 | 1621336 | 1622415 | -1 semialdehyde dehydrogenase                     |
| 1612738 | 1655078 | 42340 OXZ26706.1 | B9N49_07765 | 1622464 | 1627974 | -1 non-ribosomal peptide synthetase               |

|         |         |                  |             |         |         |                                                  |
|---------|---------|------------------|-------------|---------|---------|--------------------------------------------------|
| 1612738 | 1655078 | 42340 OXZ26708.1 | B9N49_07770 | 1627994 | 1629048 | -1 hypothetical protein                          |
| 1612738 | 1655078 | 42340 OXZ26697.1 | B9N49_07775 | 1630103 | 1631170 | -1 MATE family efflux transporter                |
| 1612738 | 1655078 | 42340 OXZ26589.1 | B9N49_07780 | 1632171 | 1632409 | 1 IS30 family transposase                        |
| 1612738 | 1655078 | 42340 OXZ26590.1 | B9N49_07785 | 1632518 | 1633267 | -1 phosphorylase                                 |
| 1612738 | 1655078 | 42340 OXZ26591.1 | B9N49_07790 | 1633527 | 1635131 | -1 macrolide ABC transporter ATP-binding protein |
| 1612738 | 1655078 | 42340            | B9N49_07795 | 1635454 | 1635747 | -1 transposase                                   |
| 1612738 | 1655078 | 42340 OXZ26592.1 | B9N49_07800 | 1635859 | 1636473 | -1 hypothetical protein                          |
| 1612738 | 1655078 | 42340 OXZ26593.1 | B9N49_07805 | 1636678 | 1638042 | -1 ABC transporter ATP-binding protein           |
| 1612738 | 1655078 | 42340 OXZ26594.1 | B9N49_07810 | 1638030 | 1638725 | -1 cobalt ABC transporter permease               |
| 1612738 | 1655078 | 42340 OXZ26595.1 | B9N49_07815 | 1638725 | 1639309 | -1 hypothetical protein                          |
| 1612738 | 1655078 | 42340 OXZ26596.1 | B9N49_07820 | 1639369 | 1640712 | -1 MATE family efflux transporter                |
| 1612738 | 1655078 | 42340 OXZ26597.1 | B9N49_07825 | 1640724 | 1642445 | -1 ABC transporter ATP-binding protein           |
| 1612738 | 1655078 | 42340 OXZ26598.1 | B9N49_07830 | 1642429 | 1644183 | -1 ABC transporter ATP-binding protein           |
| 1612738 | 1655078 | 42340            | B9N49_07835 | 1644344 | 1645335 | 1 AraC family transcriptional regulator          |
| 1612738 | 1655078 | 42340            | B9N49_07840 | 1645700 | 1646460 | -1 hypothetical protein                          |
| 1612738 | 1655078 | 42340 OXZ26599.1 | B9N49_07845 | 1646453 | 1648189 | -1 multidrug ABC transporter ATP-binding protein |
| 1612738 | 1655078 | 42340 OXZ26600.1 | B9N49_07850 | 1648182 | 1649903 | -1 ABC transporter ATP-binding protein           |
| 1612738 | 1655078 | 42340 OXZ26601.1 | B9N49_07855 | 1649903 | 1651366 | -1 ABC transporter                               |
| 1612738 | 1655078 | 42340 OXZ26602.1 | B9N49_07860 | 1651368 | 1652039 | -1 cobalt transporter                            |
| 1612738 | 1655078 | 42340 OXZ26603.1 | B9N49_07865 | 1652036 | 1652626 | -1 hypothetical protein                          |
| 1612738 | 1655078 | 42340 OXZ26604.1 | B9N49_07870 | 1652693 | 1653670 | -1 AraC family transcriptional regulator         |
| 1612738 | 1655078 | 42340 OXZ26605.1 | B9N49_07875 | 1653680 | 1654264 | -1 TetR family transcriptional regulator         |
| 1612738 | 1655078 | 42340 OXZ26606.1 | B9N49_07880 | 1654722 | 1655078 | 1 plasmid mobilization relaxosome protein MobC   |
| 1612738 | 1618828 | 6090 OXZ26698.1  | B9N49_07720 | 1612738 | 1613161 | -1 MATE family efflux transporter                |
| 1612738 | 1618828 | 6090 OXZ26699.1  | B9N49_07725 | 1613183 | 1614928 | -1 ABC transporter ATP-binding protein           |
| 1612738 | 1618828 | 6090 OXZ26700.1  | B9N49_07730 | 1614929 | 1616641 | -1 ABC transporter ATP-binding protein           |
| 1612738 | 1618828 | 6090 OXZ26701.1  | B9N49_07735 | 1616658 | 1618166 | -1 ABC transporter ATP-binding protein           |
| 1612738 | 1618828 | 6090 OXZ26702.1  | B9N49_07740 | 1618154 | 1618828 | -1 hypothetical protein                          |
| 1635454 | 1640712 | 5258             | B9N49_07795 | 1635454 | 1635747 | -1 transposase                                   |
| 1635454 | 1640712 | 5258 OXZ26592.1  | B9N49_07800 | 1635859 | 1636473 | -1 hypothetical protein                          |
| 1635454 | 1640712 | 5258 OXZ26593.1  | B9N49_07805 | 1636678 | 1638042 | -1 ABC transporter ATP-binding protein           |
| 1635454 | 1640712 | 5258 OXZ26594.1  | B9N49_07810 | 1638030 | 1638725 | -1 cobalt ABC transporter permease               |
| 1635454 | 1640712 | 5258 OXZ26595.1  | B9N49_07815 | 1638725 | 1639309 | -1 hypothetical protein                          |
| 1635454 | 1640712 | 5258 OXZ26596.1  | B9N49_07820 | 1639369 | 1640712 | -1 MATE family efflux transporter                |
| 1663712 | 1668015 | 4303 OXZ26611.1  | B9N49_07920 | 1663029 | 1663721 | -1 MBL fold metallo-hydrolase                    |
| 1663712 | 1668015 | 4303 OXZ26612.1  | B9N49_07925 | 1663712 | 1664101 | -1 cytidine deaminase                            |
| 1663712 | 1668015 | 4303 OXZ26613.1  | B9N49_07930 | 1664147 | 1664671 | -1 hypothetical protein                          |
| 1663712 | 1668015 | 4303 OXZ26614.1  | B9N49_07935 | 1664888 | 1665619 | 23S rRNA (adenine(2058)-N(6))-                   |
| 1663712 | 1668015 | 4303 OXZ26615.1  | B9N49_07940 | 1666115 | 1666396 | -1 methyltransferase Erm(A)                      |
| 1663712 | 1668015 | 4303             | B9N49_07945 | 1666428 | 1667165 | -1 hypothetical protein                          |
| 1663712 | 1668015 | 4303 OXZ26616.1  | B9N49_07950 | 1667146 | 1668015 | -1 SAM-dependent methyltransferase               |
| 1666115 | 1722368 | 56253 OXZ26615.1 | B9N49_07940 | 1666115 | 1666396 | -1 hypothetical protein                          |
| 1666115 | 1722368 | 56253            | B9N49_07945 | 1666428 | 1667165 | -1 SAM-dependent methyltransferase               |
| 1666115 | 1722368 | 56253 OXZ26616.1 | B9N49_07950 | 1667146 | 1668015 | -1 hypothetical protein                          |
| 1666115 | 1722368 | 56253 OXZ26617.1 | B9N49_07955 | 1668719 | 1670290 | -1 recombinase family protein                    |
| 1666115 | 1722368 | 56253 OXZ26618.1 | B9N49_07960 | 1670283 | 1670699 | -1 integrase                                     |
| 1666115 | 1722368 | 56253 OXZ26619.1 | B9N49_07965 | 1670692 | 1672254 | -1 recombinase family protein                    |
| 1666115 | 1722368 | 56253 OXZ26620.1 | B9N49_07970 | 1672314 | 1672523 | -1 hypothetical protein                          |
| 1666115 | 1722368 | 56253 OXZ26621.1 | B9N49_07975 | 1672887 | 1674623 | -1 multidrug ABC transporter ATP-binding protein |
| 1666115 | 1722368 | 56253 OXZ26622.1 | B9N49_07980 | 1674616 | 1676334 | -1 ABC transporter ATP-binding protein           |
| 1666115 | 1722368 | 56253 OXZ26623.1 | B9N49_07985 | 1676339 | 1676929 | -1 TetR family transcriptional regulator         |
| 1666115 | 1722368 | 56253 OXZ26624.1 | B9N49_07990 | 1677106 | 1677915 | -1 lysozyme                                      |
| 1666115 | 1722368 | 56253 OXZ26625.1 | B9N49_07995 | 1677916 | 1678317 | -1 holin                                         |
| 1666115 | 1722368 | 56253 OXZ26626.1 | B9N49_08000 | 1678319 | 1679698 | -1 hypothetical protein                          |
| 1666115 | 1722368 | 56253 OXZ26627.1 | B9N49_08005 | 1679685 | 1681556 | -1 hypothetical protein                          |
| 1666115 | 1722368 | 56253 OXZ26628.1 | B9N49_08010 | 1681556 | 1681918 | -1 hypothetical protein                          |
| 1666115 | 1722368 | 56253 OXZ26629.1 | B9N49_08015 | 1681918 | 1684983 | -1 phage tail tape measure protein               |
| 1666115 | 1722368 | 56253 OXZ26630.1 | B9N49_08020 | 1685073 | 1685396 | 1 prevent-host-death protein                     |
| 1666115 | 1722368 | 56253 OXZ26631.1 | B9N49_08025 | 1685393 | 1685722 | 1 addiction module toxin RelE                    |
| 1666115 | 1722368 | 56253 OXZ26632.1 | B9N49_08030 | 1685901 | 1686257 | -1 hypothetical protein                          |
| 1666115 | 1722368 | 56253 OXZ26633.1 | B9N49_08035 | 1686260 | 1686856 | -1 phage tail protein                            |
| 1666115 | 1722368 | 56253 OXZ26634.1 | B9N49_08040 | 1686846 | 1687025 | -1 hypothetical protein                          |
| 1666115 | 1722368 | 56253 OXZ26635.1 | B9N49_08045 | 1687018 | 1687344 | -1 hypothetical protein                          |
| 1666115 | 1722368 | 56253 OXZ26636.1 | B9N49_08050 | 1687337 | 1687717 | -1 hypothetical protein                          |
| 1666115 | 1722368 | 56253 OXZ26637.1 | B9N49_08055 | 1687714 | 1688046 | -1 phage head-tail adapter protein               |
| 1666115 | 1722368 | 56253 OXZ26638.1 | B9N49_08060 | 1688046 | 1688318 | -1 AraC family transcriptional regulator         |
| 1666115 | 1722368 | 56253 OXZ26639.1 | B9N49_08065 | 1688329 | 1689519 | -1 phage major capsid protein                    |
| 1666115 | 1722368 | 56253 OXZ26640.1 | B9N49_08070 | 1689522 | 1690208 | -1 peptidase                                     |
| 1666115 | 1722368 | 56253 OXZ26641.1 | B9N49_08075 | 1690198 | 1691472 | -1 phage portal protein                          |
| 1666115 | 1722368 | 56253 OXZ26642.1 | B9N49_08080 | 1691499 | 1692395 | -1 cell filamentation protein Fic                |
| 1666115 | 1722368 | 56253 OXZ26643.1 | B9N49_08085 | 1692496 | 1694085 | -1 terminase                                     |
| 1666115 | 1722368 | 56253 OXZ26644.1 | B9N49_08090 | 1694178 | 1694408 | -1 hypothetical protein                          |
| 1666115 | 1722368 | 56253 OXZ26645.1 | B9N49_08095 | 1694409 | 1694741 | -1 hypothetical protein                          |
| 1666115 | 1722368 | 56253 OXZ26646.1 | B9N49_08100 | 1694822 | 1695052 | -1 DUF4314 domain-containing protein             |
| 1666115 | 1722368 | 56253 OXZ26647.1 | B9N49_08105 | 1695096 | 1696538 | -1 DNA (cytosine-5-)-methyltransferase           |
| 1666115 | 1722368 | 56253 OXZ26648.1 | B9N49_08110 | 1696531 | 1697766 | -1 DNA modification methylase                    |
| 1666115 | 1722368 | 56253 OXZ26649.1 | B9N49_08115 | 1697763 | 1698545 | -1 S-adenosylmethionine synthetase               |
| 1666115 | 1722368 | 56253 OXZ26650.1 | B9N49_08120 | 1698551 | 1699198 | -1 terminase                                     |
| 1666115 | 1722368 | 56253 OXZ26651.1 | B9N49_08125 | 1699252 | 1699608 | -1 HNH endonuclease                              |
| 1666115 | 1722368 | 56253 OXZ26652.1 | B9N49_08130 | 1699798 | 1700055 | 1 AbrB family transcriptional regulator          |
| 1666115 | 1722368 | 56253 OXZ26653.1 | B9N49_08135 | 1700055 | 1700321 | 1 cytotoxin                                      |
| 1666115 | 1722368 | 56253 OXZ26654.1 | B9N49_08140 | 1700398 | 1700799 | -1 hypothetical protein                          |
| 1666115 | 1722368 | 56253 OXZ26655.1 | B9N49_08145 | 1700847 | 1702190 | -1 DEAD/DEAH box helicase                        |
| 1666115 | 1722368 | 56253 OXZ26656.1 | B9N49_08150 | 1702191 | 1702472 | -1 nuclease                                      |

|         |         |                  |             |         |         |                                                                                   |
|---------|---------|------------------|-------------|---------|---------|-----------------------------------------------------------------------------------|
| 1666115 | 1722368 | 56253 OXZ26657.1 | B9N49_08155 | 1702430 | 1702687 | -1 hypothetical protein                                                           |
| 1666115 | 1722368 | 56253 OXZ26658.1 | B9N49_08160 | 1702950 | 1705151 | -1 DNA primase                                                                    |
| 1666115 | 1722368 | 56253 OXZ26659.1 | B9N49_08165 | 1705152 | 1705538 | -1 DUF4406 domain-containing protein                                              |
| 1666115 | 1722368 | 56253 OXZ26660.1 | B9N49_08170 | 1705531 | 1705731 | -1 hypothetical protein                                                           |
| 1666115 | 1722368 | 56253 OXZ26661.1 | B9N49_08175 | 1705745 | 1708603 | -1 hypothetical protein                                                           |
| 1666115 | 1722368 | 56253 OXZ26662.1 | B9N49_08180 | 1708578 | 1708778 | -1 hypothetical protein                                                           |
| 1666115 | 1722368 | 56253 OXZ26663.1 | B9N49_08185 | 1708788 | 1709375 | -1 hypothetical protein                                                           |
| 1666115 | 1722368 | 56253 OXZ26664.1 | B9N49_08190 | 1709341 | 1710453 | -1 nuclease                                                                       |
| 1666115 | 1722368 | 56253 OXZ26665.1 | B9N49_08195 | 1710453 | 1710752 | -1 hypothetical protein                                                           |
| 1666115 | 1722368 | 56253 OXZ26666.1 | B9N49_08200 | 1710694 | 1711065 | -1 hypothetical protein                                                           |
| 1666115 | 1722368 | 56253 OXZ26667.1 | B9N49_08205 | 1711053 | 1711571 | -1 RNA polymerase subunit sigma-70                                                |
| 1666115 | 1722368 | 56253 OXZ26668.1 | B9N49_08210 | 1712143 | 1712928 | -1 hypothetical protein                                                           |
| 1666115 | 1722368 | 56253 OXZ26669.1 | B9N49_08215 | 1712931 | 1713302 | -1 transcriptional regulator<br>23S rRNA (uracil(1939)-C(5))-methyltransferase    |
| 1666115 | 1722368 | 56253 OXZ26670.1 | B9N49_08220 | 1713553 | 1714767 | -1 RlmD                                                                           |
| 1666115 | 1722368 | 56253 OXZ26671.1 | B9N49_08225 | 1714860 | 1716656 | -1 ABC transporter                                                                |
| 1666115 | 1722368 | 56253 OXZ26672.1 | B9N49_08230 | 1716649 | 1718409 | -1 multidrug ABC transporter ATP-binding protein                                  |
| 1666115 | 1722368 | 56253 OXZ26673.1 | B9N49_08235 | 1718384 | 1718860 | -1 MarR family transcriptional regulator                                          |
| 1666115 | 1722368 | 56253 OXZ26674.1 | B9N49_08240 | 1719023 | 1720324 | -1 phosphomethylpyrimidine synthase<br>cyclic pyranopterin monophosphate synthase |
| 1666115 | 1722368 | 56253 OXZ26675.1 | B9N49_08245 | 1720505 | 1721419 | -1 MoaC                                                                           |
| 1666115 | 1722368 | 56253 OXZ26676.1 | B9N49_08250 | 1721421 | 1722368 | -1 GTP 3',8-cyclase MoaA                                                          |
| 1904216 | 1927243 | 23027 OXZ26463.1 | B9N49_09015 | 1904216 | 1904974 | -1 metal-dependent hydrolase                                                      |
| 1904216 | 1927243 | 23027 OXZ26464.1 | B9N49_09020 | 1905100 | 1905570 | 1 aminoacyl-tRNA deacylase                                                        |
| 1904216 | 1927243 | 23027 OXZ26465.1 | B9N49_09025 | 1905573 | 1906877 | 1 glutamate--cysteine ligase                                                      |
| 1904216 | 1927243 | 23027 OXZ26466.1 | B9N49_09030 | 1906870 | 1908180 | 1 glutathionylspermidine synthase                                                 |
| 1904216 | 1927243 | 23027 OXZ26467.1 | B9N49_09035 | 1908279 | 1908548 | -1 Txe/YoeB family addiction module toxin                                         |
| 1904216 | 1927243 | 23027 OXZ26468.1 | B9N49_09040 | 1908542 | 1908790 | -1 prevent-host-death protein                                                     |
| 1904216 | 1927243 | 23027 OXZ26469.1 | B9N49_09045 | 1908972 | 1909391 | 1 CMP deaminase                                                                   |
| 1904216 | 1927243 | 23027 OXZ26470.1 | B9N49_09050 | 1909403 | 1912822 | 1 pyruvate carboxylase                                                            |
| 1904216 | 1927243 | 23027 OXZ26471.1 | B9N49_09055 | 1912883 | 1913277 | -1 hypothetical protein                                                           |
| 1904216 | 1927243 | 23027 OXZ26373.1 | B9N49_09060 | 1914278 | 1914416 | -1 transposase                                                                    |
| 1904216 | 1927243 | 23027 OXZ26374.1 | B9N49_09065 | 1914481 | 1914885 | -1 DUF3139 domain-containing protein                                              |
| 1904216 | 1927243 | 23027 OXZ26375.1 | B9N49_09070 | 1915016 | 1915258 | 1 cell division protein FtsW                                                      |
| 1904216 | 1927243 | 23027 OXZ26376.1 | B9N49_09075 | 1915362 | 1915769 | 1 hypothetical protein                                                            |
| 1904216 | 1927243 | 23027 OXZ26377.1 | B9N49_09080 | 1915786 | 1916292 | -1 thiol reductase thioredoxin                                                    |
| 1904216 | 1927243 | 23027 OXZ26378.1 | B9N49_09085 | 1916397 | 1916741 | -1 hypothetical protein                                                           |
| 1904216 | 1927243 | 23027 OXZ26379.1 | B9N49_09090 | 1916809 | 1917498 | -1 hypothetical protein                                                           |
| 1904216 | 1927243 | 23027 OXZ26380.1 | B9N49_09095 | 1917495 | 1922597 | -1 FMN-binding domain-containing protein                                          |
| 1904216 | 1927243 | 23027 OXZ26446.1 | B9N49_09100 | 1922842 | 1923795 | -1 2-dehydropantoate 2-reductase                                                  |
| 1904216 | 1927243 | 23027 OXZ26381.1 | B9N49_09105 | 1923815 | 1925464 | -1 inorganic pyrophosphatase                                                      |
| 1904216 | 1927243 | 23027 OXZ26382.1 | B9N49_09110 | 1925629 | 1926150 | 1 N-carbamoylsarcosine amidohydrolase                                             |
| 1904216 | 1927243 | 23027 OXZ26383.1 | B9N49_09115 | 1926192 | 1926818 | 1 hypothetical protein                                                            |
| 1904216 | 1927243 | 23027 OXZ26384.1 | B9N49_09120 | 1926887 | 1927243 | -1 hypothetical protein                                                           |
| 1978424 | 2050817 | 72393 OXZ26444.1 | B9N49_09450 | 1978424 | 1978642 | 1 hypothetical protein                                                            |
| 1978424 | 2050817 | 72393 OXZ26445.1 | B9N49_09455 | 1978652 | 1978798 | 1 YvrJ family protein                                                             |
| 1978424 | 2050817 | 72393 OXZ26339.1 | B9N49_09620 | 1982645 | 1984502 | -1 hypothetical protein                                                           |
| 1978424 | 2050817 | 72393 OXZ26340.1 | B9N49_09625 | 1984526 | 1985835 | -1 2,3-dihydroxybenzoate-AMP ligase                                               |
| 1978424 | 2050817 | 72393 OXZ26306.1 | B9N49_09730 | 1990594 | 1990988 | -1 IS3 family transposase                                                         |
| 1978424 | 2050817 | 72393 OXZ26307.1 | B9N49_09735 | 1991183 | 1991626 | -1 transposase                                                                    |
| 1978424 | 2050817 | 72393 OXZ26272.1 | B9N49_09745 | 1992786 | 1993660 | 1 IS30 family transposase                                                         |
| 1978424 | 2050817 | 72393 OXZ26341.1 | B9N49_09560 | 1994661 | 1995031 | -1 thioesterase                                                                   |
| 1978424 | 2050817 | 72393 OXZ26342.1 | B9N49_09565 | 1995194 | 1995565 | -1 transcriptional regulator                                                      |
| 1978424 | 2050817 | 72393 OXZ26343.1 | B9N49_09570 | 1995941 | 1996297 | 1 plasmid mobilization relaxosome protein MobC                                    |
| 1978424 | 2050817 | 72393 OXZ26344.1 | B9N49_09575 | 1996299 | 1997630 | 1 endonuclease                                                                    |
| 1978424 | 2050817 | 72393 OXZ26345.1 | B9N49_09580 | 1998089 | 1999705 | -1 ABC transporter-like protein                                                   |
| 1978424 | 2050817 | 72393 OXZ26346.1 | B9N49_09585 | 1999720 | 2001807 | -1 ABC transporter permease                                                       |
| 1978424 | 2050817 | 72393 OXZ26347.1 | B9N49_09590 | 2001809 | 2002483 | -1 ABC transporter ATP-binding protein                                            |
| 1978424 | 2050817 | 72393 OXZ26348.1 | B9N49_09595 | 2002493 | 2003836 | -1 radical SAM domain-containing protein                                          |
| 1978424 | 2050817 | 72393 OXZ26349.1 | B9N49_09600 | 2004202 | 2004630 | -1 hypothetical protein                                                           |
| 1978424 | 2050817 | 72393 OXZ26350.1 | B9N49_09605 | 2004643 | 2004906 | -1 hypothetical protein                                                           |
| 1978424 | 2050817 | 72393 OXZ26351.1 | B9N49_09610 | 2004900 | 2005469 | -1 hypothetical protein                                                           |
| 1978424 | 2050817 | 72393 OXZ26352.1 | B9N49_09615 | 2005823 | 2006014 | 1 hypothetical protein                                                            |
| 1978424 | 2050817 | 72393 OXZ26328.1 | B9N49_09680 | 2007188 | 2007334 | 1 hypothetical protein                                                            |
| 1978424 | 2050817 | 72393 OXZ26329.1 | B9N49_09685 | 2007336 | 2008199 | 1 hypothetical protein                                                            |
| 1978424 | 2050817 | 72393 OXZ26330.1 | B9N49_09690 | 2008217 | 2008474 | 1 hypothetical protein                                                            |
| 1978424 | 2050817 | 72393            | B9N49_09695 | 2008474 | 2008623 | 1 conjugal transfer protein                                                       |
| 1978424 | 2050817 | 72393 OXZ26331.1 | B9N49_09700 | 2008662 | 2008749 | -1 hypothetical protein                                                           |
| 1978424 | 2050817 | 72393 OXZ26178.1 | B9N49_09775 | 2009750 | 2010348 | 1 hypothetical protein                                                            |
| 1978424 | 2050817 | 72393 OXZ26337.1 | B9N49_09630 | 2011349 | 2013215 | -1 non-ribosomal peptide synthetase                                               |
| 1978424 | 2050817 | 72393 OXZ26338.1 | B9N49_09635 | 2013228 | 2014531 | -1 2,3-dihydroxybenzoate-AMP ligase                                               |
| 1978424 | 2050817 | 72393 OXZ26273.1 | B9N49_09740 | 2015532 | 2016545 | -1 elongation factor Tu                                                           |
| 1978424 | 2050817 | 72393 OXZ26181.1 | B9N49_09755 | 2017546 | 2017915 | -1 phage antirepressor Ant                                                        |
| 1978424 | 2050817 | 72393 OXZ26182.1 | B9N49_09760 | 2017912 | 2018226 | -1 hypothetical protein                                                           |
| 1978424 | 2050817 | 72393 OXZ26308.1 | B9N49_09720 | 2019290 | 2019847 | 1 transposase                                                                     |
| 1978424 | 2050817 | 72393 OXZ26309.1 | B9N49_09725 | 2019874 | 2020704 | 1 hypothetical protein                                                            |
| 1978424 | 2050817 | 72393 OXZ26332.1 | B9N49_09670 | 2021838 | 2023118 | -1 group II intron reverse transcriptase/maturase                                 |
| 1978424 | 2050817 | 72393            | B9N49_09650 | 2024585 | 2025400 | 1 conjugal transfer protein TraG                                                  |
| 1978424 | 2050817 | 72393 OXZ26333.1 | B9N49_09655 | 2025552 | 2026418 | 1 CAAX protease                                                                   |
| 1978424 | 2050817 | 72393 OXZ26334.1 | B9N49_09660 | 2026609 | 2026932 | 1 single-stranded DNA-binding protein                                             |
| 1978424 | 2050817 | 72393 OXZ26335.1 | B9N49_09665 | 2026933 | 2027064 | 1 hypothetical protein                                                            |
| 1978424 | 2050817 | 72393 OXZ26336.1 | B9N49_09640 | 2028341 | 2030200 | -1 group II intron reverse transcriptase/maturase                                 |
| 1978424 | 2050817 | 72393 OXZ26179.1 | B9N49_09765 | 2031943 | 2032029 | 1 hypothetical protein                                                            |
| 1978424 | 2050817 | 72393 OXZ26180.1 | B9N49_09770 | 2032256 | 2032620 | -1 hypothetical protein                                                           |
| 1978424 | 2050817 | 72393 OXZ26353.1 | B9N49_09460 | 2033621 | 2033706 | 1 hypothetical protein                                                            |
| 1978424 | 2050817 | 72393 OXZ26354.1 | B9N49_09465 | 2033784 | 2034179 | -1 hypothetical protein                                                           |
| 1978424 | 2050817 | 72393 OXZ26355.1 | B9N49_09470 | 2034121 | 2034435 | -1 hypothetical protein                                                           |



|         |         |                  |             |         |         |                                                                  |
|---------|---------|------------------|-------------|---------|---------|------------------------------------------------------------------|
| 1978424 | 2050817 | 72393 OXZ26356.1 | B9N49_09475 | 2034641 | 2034817 | -1 lantibiotic salivaricin M precursor                           |
| 1978424 | 2050817 | 72393 OXZ26357.1 | B9N49_09480 | 2034941 | 2035561 | 1 DNA-binding protein                                            |
| 1978424 | 2050817 | 72393 OXZ26358.1 | B9N49_09485 | 2035862 | 2037409 | 1 hypothetical protein                                           |
| 1978424 | 2050817 | 72393 OXZ26359.1 | B9N49_09490 | 2037381 | 2037986 | 1 DNA-binding response regulator                                 |
| 1978424 | 2050817 | 72393 OXZ26360.1 | B9N49_09495 | 2038268 | 2040454 | 1 radical SAM protein<br>CXXX repeat peptide modification system |
| 1978424 | 2050817 | 72393 OXZ26361.1 | B9N49_09500 | 2040456 | 2040722 | 1 protein                                                        |
| 1978424 | 2050817 | 72393 OXZ26362.1 | B9N49_09505 | 2040715 | 2042352 | 1 ABC transporter permease                                       |
| 1978424 | 2050817 | 72393 OXZ26363.1 | B9N49_09510 | 2042936 | 2044330 | 1 hypothetical protein                                           |
| 1978424 | 2050817 | 72393 OXZ26364.1 | B9N49_09515 | 2044333 | 2045364 | 1 hypothetical protein                                           |
| 1978424 | 2050817 | 72393 OXZ26365.1 | B9N49_09520 | 2045515 | 2046402 | 1 hypothetical protein                                           |
| 1978424 | 2050817 | 72393 OXZ26366.1 | B9N49_09525 | 2046419 | 2046700 | 1 hypothetical protein                                           |
| 1978424 | 2050817 | 72393 OXZ26367.1 | B9N49_09530 | 2046712 | 2047179 | 1 hypothetical protein                                           |
| 1978424 | 2050817 | 72393 OXZ26368.1 | B9N49_09535 | 2047188 | 2047391 | 1 hypothetical protein                                           |
| 1978424 | 2050817 | 72393 OXZ26369.1 | B9N49_09540 | 2047388 | 2048299 | 1 hypothetical protein                                           |
| 1978424 | 2050817 | 72393 OXZ26370.1 | B9N49_09545 | 2048325 | 2049098 | 1 hypothetical protein                                           |
| 1978424 | 2050817 | 72393 OXZ26371.1 | B9N49_09550 | 2049095 | 2050033 | 1 hypothetical protein                                           |
| 1978424 | 2050817 | 72393 OXZ26372.1 | B9N49_09555 | 2050026 | 2050817 | 1 hypothetical protein                                           |
| 1978652 | 1985835 | 7183 OXZ26445.1  | B9N49_09455 | 1978652 | 1978798 | 1 YvrJ family protein                                            |
| 1978652 | 1985835 | 7183 OXZ26339.1  | B9N49_09620 | 1982645 | 1984502 | -1 hypothetical protein                                          |
| 1978652 | 1985835 | 7183 OXZ26340.1  | B9N49_09625 | 1984526 | 1985835 | -1 2,3-dihydroxybenzoate-AMP ligase                              |
| 1991183 | 2004906 | 13723 OXZ26307.1 | B9N49_09735 | 1991183 | 1991626 | -1 transposase                                                   |
| 1991183 | 2004906 | 13723 OXZ26272.1 | B9N49_09745 | 1992786 | 1993660 | 1 IS30 family transposase                                        |
| 1991183 | 2004906 | 13723 OXZ26341.1 | B9N49_09560 | 1994661 | 1995031 | -1 thioesterase                                                  |
| 1991183 | 2004906 | 13723 OXZ26342.1 | B9N49_09565 | 1995194 | 1995565 | -1 transcriptional regulator                                     |
| 1991183 | 2004906 | 13723 OXZ26343.1 | B9N49_09570 | 1995941 | 1996297 | 1 plasmid mobilization relaxosome protein MobC                   |
| 1991183 | 2004906 | 13723 OXZ26344.1 | B9N49_09575 | 1996299 | 1997630 | 1 endonuclease                                                   |
| 1991183 | 2004906 | 13723 OXZ26345.1 | B9N49_09580 | 1998089 | 1999705 | -1 ABC transporter-like protein                                  |
| 1991183 | 2004906 | 13723 OXZ26346.1 | B9N49_09585 | 1999720 | 2001807 | -1 ABC transporter permease                                      |
| 1991183 | 2004906 | 13723 OXZ26347.1 | B9N49_09590 | 2001809 | 2002483 | -1 ABC transporter ATP-binding protein                           |
| 1991183 | 2004906 | 13723 OXZ26348.1 | B9N49_09595 | 2002493 | 2003836 | -1 radical SAM domain-containing protein                         |
| 1991183 | 2004906 | 13723 OXZ26349.1 | B9N49_09600 | 2004202 | 2004630 | -1 hypothetical protein                                          |
| 1991183 | 2004906 | 13723 OXZ26350.1 | B9N49_09605 | 2004643 | 2004906 | -1 hypothetical protein                                          |
| 1991183 | 2004906 | 13723 OXZ26351.1 | B9N49_09610 | 2004900 | 2005469 | -1 hypothetical protein                                          |
| 2017546 | 2026418 | 8872 OXZ26181.1  | B9N49_09755 | 2017546 | 2017915 | -1 phage antirepressor Ant                                       |
| 2017546 | 2026418 | 8872 OXZ26182.1  | B9N49_09760 | 2017912 | 2018226 | -1 hypothetical protein                                          |
| 2017546 | 2026418 | 8872 OXZ26308.1  | B9N49_09720 | 2019290 | 2019847 | 1 transposase                                                    |
| 2017546 | 2026418 | 8872 OXZ26309.1  | B9N49_09725 | 2019874 | 2020704 | 1 hypothetical protein                                           |
| 2017546 | 2026418 | 8872 OXZ26332.1  | B9N49_09670 | 2021838 | 2023118 | -1 group II intron reverse transcriptase/maturase                |
| 2017546 | 2026418 | 8872             | B9N49_09650 | 2024585 | 2025400 | 1 conjugal transfer protein TraG                                 |
| 2017546 | 2026418 | 8872 OXZ26333.1  | B9N49_09655 | 2025552 | 2026418 | 1 CAAX protease                                                  |
| 2046419 | 2056025 | 9606 OXZ26366.1  | B9N49_09525 | 2046419 | 2046700 | 1 hypothetical protein                                           |
| 2046419 | 2056025 | 9606 OXZ26367.1  | B9N49_09530 | 2046712 | 2047179 | 1 hypothetical protein                                           |
| 2046419 | 2056025 | 9606 OXZ26368.1  | B9N49_09535 | 2047188 | 2047391 | 1 hypothetical protein                                           |
| 2046419 | 2056025 | 9606 OXZ26369.1  | B9N49_09540 | 2047388 | 2048299 | 1 hypothetical protein                                           |
| 2046419 | 2056025 | 9606 OXZ26370.1  | B9N49_09545 | 2048325 | 2049098 | 1 hypothetical protein                                           |
| 2046419 | 2056025 | 9606 OXZ26371.1  | B9N49_09550 | 2049095 | 2050033 | 1 hypothetical protein                                           |
| 2046419 | 2056025 | 9606 OXZ26372.1  | B9N49_09555 | 2050026 | 2050817 | 1 hypothetical protein                                           |
| 2046419 | 2056025 | 9606 OXZ26325.1  | B9N49_09705 | 2052644 | 2053152 | 1 thioesterase                                                   |
| 2046419 | 2056025 | 9606 OXZ26326.1  | B9N49_09710 | 2053142 | 2053834 | 1 4-phosphopantetheinyl transferase                              |
| 2046419 | 2056025 | 9606 OXZ26327.1  | B9N49_09715 | 2053834 | 2054243 | 1 2,3-dihydroxybenzoate-AMP ligase                               |
| 2046419 | 2056025 | 9606 OXZ26271.1  | B9N49_09750 | 2055244 | 2056025 | -1 hypothetical protein                                          |

**Table S3I: Predicted genomic islands in the genome of "F. nericia" T151023**

Shown are genes of genomic islands predicted by IslandViewer4

| Island start | Island end | Length | Gene name  | Locus       | Gene start | Gene end | Strand | Product                                                                                |
|--------------|------------|--------|------------|-------------|------------|----------|--------|----------------------------------------------------------------------------------------|
| 81511        | 88758      | 7247   | OXZ29531.1 | B9N51_00605 | 79542      | 81530    | 1      | exopolyphosphatase                                                                     |
| 81511        | 88758      | 7247   | OXZ29532.1 | B9N51_00610 | 81511      | 81957    | 1      | 50S ribosomal protein L9                                                               |
| 81511        | 88758      | 7247   | OXZ29533.1 | B9N51_00615 | 81991      | 83328    | 1      | replicative DNA helicase                                                               |
| 81511        | 88758      | 7247   | OXZ29534.1 | B9N51_00620 | 83325      | 83888    | 1      | GNAT family N-acetyltransferase                                                        |
| 81511        | 88758      | 7247   | OXZ29535.1 | B9N51_00625 | 83893      | 84651    | 1      | DNA replication protein                                                                |
| 81511        | 88758      | 7247   | OXZ29536.1 | B9N51_00630 | 84654      | 85631    | 1      | DNA replication protein DnaC                                                           |
| 81511        | 88758      | 7247   | OXZ29537.1 | B9N51_00635 | 85628      | 86272    | 1      | NAD(P)H-hydrate epimerase                                                              |
| 81511        | 88758      | 7247   | OXZ29538.1 | B9N51_00640 | 86777      | 87319    | 1      | ECF transporter S component                                                            |
| 81511        | 88758      | 7247   | OXZ29539.1 | B9N51_00645 | 87303      | 87989    | 1      | radical SAM protein                                                                    |
| 81511        | 88758      | 7247   | OXZ29540.1 | B9N51_00650 | 88054      | 88758    | 1      | hypothetical protein                                                                   |
| 143045       | 188929     | 45884  | OXZ29593.1 | B9N51_00925 | 143045     | 143674   | 1      | 50S ribosomal protein L3                                                               |
| 143045       | 188929     | 45884  | OXZ29594.1 | B9N51_00930 | 143690     | 144313   | 1      | 50S ribosomal protein L4                                                               |
| 143045       | 188929     | 45884  | OXZ29595.1 | B9N51_00935 | 144313     | 144603   | 1      | 50S ribosomal protein L23                                                              |
| 143045       | 188929     | 45884  | OXZ29596.1 | B9N51_00940 | 144620     | 145450   | 1      | 50S ribosomal protein L2                                                               |
| 143045       | 188929     | 45884  | OXZ29597.1 | B9N51_00945 | 145463     | 145747   | 1      | 30S ribosomal protein S19                                                              |
| 143045       | 188929     | 45884  | OXZ29598.1 | B9N51_00950 | 145765     | 146103   | 1      | 50S ribosomal protein L22                                                              |
| 143045       | 188929     | 45884  | OXZ29599.1 | B9N51_00955 | 146115     | 146849   | 1      | 30S ribosomal protein S3                                                               |
| 143045       | 188929     | 45884  | OXZ29600.1 | B9N51_00960 | 146871     | 147314   | 1      | 50S ribosomal protein L16                                                              |
| 143045       | 188929     | 45884  | OXZ29601.1 | B9N51_00965 | 147304     | 147510   | 1      | 50S ribosomal protein L29                                                              |
| 143045       | 188929     | 45884  | OXZ29602.1 | B9N51_00970 | 147516     | 147770   | 1      | 30S ribosomal protein S17                                                              |
| 143045       | 188929     | 45884  | OXZ29603.1 | B9N51_00975 | 147795     | 148163   | 1      | 50S ribosomal protein L14                                                              |
| 143045       | 188929     | 45884  | OXZ29604.1 | B9N51_00980 | 148182     | 148490   | 1      | 50S ribosomal protein L24                                                              |
| 143045       | 188929     | 45884  | OXZ29605.1 | B9N51_00985 | 148509     | 149051   | 1      | 50S ribosomal protein L5                                                               |
| 143045       | 188929     | 45884  | OXZ29606.1 | B9N51_00990 | 149064     | 149249   | 1      | 30S ribosomal protein S14 type Z                                                       |
| 143045       | 188929     | 45884  | OXZ29607.1 | B9N51_00995 | 149271     | 149666   | 1      | 30S ribosomal protein S8                                                               |
| 143045       | 188929     | 45884  | OXZ29608.1 | B9N51_01000 | 149693     | 150232   | 1      | 50S ribosomal protein L6                                                               |
| 143045       | 188929     | 45884  | OXZ29609.1 | B9N51_01005 | 150247     | 150609   | 1      | 50S ribosomal protein L18                                                              |
| 143045       | 188929     | 45884  | OXZ29610.1 | B9N51_01010 | 150630     | 151136   | 1      | 30S ribosomal protein S5                                                               |
| 143045       | 188929     | 45884  | OXZ29611.1 | B9N51_01015 | 151150     | 151332   | 1      | 50S ribosomal protein L30                                                              |
| 143045       | 188929     | 45884  | OXZ29612.1 | B9N51_01020 | 151344     | 151793   | 1      | 50S ribosomal protein L15                                                              |
| 143045       | 188929     | 45884  | OXZ29613.1 | B9N51_01025 | 151795     | 153069   | 1      | preprotein translocase subunit SecY                                                    |
| 143045       | 188929     | 45884  | OXZ29614.1 | B9N51_01030 | 153080     | 153727   | 1      | adenylate kinase                                                                       |
| 143045       | 188929     | 45884  | OXZ29615.1 | B9N51_01035 | 153733     | 154017   | 1      | KOW domain-containing protein                                                          |
| 143045       | 188929     | 45884  | OXZ29616.1 | B9N51_01040 | 153998     | 154213   | 1      | translation initiation factor IF-1                                                     |
| 143045       | 188929     | 45884  | OXZ29617.1 | B9N51_01045 | 154228     | 154341   | 1      | 50S ribosomal protein L36                                                              |
| 143045       | 188929     | 45884  | OXZ29618.1 | B9N51_01050 | 154354     | 154704   | 1      | 30S ribosomal protein S13                                                              |
| 143045       | 188929     | 45884  | OXZ29619.1 | B9N51_01055 | 154720     | 155127   | 1      | 30S ribosomal protein S11                                                              |
| 143045       | 188929     | 45884  | OXZ29620.1 | B9N51_01060 | 155183     | 156136   | 1      | DNA-directed RNA polymerase subunit alpha                                              |
| 143045       | 188929     | 45884  | OXZ29621.1 | B9N51_01065 | 156150     | 156545   | 1      | 50S ribosomal protein L17                                                              |
| 143045       | 188929     | 45884  | OXZ29622.1 | B9N51_01070 | 156909     | 158750   | 1      | hypothetical protein                                                                   |
| 143045       | 188929     | 45884  | OXZ29623.1 | B9N51_01075 | 159388     | 161361   | 1      | N-acetylmuramoyl-L-alanine amidase                                                     |
| 143045       | 188929     | 45884  | OXZ29624.1 | B9N51_01080 | 161458     | 162054   | 1      | 30S ribosomal protein S4                                                               |
| 143045       | 188929     | 45884  | OXZ29625.1 | B9N51_01085 | 162158     | 163393   | 1      | peptidoglycan-binding protein                                                          |
| 143045       | 188929     | 45884  | OXZ29524.1 | B9N51_01130 | 167644     | 171711   | 1      | hypothetical protein                                                                   |
| 143045       | 188929     | 45884  | OXZ29525.1 | B9N51_01135 | 171807     | 171895   | -1     | hypothetical protein                                                                   |
| 143045       | 188929     | 45884  | OXZ29516.1 | B9N51_01140 | 173176     | 182115   | 1      | hypothetical protein                                                                   |
| 143045       | 188929     | 45884  | OXZ29517.1 | B9N51_01145 | 182248     | 182928   | 1      | hypothetical protein                                                                   |
| 143045       | 188929     | 45884  | OXZ29518.1 | B9N51_01150 | 183357     | 185522   | 1      | hypothetical protein                                                                   |
| 143045       | 188929     | 45884  | OXZ29519.1 | B9N51_01155 | 185644     | 187059   | 1      | cell wall anchor protein                                                               |
| 143045       | 188929     | 45884  | OXZ29520.1 | B9N51_01160 | 187237     | 188103   | 1      | class C sortase                                                                        |
| 143045       | 188929     | 45884  | OXZ29521.1 | B9N51_01165 | 188090     | 188929   | 1      | class C sortase                                                                        |
| 143045       | 188929     | 45884  | OXZ29522.1 | B9N51_01170 | 188916     | 189767   | 1      | class C sortase                                                                        |
| 210413       | 218373     | 7960   | OXZ29323.1 | B9N51_01710 | 210413     | 210874   | 1      | CtsR family transcriptional regulator                                                  |
| 210413       | 218373     | 7960   | OXZ29324.1 | B9N51_01715 | 210885     | 211484   | 1      | hypothetical protein                                                                   |
| 210413       | 218373     | 7960   | OXZ29325.1 | B9N51_01720 | 211477     | 212472   | 1      | ATP--guanido phosphotransferase<br>ATP-dependent Clp protease ATP-binding              |
| 210413       | 218373     | 7960   | OXZ29326.1 | B9N51_01725 | 212469     | 214889   | 1      | protein ClpC                                                                           |
| 210413       | 218373     | 7960   | OXZ29327.1 | B9N51_01730 | 214891     | 216252   | 1      | DNA repair protein RadA                                                                |
| 210413       | 218373     | 7960   | OXZ29328.1 | B9N51_01735 | 216281     | 216586   | -1     | hypothetical protein                                                                   |
| 210413       | 218373     | 7960   | OXZ29329.1 | B9N51_01740 | 216688     | 218373   | -1     | M3 family oligoendopeptidase                                                           |
| 598893       | 604825     | 5932   | OXZ28763.1 | B9N51_03760 | 598893     | 599084   | 1      | 50S ribosomal protein L35                                                              |
| 598893       | 604825     | 5932   | OXZ28764.1 | B9N51_03765 | 599103     | 599456   | 1      | 50S ribosomal protein L20                                                              |
| 598893       | 604825     | 5932   | OXZ28765.1 | B9N51_03770 | 599488     | 599763   | -1     | hypothetical protein                                                                   |
| 598893       | 604825     | 5932   | OXZ28766.1 | B9N51_03775 | 599763     | 600380   | -1     | recombinase RecX                                                                       |
| 598893       | 604825     | 5932   | OXZ28767.1 | B9N51_03780 | 600569     | 600808   | 1      | hypothetical protein                                                                   |
| 598893       | 604825     | 5932   | OXZ28768.1 | B9N51_03785 | 600817     | 601893   | 1      | phosphoesterase                                                                        |
| 598893       | 604825     | 5932   | OXZ28769.1 | B9N51_03790 | 601890     | 604142   | 1      | DNA repair protein Rad50                                                               |
| 598893       | 604825     | 5932   | OXZ28770.1 | B9N51_03795 | 604145     | 604825   | 1      | serine/threonine protein phosphatase                                                   |
| 614359       | 676348     | 61989  | OXZ28780.1 | B9N51_03845 | 614359     | 615057   | 1      | DNA-binding response regulator                                                         |
| 614359       | 676348     | 61989  | OXZ28781.1 | B9N51_03850 | 615099     | 615683   | 1      | peptidylprolyl isomerase                                                               |
| 614359       | 676348     | 61989  | OXZ28782.1 | B9N51_03855 | 615685     | 616296   | 1      | thymidine kinase                                                                       |
| 614359       | 676348     | 61989  | OXZ28783.1 | B9N51_03860 | 616339     | 616809   | -1     | S-ribosylhomocysteine lyase                                                            |
| 614359       | 676348     | 61989  | OXZ28784.1 | B9N51_03865 | 616818     | 617921   | -1     | rod shape-determining protein RodA                                                     |
| 614359       | 676348     | 61989  | OXZ28785.1 | B9N51_03870 | 618006     | 618839   | 1      | endonuclease IV                                                                        |
| 614359       | 676348     | 61989  | OXZ28786.1 | B9N51_03875 | 618820     | 619446   | 1      | endonuclease III                                                                       |
| 614359       | 676348     | 61989  | OXZ28787.1 | B9N51_03880 | 619515     | 620435   | 1      | aspartate carbamoyltransferase<br>aspartate carbamoyltransferase regulatory            |
| 614359       | 676348     | 61989  | OXZ28788.1 | B9N51_03885 | 620435     | 620863   | 1      | subunit                                                                                |
| 614359       | 676348     | 61989  | OXZ28789.1 | B9N51_03890 | 620863     | 622059   | 1      | dihydroorotase                                                                         |
| 614359       | 676348     | 61989  | OXZ28790.1 | B9N51_03895 | 622046     | 622897   | 1      | orotidine-5'-phosphate decarboxylase<br>dihydroorotate dehydrogenase electron transfer |
| 614359       | 676348     | 61989  | OXZ28791.1 | B9N51_03900 | 622890     | 623606   | 1      | subunit                                                                                |

|         |         |                  |             |         |         |                                                                                             |
|---------|---------|------------------|-------------|---------|---------|---------------------------------------------------------------------------------------------|
| 614359  | 676348  | 61989 OXZ28792.1 | B9N51_03905 | 623599  | 624495  | dihydroorotate dehydrogenase B catalytic<br>1 subunit                                       |
| 614359  | 676348  | 61989 OXZ28793.1 | B9N51_03910 | 624506  | 625078  | 1 orotate phosphoribosyltransferase                                                         |
| 614359  | 676348  | 61989 OXZ28794.1 | B9N51_03915 | 625207  | 625911  | 1 isoprenyl transferase                                                                     |
| 614359  | 676348  | 61989 OXZ28795.1 | B9N51_03920 | 625908  | 626687  | 1 phosphatidate cytidyltransferase                                                          |
| 614359  | 676348  | 61989 OXZ28796.1 | B9N51_03925 | 626700  | 627704  | 1 RIP metalloprotease RseP<br>4-hydroxy-3-methylbut-2-en-1-yl diphosphate                   |
| 614359  | 676348  | 61989 OXZ28797.1 | B9N51_03930 | 627755  | 628804  | 1 synthase                                                                                  |
| 614359  | 676348  | 61989 OXZ28798.1 | B9N51_03935 | 628805  | 633070  | 1 PolC-type DNA polymerase III                                                              |
| 614359  | 676348  | 61989 OXZ28799.1 | B9N51_03940 | 633103  | 634086  | 1 phosphate starvation-inducible protein PhoH                                               |
| 614359  | 676348  | 61989 OXZ28800.1 | B9N51_03945 | 634067  | 634528  | 1 rRNA maturation RNase YbeY                                                                |
| 614359  | 676348  | 61989 OXZ28801.1 | B9N51_03950 | 634512  | 635255  | 1 diacylglycerol kinase                                                                     |
| 614359  | 676348  | 61989 OXZ28802.1 | B9N51_03955 | 635263  | 635658  | 1 cytidine deaminase                                                                        |
| 614359  | 676348  | 61989 OXZ28803.1 | B9N51_03960 | 635651  | 636535  | 1 GTPase Era                                                                                |
| 614359  | 676348  | 61989 OXZ28804.1 | B9N51_03965 | 636535  | 637239  | 1 DNA repair protein RecO                                                                   |
| 614359  | 676348  | 61989 OXZ28805.1 | B9N51_03970 | 637249  | 638937  | 1 hypothetical protein                                                                      |
| 614359  | 676348  | 61989 OXZ28806.1 | B9N51_03975 | 638948  | 639739  | 1 hypothetical protein                                                                      |
| 614359  | 676348  | 61989 OXZ28807.1 | B9N51_03980 | 639829  | 641271  | 1 serine/threonine protein kinase                                                           |
| 614359  | 676348  | 61989 OXZ28808.1 | B9N51_03985 | 641273  | 641947  | 1 protein phosphatase<br>tRNA (N6-isopentenyl adenosine(37)-C2)-                            |
| 614359  | 676348  | 61989 OXZ28809.1 | B9N51_03990 | 642004  | 643389  | 1 methylthiotransferase MiaB                                                                |
| 614359  | 676348  | 61989 OXZ28810.1 | B9N51_03995 | 643391  | 645970  | 1 DNA mismatch repair protein MutS                                                          |
| 614359  | 676348  | 61989 OXZ28811.1 | B9N51_04000 | 645963  | 647846  | 1 DNA mismatch repair protein MutL<br>tRNA (adenosine(37)-N6)-                              |
| 614359  | 676348  | 61989 OXZ28812.1 | B9N51_04005 | 647843  | 648787  | 1 dimethylallyltransferase MiaA                                                             |
| 614359  | 676348  | 61989 OXZ28813.1 | B9N51_04010 | 648774  | 650048  | 1 hypothetical protein                                                                      |
| 614359  | 676348  | 61989 OXZ28814.1 | B9N51_04015 | 650099  | 650725  | -1 LexA repressor                                                                           |
| 614359  | 676348  | 61989 OXZ28815.1 | B9N51_04020 | 650900  | 651211  | 1 peptidoglycan-binding protein LysM                                                        |
| 614359  | 676348  | 61989 OXZ28816.1 | B9N51_04025 | 651291  | 652271  | -1 recombinase XerC                                                                         |
| 614359  | 676348  | 61989            | B9N51_04030 | 652377  | 653553  | -1 aspartate aminotransferase                                                               |
| 614359  | 676348  | 61989 OXZ28817.1 | B9N51_04035 | 653540  | 654361  | -1 metal-dependent phosphoesterase                                                          |
| 614359  | 676348  | 61989 OXZ28818.1 | B9N51_04040 | 654430  | 655971  | -1 ribonuclease Y                                                                           |
| 614359  | 676348  | 61989 OXZ28819.1 | B9N51_04045 | 656090  | 656752  | -1 chromosome partitioning protein ParA                                                     |
| 614359  | 676348  | 61989 OXZ28820.1 | B9N51_04050 | 656739  | 656978  | -1 hypothetical protein                                                                     |
| 614359  | 676348  | 61989 OXZ28821.1 | B9N51_04055 | 656978  | 658561  | -1 exonuclease SbcC                                                                         |
| 614359  | 676348  | 61989 OXZ28822.1 | B9N51_04060 | 658561  | 659511  | -1 phosphoesterase                                                                          |
| 614359  | 676348  | 61989 OXZ28822.1 | B9N51_04065 | 659542  | 660633  | -1 recombinase RecA<br>CDP-diacylglycerol--glycerol-3-phosphate 3-                          |
| 614359  | 676348  | 61989 OXZ28823.1 | B9N51_04070 | 660702  | 661238  | -1 phosphatidyltransferase                                                                  |
| 614359  | 676348  | 61989 OXZ28824.1 | B9N51_04075 | 661240  | 663465  | -1 cell division protein FtsK<br>deoxyuridine 5'-triphosphate                               |
| 614359  | 676348  | 61989 OXZ28825.1 | B9N51_04080 | 663468  | 663899  | -1 nucleotidohydrolase                                                                      |
| 614359  | 676348  | 61989 OXZ28826.1 | B9N51_04085 | 663951  | 666095  | -1 polyribonucleotide nucleotidyltransferase                                                |
| 614359  | 676348  | 61989 OXZ28827.1 | B9N51_04090 | 666142  | 666408  | -1 30S ribosomal protein S15                                                                |
| 614359  | 676348  | 61989 OXZ28828.1 | B9N51_04095 | 666489  | 667415  | -1 riboflavin biosynthesis protein RibF                                                     |
| 614359  | 676348  | 61989 OXZ28829.1 | B9N51_04100 | 667406  | 668269  | -1 tRNA pseudouridine(55) synthase TruB                                                     |
| 614359  | 676348  | 61989 OXZ28830.1 | B9N51_04105 | 668253  | 669221  | -1 exopolyphosphatase                                                                       |
| 614359  | 676348  | 61989 OXZ28831.1 | B9N51_04110 | 669211  | 669576  | -1 ribosome-binding factor A                                                                |
| 614359  | 676348  | 61989 OXZ28832.1 | B9N51_04115 | 669584  | 671884  | -1 translation initiation factor IF-2                                                       |
| 614359  | 676348  | 61989 OXZ28833.1 | B9N51_04120 | 671903  | 672166  | -1 RNA-binding protein<br>transcription termination/antitermination protein                 |
| 614359  | 676348  | 61989 OXZ28834.1 | B9N51_04125 | 672192  | 673466  | -1 NusA                                                                                     |
| 614359  | 676348  | 61989 OXZ28835.1 | B9N51_04130 | 673476  | 673940  | -1 ribosome maturation factor                                                               |
| 614359  | 676348  | 61989 OXZ28836.1 | B9N51_04135 | 674047  | 674460  | -1 hypothetical protein                                                                     |
| 614359  | 676348  | 61989 OXZ28837.1 | B9N51_04140 | 674460  | 675443  | -1 hypothetical protein                                                                     |
| 614359  | 676348  | 61989 OXZ28838.1 | B9N51_04145 | 675445  | 676062  | -1 nodulation efficiency protein D                                                          |
| 614359  | 676348  | 61989 OXZ28839.1 | B9N51_04150 | 676169  | 676348  | -1 30S ribosomal protein S21                                                                |
| 858783  | 869107  | 10324 OXZ28383.1 | B9N51_04985 | 858783  | 860063  | 1 hypothetical protein                                                                      |
| 858783  | 869107  | 10324 OXZ28384.1 | B9N51_04990 | 860056  | 860400  | 1 hypothetical protein                                                                      |
| 858783  | 869107  | 10324 OXZ28250.1 | B9N51_04995 | 861555  | 861643  | 1 hypothetical protein                                                                      |
| 858783  | 869107  | 10324 OXZ28251.1 | B9N51_05000 | 861771  | 862706  | -1 sugar ABC transporter permease                                                           |
| 858783  | 869107  | 10324 OXZ28252.1 | B9N51_05005 | 862706  | 863806  | -1 ABC transporter permease                                                                 |
| 858783  | 869107  | 10324 OXZ28253.1 | B9N51_05010 | 863796  | 865328  | -1 heme ABC transporter ATP-binding protein<br>BMP family ABC transporter substrate-binding |
| 858783  | 869107  | 10324 OXZ28254.1 | B9N51_05015 | 865394  | 866470  | -1 protein                                                                                  |
| 858783  | 869107  | 10324 OXZ28255.1 | B9N51_05020 | 866710  | 867735  | 1 NADH dehydrogenase subunit                                                                |
| 858783  | 869107  | 10324 OXZ28256.1 | B9N51_05025 | 867758  | 869107  | -1 uracil permease                                                                          |
| 1340012 | 1346417 | 6405 OXZ27371.1  | B9N51_07210 | 1340012 | 1340278 | -1 hypothetical protein                                                                     |
| 1340012 | 1346417 | 6405 OXZ27372.1  | B9N51_07215 | 1340262 | 1340555 | -1 hypothetical protein                                                                     |
| 1340012 | 1346417 | 6405 OXZ27373.1  | B9N51_07220 | 1340686 | 1341210 | 1 DNA topology modulation protein FlaR                                                      |
| 1340012 | 1346417 | 6405             | B9N51_07225 | 1341893 | 1343837 | -1 cell wall protein                                                                        |
| 1340012 | 1346417 | 6405 OXZ27374.1  | B9N51_07230 | 1344543 | 1344977 | -1 GNAT family N-acetyltransferase                                                          |
| 1340012 | 1346417 | 6405 OXZ27375.1  | B9N51_07235 | 1345000 | 1345698 | -1 hypothetical protein                                                                     |
| 1340012 | 1346417 | 6405 OXZ27376.1  | B9N51_07240 | 1345698 | 1346417 | -1 peptidase S51                                                                            |
| 1378722 | 1422726 | 44004 OXZ29512.1 | B9N51_01610 | 1378722 | 1379030 | -1 exosortase                                                                               |
| 1378722 | 1422726 | 44004 OXZ29511.1 | B9N51_01605 | 1379036 | 1379707 | -1 ATPase                                                                                   |
| 1378722 | 1422726 | 44004 OXZ29510.1 | B9N51_01600 | 1379912 | 1381450 | -1 hypothetical protein                                                                     |
| 1378722 | 1422726 | 44004 OXZ29509.1 | B9N51_01595 | 1381626 | 1383134 | -1 AAA family ATPase                                                                        |
| 1378722 | 1422726 | 44004 OXZ29508.1 | B9N51_01590 | 1383877 | 1384767 | -1 methionine sulfoxide reductase                                                           |
| 1378722 | 1422726 | 44004 OXZ29507.1 | B9N51_01585 | 1385002 | 1386354 | -1 hemolysin                                                                                |
| 1378722 | 1422726 | 44004            | B9N51_01580 | 1386767 | 1387560 | -1 lysophospholipase                                                                        |
| 1378722 | 1422726 | 44004 OXZ29506.1 | B9N51_01575 | 1387770 | 1390295 | -1 hypothetical protein                                                                     |
| 1378722 | 1422726 | 44004            | B9N51_01570 | 1390527 | 1390706 | -1 hypothetical protein                                                                     |
| 1378722 | 1422726 | 44004            | B9N51_01565 | 1390676 | 1390825 | -1 protein-S-isoprenylcysteine methyltransferase                                            |
| 1378722 | 1422726 | 44004 OXZ29505.1 | B9N51_01560 | 1390839 | 1391777 | -1 esterase                                                                                 |
| 1378722 | 1422726 | 44004 OXZ29504.1 | B9N51_01555 | 1391846 | 1392472 | -1 hypothetical protein                                                                     |
| 1378722 | 1422726 | 44004 OXZ29503.1 | B9N51_01550 | 1392500 | 1393108 | -1 SAM-dependent methyltransferase                                                          |

|         |         |                  |             |         |         |                                                  |
|---------|---------|------------------|-------------|---------|---------|--------------------------------------------------|
| 1378722 | 1422726 | 44004 OXZ29502.1 | B9N51_01545 | 1393324 | 1394073 | -1 phosphorylase                                 |
| 1378722 | 1422726 | 44004 OXZ29501.1 | B9N51_01540 | 1394196 | 1395803 | -1 macrolide ABC transporter ATP-binding protein |
| 1378722 | 1422726 | 44004 OXZ29500.1 | B9N51_01535 | 1396207 | 1396821 | -1 hypothetical protein                          |
| 1378722 | 1422726 | 44004 OXZ29499.1 | B9N51_01530 | 1397160 | 1398557 | -1 ABC transporter ATP-binding protein           |
| 1378722 | 1422726 | 44004 OXZ29498.1 | B9N51_01525 | 1398550 | 1399266 | -1 cobalt transporter                            |
| 1378722 | 1422726 | 44004 OXZ29497.1 | B9N51_01520 | 1399263 | 1399862 | -1 hypothetical protein                          |
| 1378722 | 1422726 | 44004 OXZ29496.1 | B9N51_01515 | 1399872 | 1401593 | -1 ABC transporter ATP-binding protein           |
| 1378722 | 1422726 | 44004 OXZ29495.1 | B9N51_01510 | 1401577 | 1403331 | -1 ABC transporter ATP-binding protein           |
| 1378722 | 1422726 | 44004 OXZ29494.1 | B9N51_01505 | 1403492 | 1404484 | 1 AraC family transcriptional regulator          |
| 1378722 | 1422726 | 44004 OXZ29493.1 | B9N51_01500 | 1404669 | 1405148 | -1 mercury transporter                           |
| 1378722 | 1422726 | 44004 OXZ29492.1 | B9N51_01495 | 1405547 | 1405960 | -1 hypothetical protein                          |
| 1378722 | 1422726 | 44004 OXZ29491.1 | B9N51_01490 | 1406031 | 1406336 | -1 hypothetical protein                          |
| 1378722 | 1422726 | 44004            | B9N51_01485 | 1406504 | 1406635 | -1 adenine methylase                             |
| 1378722 | 1422726 | 44004 OXZ29514.1 | B9N51_01480 | 1406849 | 1407139 | -1 RNA methyltransferase                         |
| 1378722 | 1422726 | 44004 OXZ29490.1 | B9N51_01475 | 1407153 | 1408907 | -1 recombinase family protein                    |
| 1378722 | 1422726 | 44004 OXZ29489.1 | B9N51_01470 | 1409399 | 1410751 | -1 MATE family efflux transporter                |
| 1378722 | 1422726 | 44004 OXZ29488.1 | B9N51_01465 | 1410773 | 1412518 | -1 ABC transporter ATP-binding protein           |
| 1378722 | 1422726 | 44004 OXZ29487.1 | B9N51_01460 | 1412519 | 1414231 | -1 ABC transporter ATP-binding protein           |
| 1378722 | 1422726 | 44004 OXZ29486.1 | B9N51_01455 | 1414247 | 1415755 | -1 ABC transporter ATP-binding protein           |
| 1378722 | 1422726 | 44004 OXZ29485.1 | B9N51_01450 | 1415743 | 1416417 | -1 hypothetical protein                          |
| 1378722 | 1422726 | 44004 OXZ29484.1 | B9N51_01445 | 1416435 | 1417037 | -1 hypothetical protein                          |
| 1378722 | 1422726 | 44004 OXZ29483.1 | B9N51_01440 | 1417179 | 1418150 | -1 AraC family transcriptional regulator         |
| 1378722 | 1422726 | 44004 OXZ29482.1 | B9N51_01435 | 1418470 | 1419747 | -1 IS110 family transposase                      |
| 1378722 | 1422726 | 44004 OXZ29481.1 | B9N51_01430 | 1420159 | 1420500 | 1 plasmid mobilization relaxosome protein MobC   |
| 1378722 | 1422726 | 44004 OXZ29480.1 | B9N51_01425 | 1420822 | 1422726 | -1 DNA helicase UvrD                             |
| 1378722 | 1422726 | 44004 OXZ29479.1 | B9N51_01420 | 1422714 | 1424804 | -1 ATP-dependent endonuclease                    |
| 1393324 | 1399862 | 6538 OXZ29502.1  | B9N51_01545 | 1393324 | 1394073 | -1 phosphorylase                                 |
| 1393324 | 1399862 | 6538 OXZ29501.1  | B9N51_01540 | 1394196 | 1395803 | -1 macrolide ABC transporter ATP-binding protein |
| 1393324 | 1399862 | 6538 OXZ29500.1  | B9N51_01535 | 1396207 | 1396821 | -1 hypothetical protein                          |
| 1393324 | 1399862 | 6538 OXZ29499.1  | B9N51_01530 | 1397160 | 1398557 | -1 ABC transporter ATP-binding protein           |
| 1393324 | 1399862 | 6538 OXZ29498.1  | B9N51_01525 | 1398550 | 1399266 | -1 cobalt transporter                            |
| 1393324 | 1399862 | 6538 OXZ29497.1  | B9N51_01520 | 1399263 | 1399862 | -1 hypothetical protein                          |
| 1405547 | 1418150 | 12603 OXZ29492.1 | B9N51_01495 | 1405547 | 1405960 | -1 hypothetical protein                          |
| 1405547 | 1418150 | 12603 OXZ29491.1 | B9N51_01490 | 1406031 | 1406336 | -1 hypothetical protein                          |
| 1405547 | 1418150 | 12603            | B9N51_01485 | 1406504 | 1406635 | -1 adenine methylase                             |
| 1405547 | 1418150 | 12603 OXZ29514.1 | B9N51_01480 | 1406849 | 1407139 | -1 RNA methyltransferase                         |
| 1405547 | 1418150 | 12603 OXZ29490.1 | B9N51_01475 | 1407153 | 1408907 | -1 recombinase family protein                    |
| 1405547 | 1418150 | 12603 OXZ29489.1 | B9N51_01470 | 1409399 | 1410751 | -1 MATE family efflux transporter                |
| 1405547 | 1418150 | 12603 OXZ29488.1 | B9N51_01465 | 1410773 | 1412518 | -1 ABC transporter ATP-binding protein           |
| 1405547 | 1418150 | 12603 OXZ29487.1 | B9N51_01460 | 1412519 | 1414231 | -1 ABC transporter ATP-binding protein           |
| 1405547 | 1418150 | 12603 OXZ29486.1 | B9N51_01455 | 1414247 | 1415755 | -1 ABC transporter ATP-binding protein           |
| 1405547 | 1418150 | 12603 OXZ29485.1 | B9N51_01450 | 1415743 | 1416417 | -1 hypothetical protein                          |
| 1405547 | 1418150 | 12603 OXZ29484.1 | B9N51_01445 | 1416435 | 1417037 | -1 hypothetical protein                          |
| 1405547 | 1418150 | 12603 OXZ29483.1 | B9N51_01440 | 1417179 | 1418150 | -1 AraC family transcriptional regulator         |
| 1420159 | 1426302 | 6143 OXZ29481.1  | B9N51_01430 | 1420159 | 1420500 | 1 plasmid mobilization relaxosome protein MobC   |
| 1420159 | 1426302 | 6143 OXZ29480.1  | B9N51_01425 | 1420822 | 1422726 | -1 DNA helicase UvrD                             |
| 1420159 | 1426302 | 6143 OXZ29479.1  | B9N51_01420 | 1422714 | 1424804 | -1 ATP-dependent endonuclease                    |
| 1420159 | 1426302 | 6143 OXZ29478.1  | B9N51_01415 | 1424882 | 1425718 | -1 abortive phage infection protein              |
| 1420159 | 1426302 | 6143 OXZ29477.1  | B9N51_01410 | 1425715 | 1426302 | -1 transcriptional regulator                     |
| 1469754 | 1474021 | 4267 OXZ29513.1  | B9N51_01200 | 1469754 | 1470101 | 1 toxin MazF                                     |
| 1469754 | 1474021 | 4267 OXZ29435.1  | B9N51_01195 | 1470680 | 1471255 | -1 cell filamentation protein Fic                |
| 1469754 | 1474021 | 4267 OXZ29434.1  | B9N51_01190 | 1471990 | 1472724 | -1 hydrolase                                     |
| 1469754 | 1474021 | 4267 OXZ29433.1  | B9N51_01185 | 1472724 | 1473227 | -1 acetyltransferase                             |
| 1469754 | 1474021 | 4267 OXZ29432.1  | B9N51_01180 | 1473380 | 1474021 | 1 hemolysin III                                  |
| 1526090 | 1536080 | 9990 OXZ27316.1  | B9N51_07615 | 1524271 | 1526106 | -1 multidrug ABC transporter                     |
| 1526090 | 1536080 | 9990 OXZ27317.1  | B9N51_07620 | 1526090 | 1527892 | -1 multidrug ABC transporter                     |
| 1526090 | 1536080 | 9990 OXZ27318.1  | B9N51_07625 | 1527972 | 1528637 | -1 histidine kinase                              |
| 1526090 | 1536080 | 9990 OXZ27319.1  | B9N51_07630 | 1528645 | 1529340 | -1 DNA-binding response regulator                |
| 1526090 | 1536080 | 9990 OXZ27320.1  | B9N51_07635 | 1529422 | 1530285 | -1 UTP--glucose-1-phosphate uridylyltransferase  |
| 1526090 | 1536080 | 9990 OXZ27321.1  | B9N51_07640 | 1531007 | 1533592 | -1 ATP-dependent chaperone ClpB                  |
| 1526090 | 1536080 | 9990 OXZ27322.1  | B9N51_07645 | 1533611 | 1534555 | -1 heat-shock protein                            |
| 1526090 | 1536080 | 9990 OXZ27347.1  | B9N51_07650 | 1534724 | 1535368 | -1 nitroreductase                                |
| 1526090 | 1536080 | 9990 OXZ27323.1  | B9N51_07655 | 1535541 | 1536080 | -1 RNA polymerase subunit sigma                  |
| 1677255 | 1704148 | 26893 OXZ29725.1 | B9N51_00210 | 1677255 | 1677599 | 1 anti-sigma factor                              |
| 1677255 | 1704148 | 26893 OXZ29726.1 | B9N51_00215 | 1677604 | 1678380 | 1 B/F/G family RNA polymerase sigma-70 factor    |
| 1677255 | 1704148 | 26893 OXZ29727.1 | B9N51_00220 | 1678381 | 1678992 | 1 glutamine ABC transporter ATP-binding protein  |
| 1677255 | 1704148 | 26893 OXZ29728.1 | B9N51_00225 | 1678994 | 1679767 | 1 amino acid ABC transporter permease            |
| 1677255 | 1704148 | 26893 OXZ29729.1 | B9N51_00230 | 1679781 | 1681139 | 1 fumarate hydratase, class II                   |
| 1677255 | 1704148 | 26893 OXZ29738.1 | B9N51_00235 | 1681262 | 1681438 | 1 transaldolase                                  |
| 1677255 | 1704148 | 26893 OXZ29730.1 | B9N51_00240 | 1682099 | 1682743 | -1 hypothetical protein                          |
| 1677255 | 1704148 | 26893 OXZ29731.1 | B9N51_00245 | 1682740 | 1683399 | -1 ABC transporter                               |
| 1677255 | 1704148 | 26893 OXZ29732.1 | B9N51_00250 | 1683562 | 1683996 | -1 hypothetical protein                          |
| 1677255 | 1704148 | 26893 OXZ29733.1 | B9N51_00255 | 1684006 | 1684404 | -1 hypothetical protein                          |
| 1677255 | 1704148 | 26893 OXZ29734.1 | B9N51_00260 | 1684512 | 1684697 | -1 hypothetical protein                          |
| 1677255 | 1704148 | 26893 OXZ29735.1 | B9N51_00265 | 1684709 | 1684927 | 1 hypothetical protein                           |
| 1677255 | 1704148 | 26893 OXZ29736.1 | B9N51_00270 | 1684937 | 1685083 | 1 YvrJ family protein                            |
| 1677255 | 1704148 | 26893 OXZ27007.1 | B9N51_08160 | 1686267 | 1687624 | -1 hypothetical protein                          |
| 1677255 | 1704148 | 26893 OXZ27023.1 | B9N51_08145 | 1688904 | 1690073 | 1 IS110 family transposase                       |
| 1677255 | 1704148 | 26893 OXZ27032.1 | B9N51_08100 | 1691294 | 1691947 | -1 hypothetical protein                          |
| 1677255 | 1704148 | 26893 OXZ27033.1 | B9N51_08105 | 1692112 | 1692678 | -1 transposase                                   |
| 1677255 | 1704148 | 26893 OXZ27008.1 | B9N51_08150 | 1695626 | 1696225 | -1 hypothetical protein                          |
| 1677255 | 1704148 | 26893 OXZ27009.1 | B9N51_08155 | 1696272 | 1696791 | -1 hypothetical protein                          |
| 1677255 | 1704148 | 26893            | B9N51_08110 | 1697926 | 1702752 | -1 hypothetical protein                          |



|         |         |                  |             |         |         |                                                  |
|---------|---------|------------------|-------------|---------|---------|--------------------------------------------------|
| 1677255 | 1704148 | 26893            | B9N51_08115 | 1703206 | 1703397 | -1 transcriptional regulator                     |
| 1677255 | 1704148 | 26893 OXZ27030.1 | B9N51_08120 | 1703504 | 1704148 | -1 hypothetical protein                          |
| 1684937 | 1696791 | 11854 OXZ29736.1 | B9N51_00270 | 1684937 | 1685083 | 1 YvrJ family protein                            |
| 1684937 | 1696791 | 11854 OXZ27007.1 | B9N51_08160 | 1686267 | 1687624 | -1 hypothetical protein                          |
| 1684937 | 1696791 | 11854 OXZ27023.1 | B9N51_08145 | 1688904 | 1690073 | 1 IS110 family transposase                       |
| 1684937 | 1696791 | 11854 OXZ27032.1 | B9N51_08100 | 1691294 | 1691947 | -1 hypothetical protein                          |
| 1684937 | 1696791 | 11854 OXZ27033.1 | B9N51_08105 | 1692112 | 1692678 | -1 transposase                                   |
| 1684937 | 1696791 | 11854 OXZ27008.1 | B9N51_08150 | 1695626 | 1696225 | -1 hypothetical protein                          |
| 1684937 | 1696791 | 11854 OXZ27009.1 | B9N51_08155 | 1696272 | 1696791 | -1 hypothetical protein                          |
| 1703206 | 1716235 | 13029            | B9N51_08115 | 1703206 | 1703397 | -1 transcriptional regulator                     |
| 1703206 | 1716235 | 13029 OXZ27030.1 | B9N51_08120 | 1703504 | 1704148 | -1 hypothetical protein                          |
| 1703206 | 1716235 | 13029 OXZ27031.1 | B9N51_08125 | 1704290 | 1704423 | -1 hypothetical protein                          |
| 1703206 | 1716235 | 13029 OXZ27029.1 | B9N51_08140 | 1711588 | 1712868 | 1 group II intron reverse transcriptase/maturase |
| 1703206 | 1716235 | 13029 OXZ26940.1 | B9N51_08200 | 1715865 | 1716235 | -1 IS200/IS605 family transposase                |

**Table S3J: Predicted genomic islands in the genome of "F. nericia" T160124**

Shown are genes of genomic islands predicted by IslandViewer4

| Island start | Island end | Length | Gene name  | Locus       | Gene start | Gene end | Strand | Product                                                                                                          |
|--------------|------------|--------|------------|-------------|------------|----------|--------|------------------------------------------------------------------------------------------------------------------|
| 507          | 18470      | 17963  | OXZ26312.1 | B9N52_00015 | 507        | 1049     | 1      | LemA family protein                                                                                              |
| 507          | 18470      | 17963  | OXZ26313.1 | B9N52_00020 | 1173       | 2081     | 1      | coproporphyrinogen III oxidase                                                                                   |
| 507          | 18470      | 17963  | OXZ26314.1 | B9N52_00025 | 2081       | 2809     | 1      | biotin--[acetyl-CoA-carboxylase] ligase                                                                          |
| 507          | 18470      | 17963  | OXZ26315.1 | B9N52_00030 | 2822       | 3049     | -1     | hypothetical protein                                                                                             |
| 507          | 18470      | 17963  | OXZ26316.1 | B9N52_00035 | 3142       | 3543     | 1      | transcriptional regulator                                                                                        |
| 507          | 18470      | 17963  | OXZ26317.1 | B9N52_00040 | 3588       | 3803     | 1      | heavy metal transporter                                                                                          |
| 507          | 18470      | 17963  | OXZ26318.1 | B9N52_00045 | 3803       | 5614     | 1      | cadmium-translocating P-type ATPase                                                                              |
| 507          | 18470      | 17963  | OXZ26319.1 | B9N52_00050 | 5661       | 5972     | 1      | hypothetical protein                                                                                             |
| 507          | 18470      | 17963  | OXZ26320.1 | B9N52_00055 | 6054       | 6332     | 1      | damage-inducible protein J                                                                                       |
| 507          | 18470      | 17963  | OXZ26321.1 | B9N52_00060 | 6431       | 6688     | -1     | AbrB family transcriptional regulator                                                                            |
| 507          | 18470      | 17963  | OXZ26322.1 | B9N52_00065 | 6792       | 7367     | -1     | riboflavin transporter                                                                                           |
| 507          | 18470      | 17963  | OXZ26323.1 | B9N52_00070 | 7458       | 11297    | 1      | hypothetical protein                                                                                             |
| 507          | 18470      | 17963  | OXZ26324.1 | B9N52_00075 | 11319      | 11442    | 1      | transposase                                                                                                      |
| 507          | 18470      | 17963  | OXZ26274.1 | B9N52_00080 | 12592      | 13746    | -1     | 2-iminoacetate synthase ThiH                                                                                     |
| 507          | 18470      | 17963  | OXZ26275.1 | B9N52_00085 | 13754      | 14518    | -1     | thiazole synthase                                                                                                |
| 507          | 18470      | 17963  | OXZ26276.1 | B9N52_00090 | 14508      | 15104    | -1     | thiamine biosynthesis protein ThiF                                                                               |
| 507          | 18470      | 17963  | OXZ26277.1 | B9N52_00095 | 15106      | 15303    | -1     | thiamine biosynthesis protein ThiS                                                                               |
| 507          | 18470      | 17963  | OXZ26278.1 | B9N52_00100 | 15524      | 16135    | 1      | glutathione S-transferase                                                                                        |
| 507          | 18470      | 17963  | OXZ26279.1 | B9N52_00105 | 16232      | 16933    | 1      | SAM-dependent methyltransferase                                                                                  |
| 507          | 18470      | 17963  | OXZ26280.1 | B9N52_00110 | 16950      | 18470    | 1      | magnesium chelatase                                                                                              |
| 40249        | 48234      | 7985   | OXZ26299.1 | B9N52_00205 | 38280      | 40268    | 1      | exopolyphosphatase                                                                                               |
| 40249        | 48234      | 7985   | OXZ26300.1 | B9N52_00210 | 40249      | 40695    | 1      | 50S ribosomal protein L9                                                                                         |
| 40249        | 48234      | 7985   | OXZ26301.1 | B9N52_00215 | 40729      | 42066    | 1      | replicative DNA helicase                                                                                         |
| 40249        | 48234      | 7985   | OXZ26302.1 | B9N52_00220 | 42063      | 42626    | 1      | GNAT family N-acetyltransferase                                                                                  |
| 40249        | 48234      | 7985   | OXZ26303.1 | B9N52_00225 | 42631      | 43389    | 1      | DNA replication protein                                                                                          |
| 40249        | 48234      | 7985   | OXZ26304.1 | B9N52_00230 | 43392      | 44369    | 1      | DNA replication protein DnaC                                                                                     |
| 40249        | 48234      | 7985   | OXZ26305.1 | B9N52_00235 | 44366      | 45010    | 1      | NAD(P)H-hydrate epimerase                                                                                        |
| 40249        | 48234      | 7985   | OXZ26183.1 | B9N52_00240 | 46139      | 46226    | 1      | hypothetical protein                                                                                             |
| 40249        | 48234      | 7985   | OXZ26184.1 | B9N52_00245 | 46466      | 46645    | 1      | hypothetical protein                                                                                             |
| 40249        | 48234      | 7985   | OXZ26185.1 | B9N52_00250 | 47022      | 47564    | 1      | ECF transporter S component                                                                                      |
| 40249        | 48234      | 7985   | OXZ26186.1 | B9N52_00255 | 47548      | 48234    | 1      | radical SAM protein                                                                                              |
| 498315       | 512770     | 14455  | OXZ25905.1 | B9N52_02425 | 498315     | 498785   | 1      | 30S ribosomal protein S7                                                                                         |
| 498315       | 512770     | 14455  | OXZ25906.1 | B9N52_02430 | 498814     | 500901   | 1      | elongation factor G                                                                                              |
| 498315       | 512770     | 14455  | OXZ25907.1 | B9N52_02435 | 500913     | 502106   | 1      | elongation factor Tu                                                                                             |
| 498315       | 512770     | 14455  | OXZ25908.1 | B9N52_02440 | 502513     | 505694   | 1      | hypothetical protein                                                                                             |
| 498315       | 512770     | 14455  | OXZ25792.1 | B9N52_02445 | 506695     | 509981   | 1      | hypothetical protein                                                                                             |
| 498315       | 512770     | 14455  | OXZ25793.1 | B9N52_02450 | 510028     | 510627   | 1      | hypothetical protein                                                                                             |
| 498315       | 512770     | 14455  | OXZ25794.1 | B9N52_02455 | 511021     | 512190   | -1     | IS110 family transposase                                                                                         |
| 498315       | 512770     | 14455  | OXZ25795.1 | B9N52_02460 | 512477     | 512770   | 1      | hypothetical protein                                                                                             |
| 506695       | 512770     | 6075   | OXZ25792.1 | B9N52_02445 | 506695     | 509981   | 1      | hypothetical protein                                                                                             |
| 506695       | 512770     | 6075   | OXZ25793.1 | B9N52_02450 | 510028     | 510627   | 1      | hypothetical protein                                                                                             |
| 506695       | 512770     | 6075   | OXZ25794.1 | B9N52_02455 | 511021     | 512190   | -1     | IS110 family transposase                                                                                         |
| 506695       | 512770     | 6075   | OXZ25795.1 | B9N52_02460 | 512477     | 512770   | 1      | hypothetical protein                                                                                             |
| 717980       | 723912     | 5932   | OXZ25469.1 | B9N52_03640 | 717980     | 718171   | 1      | 50S ribosomal protein L35                                                                                        |
| 717980       | 723912     | 5932   | OXZ25470.1 | B9N52_03645 | 718190     | 718543   | 1      | 50S ribosomal protein L20                                                                                        |
| 717980       | 723912     | 5932   | OXZ25471.1 | B9N52_03650 | 718575     | 718850   | -1     | hypothetical protein                                                                                             |
| 717980       | 723912     | 5932   | OXZ25472.1 | B9N52_03655 | 718850     | 719467   | -1     | recombinase RecX                                                                                                 |
| 717980       | 723912     | 5932   | OXZ25473.1 | B9N52_03660 | 719656     | 719895   | 1      | hypothetical protein                                                                                             |
| 717980       | 723912     | 5932   | OXZ25474.1 | B9N52_03665 | 719904     | 720980   | 1      | phosphoesterase                                                                                                  |
| 717980       | 723912     | 5932   | OXZ25475.1 | B9N52_03670 | 720977     | 723229   | 1      | DNA repair protein Rad50                                                                                         |
| 717980       | 723912     | 5932   | OXZ25476.1 | B9N52_03675 | 723232     | 723912   | 1      | serine/threonine protein phosphatase                                                                             |
| 769989       | 780323     | 10334  | OXZ25521.1 | B9N52_03900 | 769989     | 770300   | 1      | peptidoglycan-binding protein LysM                                                                               |
| 769989       | 780323     | 10334  | OXZ25522.1 | B9N52_03905 | 770376     | 771356   | -1     | recombinase XerC                                                                                                 |
| 769989       | 780323     | 10334  |            | B9N52_03910 | 771463     | 772639   | -1     | aspartate aminotransferase                                                                                       |
| 769989       | 780323     | 10334  | OXZ25523.1 | B9N52_03915 | 772626     | 773447   | -1     | metal-dependent phosphoesterase                                                                                  |
| 769989       | 780323     | 10334  | OXZ25524.1 | B9N52_03920 | 773516     | 775057   | -1     | ribonuclease Y                                                                                                   |
| 769989       | 780323     | 10334  | OXZ25525.1 | B9N52_03925 | 775176     | 775838   | -1     | chromosome partitioning protein ParA                                                                             |
| 769989       | 780323     | 10334  | OXZ25526.1 | B9N52_03930 | 775825     | 776064   | -1     | hypothetical protein                                                                                             |
| 769989       | 780323     | 10334  | OXZ25527.1 | B9N52_03935 | 776064     | 777647   | -1     | exonuclease SbcC                                                                                                 |
| 769989       | 780323     | 10334  | OXZ25684.1 | B9N52_03940 | 777647     | 778597   | -1     | phosphoesterase                                                                                                  |
| 769989       | 780323     | 10334  | OXZ25528.1 | B9N52_03945 | 778628     | 779719   | -1     | recombinase RecA                                                                                                 |
| 769989       | 780323     | 10334  | OXZ25529.1 | B9N52_03950 | 779787     | 780323   | -1     | CDP-diacylglycerol--glycerol-3-phosphate 3-phosphatidyltransferase<br>tetracycline resistance determinant leader |
| 1182570      | 1194616    | 12046  | OXZ25283.1 | B9N52_05820 | 1182570    | 1182686  | -1     | peptide                                                                                                          |
| 1182570      | 1194616    | 12046  | OXZ25284.1 | B9N52_05825 | 1182931    | 1183866  | -1     | conjugal transfer protein                                                                                        |
| 1182570      | 1194616    | 12046  | OXZ25285.1 | B9N52_05830 | 1183863    | 1184864  | -1     | peptidase P60                                                                                                    |
| 1182570      | 1194616    | 12046  | OXZ25286.1 | B9N52_05835 | 1184861    | 1187038  | -1     | hypothetical protein                                                                                             |
| 1182570      | 1194616    | 12046  | OXZ25287.1 | B9N52_05840 | 1187041    | 1189488  | -1     | ATP/GTP-binding protein                                                                                          |
| 1182570      | 1194616    | 12046  | OXZ25288.1 | B9N52_05845 | 1189472    | 1189978  | -1     | conjugal transfer protein                                                                                        |
| 1182570      | 1194616    | 12046  | OXZ25289.1 | B9N52_05850 | 1189953    | 1190450  | -1     | antirestriction protein ArdA                                                                                     |
| 1182570      | 1194616    | 12046  | OXZ25290.1 | B9N52_05855 | 1190567    | 1190788  | -1     | hypothetical protein                                                                                             |
| 1182570      | 1194616    | 12046  | OXZ25291.1 | B9N52_05860 | 1190831    | 1192036  | -1     | replication initiation protein                                                                                   |
| 1182570      | 1194616    | 12046  | OXZ25292.1 | B9N52_05865 | 1192059    | 1192211  | -1     | conjugal transfer protein                                                                                        |
| 1182570      | 1194616    | 12046  | OXZ25293.1 | B9N52_05870 | 1192214    | 1193599  | -1     | ATP-binding protein                                                                                              |
| 1182570      | 1194616    | 12046  | OXZ25294.1 | B9N52_05875 | 1193628    | 1194014  | -1     | conjugal transfer protein                                                                                        |
| 1182570      | 1194616    | 12046  | OXZ25295.1 | B9N52_05880 | 1194030    | 1194344  | -1     | conjugal transfer protein                                                                                        |
| 1182570      | 1194616    | 12046  | OXZ25296.1 | B9N52_05885 | 1194529    | 1194616  | -1     | hypothetical protein                                                                                             |
| 1215800      | 1221814    | 6014   | OXZ25202.1 | B9N52_05970 | 1215800    | 1216666  | -1     | hypothetical protein                                                                                             |
| 1215800      | 1221814    | 6014   | OXZ25179.1 | B9N52_05975 | 1217667    | 1218396  | -1     | hypothetical protein                                                                                             |
| 1215800      | 1221814    | 6014   | OXZ25180.1 | B9N52_05980 | 1218662    | 1220110  | -1     | hypothetical protein                                                                                             |
| 1215800      | 1221814    | 6014   | OXZ25181.1 | B9N52_05985 | 1220372    | 1221814  | -1     | hypothetical protein                                                                                             |
| 1385415      | 1465266    | 79851  | OXZ25081.1 | B9N52_06785 | 1385415    | 1385762  | -1     | hypothetical protein                                                                                             |

|         |         |                  |             |         |         |                                                                                 |
|---------|---------|------------------|-------------|---------|---------|---------------------------------------------------------------------------------|
| 1385415 | 1465266 | 79851            | B9N52_06790 | 1385852 | 1386129 | -1 hypothetical protein                                                         |
| 1385415 | 1465266 | 79851 OXZ25076.1 | B9N52_06795 | 1386361 | 1386897 | -1 Rossman fold protein, TIGR00730 family                                       |
| 1385415 | 1465266 | 79851 OXZ25077.1 | B9N52_06800 | 1387008 | 1388005 | -1 macrolide ABC transporter ATP-binding protein                                |
| 1385415 | 1465266 | 79851 OXZ25019.1 | B9N52_06805 | 1389211 | 1389657 | -1 transposase                                                                  |
| 1385415 | 1465266 | 79851 OXZ25020.1 | B9N52_06810 | 1389736 | 1391862 | -1 catalase HP11                                                                |
| 1385415 | 1465266 | 79851 OXZ25021.1 | B9N52_06815 | 1392350 | 1392841 | -1 protein-S-isoprenylcysteine methyltransferase                                |
| 1385415 | 1465266 | 79851 OXZ25022.1 | B9N52_06820 | 1392855 | 1393793 | -1 esterase                                                                     |
| 1385415 | 1465266 | 79851 OXZ25023.1 | B9N52_06825 | 1393862 | 1394488 | -1 hypothetical protein                                                         |
| 1385415 | 1465266 | 79851 OXZ25024.1 | B9N52_06830 | 1394516 | 1395124 | -1 SAM-dependent methyltransferase                                              |
| 1385415 | 1465266 | 79851 OXZ25025.1 | B9N52_06835 | 1395340 | 1396089 | -1 phosphorylase                                                                |
| 1385415 | 1465266 | 79851 OXZ25026.1 | B9N52_06840 | 1396219 | 1396576 | -1 macrolide ABC transporter ATP-binding protein                                |
| 1385415 | 1465266 | 79851 OXZ25018.1 | B9N52_06845 | 1397577 | 1398145 | -1 macrolide ABC transporter ATP-binding protein                                |
| 1385415 | 1465266 | 79851 OXZ25017.1 | B9N52_06850 | 1399146 | 1399876 | -1 macrolide ABC transporter ATP-binding protein                                |
| 1385415 | 1465266 | 79851 OXZ24933.1 | B9N52_06855 | 1401405 | 1402019 | -1 hypothetical protein                                                         |
| 1385415 | 1465266 | 79851 OXZ24934.1 | B9N52_06860 | 1402226 | 1403590 | -1 ABC transporter ATP-binding protein                                          |
| 1385415 | 1465266 | 79851 OXZ24935.1 | B9N52_06865 | 1403578 | 1404273 | -1 cobalt ABC transporter permease                                              |
| 1385415 | 1465266 | 79851 OXZ24936.1 | B9N52_06870 | 1404273 | 1404854 | -1 hypothetical protein                                                         |
| 1385415 | 1465266 | 79851 OXZ24937.1 | B9N52_06875 | 1404914 | 1406257 | -1 MATE family efflux transporter                                               |
| 1385415 | 1465266 | 79851 OXZ24938.1 | B9N52_06880 | 1406269 | 1407990 | -1 ABC transporter ATP-binding protein                                          |
| 1385415 | 1465266 | 79851 OXZ24939.1 | B9N52_06885 | 1407974 | 1409728 | -1 ABC transporter ATP-binding protein                                          |
| 1385415 | 1465266 | 79851 OXZ24940.1 | B9N52_06890 | 1409889 | 1410881 | 1 AraC family transcriptional regulator                                         |
| 1385415 | 1465266 | 79851 OXZ24941.1 | B9N52_06895 | 1411661 | 1412719 | -1 arsenical-resistance protein                                                 |
| 1385415 | 1465266 | 79851 OXZ24942.1 | B9N52_06900 | 1412750 | 1414501 | -1 arsenical pump-driving ATPase<br>arsenical resistance operon transcriptional |
| 1385415 | 1465266 | 79851 OXZ24943.1 | B9N52_06905 | 1414520 | 1414885 | -1 repressor ArsD                                                               |
| 1385415 | 1465266 | 79851 OXZ24944.1 | B9N52_06910 | 1414905 | 1415219 | -1 transcriptional regulator                                                    |
| 1385415 | 1465266 | 79851 OXZ24945.1 | B9N52_06915 | 1415958 | 1416413 | 1 penicillinase repressor                                                       |
| 1385415 | 1465266 | 79851            | B9N52_06920 | 1416427 | 1418580 | 1 heavy metal translocating P-type ATPase                                       |
| 1385415 | 1465266 | 79851 OXZ24946.1 | B9N52_06925 | 1419254 | 1419859 | -1 cadmium resistance protein CadD                                              |
| 1385415 | 1465266 | 79851            | B9N52_06930 | 1420153 | 1420370 | -1 hypothetical protein                                                         |
| 1385415 | 1465266 | 79851 OXZ24947.1 | B9N52_06935 | 1420665 | 1421963 | -1 AAA family ATPase                                                            |
| 1385415 | 1465266 | 79851            | B9N52_06940 | 1422588 | 1422925 | -1 hypothetical protein                                                         |
| 1385415 | 1465266 | 79851 OXZ24948.1 | B9N52_06945 | 1423188 | 1423445 | -1 hypothetical protein                                                         |
| 1385415 | 1465266 | 79851 OXZ24949.1 | B9N52_06950 | 1423468 | 1425903 | -1 ABC transporter permease                                                     |
| 1385415 | 1465266 | 79851 OXZ24950.1 | B9N52_06955 | 1425896 | 1426576 | -1 peptide ABC transporter ATP-binding protein                                  |
| 1385415 | 1465266 | 79851 OXZ24951.1 | B9N52_06960 | 1426623 | 1427483 | -1 two-component sensor histidine kinase                                        |
| 1385415 | 1465266 | 79851 OXZ24952.1 | B9N52_06965 | 1427485 | 1428135 | -1 DNA-binding response regulator                                               |
| 1385415 | 1465266 | 79851            | B9N52_06970 | 1428709 | 1429124 | -1 RNA polymerase subunit sigma                                                 |
| 1385415 | 1465266 | 79851 OXZ24953.1 | B9N52_06975 | 1429436 | 1430788 | -1 MATE family efflux transporter                                               |
| 1385415 | 1465266 | 79851 OXZ24954.1 | B9N52_06980 | 1430815 | 1432560 | -1 ABC transporter permease                                                     |
| 1385415 | 1465266 | 79851 OXZ24955.1 | B9N52_06985 | 1432553 | 1434343 | -1 ABC transporter ATP-binding protein                                          |
| 1385415 | 1465266 | 79851 OXZ24956.1 | B9N52_06990 | 1434333 | 1435802 | -1 ABC transporter                                                              |
| 1385415 | 1465266 | 79851 OXZ24957.1 | B9N52_06995 | 1435787 | 1436500 | -1 ABC transporter permease                                                     |
| 1385415 | 1465266 | 79851 OXZ24958.1 | B9N52_07000 | 1436490 | 1437086 | -1 hypothetical protein                                                         |
| 1385415 | 1465266 | 79851 OXZ25016.1 | B9N52_07005 | 1437210 | 1437848 | -1 TetR family transcriptional regulator                                        |
| 1385415 | 1465266 | 79851 OXZ24959.1 | B9N52_07010 | 1437920 | 1439482 | -1 recombinase family protein                                                   |
| 1385415 | 1465266 | 79851 OXZ24960.1 | B9N52_07015 | 1439475 | 1439891 | -1 integrase                                                                    |
| 1385415 | 1465266 | 79851 OXZ24961.1 | B9N52_07020 | 1439884 | 1441446 | -1 recombinase family protein                                                   |
| 1385415 | 1465266 | 79851 OXZ24962.1 | B9N52_07025 | 1441506 | 1441715 | -1 hypothetical protein                                                         |
| 1385415 | 1465266 | 79851 OXZ24963.1 | B9N52_07030 | 1442081 | 1443817 | -1 multidrug ABC transporter ATP-binding protein                                |
| 1385415 | 1465266 | 79851 OXZ24964.1 | B9N52_07035 | 1443810 | 1445531 | -1 ABC transporter ATP-binding protein                                          |
| 1385415 | 1465266 | 79851 OXZ24965.1 | B9N52_07040 | 1445569 | 1446921 | -1 MATE family efflux transporter                                               |
| 1385415 | 1465266 | 79851 OXZ24966.1 | B9N52_07045 | 1446934 | 1448382 | -1 ABC transporter                                                              |
| 1385415 | 1465266 | 79851 OXZ24967.1 | B9N52_07050 | 1448379 | 1449068 | -1 ABC transporter permease                                                     |
| 1385415 | 1465266 | 79851 OXZ24968.1 | B9N52_07055 | 1449068 | 1449646 | -1 hypothetical protein                                                         |
| 1385415 | 1465266 | 79851 OXZ24969.1 | B9N52_07060 | 1449698 | 1450270 | -1 TetR family transcriptional regulator                                        |
| 1385415 | 1465266 | 79851 OXZ24970.1 | B9N52_07065 | 1450563 | 1450919 | 1 plasmid mobilization relaxosome protein MobC                                  |
| 1385415 | 1465266 | 79851            | B9N52_07070 | 1450921 | 1452251 | 1 endonuclease                                                                  |
| 1385415 | 1465266 | 79851 OXZ24971.1 | B9N52_07075 | 1452255 | 1453496 | -1 DNA (cytosine-5-)-methyltransferase                                          |
| 1385415 | 1465266 | 79851 OXZ24972.1 | B9N52_07080 | 1453493 | 1454986 | -1 hypothetical protein                                                         |
| 1385415 | 1465266 | 79851 OXZ24973.1 | B9N52_07085 | 1454976 | 1457147 | -1 hypothetical protein                                                         |
| 1385415 | 1465266 | 79851 OXZ24974.1 | B9N52_07090 | 1457198 | 1457419 | -1 transcriptional regulator                                                    |
| 1385415 | 1465266 | 79851            | B9N52_07095 | 1457704 | 1458141 | -1 hypothetical protein                                                         |
| 1385415 | 1465266 | 79851 OXZ24975.1 | B9N52_07100 | 1458874 | 1459461 | -1 transcriptional regulator<br>23S rRNA (uracil(1939)-C(5))-methyltransferase  |
| 1385415 | 1465266 | 79851 OXZ24976.1 | B9N52_07105 | 1459959 | 1461173 | -1 RlmD                                                                         |
| 1385415 | 1465266 | 79851 OXZ24977.1 | B9N52_07110 | 1461266 | 1463062 | -1 ABC transporter                                                              |
| 1385415 | 1465266 | 79851 OXZ24978.1 | B9N52_07115 | 1463055 | 1464815 | -1 multidrug ABC transporter ATP-binding protein                                |
| 1385415 | 1465266 | 79851 OXZ24979.1 | B9N52_07120 | 1464790 | 1465266 | -1 MarR family transcriptional regulator                                        |
| 1399146 | 1406257 | 7111 OXZ25017.1  | B9N52_06850 | 1399146 | 1399876 | -1 macrolide ABC transporter ATP-binding protein                                |
| 1399146 | 1406257 | 7111 OXZ24933.1  | B9N52_06855 | 1401405 | 1402019 | -1 hypothetical protein                                                         |
| 1399146 | 1406257 | 7111 OXZ24934.1  | B9N52_06860 | 1402226 | 1403590 | -1 ABC transporter ATP-binding protein                                          |
| 1399146 | 1406257 | 7111 OXZ24935.1  | B9N52_06865 | 1403578 | 1404273 | -1 cobalt ABC transporter permease                                              |
| 1399146 | 1406257 | 7111 OXZ24936.1  | B9N52_06870 | 1404273 | 1404854 | -1 hypothetical protein                                                         |
| 1399146 | 1406257 | 7111 OXZ24937.1  | B9N52_06875 | 1404914 | 1406257 | -1 MATE family efflux transporter                                               |
| 1420153 | 1425903 | 5750             | B9N52_06930 | 1420153 | 1420370 | -1 hypothetical protein                                                         |
| 1420153 | 1425903 | 5750 OXZ24947.1  | B9N52_06935 | 1420665 | 1421963 | -1 AAA family ATPase                                                            |
| 1420153 | 1425903 | 5750             | B9N52_06940 | 1422588 | 1422925 | -1 hypothetical protein                                                         |
| 1420153 | 1425903 | 5750 OXZ24948.1  | B9N52_06945 | 1423188 | 1423445 | -1 hypothetical protein                                                         |
| 1420153 | 1425903 | 5750 OXZ24949.1  | B9N52_06950 | 1423468 | 1425903 | -1 ABC transporter permease                                                     |

|         |         |                  |             |         |         |                                                  |
|---------|---------|------------------|-------------|---------|---------|--------------------------------------------------|
| 1420153 | 1425903 | 5750 OXZ24950.1  | B9N52_06955 | 1425896 | 1426576 | -1 peptide ABC transporter ATP-binding protein   |
| 1441506 | 1450919 | 9413 OXZ24962.1  | B9N52_07025 | 1441506 | 1441715 | -1 hypothetical protein                          |
| 1441506 | 1450919 | 9413 OXZ24963.1  | B9N52_07030 | 1442081 | 1443817 | -1 multidrug ABC transporter ATP-binding protein |
| 1441506 | 1450919 | 9413 OXZ24964.1  | B9N52_07035 | 1443810 | 1445531 | -1 ABC transporter ATP-binding protein           |
| 1441506 | 1450919 | 9413 OXZ24965.1  | B9N52_07040 | 1445569 | 1446921 | -1 MATE family efflux transporter                |
| 1441506 | 1450919 | 9413 OXZ24966.1  | B9N52_07045 | 1446934 | 1448382 | -1 ABC transporter                               |
| 1441506 | 1450919 | 9413 OXZ24967.1  | B9N52_07050 | 1448379 | 1449068 | -1 ABC transporter permease                      |
| 1441506 | 1450919 | 9413 OXZ24968.1  | B9N52_07055 | 1449068 | 1449646 | -1 hypothetical protein                          |
| 1441506 | 1450919 | 9413 OXZ24969.1  | B9N52_07060 | 1449698 | 1450270 | -1 TetR family transcriptional regulator         |
| 1441506 | 1450919 | 9413 OXZ24970.1  | B9N52_07065 | 1450563 | 1450919 | 1 plasmid mobilization relaxosome protein MobC   |
| 1771981 | 1789695 | 17714 OXZ24924.1 | B9N52_08540 | 1771981 | 1773342 | 1 hypothetical protein                           |
| 1771981 | 1789695 | 17714 OXZ24684.1 | B9N52_08575 | 1774499 | 1775197 | -1 hypothetical protein                          |
| 1771981 | 1789695 | 17714 OXZ24685.1 | B9N52_08580 | 1775356 | 1775895 | -1 transposase                                   |
| 1771981 | 1789695 | 17714 OXZ24682.1 | B9N52_08585 | 1784312 | 1784851 | 1 transposase                                    |
| 1771981 | 1789695 | 17714 OXZ24683.1 | B9N52_08590 | 1784914 | 1785708 | 1 hypothetical protein                           |
| 1771981 | 1789695 | 17714 OXZ24688.1 | B9N52_08545 | 1788311 | 1789105 | -1 transposase                                   |
| 1771981 | 1789695 | 17714 OXZ24689.1 | B9N52_08550 | 1789129 | 1789695 | -1 transposase                                   |
| 1774499 | 1789105 | 14606 OXZ24684.1 | B9N52_08575 | 1774499 | 1775197 | -1 hypothetical protein                          |
| 1774499 | 1789105 | 14606 OXZ24685.1 | B9N52_08580 | 1775356 | 1775895 | -1 transposase                                   |
| 1774499 | 1789105 | 14606 OXZ24682.1 | B9N52_08585 | 1784312 | 1784851 | 1 transposase                                    |
| 1774499 | 1789105 | 14606 OXZ24683.1 | B9N52_08590 | 1784914 | 1785708 | 1 hypothetical protein                           |
| 1774499 | 1789105 | 14606 OXZ24688.1 | B9N52_08545 | 1788311 | 1789105 | -1 transposase                                   |



**Table S3K: Predicted genomic islands in the genome of "F. nericia" ATCC53516**

Shown are genes of genomic islands predicted by IslandViewer4

| Island start | Island end | Length | Gene name  | Locus            | Gene start | Gene end | Strand | Product                                       |
|--------------|------------|--------|------------|------------------|------------|----------|--------|-----------------------------------------------|
| 235768       | 246338     | 10570  | EFH93375.1 | HMPREF0391_11033 | 235768     | 236637   | 1      | hypothetical protein                          |
| 235768       | 246338     | 10570  | EFH93374.1 | HMPREF0391_11032 | 236624     | 238612   | 1      | DHHA1 domain protein                          |
| 235768       | 246338     | 10570  | EFH93373.1 | HMPREF0391_11031 | 238593     | 239039   | 1      | ribosomal protein L9                          |
| 235768       | 246338     | 10570  | EFH93372.1 | HMPREF0391_11030 | 239073     | 240410   | 1      | replicative DNA helicase                      |
| 235768       | 246338     | 10570  | EFH93371.1 | HMPREF0391_11029 | 240407     | 240970   | 1      | acetyltransferase, GNAT family                |
| 235768       | 246338     | 10570  | EFH93370.1 | HMPREF0391_11028 | 240954     | 241733   | 1      | DnaD domain protein                           |
| 235768       | 246338     | 10570  | EFH93369.1 | HMPREF0391_11027 | 241736     | 242713   | 1      | DNA replication protein DnaC                  |
| 235768       | 246338     | 10570  | EFH93368.1 | HMPREF0391_11026 | 242710     | 243354   | 1      | YjeF-like protein                             |
| 235768       | 246338     | 10570  | EFH93367.1 | HMPREF0391_11025 | 244071     | 244613   | 1      | hypothetical protein                          |
| 235768       | 246338     | 10570  | EFH93366.1 | HMPREF0391_11024 | 244597     | 245283   | 1      | hypothetical protein                          |
| 235768       | 246338     | 10570  | EFH93365.1 | HMPREF0391_11023 | 245337     | 246053   | 1      | putative phage head-tail adaptor              |
| 235768       | 246338     | 10570  | EFH93364.1 | HMPREF0391_11022 | 246111     | 246338   | 1      | hypothetical protein                          |
| 294189       | 302405     | 8216   | EFH93316.1 | HMPREF0391_10974 | 294189     | 294389   | 1      | DNA-binding helix-turn-helix protein          |
| 294189       | 302405     | 8216   | EFH93315.1 | HMPREF0391_10973 | 294390     | 294839   | 1      | hypothetical protein                          |
| 294189       | 302405     | 8216   | EFH93314.1 | HMPREF0391_10972 | 294976     | 295641   | 1      | hypothetical protein                          |
| 294189       | 302405     | 8216   | EFH93313.1 | HMPREF0391_10971 | 295802     | 296746   | 1      | DnaJ domain protein                           |
| 294189       | 302405     | 8216   | EFH93312.1 | HMPREF0391_10970 | 296765     | 299350   | 1      | ATP-dependent chaperone protein ClpB          |
| 294189       | 302405     | 8216   | EFH93311.1 | HMPREF0391_10969 | 299626     | 300015   | -1     | hypothetical protein                          |
| 294189       | 302405     | 8216   | EFH93310.1 | HMPREF0391_10968 | 300091     | 300954   | 1      | UTP--glucose-1-phosphate uridylyltransferase  |
| 294189       | 302405     | 8216   | EFH93309.1 | HMPREF0391_10967 | 301037     | 301732   | 1      | response regulator receiver domain protein    |
| 294189       | 302405     | 8216   | EFH93308.1 | HMPREF0391_10966 | 301740     | 302405   | 1      | hypothetical protein                          |
| 349541       | 354034     | 4493   | EFH93269.1 | HMPREF0391_10927 | 349438     | 349557   | 1      | hypothetical protein                          |
| 349541       | 354034     | 4493   | EFH93268.1 | HMPREF0391_10926 | 349541     | 349756   | 1      | hypothetical protein                          |
| 349541       | 354034     | 4493   | EFH93267.1 | HMPREF0391_10925 | 352820     | 354034   | -1     | transposase, Mutator family                   |
| 494767       | 499382     | 4615   | EFH93134.1 | HMPREF0391_10792 | 494767     | 494967   | 1      | hypothetical protein                          |
| 494767       | 499382     | 4615   | EFH93133.1 | HMPREF0391_10791 | 495132     | 496514   | -1     | domain protein                                |
| 494767       | 499382     | 4615   | EFH93132.1 | HMPREF0391_10790 | 496505     | 497164   | -1     | response regulator receiver domain protein    |
| 494767       | 499382     | 4615   | EFH93131.1 | HMPREF0391_10789 | 497197     | 497964   | -1     | antibiotic ABC transporter protein MutG       |
| 494767       | 499382     | 4615   | EFH93130.1 | HMPREF0391_10788 | 497937     | 498677   | -1     | mutacin ABC transporter protein, MutE         |
| 494767       | 499382     | 4615   | EFH93129.1 | HMPREF0391_10787 | 498681     | 499382   | -1     | MutF                                          |
| 971218       | 980556     | 9338   | EFH92519.1 | HMPREF0391_11491 | 971218     | 972198   | -1     | site-specific tyrosine recombinase XerC       |
| 971218       | 980556     | 9338   | EFH92520.1 | HMPREF0391_11492 | 972301     | 973476   | -1     | aminotransferase, class I/II                  |
| 971218       | 980556     | 9338   | EFH92521.1 | HMPREF0391_11493 | 973463     | 974284   | -1     | PHP domain protein                            |
| 971218       | 980556     | 9338   | EFH92522.1 | HMPREF0391_11494 | 974353     | 975894   | -1     | YmdA/YtgF family protein                      |
| 971218       | 980556     | 9338   | EFH92523.1 | HMPREF0391_11495 | 976013     | 976675   | -1     | hypothetical protein                          |
| 971218       | 980556     | 9338   | EFH92524.1 | HMPREF0391_11496 | 976662     | 976901   | -1     | hypothetical protein                          |
| 971218       | 980556     | 9338   | EFH92525.1 | HMPREF0391_11497 | 976901     | 978484   | -1     | hypothetical protein                          |
| 971218       | 980556     | 9338   | EFH92526.1 | HMPREF0391_11498 | 978484     | 979437   | -1     | phosphodiesterase family protein              |
| 971218       | 980556     | 9338   | EFH92527.1 | HMPREF0391_11499 | 979465     | 980556   | -1     | RecA protein                                  |
| 1135806      | 1139907    | 4101   | EFH92677.1 | HMPREF0391_11649 | 1135806    | 1136735  | -1     | ABC transporter, permease protein             |
| 1135806      | 1139907    | 4101   | EFH92678.1 | HMPREF0391_11650 | 1136737    | 1137441  | -1     | TOBE domain protein                           |
| 1135806      | 1139907    | 4101   | EFH92679.1 | HMPREF0391_11651 | 1137658    | 1138644  | 1      | integrase core domain protein                 |
| 1135806      | 1139907    | 4101   | EFH92680.1 | HMPREF0391_11652 | 1138613    | 1138924  | -1     | protein                                       |
| 1135806      | 1139907    | 4101   | EFH92681.1 | HMPREF0391_11653 | 1139134    | 1139907  | 1      | transcriptional regulator, DeoR family        |
| 1172805      | 1217320    | 44515  | EFH92708.1 | HMPREF0391_11680 | 1172805    | 1173215  | -1     | hypothetical protein                          |
| 1172805      | 1217320    | 44515  | EFH92709.1 | HMPREF0391_11681 | 1173535    | 1174884  | -1     | MATE efflux family protein                    |
| 1172805      | 1217320    | 44515  | EFH92710.1 | HMPREF0391_11682 | 1174921    | 1176654  | -1     | ABC transporter, ATP-binding protein          |
| 1172805      | 1217320    | 44515  | EFH92711.1 | HMPREF0391_11683 | 1176651    | 1178393  | -1     | ABC transporter, ATP-binding protein          |
| 1172805      | 1217320    | 44515  | EFH92712.1 | HMPREF0391_11684 | 1178429    | 1179820  | -1     | ABC transporter, ATP-binding protein          |
| 1172805      | 1217320    | 44515  | EFH92713.1 | HMPREF0391_11685 | 1179813    | 1180514  | -1     | cobalt transport protein                      |
| 1172805      | 1217320    | 44515  | EFH92714.1 | HMPREF0391_11686 | 1180539    | 1181120  | -1     | conserved hypothetical protein TIGR02185      |
| 1172805      | 1217320    | 44515  | EFH92715.1 | HMPREF0391_11687 | 1181138    | 1181749  | -1     | transcriptional regulator, TetR family        |
| 1172805      | 1217320    | 44515  | EFH92716.1 | HMPREF0391_11688 | 1181938    | 1182417  | 1      | hypothetical protein                          |
| 1172805      | 1217320    | 44515  | EFH92717.1 | HMPREF0391_11689 | 1182419    | 1183750  | 1      | relaxase/mobilization nuclease domain protein |
| 1172805      | 1217320    | 44515  | EFH92718.1 | HMPREF0391_11690 | 1183771    | 1184268  | -1     | hypothetical protein                          |
| 1172805      | 1217320    | 44515  | EFH92719.1 | HMPREF0391_11691 | 1184269    | 1185690  | -1     | hypothetical protein                          |
| 1172805      | 1217320    | 44515  | EFH92720.1 | HMPREF0391_11692 | 1185725    | 1185940  | -1     | hypothetical protein                          |
| 1172805      | 1217320    | 44515  | EFH92721.1 | HMPREF0391_11693 | 1186041    | 1186274  | -1     | hypothetical protein                          |
| 1172805      | 1217320    | 44515  | EFH92722.1 | HMPREF0391_11694 | 1186387    | 1187049  | -1     | hypothetical protein                          |
| 1172805      | 1217320    | 44515  | EFH92723.1 | HMPREF0391_11695 | 1187065    | 1194735  | -1     | helicase C-terminal domain protein            |
| 1172805      | 1217320    | 44515  | EFH92724.1 | HMPREF0391_11696 | 1194818    | 1197031  | -1     | hypothetical protein                          |
| 1172805      | 1217320    | 44515  | EFH92725.1 | HMPREF0391_11697 | 1197067    | 1198029  | -1     | DNA (cytosine-5-)-methyltransferase           |
| 1172805      | 1217320    | 44515  | EFH92726.1 | HMPREF0391_11698 | 1198022    | 1199755  | -1     | DNA topoisomerase                             |
| 1172805      | 1217320    | 44515  | EFH92727.1 | HMPREF0391_11699 | 1199807    | 1200673  | -1     | hypothetical protein                          |
| 1172805      | 1217320    | 44515  | EFH92728.1 | HMPREF0391_11700 | 1200688    | 1201758  | -1     | copper amine oxidase domain protein           |
| 1172805      | 1217320    | 44515  | EFH92729.1 | HMPREF0391_11701 | 1201839    | 1203038  | -1     | hypothetical protein                          |
| 1172805      | 1217320    | 44515  | EFH92730.1 | HMPREF0391_11702 | 1203025    | 1203264  | -1     | hypothetical protein                          |
| 1172805      | 1217320    | 44515  | EFH92731.1 | HMPREF0391_11703 | 1203354    | 1204529  | -1     | NlpC/P60 family protein                       |
| 1172805      | 1217320    | 44515  | EFH92732.1 | HMPREF0391_11704 | 1204692    | 1204973  | -1     | hypothetical protein                          |
| 1172805      | 1217320    | 44515  | EFH92733.1 | HMPREF0391_11705 | 1205024    | 1205908  | -1     | transposase, Mutator family                   |
| 1172805      | 1217320    | 44515  | EFH92734.1 | HMPREF0391_11706 | 1205958    | 1207439  | -1     | hypothetical protein                          |
| 1172805      | 1217320    | 44515  | EFH92735.1 | HMPREF0391_11707 | 1207447    | 1209870  | -1     | hypothetical protein                          |
| 1172805      | 1217320    | 44515  | EFH92736.1 | HMPREF0391_11708 | 1209761    | 1210171  | -1     | hypothetical protein                          |
| 1172805      | 1217320    | 44515  | EFH92737.1 | HMPREF0391_11709 | 1210173    | 1210463  | -1     | hypothetical protein                          |
| 1172805      | 1217320    | 44515  | EFH92738.1 | HMPREF0391_11710 | 1210473    | 1211336  | -1     | hypothetical protein                          |
| 1172805      | 1217320    | 44515  | EFH92739.1 | HMPREF0391_11711 | 1211347    | 1211562  | -1     | hypothetical protein                          |
| 1172805      | 1217320    | 44515  | EFH92740.1 | HMPREF0391_11712 | 1211564    | 1211875  | -1     | hypothetical protein                          |
| 1172805      | 1217320    | 44515  | EFH92741.1 | HMPREF0391_11713 | 1212066    | 1212341  | -1     | hypothetical protein                          |

|         |         |       |            |                  |         |         |                                                   |
|---------|---------|-------|------------|------------------|---------|---------|---------------------------------------------------|
| 1172805 | 1217320 | 44515 | EFH92742.1 | HMPREF0391_11714 | 1212360 | 1214156 | -1 TraG/TraD family protein                       |
| 1172805 | 1217320 | 44515 | EFH92743.1 | HMPREF0391_11715 | 1214149 | 1214883 | -1 BRO family, N-terminal domain protein          |
| 1172805 | 1217320 | 44515 | EFH92744.1 | HMPREF0391_11716 | 1214880 | 1215365 | -1 hypothetical protein                           |
| 1172805 | 1217320 | 44515 | EFH92745.1 | HMPREF0391_11717 | 1215358 | 1216185 | -1 chromosomal replication initiator protein DnaA |
| 1172805 | 1217320 | 44515 | EFH92746.1 | HMPREF0391_11718 | 1216182 | 1216955 | -1 replication initiator protein A domain protein |
| 1172805 | 1217320 | 44515 | EFH92747.1 | HMPREF0391_11719 | 1217039 | 1217320 | -1 hypothetical protein                           |
| 1203025 | 1207439 | 4414  | EFH92729.1 | HMPREF0391_11701 | 1201839 | 1203038 | -1 hypothetical protein                           |
| 1203025 | 1207439 | 4414  | EFH92730.1 | HMPREF0391_11702 | 1203025 | 1203264 | -1 hypothetical protein                           |
| 1203025 | 1207439 | 4414  | EFH92731.1 | HMPREF0391_11703 | 1203354 | 1204529 | -1 NlpC/P60 family protein                        |
| 1203025 | 1207439 | 4414  | EFH92732.1 | HMPREF0391_11704 | 1204692 | 1204973 | -1 hypothetical protein                           |
| 1203025 | 1207439 | 4414  | EFH92733.1 | HMPREF0391_11705 | 1205024 | 1205908 | -1 transposase, Mutator family                    |
| 1203025 | 1207439 | 4414  | EFH92734.1 | HMPREF0391_11706 | 1205958 | 1207439 | -1 hypothetical protein                           |
| 1211564 | 1217320 | 5756  | EFH92740.1 | HMPREF0391_11712 | 1211564 | 1211875 | -1 hypothetical protein                           |
| 1211564 | 1217320 | 5756  | EFH92741.1 | HMPREF0391_11713 | 1212066 | 1212341 | -1 hypothetical protein                           |
| 1211564 | 1217320 | 5756  | EFH92742.1 | HMPREF0391_11714 | 1212360 | 1214156 | -1 TraG/TraD family protein                       |
| 1211564 | 1217320 | 5756  | EFH92743.1 | HMPREF0391_11715 | 1214149 | 1214883 | -1 BRO family, N-terminal domain protein          |
| 1211564 | 1217320 | 5756  | EFH92744.1 | HMPREF0391_11716 | 1214880 | 1215365 | -1 hypothetical protein                           |
| 1211564 | 1217320 | 5756  | EFH92745.1 | HMPREF0391_11717 | 1215358 | 1216185 | -1 chromosomal replication initiator protein DnaA |
| 1211564 | 1217320 | 5756  | EFH92746.1 | HMPREF0391_11718 | 1216182 | 1216955 | -1 replication initiator protein A domain protein |
| 1211564 | 1217320 | 5756  | EFH92747.1 | HMPREF0391_11719 | 1217039 | 1217320 | -1 hypothetical protein                           |
| 1349537 | 1383336 | 33799 | EFH93638.1 | HMPREF0391_10006 | 1348897 | 1349553 | -1 chain length determinant protein               |
| 1349537 | 1383336 | 33799 | EFH93639.1 | HMPREF0391_10007 | 1349537 | 1350316 | -1 hypothetical protein                           |
| 1349537 | 1383336 | 33799 | EFH93640.1 | HMPREF0391_10008 | 1350317 | 1350739 | -1 SH3 domain protein                             |
| 1349537 | 1383336 | 33799 | EFH93641.1 | HMPREF0391_10009 | 1350920 | 1351444 | 1 topology modulation protein                     |
| 1349537 | 1383336 | 33799 | EFH93642.1 | HMPREF0391_10010 | 1351534 | 1352748 | 1 transposase, Mutator family                     |
| 1349537 | 1383336 | 33799 | EFH93643.1 | HMPREF0391_10011 | 1353139 | 1361259 | -1 LPXTG-motif cell wall anchor domain protein    |
| 1349537 | 1383336 | 33799 | EFH93644.1 | HMPREF0391_10012 | 1362088 | 1363713 | -1 LPXTG-motif cell wall anchor domain protein    |
| 1349537 | 1383336 | 33799 | EFH93645.1 | HMPREF0391_10013 | 1363706 | 1363873 | 1 hypothetical protein                            |
| 1349537 | 1383336 | 33799 | EFH93646.1 | HMPREF0391_10014 | 1367492 | 1367641 | -1 hypothetical protein                           |
| 1349537 | 1383336 | 33799 | EFH93647.1 | HMPREF0391_10015 | 1367678 | 1371538 | -1 hypothetical protein                           |
| 1349537 | 1383336 | 33799 | EFH93648.1 | HMPREF0391_10016 | 1371646 | 1371777 | -1 hypothetical protein                           |
| 1349537 | 1383336 | 33799 | EFH93649.1 | HMPREF0391_10017 | 1373225 | 1375135 | -1 LPXTG-motif cell wall anchor domain protein    |
| 1349537 | 1383336 | 33799 | EFH93650.1 | HMPREF0391_10018 | 1375655 | 1375777 | -1 hypothetical protein                           |
| 1349537 | 1383336 | 33799 | EFH93651.1 | HMPREF0391_10019 | 1375808 | 1376242 | -1 acetyltransferase, GNAT family                 |
| 1349537 | 1383336 | 33799 | EFH93652.1 | HMPREF0391_10020 | 1376265 | 1376963 | -1 putative TIGR02206 family protein              |
| 1349537 | 1383336 | 33799 | EFH93653.1 | HMPREF0391_10021 | 1376963 | 1377682 | -1 hypothetical protein                           |
| 1349537 | 1383336 | 33799 | EFH93654.1 | HMPREF0391_10022 | 1378623 | 1381976 | -1 efflux ABC transporter, permease protein       |
| 1349537 | 1383336 | 33799 | EFH93655.1 | HMPREF0391_10023 | 1381978 | 1382679 | -1 ABC transporter, ATP-binding protein           |
| 1349537 | 1383336 | 33799 | EFH93656.1 | HMPREF0391_10024 | 1382791 | 1383336 | 1 transcriptional regulator, TetR family          |
| 1431249 | 1529242 | 97993 | EFH93711.1 | HMPREF0391_10079 | 1431249 | 1431857 | -1 methyltransferase domain protein               |
| 1431249 | 1529242 | 97993 | EFH93712.1 | HMPREF0391_10080 | 1431960 | 1432244 | -1 hypothetical protein                           |
| 1431249 | 1529242 | 97993 | EFH93713.1 | HMPREF0391_10081 | 1432455 | 1432946 | -1 hypothetical protein                           |
| 1431249 | 1529242 | 97993 | EFH93714.1 | HMPREF0391_10082 | 1433194 | 1433943 | -1 hypothetical protein                           |
| 1431249 | 1529242 | 97993 | EFH93715.1 | HMPREF0391_10083 | 1434203 | 1435807 | -1 ABC transporter, ATP-binding protein           |
| 1431249 | 1529242 | 97993 | EFH93716.1 | HMPREF0391_10084 | 1436535 | 1437149 | -1 hypothetical protein                           |
| 1431249 | 1529242 | 97993 | EFH93717.1 | HMPREF0391_10085 | 1437358 | 1438722 | -1 ABC transporter, ATP-binding protein           |
| 1431249 | 1529242 | 97993 | EFH93718.1 | HMPREF0391_10086 | 1438716 | 1439405 | -1 cobalt transport protein                       |
| 1431249 | 1529242 | 97993 | EFH93719.1 | HMPREF0391_10087 | 1439405 | 1439989 | -1 conserved hypothetical protein TIGR02185       |
| 1431249 | 1529242 | 97993 | EFH93720.1 | HMPREF0391_10088 | 1440049 | 1441407 | -1 MATE efflux family protein                     |
| 1431249 | 1529242 | 97993 | EFH93721.1 | HMPREF0391_10089 | 1441404 | 1443125 | -1 ABC transporter, ATP-binding protein           |
| 1431249 | 1529242 | 97993 | EFH93722.1 | HMPREF0391_10090 | 1443109 | 1444869 | -1 ABC transporter, ATP-binding protein           |
| 1431249 | 1529242 | 97993 | EFH93723.1 | HMPREF0391_10091 | 1445024 | 1446016 | 1 transcriptional regulator, AraC family          |
| 1431249 | 1529242 | 97993 | EFH93724.1 | HMPREF0391_10092 | 1446278 | 1446817 | 1 transposase                                     |
| 1431249 | 1529242 | 97993 | EFH93725.1 | HMPREF0391_10093 | 1447012 | 1447716 | 1 integrase core domain protein                   |
| 1431249 | 1529242 | 97993 | EFH93726.1 | HMPREF0391_10094 | 1447946 | 1449160 | -1 transposase, Mutator family                    |
| 1431249 | 1529242 | 97993 | EFH93727.1 | HMPREF0391_10095 | 1449521 | 1450117 | -1 hypothetical protein                           |
| 1431249 | 1529242 | 97993 | EFH93728.1 | HMPREF0391_10096 | 1450260 | 1452002 | -1 ABC transporter, ATP-binding protein           |
| 1431249 | 1529242 | 97993 | EFH93729.1 | HMPREF0391_10097 | 1451989 | 1453710 | -1 ABC transporter, ATP-binding protein           |
| 1431249 | 1529242 | 97993 | EFH93730.1 | HMPREF0391_10098 | 1453710 | 1455173 | -1 ABC transporter, ATP-binding protein           |
| 1431249 | 1529242 | 97993 | EFH93731.1 | HMPREF0391_10099 | 1455175 | 1455846 | -1 cobalt transport protein                       |
| 1431249 | 1529242 | 97993 | EFH93732.1 | HMPREF0391_10100 | 1455843 | 1456433 | -1 conserved hypothetical protein TIGR02185       |
| 1431249 | 1529242 | 97993 | EFH93733.1 | HMPREF0391_10101 | 1456500 | 1457477 | -1 transcriptional regulator, AraC family         |
| 1431249 | 1529242 | 97993 | EFH93734.1 | HMPREF0391_10102 | 1457487 | 1458089 | -1 transcriptional regulator, TetR family         |
| 1431249 | 1529242 | 97993 | EFH93735.1 | HMPREF0391_10103 | 1458205 | 1458381 | -1 hypothetical protein                           |
| 1431249 | 1529242 | 97993 | EFH93736.1 | HMPREF0391_10104 | 1458528 | 1458791 | 1 hypothetical protein                            |
| 1431249 | 1529242 | 97993 | EFH93737.1 | HMPREF0391_10105 | 1459309 | 1459572 | -1 hypothetical protein                           |
| 1431249 | 1529242 | 97993 | EFH93738.1 | HMPREF0391_10106 | 1459749 | 1460726 | -1 caspase domain protein                         |
| 1431249 | 1529242 | 97993 | EFH93739.1 | HMPREF0391_10107 | 1460746 | 1461123 | -1 hypothetical protein                           |
| 1431249 | 1529242 | 97993 | EFH93740.1 | HMPREF0391_10108 | 1461126 | 1461293 | -1 hypothetical protein                           |
| 1431249 | 1529242 | 97993 | EFH93741.1 | HMPREF0391_10109 | 1461517 | 1461984 | -1 hypothetical protein                           |
| 1431249 | 1529242 | 97993 | EFH93742.1 | HMPREF0391_10110 | 1462046 | 1462837 | -1 CAAX amino terminal protease family protein    |
| 1431249 | 1529242 | 97993 | EFH93743.1 | HMPREF0391_10111 | 1463678 | 1464328 | -1 hypothetical protein                           |
| 1431249 | 1529242 | 97993 | EFH93744.1 | HMPREF0391_10112 | 1464635 | 1465384 | -1 hypothetical protein                           |
| 1431249 | 1529242 | 97993 | EFH93745.1 | HMPREF0391_10113 | 1465957 | 1467390 | -1 hypothetical protein                           |
| 1431249 | 1529242 | 97993 | EFH93746.1 | HMPREF0391_10114 | 1467431 | 1467751 | -1 hypothetical protein                           |
| 1431249 | 1529242 | 97993 | EFH93747.1 | HMPREF0391_10115 | 1467931 | 1468203 | -1 hypothetical protein                           |
| 1431249 | 1529242 | 97993 | EFH93748.1 | HMPREF0391_10116 | 1468489 | 1469475 | 1 integrase core domain protein                   |
| 1431249 | 1529242 | 97993 | EFH93749.1 | HMPREF0391_10117 | 1469778 | 1471130 | -1 MATE efflux family protein                     |
| 1431249 | 1529242 | 97993 | EFH93750.1 | HMPREF0391_10118 | 1471157 | 1472902 | -1 ABC transporter, ATP-binding protein           |
| 1431249 | 1529242 | 97993 | EFH93751.1 | HMPREF0391_10119 | 1472895 | 1474688 | -1 ABC transporter, ATP-binding protein           |
| 1431249 | 1529242 | 97993 | EFH93752.1 | HMPREF0391_10120 | 1474675 | 1476144 | -1 ABC transporter, ATP-binding protein           |
| 1431249 | 1529242 | 97993 | EFH93753.1 | HMPREF0391_10121 | 1476129 | 1476842 | -1 cobalt transport protein                       |

|         |         |       |            |                  |         |         |                                                  |
|---------|---------|-------|------------|------------------|---------|---------|--------------------------------------------------|
| 1431249 | 1529242 | 97993 | EFH93754.1 | HMPREF0391_10122 | 1476832 | 1477428 | -1 conserved hypothetical protein TIGR02185      |
| 1431249 | 1529242 | 97993 | EFH93755.1 | HMPREF0391_10123 | 1477552 | 1478271 | -1 transcriptional regulator, TetR family        |
| 1431249 | 1529242 | 97993 | EFH93756.1 | HMPREF0391_10124 | 1478262 | 1479827 | -1 resolvase, N-terminal domain protein          |
| 1431249 | 1529242 | 97993 | EFH93757.1 | HMPREF0391_10125 | 1479817 | 1480233 | -1 recombinase                                   |
| 1431249 | 1529242 | 97993 | EFH93758.1 | HMPREF0391_10126 | 1480226 | 1481788 | -1 resolvase, N-terminal domain protein          |
| 1431249 | 1529242 | 97993 | EFH93759.1 | HMPREF0391_10127 | 1481848 | 1482057 | -1 hypothetical protein                          |
| 1431249 | 1529242 | 97993 | EFH93760.1 | HMPREF0391_10128 | 1482421 | 1484157 | -1 ABC transporter, ATP-binding protein          |
| 1431249 | 1529242 | 97993 | EFH93761.1 | HMPREF0391_10129 | 1484150 | 1485889 | -1 ABC transporter, ATP-binding protein          |
| 1431249 | 1529242 | 97993 | EFH93762.1 | HMPREF0391_10130 | 1485873 | 1486496 | -1 transcriptional regulator, TetR family        |
| 1431249 | 1529242 | 97993 | EFH93763.1 | HMPREF0391_10131 | 1486640 | 1487449 | -1 Cpl-7 lysozyme C-terminal domain protein      |
| 1431249 | 1529242 | 97993 | EFH93764.1 | HMPREF0391_10132 | 1487450 | 1487851 | -1 toxin secretion/phage lysis holin             |
| 1431249 | 1529242 | 97993 | EFH93765.1 | HMPREF0391_10133 | 1487853 | 1489232 | -1 hypothetical protein                          |
| 1431249 | 1529242 | 97993 | EFH93766.1 | HMPREF0391_10134 | 1489219 | 1491090 | -1 hypothetical protein                          |
| 1431249 | 1529242 | 97993 | EFH93767.1 | HMPREF0391_10135 | 1491090 | 1491452 | -1 hypothetical protein                          |
| 1431249 | 1529242 | 97993 | EFH93768.1 | HMPREF0391_10136 | 1491452 | 1492948 | -1 TMP repeat protein                            |
| 1431249 | 1529242 | 97993 | EFH93769.1 | HMPREF0391_10137 | 1492818 | 1494518 | -1 phage tail tape measure protein, TP901 family |
| 1431249 | 1529242 | 97993 | EFH93770.1 | HMPREF0391_10138 | 1494581 | 1494907 | -1 hypothetical protein                          |
| 1431249 | 1529242 | 97993 | EFH93771.1 | HMPREF0391_10139 | 1494946 | 1495110 | -1 hypothetical protein                          |
| 1431249 | 1529242 | 97993 | EFH93772.1 | HMPREF0391_10140 | 1495128 | 1495484 | -1 hypothetical protein                          |
| 1431249 | 1529242 | 97993 | EFH93773.1 | HMPREF0391_10141 | 1495487 | 1496083 | -1 phage major tail protein, phi13 family        |
| 1431249 | 1529242 | 97993 | EFH93774.1 | HMPREF0391_10142 | 1496073 | 1496420 | -1 hypothetical protein                          |
| 1431249 | 1529242 | 97993 | EFH93775.1 | HMPREF0391_10143 | 1496413 | 1496793 | -1 hypothetical protein                          |
| 1431249 | 1529242 | 97993 | EFH93776.1 | HMPREF0391_10144 | 1496790 | 1497122 | -1 putative phage head-tail adaptor              |
| 1431249 | 1529242 | 97993 | EFH93777.1 | HMPREF0391_10145 | 1497122 | 1497394 | -1 phage DNA packaging protein                   |
| 1431249 | 1529242 | 97993 | EFH93778.1 | HMPREF0391_10146 | 1497405 | 1498595 | -1 phage major capsid protein, HK97 family       |
| 1431249 | 1529242 | 97993 | EFH93779.1 | HMPREF0391_10147 | 1498598 | 1499284 | -1 endopeptidase Clp                             |
| 1431249 | 1529242 | 97993 | EFH93780.1 | HMPREF0391_10148 | 1499271 | 1500548 | -1 phage portal protein, HK97 family             |
| 1431249 | 1529242 | 97993 | EFH93781.1 | HMPREF0391_10149 | 1500593 | 1501012 | -1 hypothetical protein                          |
| 1431249 | 1529242 | 97993 | EFH93782.1 | HMPREF0391_10150 | 1501057 | 1502646 | -1 putative phage terminase, large subunit       |
| 1431249 | 1529242 | 97993 | EFH93783.1 | HMPREF0391_10151 | 1502742 | 1503062 | -1 hypothetical protein                          |
| 1431249 | 1529242 | 97993 | EFH93784.1 | HMPREF0391_10152 | 1503123 | 1503518 | -1 hypothetical protein                          |
| 1431249 | 1529242 | 97993 | EFH93785.1 | HMPREF0391_10153 | 1503563 | 1503778 | -1 hypothetical protein                          |
| 1431249 | 1529242 | 97993 | EFH93786.1 | HMPREF0391_10154 | 1503822 | 1505072 | -1 DNA (cytosine-5-)-methyltransferase           |
| 1431249 | 1529242 | 97993 | EFH93787.1 | HMPREF0391_10155 | 1505072 | 1505854 | -1 hypothetical protein                          |
| 1431249 | 1529242 | 97993 | EFH93788.1 | HMPREF0391_10156 | 1505858 | 1506370 | -1 HNH endonuclease domain protein               |
| 1431249 | 1529242 | 97993 | EFH93789.1 | HMPREF0391_10157 | 1506380 | 1507027 | -1 hypothetical protein                          |
| 1431249 | 1529242 | 97993 | EFH93790.1 | HMPREF0391_10158 | 1507081 | 1507479 | -1 HNH endonuclease domain protein               |
| 1431249 | 1529242 | 97993 | EFH93791.1 | HMPREF0391_10159 | 1507626 | 1507883 | 1 transcriptional regulator, AbrB family         |
| 1431249 | 1529242 | 97993 | EFH93792.1 | HMPREF0391_10160 | 1507883 | 1508149 | 1 addiction module toxin, RelE/StbE family       |
| 1431249 | 1529242 | 97993 | EFH93793.1 | HMPREF0391_10161 | 1508226 | 1508627 | -1 hypothetical protein                          |
| 1431249 | 1529242 | 97993 | EFH93794.1 | HMPREF0391_10162 | 1508675 | 1510018 | -1 type III restriction enzyme, res subunit      |
| 1431249 | 1529242 | 97993 | EFH93795.1 | HMPREF0391_10163 | 1510019 | 1510216 | -1 VRR-NUC domain protein                        |
| 1431249 | 1529242 | 97993 | EFH93796.1 | HMPREF0391_10164 | 1510258 | 1510497 | -1 hypothetical protein                          |
| 1431249 | 1529242 | 97993 | EFH93797.1 | HMPREF0391_10165 | 1510779 | 1512980 | -1 protein                                       |
| 1431249 | 1529242 | 97993 | EFH93798.1 | HMPREF0391_10166 | 1512981 | 1513367 | -1 hypothetical protein                          |
| 1431249 | 1529242 | 97993 | EFH93799.1 | HMPREF0391_10167 | 1513360 | 1513602 | -1 hypothetical protein                          |
| 1431249 | 1529242 | 97993 | EFH93800.1 | HMPREF0391_10168 | 1513574 | 1515505 | -1 putative DNA-directed DNA polymerase          |
| 1431249 | 1529242 | 97993 | EFH93801.1 | HMPREF0391_10169 | 1515480 | 1515680 | -1 hypothetical protein                          |
| 1431249 | 1529242 | 97993 | EFH93802.1 | HMPREF0391_10170 | 1515690 | 1516232 | -1 hypothetical protein                          |
| 1431249 | 1529242 | 97993 | EFH93803.1 | HMPREF0391_10171 | 1516222 | 1517346 | -1 hypothetical protein                          |
| 1431249 | 1529242 | 97993 | EFH93804.1 | HMPREF0391_10172 | 1517346 | 1517621 | -1 hypothetical protein                          |
| 1431249 | 1529242 | 97993 | EFH93805.1 | HMPREF0391_10173 | 1517584 | 1517748 | -1 hypothetical protein                          |
| 1431249 | 1529242 | 97993 | EFH93806.1 | HMPREF0391_10174 | 1517739 | 1517909 | -1 hypothetical protein                          |
| 1431249 | 1529242 | 97993 | EFH93807.1 | HMPREF0391_10175 | 1517943 | 1518461 | -1 RNA polymerase sigma factor, sigma-70 family  |
| 1431249 | 1529242 | 97993 | EFH93808.1 | HMPREF0391_10176 | 1518796 | 1518960 | -1 hypothetical protein                          |
| 1431249 | 1529242 | 97993 | EFH93809.1 | HMPREF0391_10177 | 1519033 | 1519818 | -1 hypothetical protein                          |
| 1431249 | 1529242 | 97993 | EFH93810.1 | HMPREF0391_10178 | 1519821 | 1520192 | -1 DNA-binding helix-turn-helix protein          |
| 1431249 | 1529242 | 97993 | EFH93811.1 | HMPREF0391_10179 | 1520443 | 1521657 | -1 23S rRNA (uracil-5-)-methyltransferase RumA   |
| 1431249 | 1529242 | 97993 | EFH93812.1 | HMPREF0391_10180 | 1521740 | 1523536 | -1 ABC transporter, ATP-binding protein          |
| 1431249 | 1529242 | 97993 | EFH93813.1 | HMPREF0391_10181 | 1523529 | 1525289 | -1 ABC transporter, ATP-binding protein          |
| 1431249 | 1529242 | 97993 | EFH93814.1 | HMPREF0391_10182 | 1525264 | 1525740 | -1 transcriptional regulator, MarR family        |
| 1431249 | 1529242 | 97993 | EFH93815.1 | HMPREF0391_10183 | 1525745 | 1525873 | -1 hypothetical protein                          |
| 1431249 | 1529242 | 97993 | EFH93816.1 | HMPREF0391_10184 | 1525897 | 1527198 | -1 thiamine biosynthesis protein ThiC            |
| 1431249 | 1529242 | 97993 | EFH93817.1 | HMPREF0391_10185 | 1527379 | 1528293 | -1 molybdenum cofactor biosynthesis protein C    |
| 1431249 | 1529242 | 97993 | EFH93818.1 | HMPREF0391_10186 | 1528295 | 1529242 | -1 molybdenum cofactor biosynthesis protein A    |
| 1453710 | 1469475 | 15765 | EFH93730.1 | HMPREF0391_10098 | 1453710 | 1455173 | -1 ABC transporter, ATP-binding protein          |
| 1453710 | 1469475 | 15765 | EFH93731.1 | HMPREF0391_10099 | 1455175 | 1455846 | -1 cobalt transport protein                      |
| 1453710 | 1469475 | 15765 | EFH93732.1 | HMPREF0391_10100 | 1455843 | 1456433 | -1 conserved hypothetical protein TIGR02185      |
| 1453710 | 1469475 | 15765 | EFH93733.1 | HMPREF0391_10101 | 1456500 | 1457477 | -1 transcriptional regulator, AraC family        |
| 1453710 | 1469475 | 15765 | EFH93734.1 | HMPREF0391_10102 | 1457487 | 1458089 | -1 transcriptional regulator, TetR family        |
| 1453710 | 1469475 | 15765 | EFH93735.1 | HMPREF0391_10103 | 1458205 | 1458381 | -1 hypothetical protein                          |
| 1453710 | 1469475 | 15765 | EFH93736.1 | HMPREF0391_10104 | 1458528 | 1458791 | 1 hypothetical protein                           |
| 1453710 | 1469475 | 15765 | EFH93737.1 | HMPREF0391_10105 | 1459309 | 1459572 | -1 hypothetical protein                          |
| 1453710 | 1469475 | 15765 | EFH93738.1 | HMPREF0391_10106 | 1459749 | 1460726 | -1 caspase domain protein                        |
| 1453710 | 1469475 | 15765 | EFH93739.1 | HMPREF0391_10107 | 1460746 | 1461123 | -1 hypothetical protein                          |
| 1453710 | 1469475 | 15765 | EFH93740.1 | HMPREF0391_10108 | 1461126 | 1461293 | -1 hypothetical protein                          |
| 1453710 | 1469475 | 15765 | EFH93741.1 | HMPREF0391_10109 | 1461517 | 1461984 | -1 hypothetical protein                          |
| 1453710 | 1469475 | 15765 | EFH93742.1 | HMPREF0391_10110 | 1462046 | 1462837 | -1 CAAX amino terminal protease family protein   |
| 1453710 | 1469475 | 15765 | EFH93743.1 | HMPREF0391_10111 | 1463678 | 1464328 | -1 hypothetical protein                          |
| 1453710 | 1469475 | 15765 | EFH93744.1 | HMPREF0391_10112 | 1464635 | 1465384 | -1 hypothetical protein                          |
| 1453710 | 1469475 | 15765 | EFH93745.1 | HMPREF0391_10113 | 1465957 | 1467390 | -1 hypothetical protein                          |
| 1453710 | 1469475 | 15765 | EFH93746.1 | HMPREF0391_10114 | 1467431 | 1467751 | -1 hypothetical protein                          |

|         |         |                  |                  |         |         |                                         |
|---------|---------|------------------|------------------|---------|---------|-----------------------------------------|
| 1453710 | 1469475 | 15765 EFH93747.1 | HMPREF0391_10115 | 1467931 | 1468203 | -1 hypothetical protein                 |
| 1453710 | 1469475 | 15765 EFH93748.1 | HMPREF0391_10116 | 1468489 | 1469475 | 1 integrase core domain protein         |
| 1570342 | 1579874 | 9532 EFH93858.1  | HMPREF0391_10226 | 1570342 | 1571268 | 1 hypothetical protein                  |
| 1570342 | 1579874 | 9532 EFH93859.1  | HMPREF0391_10227 | 1571298 | 1571957 | 1 hypothetical protein                  |
| 1570342 | 1579874 | 9532 EFH93860.1  | HMPREF0391_10228 | 1572230 | 1572361 | 1 hypothetical protein                  |
| 1570342 | 1579874 | 9532 EFH93861.1  | HMPREF0391_10229 | 1572354 | 1573454 | 1 transposase                           |
| 1570342 | 1579874 | 9532 EFH93862.1  | HMPREF0391_10230 | 1573710 | 1573952 | 1 prevent-host-death family protein     |
| 1570342 | 1579874 | 9532 EFH93863.1  | HMPREF0391_10231 | 1574033 | 1575247 | 1 transposase, Mutator family           |
| 1570342 | 1579874 | 9532 EFH93864.1  | HMPREF0391_10232 | 1576090 | 1576665 | -1 Fic family protein                   |
| 1570342 | 1579874 | 9532 EFH93865.1  | HMPREF0391_10233 | 1577843 | 1578577 | -1 hydrolase, carbon-nitrogen family    |
| 1570342 | 1579874 | 9532 EFH93866.1  | HMPREF0391_10234 | 1578577 | 1579080 | -1 hypothetical protein                 |
| 1570342 | 1579874 | 9532 EFH93867.1  | HMPREF0391_10235 | 1579233 | 1579874 | 1 channel protein, hemolysin III family |
| 1806496 | 1818737 | 12241 EFH94054.1 | HMPREF0391_10422 | 1806496 | 1806795 | -1 hypothetical protein                 |
| 1806496 | 1818737 | 12241 EFH94055.1 | HMPREF0391_10423 | 1807324 | 1807638 | 1 hypothetical protein                  |
| 1806496 | 1818737 | 12241 EFH94056.1 | HMPREF0391_10424 | 1807654 | 1808040 | 1 hypothetical protein                  |
| 1806496 | 1818737 | 12241 EFH94057.1 | HMPREF0391_10425 | 1808069 | 1809454 | 1 FtsK/SpoIIIE family protein           |
| 1806496 | 1818737 | 12241 EFH94058.1 | HMPREF0391_10426 | 1809457 | 1809609 | 1 hypothetical protein                  |
| 1806496 | 1818737 | 12241 EFH94059.1 | HMPREF0391_10427 | 1809632 | 1810837 | 1 DNA-binding helix-turn-helix protein  |
| 1806496 | 1818737 | 12241 EFH94060.1 | HMPREF0391_10428 | 1810880 | 1811101 | 1 hypothetical protein                  |
| 1806496 | 1818737 | 12241 EFH94061.1 | HMPREF0391_10429 | 1811218 | 1811715 | 1 antirestriction protein ArdA          |
| 1806496 | 1818737 | 12241 EFH94062.1 | HMPREF0391_10430 | 1811690 | 1812196 | 1 hypothetical protein                  |
| 1806496 | 1818737 | 12241 EFH94063.1 | HMPREF0391_10431 | 1812180 | 1814627 | 1 hypothetical protein                  |
| 1806496 | 1818737 | 12241 EFH94064.1 | HMPREF0391_10432 | 1814630 | 1816807 | 1 hypothetical protein                  |
| 1806496 | 1818737 | 12241 EFH94065.1 | HMPREF0391_10433 | 1816804 | 1817805 | 1 NlpC/P60 family protein               |
| 1806496 | 1818737 | 12241 EFH94066.1 | HMPREF0391_10434 | 1817802 | 1818737 | 1 hypothetical protein                  |
| 1888259 | 1904566 | 16307 EFH94139.1 | HMPREF0391_10507 | 1888259 | 1888393 | -1 hypothetical protein                 |
| 1888259 | 1904566 | 16307 EFH94140.1 | HMPREF0391_10508 | 1889426 | 1889770 | -1 hypothetical protein                 |
| 1888259 | 1904566 | 16307 EFH94141.1 | HMPREF0391_10509 | 1889757 | 1891727 | -1 oligopeptide transporter, OPT family |
| 1888259 | 1904566 | 16307 EFH94142.1 | HMPREF0391_10510 | 1891902 | 1892507 | 1 hypothetical protein                  |
| 1888259 | 1904566 | 16307 EFH94143.1 | HMPREF0391_10511 | 1892871 | 1893791 | -1 transposase, Mutator family          |
| 1888259 | 1904566 | 16307 EFH94144.1 | HMPREF0391_10512 | 1893839 | 1894084 | -1 hypothetical protein                 |
| 1888259 | 1904566 | 16307 EFH94145.1 | HMPREF0391_10513 | 1894683 | 1895966 | -1 hypothetical protein                 |
| 1888259 | 1904566 | 16307 EFH94146.1 | HMPREF0391_10514 | 1895969 | 1897267 | -1 hypothetical protein                 |
| 1888259 | 1904566 | 16307 EFH94147.1 | HMPREF0391_10515 | 1897280 | 1898029 | -1 hypothetical protein                 |
| 1888259 | 1904566 | 16307 EFH94148.1 | HMPREF0391_10516 | 1898022 | 1898333 | -1 hypothetical protein                 |
| 1888259 | 1904566 | 16307 EFH94149.1 | HMPREF0391_10517 | 1898350 | 1900155 | -1 hypothetical protein                 |
| 1888259 | 1904566 | 16307 EFH94150.1 | HMPREF0391_10518 | 1900143 | 1900892 | -1 hypothetical protein                 |
| 1888259 | 1904566 | 16307 EFH94151.1 | HMPREF0391_10519 | 1900918 | 1902234 | -1 hypothetical protein                 |
| 1888259 | 1904566 | 16307 EFH94152.1 | HMPREF0391_10520 | 1902530 | 1904566 | 1 hypothetical protein                  |
| 1892871 | 1900892 | 8021 EFH94143.1  | HMPREF0391_10511 | 1892871 | 1893791 | -1 transposase, Mutator family          |
| 1892871 | 1900892 | 8021 EFH94144.1  | HMPREF0391_10512 | 1893839 | 1894084 | -1 hypothetical protein                 |
| 1892871 | 1900892 | 8021 EFH94145.1  | HMPREF0391_10513 | 1894683 | 1895966 | -1 hypothetical protein                 |
| 1892871 | 1900892 | 8021 EFH94146.1  | HMPREF0391_10514 | 1895969 | 1897267 | -1 hypothetical protein                 |
| 1892871 | 1900892 | 8021 EFH94147.1  | HMPREF0391_10515 | 1897280 | 1898029 | -1 hypothetical protein                 |
| 1892871 | 1900892 | 8021 EFH94148.1  | HMPREF0391_10516 | 1898022 | 1898333 | -1 hypothetical protein                 |
| 1892871 | 1900892 | 8021 EFH94149.1  | HMPREF0391_10517 | 1898350 | 1900155 | -1 hypothetical protein                 |
| 1892871 | 1900892 | 8021 EFH94150.1  | HMPREF0391_10518 | 1900143 | 1900892 | -1 hypothetical protein                 |
| 1904633 | 1910011 | 5378 EFH94153.1  | HMPREF0391_10521 | 1904633 | 1906318 | 1 hypothetical protein                  |
| 1904633 | 1910011 | 5378 EFH94154.1  | HMPREF0391_10522 | 1906315 | 1907400 | 1 hypothetical protein                  |
| 1904633 | 1910011 | 5378 EFH94155.1  | HMPREF0391_10523 | 1907437 | 1908018 | 1 hypothetical protein                  |
| 1904633 | 1910011 | 5378 EFH94156.1  | HMPREF0391_10524 | 1909789 | 1910011 | -1 hypothetical protein                 |



**Table S3L: Predicted genomic islands in the genome of *F. magna* ATCC29328**

Shown are genes of genomic islands predicted by IslandViewer4

| Island start | Island end | Length | Gene name      | Locus       | Gene start | Gene end | Strand | Product                                                                                                          |
|--------------|------------|--------|----------------|-------------|------------|----------|--------|------------------------------------------------------------------------------------------------------------------|
| 777457       | 788164     | 10707  | WP_002838404.1 | FMG_RS03870 | 777457     | 778155   | 1      | DNA-binding response regulator                                                                                   |
| 777457       | 788164     | 10707  | WP_012290581.1 | FMG_RS03875 | 778196     | 778780   | 1      | peptidyl-prolyl cis-trans isomerase                                                                              |
| 777457       | 788164     | 10707  | WP_012290582.1 | FMG_RS03880 | 778782     | 779414   | 1      | thymidine kinase                                                                                                 |
| 777457       | 788164     | 10707  | WP_002841719.1 | FMG_RS03885 | 779436     | 779906   | -1     | S-ribosylhomocysteine lyase                                                                                      |
| 777457       | 788164     | 10707  | WP_012290583.1 | FMG_RS03890 | 779915     | 781018   | -1     | rod shape-determining protein RodA                                                                               |
| 777457       | 788164     | 10707  | WP_002841740.1 | FMG_RS03895 | 781093     | 781926   | 1      | endonuclease                                                                                                     |
| 777457       | 788164     | 10707  | WP_002838210.1 | FMG_RS03900 | 781907     | 782533   | 1      | endonuclease III                                                                                                 |
| 777457       | 788164     | 10707  | WP_002841720.1 | FMG_RS03905 | 782601     | 783521   | 1      | aspartate carbamoyltransferase<br>aspartate carbamoyltransferase regulatory                                      |
| 777457       | 788164     | 10707  | WP_012290584.1 | FMG_RS03910 | 783521     | 783949   | 1      | subunit                                                                                                          |
| 777457       | 788164     | 10707  | WP_012290585.1 | FMG_RS03915 | 783949     | 785145   | 1      | dihydroorotase                                                                                                   |
| 777457       | 788164     | 10707  | WP_012290586.1 | FMG_RS03920 | 785132     | 785983   | 1      | orotidine 5'-phosphate decarboxylase<br>dihydroorotate dehydrogenase electron transfer                           |
| 777457       | 788164     | 10707  | WP_012290587.1 | FMG_RS03925 | 785976     | 786692   | 1      | subunit                                                                                                          |
| 777457       | 788164     | 10707  | WP_012290588.1 | FMG_RS03930 | 786685     | 787581   | 1      | dihydroorotate dehydrogenase                                                                                     |
| 777457       | 788164     | 10707  | WP_012290589.1 | FMG_RS03935 | 787592     | 788164   | 1      | orotate phosphoribosyltransferase                                                                                |
| 800334       | 806465     | 6131   | WP_012290598.1 | FMG_RS03995 | 800334     | 802022   | 1      | hypothetical protein<br>bifunctional ([pyruvate, phosphate dikinase]<br>phosphate) phosphotransferase/[pyruvate, |
| 800334       | 806465     | 6131   | WP_002838113.1 | FMG_RS04000 | 802033     | 802830   | 1      | phosphate diki                                                                                                   |
| 800334       | 806465     | 6131   | WP_012290599.1 | FMG_RS04005 | 802914     | 804347   | 1      | serine/threonine protein kinase                                                                                  |
| 800334       | 806465     | 6131   | WP_012290600.1 | FMG_RS04010 | 804349     | 805023   | 1      | protein phosphatase<br>tRNA (N6-isopentenyl adenosine(37)-C2)-                                                   |
| 800334       | 806465     | 6131   | WP_002838381.1 | FMG_RS04015 | 805080     | 806465   | 1      | methylthiotransferase MiaB                                                                                       |
| 991864       | 1059050    | 67186  | WP_012290711.1 | FMG_RS04885 | 991864     | 993141   | -1     | ABC transporter permease                                                                                         |
| 991864       | 1059050    | 67186  | WP_012290712.1 | FMG_RS04890 | 993339     | 993626   | -1     | cupin                                                                                                            |
| 991864       | 1059050    | 67186  | WP_012290713.1 | FMG_RS04895 | 993694     | 994266   | -1     | uracil-DNA glycosylase                                                                                           |
| 991864       | 1059050    | 67186  | WP_012290714.1 | FMG_RS04900 | 994598     | 994882   | -1     | hypothetical protein                                                                                             |
| 991864       | 1059050    | 67186  |                | FMG_RS04905 | 994940     | 995686   | -1     | ABC transporter                                                                                                  |
| 991864       | 1059050    | 67186  |                | FMG_RS04910 | 995673     | 996392   | -1     | iron ABC transporter permease                                                                                    |
| 991864       | 1059050    | 67186  | WP_002840481.1 | FMG_RS04915 | 996452     | 997210   | -1     | methyltransferase                                                                                                |
| 991864       | 1059050    | 67186  | WP_002837989.1 | FMG_RS04920 | 997305     | 997898   | 1      | hypothetical protein                                                                                             |
| 991864       | 1059050    | 67186  | WP_012290720.1 | FMG_RS04925 | 998668     | 998937   | 1      | transposase                                                                                                      |
| 991864       | 1059050    | 67186  | WP_041250650.1 | FMG_RS04930 | 999050     | 999847   | 1      | transposase                                                                                                      |
| 991864       | 1059050    | 67186  | WP_002840495.1 | FMG_RS04935 | 1000078    | 1001280  | -1     | ABC transporter substrate-binding protein                                                                        |
| 991864       | 1059050    | 67186  | WP_012290722.1 | FMG_RS04940 | 1001280    | 1001819  | -1     | FMN-binding domain-containing protein                                                                            |
| 991864       | 1059050    | 67186  | WP_012290723.1 | FMG_RS04945 | 1001925    | 1002371  | -1     | hypothetical protein                                                                                             |
| 991864       | 1059050    | 67186  | WP_012290724.1 | FMG_RS04950 | 1002528    | 1003763  | -1     | site-specific integrase                                                                                          |
| 991864       | 1059050    | 67186  | WP_009345237.1 | FMG_RS04955 | 1003841    | 1004050  | -1     | transposase                                                                                                      |
| 991864       | 1059050    | 67186  | WP_009345230.1 | FMG_RS04960 | 1004486    | 1004896  | -1     | sigma factor                                                                                                     |
| 991864       | 1059050    | 67186  | WP_041250601.1 | FMG_RS04965 | 1005216    | 1006565  | -1     | multidrug transporter MatE                                                                                       |
| 991864       | 1059050    | 67186  | WP_012290726.1 | FMG_RS04970 | 1006602    | 1008335  | -1     | multidrug ABC transporter ATP-binding protein                                                                    |
| 991864       | 1059050    | 67186  | WP_012290727.1 | FMG_RS04975 | 1008332    | 1010074  | -1     | ABC transporter ATP-binding protein                                                                              |
| 991864       | 1059050    | 67186  | WP_012290728.1 | FMG_RS04980 | 1010110    | 1011501  | -1     | ABC transporter ATP-binding protein                                                                              |
| 991864       | 1059050    | 67186  | WP_012290729.1 | FMG_RS04985 | 1011494    | 1012195  | -1     | ABC transporter permease                                                                                         |
| 991864       | 1059050    | 67186  | WP_002836642.1 | FMG_RS04990 | 1012220    | 1012801  | -1     | membrane protein                                                                                                 |
| 991864       | 1059050    | 67186  | WP_012290730.1 | FMG_RS04995 | 1012819    | 1013412  | -1     | TetR family transcriptional regulator                                                                            |
| 991864       | 1059050    | 67186  | WP_012290731.1 | FMG_RS05000 | 1013743    | 1014099  | 1      | conjugal transfer protein                                                                                        |
| 991864       | 1059050    | 67186  | WP_041250602.1 | FMG_RS05005 | 1014101    | 1015432  | 1      | endonuclease                                                                                                     |
| 991864       | 1059050    | 67186  | WP_012290734.1 | FMG_RS05010 | 1015796    | 1018231  | -1     | ABC transporter permease                                                                                         |
| 991864       | 1059050    | 67186  | WP_012290735.1 | FMG_RS05015 | 1018224    | 1018904  | -1     | peptide ABC transporter ATP-binding protein                                                                      |
| 991864       | 1059050    | 67186  | WP_012290736.1 | FMG_RS05020 | 1018957    | 1019817  | -1     | two-component sensor histidine kinase                                                                            |
| 991864       | 1059050    | 67186  | WP_012290737.1 | FMG_RS05025 | 1019819    | 1020469  | -1     | DNA-binding response regulator                                                                                   |
| 991864       | 1059050    | 67186  | WP_012290738.1 | FMG_RS05030 | 1020651    | 1021754  | -1     | ATP-dependent DNA helicase                                                                                       |
| 991864       | 1059050    | 67186  | WP_012290739.1 | FMG_RS05035 | 1021744    | 1023372  | -1     | DNA recombinase                                                                                                  |
| 991864       | 1059050    | 67186  | WP_012290740.1 | FMG_RS05040 | 1023395    | 1023601  | -1     | transcriptional regulator                                                                                        |
| 991864       | 1059050    | 67186  | WP_012290741.1 | FMG_RS05045 | 1023780    | 1024436  | -1     | hypothetical protein                                                                                             |
| 991864       | 1059050    | 67186  | WP_012290742.1 | FMG_RS05050 | 1024480    | 1032123  | -1     | DNA helicase                                                                                                     |
| 991864       | 1059050    | 67186  | WP_002836656.1 | FMG_RS05055 | 1032206    | 1034419  | -1     | hypothetical protein                                                                                             |
| 991864       | 1059050    | 67186  | WP_002836657.1 | FMG_RS05060 | 1034455    | 1035417  | -1     | type II restriction endonuclease subunit M                                                                       |
| 991864       | 1059050    | 67186  | WP_012290743.1 | FMG_RS05065 | 1035410    | 1037131  | -1     | DNA topoisomerase III                                                                                            |
| 991864       | 1059050    | 67186  | WP_002836659.1 | FMG_RS05070 | 1037195    | 1038061  | -1     | bacteriocin                                                                                                      |
| 991864       | 1059050    | 67186  | WP_004817210.1 | FMG_RS05075 | 1038076    | 1040427  | -1     | copper amine oxidase                                                                                             |
| 991864       | 1059050    | 67186  | WP_001080402.1 | FMG_RS05080 | 1040414    | 1040653  | -1     | hypothetical protein                                                                                             |
| 991864       | 1059050    | 67186  | WP_012290744.1 | FMG_RS05085 | 1040668    | 1043247  | -1     | hypothetical protein                                                                                             |
| 991864       | 1059050    | 67186  | WP_041250652.1 | FMG_RS05090 | 1043255    | 1045498  | -1     | conjugal transfer protein TraE                                                                                   |
| 991864       | 1059050    | 67186  | WP_008902108.1 | FMG_RS05095 | 1045569    | 1045979  | -1     | transposase                                                                                                      |
| 991864       | 1059050    | 67186  | WP_002838520.1 | FMG_RS05100 | 1045981    | 1046271  | -1     | hypothetical protein                                                                                             |
| 991864       | 1059050    | 67186  | WP_000466919.1 | FMG_RS05105 | 1046281    | 1047144  | -1     | hypothetical protein                                                                                             |
| 991864       | 1059050    | 67186  | WP_000394203.1 | FMG_RS05110 | 1047155    | 1047370  | -1     | conjugal transfer protein                                                                                        |
| 991864       | 1059050    | 67186  | WP_002839977.1 | FMG_RS05115 | 1047372    | 1047683  | -1     | hypothetical protein                                                                                             |
| 991864       | 1059050    | 67186  | WP_001105422.1 | FMG_RS05120 | 1047879    | 1049348  | -1     | hypothetical protein                                                                                             |
| 991864       | 1059050    | 67186  | WP_001258251.1 | FMG_RS05125 | 1049366    | 1049902  | -1     | hypothetical protein                                                                                             |
| 991864       | 1059050    | 67186  | WP_002839985.1 | FMG_RS05130 | 1049964    | 1050683  | -1     | conjugal transfer protein TraG                                                                                   |
| 991864       | 1059050    | 67186  | WP_002838479.1 | FMG_RS05135 | 1050785    | 1050970  | -1     | transposase                                                                                                      |
| 991864       | 1059050    | 67186  | WP_002838522.1 | FMG_RS05140 | 1051072    | 1052061  | -1     | hypothetical protein                                                                                             |
| 991864       | 1059050    | 67186  | WP_012290746.1 | FMG_RS05145 | 1052135    | 1052458  | -1     | hypothetical protein                                                                                             |
| 991864       | 1059050    | 67186  | WP_012290747.1 | FMG_RS05150 | 1052641    | 1053354  | -1     | hypothetical protein                                                                                             |
| 991864       | 1059050    | 67186  | WP_012290748.1 | FMG_RS05155 | 1053436    | 1055076  | -1     | nickase                                                                                                          |
| 991864       | 1059050    | 67186  | WP_012290749.1 | FMG_RS05160 | 1055391    | 1055765  | -1     | hypothetical protein                                                                                             |
| 991864       | 1059050    | 67186  | WP_002416386.1 | FMG_RS05165 | 1055852    | 1056268  | -1     | hypothetical protein                                                                                             |
| 991864       | 1059050    | 67186  | WP_002416388.1 | FMG_RS05170 | 1056555    | 1056788  | -1     | hypothetical protein                                                                                             |
| 991864       | 1059050    | 67186  | WP_012290750.1 | FMG_RS05175 | 1056801    | 1058822  | -1     | ferrous iron transporter B                                                                                       |
| 991864       | 1059050    | 67186  | WP_012290751.1 | FMG_RS05180 | 1058826    | 1059050  | -1     | iron transporter FeoA                                                                                            |

|         |         |                      |             |         |         |                                                  |
|---------|---------|----------------------|-------------|---------|---------|--------------------------------------------------|
| 991864  | 1059050 | 67186 WP_012290752.1 | FMG_RS05185 | 1059037 | 1060785 | -1 multidrug ABC transporter                     |
| 994598  | 1001280 | 6682 WP_012290714.1  | FMG_RS04900 | 994598  | 994882  | -1 hypothetical protein                          |
| 994598  | 1001280 | 6682                 | FMG_RS04905 | 994940  | 995686  | -1 ABC transporter                               |
| 994598  | 1001280 | 6682                 | FMG_RS04910 | 995673  | 996392  | -1 iron ABC transporter permease                 |
| 994598  | 1001280 | 6682 WP_002840481.1  | FMG_RS04915 | 996452  | 997210  | -1 methyltransferase                             |
| 994598  | 1001280 | 6682 WP_002837989.1  | FMG_RS04920 | 997305  | 997898  | 1 hypothetical protein                           |
| 994598  | 1001280 | 6682 WP_012290720.1  | FMG_RS04925 | 998668  | 998937  | 1 transposase                                    |
| 994598  | 1001280 | 6682 WP_041250650.1  | FMG_RS04930 | 999050  | 999847  | 1 transposase                                    |
| 994598  | 1001280 | 6682 WP_002840495.1  | FMG_RS04935 | 1000078 | 1001280 | -1 ABC transporter substrate-binding protein     |
| 1018957 | 1024436 | 5479 WP_012290736.1  | FMG_RS05020 | 1018957 | 1019817 | -1 two-component sensor histidine kinase         |
| 1018957 | 1024436 | 5479 WP_012290737.1  | FMG_RS05025 | 1019819 | 1020469 | -1 DNA-binding response regulator                |
| 1018957 | 1024436 | 5479 WP_012290738.1  | FMG_RS05030 | 1020651 | 1021754 | -1 ATP-dependent DNA helicase                    |
| 1018957 | 1024436 | 5479 WP_012290739.1  | FMG_RS05035 | 1021744 | 1023372 | -1 DNA recombinase                               |
| 1018957 | 1024436 | 5479 WP_012290740.1  | FMG_RS05040 | 1023395 | 1023601 | -1 transcriptional regulator                     |
| 1018957 | 1024436 | 5479 WP_012290741.1  | FMG_RS05045 | 1023780 | 1024436 | -1 hypothetical protein                          |
| 1538370 | 1546110 | 7740 WP_012291054.1  | FMG_RS07340 | 1538370 | 1539119 | -1 phosphorylase                                 |
| 1538370 | 1546110 | 7740 WP_012291055.1  | FMG_RS07345 | 1539249 | 1540850 | -1 macrolide ABC transporter ATP-binding protein |
| 1538370 | 1546110 | 7740 WP_012291056.1  | FMG_RS07350 | 1541255 | 1541869 | -1 hypothetical protein                          |
| 1538370 | 1546110 | 7740 WP_012291057.1  | FMG_RS07355 | 1542076 | 1543440 | -1 ABC transporter ATP-binding protein           |
| 1538370 | 1546110 | 7740 WP_012291058.1  | FMG_RS07360 | 1543428 | 1544123 | -1 cobalt ABC transporter permease               |
| 1538370 | 1546110 | 7740 WP_012291059.1  | FMG_RS07365 | 1544123 | 1544707 | -1 membrane protein                              |
| 1538370 | 1546110 | 7740 WP_041250667.1  | FMG_RS07370 | 1544767 | 1546110 | -1 MATE family efflux transporter                |
| 1553812 | 1571194 | 17382 WP_002836976.1 | FMG_RS07405 | 1553812 | 1554507 | 1 DNA-binding response regulator                 |
| 1553812 | 1571194 | 17382 WP_012291067.1 | FMG_RS07410 | 1554509 | 1555804 | 1 two-component sensor histidine kinase          |
| 1553812 | 1571194 | 17382 WP_041250623.1 | FMG_RS07415 | 1556528 | 1556734 | -1 hypothetical protein                          |
| 1553812 | 1571194 | 17382 WP_041250624.1 | FMG_RS07420 | 1557057 | 1557284 | -1 hypothetical protein                          |
| 1553812 | 1571194 | 17382 WP_012291068.1 | FMG_RS07425 | 1557281 | 1559017 | -1 multidrug ABC transporter ATP-binding protein |
| 1553812 | 1571194 | 17382 WP_012291069.1 | FMG_RS07430 | 1559010 | 1560731 | -1 ABC transporter ATP-binding protein           |
| 1553812 | 1571194 | 17382 WP_012291070.1 | FMG_RS07435 | 1560769 | 1562121 | -1 MATE family efflux transporter                |
| 1553812 | 1571194 | 17382 WP_012291071.1 | FMG_RS07440 | 1562134 | 1563582 | -1 ABC transporter                               |
| 1553812 | 1571194 | 17382 WP_012291072.1 | FMG_RS07445 | 1563579 | 1564259 | -1 ABC transporter permease                      |
| 1553812 | 1571194 | 17382 WP_005956598.1 | FMG_RS07450 | 1564259 | 1564837 | -1 hypothetical protein                          |
| 1553812 | 1571194 | 17382 WP_041250625.1 | FMG_RS07455 | 1564889 | 1565461 | -1 TetR family transcriptional regulator         |
| 1553812 | 1571194 | 17382 WP_012291075.1 | FMG_RS07460 | 1565754 | 1566110 | 1 conjugal transfer protein                      |
| 1553812 | 1571194 | 17382 WP_004838629.1 | FMG_RS07470 | 1566622 | 1568316 | -1 hypothetical protein                          |
| 1553812 | 1571194 | 17382 WP_041250668.1 | FMG_RS07475 | 1568316 | 1569320 | -1 hypothetical protein                          |
| 1553812 | 1571194 | 17382                | FMG_RS07480 | 1569768 | 1570610 | -1 abortive phage infection protein              |
| 1553812 | 1571194 | 17382 WP_012291079.1 | FMG_RS07485 | 1570607 | 1571194 | -1 transcriptional regulator                     |

**Table S4A: Blast results showing protein L homologs in 12 *Fingoldia* genomes.**

As query, protein L from strain 312 (locus ID: M86697) was taken. As Blast cutoff: e-value &lt; e-10

| Species             | strain    | gene  | Prokka annotation                                    | score | e-value |
|---------------------|-----------|-------|------------------------------------------------------|-------|---------|
| <i>"F. nericia"</i> | ATCC53516 | 12510 | Peptostreptococcal albumin-binding protein precursor | 1099  | 0.0     |
| <i>"F. nericia"</i> | T160124   | 15430 | Peptostreptococcal albumin-binding protein precursor | 357   | e-112   |
| <i>"F. nericia"</i> | CCUG54800 | 17560 | Peptostreptococcal albumin-binding protein precursor | 334   | e-104   |
| <i>"F. nericia"</i> | 12T273    | 18110 | Peptostreptococcal albumin-binding protein precursor | 286   | 7e-85   |
| <i>"F. nericia"</i> | 12T306    | 16410 | Peptostreptococcal albumin-binding protein precursor | 218   | 3e-59   |
| <i>"F. nericia"</i> | CCUG54800 | 10280 | IgA FC receptor precursor                            | 90    | 1e-18   |
| <i>"F. nericia"</i> | 12T272    | 07960 | IgA FC receptor precursor                            | 89    | 3e-18   |
| <i>"F. nericia"</i> | T160124   | 15840 | Surface protein G precursor                          | 71    | 1e-12   |
| <i>F. magna</i>     | 08T492    | 16540 | Peptostreptococcal albumin-binding protein precursor | 69    | 1e-12   |
| <i>F. magna</i>     | 07T609    | 13520 | Extracellular matrix-binding protein ebh precursor   | 68    | 1e-11   |
| <i>"F. nericia"</i> | 12T273    | 17160 | Platelet binding protein GspB precursor              | 65    | 5e-11   |
| <i>"F. nericia"</i> | CCUG54800 | 15040 | Rib/alpha-like repeat protein                        | 65    | 5e-11   |

**Table S4B: Blast results showing peptostreptococcal albumin-binding protein (PAB) homologs in 12 *Fingoldia* genomes.** As query, the PAB protein of strain ALB8 (locus ID: X77864) was taken. As Blast cutoff: e-value < e-10.

| Species             | strain    | gene  | Prokka annotation                                    | score | e-value |
|---------------------|-----------|-------|------------------------------------------------------|-------|---------|
| <i>F. magna</i>     | 08T492    | 16540 | Peptostreptococcal albumin-binding protein precursor | 149   | 1e-40   |
| <i>F. magna</i>     | 07T609    | 15520 | Peptostreptococcal albumin-binding protein precursor | 140   | 1e-38   |
| <i>"F. nericia"</i> | 12T306    | 16410 | Peptostreptococcal albumin-binding protein precursor | 123   | 4e-30   |
| <i>"F. nericia"</i> | T160124   | 15430 | Peptostreptococcal albumin-binding protein precursor | 99    | 8e-23   |
| <i>"F. nericia"</i> | CCUG54800 | 17560 | Peptostreptococcal albumin-binding protein precursor | 99    | 1e-22   |
| <i>"F. nericia"</i> | 12T273    | 18110 | Peptostreptococcal albumin-binding protein precursor | 65    | 1e-11   |
| <i>"F. nericia"</i> | CCUG54800 | 17400 | Internalin-A precursor                               | 64    | 6e-11   |



**Table S4C: Blast results showing GA-module containing proteins in 12 *Fingoldia* genomes.** As query, the GA module of the PAB protein of strain ALB8 (locus ID: X77864) was taken. As Blast cutoff: e-value < e-10.

| Species               | strain    | gene  | Prokka annotation                                    | score | e-value |
|-----------------------|-----------|-------|------------------------------------------------------|-------|---------|
| <i>F. magna</i>       | 07T609    | 15520 | Peptostreptococcal albumin-binding protein precursor | 78    | 9e-20   |
| <i>F. magna</i>       | 08T492    | 16540 | Peptostreptococcal albumin-binding protein precursor | 78    | 5e-19   |
| " <i>F. nericia</i> " | T160124   | 15430 | Peptostreptococcal albumin-binding protein precursor | 77    | 2e-18   |
| " <i>F. nericia</i> " | CCUG54800 | 17560 | Peptostreptococcal albumin-binding protein precursor | 74    | 4e-17   |
| " <i>F. nericia</i> " | 12T306    | 16410 | Peptostreptococcal albumin-binding protein precursor | 74    | 5e-17   |
| " <i>F. nericia</i> " | CCUG54800 | 17400 | Internalin-A precursor                               | 60    | 3e-12   |
| " <i>F. nericia</i> " | 12T273    | 18110 | Peptostreptococcal albumin-binding protein precursor | 59    | 6e-12   |
| " <i>F. nericia</i> " | 12T306    | 16250 | Internalin-A precursor                               | 58    | 1e-11   |
| " <i>F. nericia</i> " | 09T494    | 18050 | N-acetylmuramoyl-L-alanine amidase LytC              | 58    | 2e-11   |
| " <i>F. nericia</i> " | 12T273    | 04210 | N-acetylmuramoyl-L-alanine amidase LytC              | 58    | 2e-11   |
| <i>F. magna</i>       | 07T609    | 15360 | Internalin-A precursor                               | 58    | 2e-11   |
| " <i>F. nericia</i> " | ATCC53516 | 09600 | N-acetylmuramoyl-L-alanine amidase LytC              | 58    | 2e-11   |
| " <i>F. nericia</i> " | T160124   | 15270 | Internalin-A precursor                               | 57    | 2e-11   |
| <i>F. magna</i>       | 08T492    | 16380 | N-acetylmuramoyl-L-alanine amidase LytC              | 57    | 3e-11   |
| " <i>F. nericia</i> " | 12T272    | 15560 | N-acetylmuramoyl-L-alanine amidase LytC              | 56    | 6e-11   |
| <i>F. magna</i>       | ATCC29328 | 15850 | N-acetylmuramoyl-L-alanine amidase LytC              | 56    | 8e-11   |

**Table S4D: Blast results showing SufA homologs in 12 *Fingoldia* genomes.** As query, SufA of strain ALB8 (locus ID: DQ679960) was taken. As Blast cutoff: e-value < e-10.

| Species               | strain    | gene  | Prokka annotation              | score | e-value |
|-----------------------|-----------|-------|--------------------------------|-------|---------|
| <i>F. magna</i>       | 08T492    | 17920 | Pll-type proteinase precursor  | 1971  | 0.0     |
| " <i>F. nericia</i> " | 12T273    | 01050 | Plll-type proteinase precursor | 1865  | 0.0     |
| " <i>F. nericia</i> " | T160124   | 16880 | Plll-type proteinase precursor | 1827  | 0.0     |
| " <i>F. nericia</i> " | ATCC53516 | 10860 | Pll-type proteinase precursor  | 1823  | 0.0     |
| " <i>F. nericia</i> " | T151023   | 00620 | Pll-type proteinase precursor  | 1779  | 0.0     |
| " <i>F. nericia</i> " | 12T306    | 00480 | Pll-type proteinase precursor  | 1771  | 0.0     |
| " <i>F. nericia</i> " | 09T494    | 01650 | Pll-type proteinase precursor  | 1747  | 0.0     |
| " <i>F. nericia</i> " | 12T272    | 18030 | Plll-type proteinase precursor | 1725  | 0.0     |
| <i>F. magna</i>       | ATCC29328 | 00370 | Pll-type proteinase precursor  | 1678  | 0.0     |
| <i>F. magna</i>       | 09T408    | 03220 | Pll-type proteinase precursor  | 157   | 5e-39   |
| " <i>F. nericia</i> " | 09T494    | 03870 | Plll-type proteinase precursor | 156   | 1e-38   |
| <i>F. magna</i>       | 07T609    | 03110 | Pll-type proteinase precursor  | 154   | 9e-38   |
| " <i>F. nericia</i> " | 12T273    | 06640 | Pll-type proteinase precursor  | 153   | 1e-37   |
| " <i>F. nericia</i> " | 12T306    | 04830 | Pll-type proteinase precursor  | 153   | 1e-37   |
| " <i>F. nericia</i> " | 12T272    | 01600 | Pll-type proteinase precursor  | 153   | 1e-37   |
| <i>F. magna</i>       | 08T492    | 02790 | Pll-type proteinase precursor  | 153   | 1e-37   |
| " <i>F. nericia</i> " | CCUG54800 | 04020 | Pll-type proteinase precursor  | 153   | 2e-37   |
| " <i>F. nericia</i> " | ATCC53516 | 07750 | Pll-type proteinase precursor  | 146   | 2e-35   |
| " <i>F. nericia</i> " | T160124   | 03150 | Pll-type proteinase precursor  | 146   | 2e-35   |

**Table S4E: Blast results showing FAF (*F. magna* adhesion factor) homologs in 12 *Fingoldia* genomes.** As query, the FAF protein of strain ALB8 (locus ID: AAO46090) was taken. As Blast cutoff: e-value < e-10.

| <b>Species</b>        | <b>strain</b> | <b>gene</b> | <b>Prokka annotation</b>          | <b>score</b> | <b>e-value</b> |
|-----------------------|---------------|-------------|-----------------------------------|--------------|----------------|
| <i>F. magna</i>       | 08T492        | 14650       | Cna protein B-type domain protein | 471          | e-158          |
| <i>F. magna</i>       | ATCC29328     | 14170       | Cna protein B-type domain protein | 467          | e-156          |
| " <i>F. nericia</i> " | CCUG54800     | 15060       | Cna protein B-type domain protein | 451          | e-150          |
| " <i>F. nericia</i> " | T160124       | 12940       | Cna protein B-type domain protein | 436          | e-144          |
| <i>F. magna</i>       | 07T609        | 13570       | Cna protein B-type domain protein | 399          | e-130          |
| " <i>F. nericia</i> " | ATCC53516     | 00150       | Cna protein B-type domain protein | 314          | 9e-98          |
| " <i>F. nericia</i> " | 12T273        | 17180       | Cna protein B-type domain protein | 306          | 2e-94          |
| " <i>F. nericia</i> " | T151023       | 14140       | Cna protein B-type domain protein | 239          | 6e-71          |
| " <i>F. nericia</i> " | 12T272        | 13990       | Cna protein B-type domain protein | 117          | 3e-29          |
| " <i>F. nericia</i> " | 12T272        | 14000       | Hypothetical protein              | 111          | 4e-27          |
| " <i>F. nericia</i> " | T151023       | 14150       | Hypothetical protein              | 75           | 1e-15          |

Table S5: *Finogoldia* sp. strains tested in the RAPID ANA II system

| strain                          | URE | BLTS | aARA | ONPG | aGLU | BGLU | aGAL | aFUC | NAG | PO4 | LGY | GLY | PRO | PAL | ARG | SER | PYR | IND |
|---------------------------------|-----|------|------|------|------|------|------|------|-----|-----|-----|-----|-----|-----|-----|-----|-----|-----|
| <i>F. magna</i> 07T609          | ÷   | ÷    | ÷    | ÷    | ÷    | ÷    | ÷    | ÷    | ÷   | ÷   | +   | +   | ÷*  | +   | +   | +   | +   | ÷   |
| <i>F. magna</i> 08T492          | ÷   | ÷    | ÷    | ÷    | ÷    | ÷    | ÷    | ÷    | ÷   | ÷   | +   | +   | ÷*  | +   | +   | +   | +   | ÷   |
| <i>F. magna</i> 09T408          | ÷   | ÷    | ÷    | ÷    | ÷    | ÷    | ÷    | ÷    | ÷   | ÷   | +   | +   | ÷*  | +   | +   | +   | +   | ÷   |
| " <i>F. nericia</i> " 09T494    | ÷   | ÷    | ÷    | ÷    | ÷    | ÷    | ÷    | ÷    | ÷   | +   | +   | +   | ÷*  | +   | +   | +   | +   | ÷   |
| " <i>F. nericia</i> " 12T272    | ÷   | ÷    | ÷    | ÷    | ÷    | ÷    | ÷    | ÷    | ÷   | ÷   | +   | +   | ÷*  | +   | +   | +   | +   | ÷   |
| " <i>F. nericia</i> " 12T273    | ÷   | ÷    | ÷    | ÷    | ÷    | ÷    | ÷    | ÷    | ÷   | ÷   | +   | +   | ÷*  | +   | +   | +   | +   | ÷   |
| " <i>F. nericia</i> " 12T306    | ÷   | ÷    | ÷    | ÷    | ÷    | ÷    | ÷    | ÷    | ÷   | +   | +   | +   | ÷*  | +   | +   | +   | +   | ÷   |
| " <i>F. nericia</i> " CCUG54800 | ÷   | ÷    | ÷    | ÷    | ÷    | ÷    | ÷    | ÷    | ÷   | +   | +   | +   | ÷*  | +   | +   | +   | +   | ÷   |
| " <i>F. nericia</i> " 15T1023   | ÷   | ÷    | ÷    | ÷    | ÷    | ÷    | ÷    | ÷    | ÷   | +   | +   | +   | ÷*  | +   | +   | +   | +   | ÷   |
| " <i>F. nericia</i> " 16T0124   | ÷   | ÷    | ÷    | ÷    | ÷    | ÷    | ÷    | ÷    | ÷   | +   | +   | +   | ÷*  | +   | +   | +   | +   | ÷   |

\* very light pink

| Reaction | Substrate                                 |
|----------|-------------------------------------------|
| URE:     | Urea                                      |
| BLTS:    | p-Nitrophenyl-β, D-disaccharide           |
| aARA:    | p-Nitrophenyl-α, L-arabinoside            |
| ONPG:    | σ-Nitrophenyl-β, D-galactoside            |
| aGLU:    | p-Nitrophenyl-α, D-glucoside              |
| BGLU:    | p-Nitrophenyl-β, D-glucoside              |
| aGAL:    | p-Nitrophenyl-α, D-galactoside            |
| aFUC:    | p-Nitrophenyl-α, L-fucoside               |
| NAG:     | p-Nitrophenyl-n-acetyl-β, D-glucosaminide |
| PO4:     | p-Nitrophenylphosphate                    |
| LGY:     | Leucyl-glycine-β-naphthylamide            |
| GLY:     | Glycine-β-naphthylamide                   |
| PRO:     | Proline-β-naphthylamide                   |
| PAL:     | Phenylalanine-β-naphthylamide             |
| ARG:     | Arginine-β-naphthylamide                  |
| SER:     | Serine-β-naphthylamide                    |
| PYR:     | Pyrrolidonyl-β-naphthylamide              |
| IND:     | Tryptophane                               |
